# Supplementary material
Source: publisher figshare collection journal article supplement (https://gsapubs.figshare.com/articles/dataset/_/12532523)
Supplement: Supplementary file 1 [file 1]

| Electron microprobe analyses of feldspars from volcanic ash beds in the Morrison Formation (wt%) |       |                  |                                |                                |       |      |                   |                  |        | End Members |              |            |         |
|--------------------------------------------------------------------------------------------------|-------|------------------|--------------------------------|--------------------------------|-------|------|-------------------|------------------|--------|-------------|--------------|------------|---------|
| Sample #                                                                                         | Grain | SiO <sub>2</sub> | Al <sub>2</sub> O <sub>3</sub> | Fe <sub>2</sub> O <sub>3</sub> | CaO   | BaO  | Na <sub>2</sub> O | K <sub>2</sub> O | Total  | Albite      | Anorthite    | Orthoclase | Celsian |
| LCM-1                                                                                            | 10a   | 64.83            | 22.83                          | 0.26                           | 3.29  | 0.14 | 8.88              | 1.16             | 101.39 | 0.774       | <b>0.159</b> | 0.067      | 0.003   |
| LCM-1                                                                                            | 10b   | 64.71            | 22.56                          | 0.29                           | 3.24  | 0.10 | 8.91              | 1.18             | 100.98 | 0.777       | 0.156        | 0.068      | 0.002   |
| LCM-1                                                                                            | 11b   | 65.70            | 21.87                          | 0.20                           | 2.32  | 0.05 | 9.47              | 1.40             | 101.00 | 0.811       | 0.110        | 0.079      | 0.001   |
| LCM-1                                                                                            | 1a    | 57.23            | 26.68                          | 0.18                           | 8.18  | 0.06 | 6.54              | 0.43             | 99.30  | 0.577       | 0.398        | 0.025      | 0.001   |
| LCM-1                                                                                            | 1b    | 58.12            | 26.44                          | 0.21                           | 7.82  | 0.01 | 6.76              | 0.45             | 99.79  | 0.594       | 0.380        | 0.026      | 0.000   |
| LCM-1                                                                                            | 2a    | 59.16            | 24.91                          | 0.28                           | 6.76  | 0.02 | 7.20              | 0.50             | 98.84  | 0.639       | 0.332        | 0.029      | 0.000   |
| LCM-1                                                                                            | 2b    | 59.36            | 25.23                          | 0.33                           | 6.63  | 0.00 | 7.14              | 0.56             | 99.25  | 0.639       | 0.328        | 0.033      | 0.000   |
| LCM-1                                                                                            | 3a    | 65.30            | 18.45                          | 0.45                           | 0.36  | 0.13 | 2.79              | 11.86            | 99.34  | 0.258       | 0.018        | 0.723      | 0.002   |
| LCM-1                                                                                            | 4a    | 59.43            | 25.15                          | 0.26                           | 6.75  | 0.03 | 7.25              | 0.79             | 99.66  | 0.631       | <b>0.324</b> | 0.045      | 0.001   |
| LCM-1                                                                                            | 4b    | 59.61            | 25.63                          | 0.25                           | 6.72  | 0.03 | 7.03              | 0.77             | 100.03 | 0.625       | 0.330        | 0.045      | 0.001   |
| LCM-1                                                                                            | 5a    | 58.23            | 26.21                          | 0.34                           | 7.77  | 0.01 | 6.81              | 0.61             | 99.98  | 0.592       | 0.373        | 0.035      | 0.000   |
| LCM-1                                                                                            | 5b    | 60.06            | 25.76                          | 0.22                           | 6.97  | 0.01 | 6.70              | 0.68             | 100.40 | 0.609       | 0.350        | 0.040      | 0.000   |
| LCM-1                                                                                            | 6a    | 67.45            | 18.94                          | 0.20                           | 0.22  | 0.11 | 5.15              | 8.94             | 101.01 | 0.462       | 0.011        | 0.527      | 0.002   |
| LCM-1                                                                                            | 6b    | 66.90            | 19.35                          | 0.14                           | 0.37  | 0.07 | 5.52              | 7.93             | 100.29 | 0.505       | 0.019        | 0.477      | 0.001   |
| LCM-1                                                                                            | 7a    | 59.10            | 25.93                          | 0.29                           | 7.24  | 0.04 | 6.72              | 0.74             | 100.06 | 0.600       | 0.357        | 0.043      | 0.001   |
| LCM-1                                                                                            | 7b    | 58.54            | 25.48                          | 0.28                           | 7.34  | 0.02 | 6.80              | 0.76             | 99.23  | 0.599       | 0.357        | 0.044      | 0.000   |
| LCM-1                                                                                            | 9a    | 66.12            | 18.70                          | 0.38                           | 0.36  | 0.03 | 4.38              | 9.50             | 99.47  | 0.405       | 0.018        | 0.577      | 0.001   |
| LCM-1                                                                                            | 9b    | 66.81            | 19.17                          | 0.49                           | 0.52  | 0.08 | 6.37              | 6.56             | 100.01 | 0.581       | 0.026        | 0.393      | 0.002   |
|                                                                                                  |       |                  |                                |                                |       |      |                   |                  |        |             |              |            |         |
| LCM-1.5                                                                                          | 1     | 64.83            | 18.81                          | 0.71                           | 0.50  | 0.19 | 3.69              | 10.20            | 98.93  | 0.346       | 0.026        | 0.628      | 0.004   |
| LCM-1.5                                                                                          | 1     | 65.13            | 19.39                          | 0.37                           | 0.68  | 0.17 | 5.19              | 8.17             | 99.09  | 0.475       | 0.034        | 0.491      | 0.003   |
| LCM-1.5                                                                                          | 2     | 62.46            | 23.34                          | 0.26                           | 4.41  | 0.18 | 8.38              | 0.87             | 99.89  | 0.736       | 0.214        | 0.050      | 0.003   |
| LCM-1.5                                                                                          | 2     | 62.56            | 23.55                          | 0.22                           | 4.61  | 0.14 | 8.36              | 0.88             | 100.31 | 0.728       | 0.222        | 0.050      | 0.002   |
| LCM-1.5                                                                                          | 2     | 62.11            | 23.75                          | 0.29                           | 4.64  | 0.13 | 8.30              | 0.87             | 100.08 | 0.726       | 0.224        | 0.050      | 0.002   |
| LCM-1.5                                                                                          | 3     | 61.69            | 23.25                          | 0.35                           | 4.33  | 0.18 | 8.51              | 0.82             | 99.13  | 0.744       | 0.209        | 0.047      | 0.003   |
| LCM-1.5                                                                                          | 3     | 63.24            | 23.41                          | 0.16                           | 4.35  | 0.13 | 8.39              | 0.80             | 100.47 | 0.741       | 0.212        | 0.046      | 0.002   |
| LCM-1.5                                                                                          | 3     | 62.40            | 23.60                          | 0.21                           | 4.43  | 0.11 | 8.36              | 0.80             | 99.91  | 0.738       | 0.216        | 0.046      | 0.002   |
| LCM-1.5                                                                                          | 4     | 62.74            | 22.77                          | 0.18                           | 3.91  | 0.23 | 8.71              | 0.95             | 99.48  | 0.758       | 0.188        | 0.054      | 0.004   |
| LCM-1.5                                                                                          | 4     | 62.82            | 22.97                          | 0.25                           | 4.02  | 0.18 | 8.43              | 0.95             | 99.61  | 0.748       | 0.197        | 0.055      | 0.003   |
| LCM-1.5                                                                                          | 4     | 62.05            | 23.20                          | 0.20                           | 4.40  | 0.17 | 8.53              | 0.93             | 99.47  | 0.737       | 0.210        | 0.053      | 0.003   |
| LCM-1.5                                                                                          | 5     | 59.07            | 26.27                          | 0.27                           | 7.54  | 0.05 | 6.92              | 0.48             | 100.61 | 0.607       | 0.365        | 0.028      | 0.001   |
| LCM-1.5                                                                                          | 5     | 58.47            | 26.05                          | 0.30                           | 7.41  | 0.06 | 6.74              | 0.53             | 99.55  | 0.603       | 0.366        | 0.031      | 0.001   |
| LCM-1.5                                                                                          | 5     | 58.38            | 26.23                          | 0.31                           | 7.57  | 0.04 | 6.87              | 0.46             | 99.86  | 0.605       | 0.368        | 0.026      | 0.001   |
| LCM-1.5                                                                                          | 6     | 58.96            | 26.14                          | 0.40                           | 7.48  | 0.00 | 6.86              | 0.42             | 100.25 | 0.609       | 0.367        | 0.024      | 0.000   |
| LCM-1.5                                                                                          | 6     | 57.48            | 26.46                          | 0.38                           | 8.06  | 0.05 | 6.57              | 0.38             | 99.37  | 0.583       | 0.395        | 0.022      | 0.001   |
| LCM-1.5                                                                                          | 6     | 57.64            | 26.31                          | 0.31                           | 8.17  | 0.09 | 6.57              | 0.39             | 99.49  | 0.579       | 0.398        | 0.023      | 0.002   |
| LCM-1.5                                                                                          | 7     | 62.58            | 23.91                          | 0.25                           | 4.64  | 0.11 | 8.27              | 0.82             | 100.58 | 0.727       | 0.225        | 0.047      | 0.002   |
| LCM-1.5                                                                                          | 7     | 61.83            | 23.69                          | 0.32                           | 4.69  | 0.14 | 8.25              | 0.85             | 99.76  | 0.724       | 0.227        | 0.049      | 0.002   |
| LCM-1.5                                                                                          | 7     | 62.39            | 23.78                          | 0.36                           | 4.70  | 0.18 | 8.22              | 0.86             | 100.48 | 0.722       | 0.228        | 0.050      | 0.003   |
| LCM-1.5                                                                                          | 8     | 57.23            | 27.07                          | 0.37                           | 8.59  | 0.06 | 6.20              | 0.41             | 99.93  | 0.553       | 0.423        | 0.024      | 0.001   |
| LCM-1.5                                                                                          | 8     | 57.09            | 26.92                          | 0.30                           | 8.63  | 0.07 | 6.20              | 0.43             | 99.65  | 0.551       | 0.424        | 0.025      | 0.001   |
| LCM-1.5                                                                                          | 8     | 56.86            | 27.19                          | 0.28                           | 8.73  | 0.03 | 6.10              | 0.41             | 99.59  | 0.545       | 0.431        | 0.024      | 0.001   |
| LCM-1.5                                                                                          | 9     | 62.24            | 23.51                          | 0.29                           | 4.57  | 0.19 | 8.26              | 0.82             | 99.88  | 0.729       | 0.223        | 0.048      | 0.003   |
| LCM-1.5                                                                                          | 9     | 62.21            | 23.34                          | 0.27                           | 4.56  | 0.10 | 8.26              | 0.77             | 99.50  | 0.732       | 0.223        | 0.045      | 0.002   |
| LCM-1.5                                                                                          | 9     | 62.43            | 23.59                          | 0.15                           | 4.73  | 0.15 | 8.26              | 0.83             | 100.15 | 0.723       | 0.229        | 0.048      | 0.003   |
| LCM-1.5                                                                                          | 10    | 60.48            | 25.48                          | 0.31                           | 6.42  | 0.11 | 7.41              | 0.57             | 100.77 | 0.654       | 0.313        | 0.033      | 0.002   |
| LCM-1.5                                                                                          | 10    | 60.45            | 25.19                          | 0.27                           | 6.43  | 0.08 | 7.37              | 0.54             | 100.31 | 0.653       | 0.315        | 0.031      | 0.001   |
| LCM-1.5                                                                                          | 10    | 60.11            | 25.49                          | 0.31                           | 6.49  | 0.09 | 7.28              | 0.55             | 100.32 | 0.648       | 0.320        | 0.032      | 0.002   |
| LCM-1.5                                                                                          | 11    | 62.44            | 23.72                          | 0.19                           | 4.54  | 0.15 | 8.33              | 0.81             | 100.17 | 0.733       | 0.221        | 0.047      | 0.003   |
| LCM-1.5                                                                                          | 11    | 62.40            | 23.74                          | 0.21                           | 4.64  | 0.07 | 8.32              | 0.81             | 100.17 | 0.729       | 0.225        | 0.046      | 0.001   |
| LCM-1.5                                                                                          | 11    | 62.25            | 23.87                          | 0.27                           | 4.80  | 0.11 | 8.09              | 0.75             | 100.13 | 0.720       | 0.236        | 0.044      | 0.002   |
| LCM-1.5                                                                                          | 12    | 64.66            | 20.08                          | 0.34                           | 1.31  | 0.28 | 5.07              | 7.88             | 99.62  | 0.462       | 0.066        | 0.472      | 0.005   |
| LCM-1.5                                                                                          | 12    | 64.82            | 20.90                          | 0.37                           | 2.24  | 0.15 | 6.84              | 4.86             | 100.17 | 0.607       | 0.110        | 0.284      | 0.003   |
| LCM-1.5                                                                                          | 13    | 64.11            | 19.06                          | 0.00                           | 0.00  | 0.00 | 0.55              | 16.26            | 99.98  | 0.049       | 0.000        | 0.951      | 0.000   |
| LCM-1.5                                                                                          | 13    | 64.38            | 19.13                          | 0.00                           | 0.01  | 0.03 | 0.58              | 16.03            | 100.17 | 0.052       | 0.001        | 0.947      | 0.001   |
| LCM-1.5                                                                                          | 13    | 64.09            | 18.92                          | 0.00                           | 0.17  | 0.05 | 0.62              | 16.02            | 99.87  | 0.055       | 0.008        | 0.937      | 0.001   |
| LCM-1.5                                                                                          | 14    | 58.05            | 25.96                          | 0.18                           | 7.32  | 0.04 | 7.11              | 0.45             | 99.10  | 0.621       | 0.353        | 0.026      | 0.001   |
| LCM-1.5                                                                                          | 14    | 57.97            | 26.47                          | 0.22                           | 7.50  | 0.08 | 6.98              | 0.41             | 99.63  | 0.612       | 0.364        | 0.024      | 0.001   |
| LCM-1.5                                                                                          | 14    | 57.56            | 26.97                          | 0.13                           | 8.16  | 0.07 | 6.54              | 0.35             | 99.78  | 0.580       | 0.400        | 0.021      | 0.001   |
|                                                                                                  |       |                  |                                |                                |       |      |                   |                  |        |             |              |            |         |
| LCM-5                                                                                            | 2     | 66.66            | 17.79                          | 0.20                           | 0.09  | 0.05 | 3.39              | 11.15            | 99.33  | 0.315       | 0.004        | 0.681      | 0.001   |
| LCM-5                                                                                            | 2     | 65.45            | 19.52                          | 0.34                           | 0.59  | 0.00 | 5.48              | 8.08             | 99.46  | 0.493       | 0.029        | 0.478      | 0.000   |
| LCM-5                                                                                            | 3     | 64.53            | 19.48                          | 0.91                           | 1.36  | 0.18 | 8.01              | 4.81             | 99.27  | 0.672       | 0.063        | 0.265      | 0.003   |
| LCM-5                                                                                            | 4     | 65.78            | 18.99                          | 0.55                           | 0.26  | 0.70 | 7.68              | 5.31             | 99.27  | 0.679       | 0.013        | 0.309      | 0.012   |
| LCM-5                                                                                            | 4     | 65.95            | 18.89                          | 0.27                           | 0.40  | 0.18 | 5.20              | 8.78             | 99.66  | 0.464       | 0.020        | 0.516      | 0.003   |
| LCM-5                                                                                            | 5     | 65.15            | 21.97                          | 0.09                           | 2.47  | 0.00 | 10.18             | 0.25             | 100.12 | 0.870       | 0.117        | 0.014      | 0.000   |
| LCM-5                                                                                            | 5     | 63.46            | 23.75                          | 0.29                           | 3.85  | 0.00 | 9.43              | 0.14             | 100.92 | 0.810       | 0.183        | 0.008      | 0.000   |
| LCM-5                                                                                            | 5     | 62.80            | 23.20                          | 0.14                           | 4.33  | 0.00 | 9.43              | 0.12             | 100.02 | 0.792       | 0.201        | 0.006      | 0.000   |
| LCM-5                                                                                            | 7     | 55.28            | 27.62                          | 0.26                           | 9.80  | 0.06 | 5.80              | 0.44             | 99.25  | 0.504       | 0.471        | 0.025      | 0.001   |
| LCM-5                                                                                            | 7     | 54.40            | 28.00                          | 0.43                           | 10.37 | 0.04 | 5.43              | 0.38             | 99.06  | 0.476       | 0.502        | 0.022      | 0.001   |
| LCM-5                                                                                            | 8     | 66.11            | 18.95                          | 0.31                           | 0.48  | 0.13 | 4.59              | 9.83             | 100.41 | 0.405       | 0.024        | 0.571      | 0.002   |
| LCM-5                                                                                            | 9     | 67.68            | 19.97                          | 0.20                           | 0.02  | 0.02 | 11.90             | 0.05             | 99.83  | 0.996       | 0.001        | 0.003      | 0.000   |
| LCM-5                                                                                            | 9     | 67.80            | 19.84                          | 0.06                           | 0.02  | 0.00 | 11.94             | 0.06             | 99.73  | 0.996       | 0.001        | 0.003      | 0.000   |
| LCM-5                                                                                            | 9     | 67.31            | 19.61                          | 0.21                           | 0.03  | 0.00 | 11.87             | 0.03             | 99.06  | 0.997       | 0.001        | 0.002      | 0.000   |
| LCM-5                                                                                            | 10    | 64.04            | 19.42                          | 0.44                           | 1.15  | 0.17 | 4.06              | 9.76             | 99.04  | 0.365       | 0.057        | 0.578      | 0.003   |

|       |    |       |       |      |       |      |      |      |        |       |       |       |       |
|-------|----|-------|-------|------|-------|------|------|------|--------|-------|-------|-------|-------|
| LCM-5 | 11 | 65.56 | 20.93 | 0.38 | 1.98  | 0.08 | 9.94 | 0.90 | 99.77  | 0.855 | 0.094 | 0.051 | 0.001 |
| LCM-5 | 12 | 65.40 | 19.15 | 0.50 | 0.47  | 0.16 | 5.62 | 8.27 | 99.56  | 0.496 | 0.023 | 0.481 | 0.003 |
| LCM-5 |    | 60.81 | 24.22 | 0.26 | 6.32  | 0.14 | 7.02 | 0.83 | 99.60  | 0.635 | 0.316 | 0.049 | 0.003 |
| LCM-5 |    | 60.91 | 24.40 | 0.30 | 6.44  | 0.14 | 7.07 | 0.93 | 100.18 | 0.629 | 0.316 | 0.054 | 0.003 |
| LCM-5 |    | 61.00 | 25.02 | 0.29 | 6.64  | 0.17 | 6.98 | 0.85 | 100.94 | 0.623 | 0.327 | 0.050 | 0.003 |
| LCM-5 |    | 60.08 | 24.86 | 0.29 | 7.08  | 0.14 | 6.73 | 0.82 | 100.00 | 0.602 | 0.350 | 0.048 | 0.003 |
| LCM-5 |    | 59.87 | 25.06 | 0.26 | 6.95  | 0.19 | 6.58 | 0.76 | 99.67  | 0.602 | 0.352 | 0.046 | 0.004 |
| LCM-5 |    | 60.00 | 25.00 | 0.32 | 7.14  | 0.13 | 6.66 | 0.79 | 100.03 | 0.599 | 0.355 | 0.046 | 0.002 |
| LCM-5 |    | 59.76 | 25.00 | 0.34 | 7.05  | 0.15 | 6.51 | 0.80 | 99.62  | 0.595 | 0.356 | 0.048 | 0.003 |
| LCM-5 |    | 59.59 | 25.62 | 0.43 | 7.57  | 0.14 | 6.44 | 0.67 | 100.45 | 0.582 | 0.378 | 0.040 | 0.002 |
| LCM-5 |    | 58.86 | 25.16 | 0.36 | 7.75  | 0.18 | 6.55 | 0.68 | 99.53  | 0.581 | 0.380 | 0.040 | 0.003 |
| LCM-5 |    | 59.67 | 25.78 | 0.33 | 7.73  | 0.11 | 6.54 | 0.66 | 100.82 | 0.582 | 0.380 | 0.039 | 0.002 |
| LCM-5 |    | 58.46 | 25.21 | 0.35 | 7.84  | 0.06 | 6.57 | 0.68 | 99.17  | 0.579 | 0.382 | 0.039 | 0.001 |
| LCM-5 |    | 59.14 | 25.71 | 0.31 | 7.85  | 0.10 | 6.56 | 0.62 | 100.27 | 0.580 | 0.384 | 0.036 | 0.002 |
| LCM-5 |    | 58.81 | 25.54 | 0.33 | 7.84  | 0.11 | 6.51 | 0.63 | 99.77  | 0.578 | 0.385 | 0.037 | 0.002 |
| LCM-5 |    | 59.09 | 25.61 | 0.37 | 7.82  | 0.08 | 6.44 | 0.63 | 100.04 | 0.576 | 0.387 | 0.037 | 0.001 |
| LCM-5 |    | 58.58 | 25.50 | 0.30 | 7.89  | 0.15 | 6.36 | 0.66 | 99.44  | 0.570 | 0.391 | 0.039 | 0.003 |
| LCM-5 |    | 58.44 | 25.96 | 0.29 | 8.04  | 0.08 | 6.44 | 0.60 | 99.85  | 0.571 | 0.394 | 0.035 | 0.001 |
| LCM-5 |    | 58.77 | 25.71 | 0.33 | 8.05  | 0.06 | 6.40 | 0.64 | 99.96  | 0.568 | 0.395 | 0.037 | 0.001 |
| LCM-5 |    | 57.87 | 26.49 | 0.31 | 8.32  | 0.11 | 6.17 | 0.60 | 99.87  | 0.553 | 0.412 | 0.035 | 0.002 |
| LCM-5 |    | 58.72 | 26.25 | 0.36 | 8.31  | 0.07 | 6.15 | 0.59 | 100.46 | 0.552 | 0.413 | 0.035 | 0.001 |
| LCM-5 |    | 58.18 | 26.12 | 0.41 | 8.47  | 0.11 | 6.18 | 0.55 | 100.02 | 0.551 | 0.417 | 0.032 | 0.002 |
| LCM-5 |    | 57.94 | 26.33 | 0.26 | 8.47  | 0.10 | 6.07 | 0.56 | 99.72  | 0.546 | 0.421 | 0.033 | 0.002 |
| LCM-5 |    | 58.00 | 26.35 | 0.36 | 8.52  | 0.05 | 6.06 | 0.60 | 99.93  | 0.543 | 0.422 | 0.035 | 0.001 |
| LCM-5 |    | 57.73 | 25.97 | 0.36 | 8.58  | 0.04 | 6.12 | 0.57 | 99.38  | 0.544 | 0.422 | 0.034 | 0.001 |
| LCM-5 |    | 57.59 | 26.36 | 0.36 | 8.70  | 0.08 | 5.97 | 0.56 | 99.62  | 0.535 | 0.432 | 0.033 | 0.001 |
| LCM-5 |    | 57.51 | 26.48 | 0.31 | 8.82  | 0.05 | 5.96 | 0.54 | 99.65  | 0.533 | 0.436 | 0.032 | 0.001 |
| LCM-5 |    | 58.24 | 26.49 | 0.41 | 8.87  | 0.10 | 5.92 | 0.53 | 100.56 | 0.530 | 0.439 | 0.031 | 0.002 |
| LCM-5 |    | 57.43 | 26.42 | 0.36 | 8.92  | 0.09 | 5.92 | 0.51 | 99.64  | 0.529 | 0.441 | 0.030 | 0.002 |
| LCM-5 |    | 57.07 | 26.82 | 0.44 | 9.26  | 0.08 | 5.76 | 0.51 | 99.94  | 0.514 | 0.456 | 0.030 | 0.001 |
| LCM-5 |    | 56.70 | 27.16 | 0.32 | 9.51  | 0.11 | 5.57 | 0.42 | 99.78  | 0.502 | 0.473 | 0.025 | 0.002 |
| LCM-5 |    | 57.18 | 27.42 | 0.24 | 9.63  | 0.10 | 5.51 | 0.46 | 100.54 | 0.495 | 0.478 | 0.027 | 0.002 |
|       |    |       |       |      |       |      |      |      |        |       |       |       |       |
| LCM-6 | 2  | 59.33 | 24.85 | 0.38 | 6.48  | 0.10 | 6.86 | 0.73 | 98.72  | 0.628 | 0.328 | 0.044 | 0.002 |
| LCM-6 | 11 | 57.29 | 26.54 | 0.39 | 8.62  | 0.09 | 6.06 | 0.56 | 99.56  | 0.542 | 0.425 | 0.033 | 0.002 |
| LCM-6 | 1  | 60.45 | 24.89 | 0.43 | 6.31  | 0.13 | 7.09 | 0.76 | 100.06 | 0.640 | 0.315 | 0.045 | 0.002 |
| LCM-6 | 1  | 60.07 | 24.80 | 0.33 | 6.46  | 0.08 | 7.22 | 0.78 | 99.74  | 0.639 | 0.316 | 0.045 | 0.001 |
| LCM-6 | 1  | 60.68 | 25.23 | 0.37 | 6.43  | 0.11 | 7.00 | 0.75 | 100.57 | 0.634 | 0.321 | 0.045 | 0.002 |
| LCM-6 | 2  | 59.57 | 24.84 | 0.28 | 6.57  | 0.10 | 6.98 | 0.79 | 99.12  | 0.627 | 0.326 | 0.046 | 0.002 |
| LCM-6 | 2  | 58.72 | 25.01 | 0.35 | 6.55  | 0.13 | 6.93 | 0.76 | 98.46  | 0.627 | 0.328 | 0.045 | 0.002 |
| LCM-6 | 3  | 57.24 | 27.33 | 0.45 | 8.81  | 0.07 | 5.89 | 0.55 | 100.34 | 0.530 | 0.438 | 0.032 | 0.001 |
| LCM-6 | 3  | 56.32 | 26.68 | 0.47 | 9.02  | 0.09 | 5.69 | 0.55 | 98.82  | 0.516 | 0.452 | 0.033 | 0.002 |
| LCM-6 | 3  | 56.65 | 27.47 | 0.45 | 9.08  | 0.09 | 5.75 | 0.53 | 100.02 | 0.517 | 0.452 | 0.031 | 0.002 |
| LCM-6 | 4  | 60.67 | 24.59 | 0.33 | 6.32  | 0.12 | 7.11 | 0.81 | 99.95  | 0.638 | 0.314 | 0.048 | 0.002 |
| LCM-6 | 4  | 60.32 | 24.54 | 0.39 | 6.29  | 0.12 | 6.94 | 0.81 | 99.41  | 0.634 | 0.317 | 0.049 | 0.002 |
| LCM-6 | 4  | 60.37 | 24.60 | 0.35 | 6.40  | 0.12 | 7.04 | 0.78 | 99.67  | 0.635 | 0.319 | 0.046 | 0.002 |
| LCM-6 | 5  | 57.36 | 26.25 | 0.32 | 8.38  | 0.12 | 6.25 | 0.60 | 99.28  | 0.555 | 0.411 | 0.035 | 0.002 |
| LCM-6 | 5  | 56.53 | 26.04 | 0.41 | 8.51  | 0.08 | 6.24 | 0.57 | 98.37  | 0.551 | 0.416 | 0.033 | 0.001 |
| LCM-6 | 6  | 60.02 | 24.54 | 0.38 | 6.07  | 0.11 | 7.34 | 0.81 | 99.27  | 0.654 | 0.299 | 0.047 | 0.002 |
| LCM-6 | 6  | 60.02 | 24.54 | 0.38 | 6.07  | 0.11 | 7.34 | 0.81 | 99.27  | 0.654 | 0.299 | 0.047 | 0.002 |
| LCM-6 | 6  | 60.26 | 24.85 | 0.32 | 6.40  | 0.19 | 7.26 | 0.77 | 100.04 | 0.642 | 0.313 | 0.045 | 0.003 |
| LCM-6 | 7  | 60.21 | 24.33 | 0.43 | 6.19  | 0.11 | 7.27 | 0.83 | 99.37  | 0.647 | 0.304 | 0.049 | 0.002 |
| LCM-6 | 7  | 60.27 | 25.22 | 0.41 | 6.58  | 0.16 | 7.06 | 0.74 | 100.44 | 0.632 | 0.325 | 0.043 | 0.003 |
| LCM-6 | 8  | 59.37 | 24.51 | 0.34 | 6.17  | 0.15 | 7.16 | 0.79 | 98.48  | 0.646 | 0.307 | 0.047 | 0.003 |
| LCM-6 | 8  | 58.03 | 25.50 | 0.36 | 7.18  | 0.07 | 6.72 | 0.67 | 98.53  | 0.604 | 0.356 | 0.040 | 0.001 |
| LCM-6 | 9  | 60.39 | 22.93 | 0.39 | 5.30  | 0.13 | 7.87 | 1.02 | 98.03  | 0.686 | 0.255 | 0.058 | 0.002 |
| LCM-6 | 9  | 61.13 | 23.65 | 0.29 | 5.43  | 0.25 | 7.47 | 1.00 | 99.21  | 0.671 | 0.270 | 0.059 | 0.005 |
| LCM-6 | 10 | 60.38 | 23.63 | 0.37 | 5.59  | 0.14 | 7.51 | 0.93 | 98.54  | 0.670 | 0.276 | 0.055 | 0.002 |
| LCM-6 | 10 | 60.57 | 24.16 | 0.32 | 5.68  | 0.18 | 7.42 | 0.95 | 99.28  | 0.664 | 0.281 | 0.056 | 0.003 |
| LCM-6 | 11 | 56.87 | 26.49 | 0.41 | 8.96  | 0.07 | 6.02 | 0.52 | 99.35  | 0.532 | 0.437 | 0.030 | 0.001 |
| LCM-6 | 12 | 62.96 | 23.05 | 0.26 | 3.97  | 0.34 | 8.15 | 1.40 | 100.11 | 0.723 | 0.195 | 0.082 | 0.006 |
| LCM-6 | 12 | 62.23 | 22.95 | 0.25 | 4.29  | 0.25 | 7.90 | 1.31 | 99.16  | 0.710 | 0.213 | 0.077 | 0.005 |
| LCM-9 | 1  | 55.70 | 28.24 | 0.22 | 10.84 | 0.00 | 5.45 | 0.28 | 100.73 | 0.469 | 0.515 | 0.016 | 0.000 |
|       |    |       |       |      |       |      |      |      |        |       |       |       |       |
| LCM-9 | 1  | 52.84 | 29.80 | 0.33 | 13.16 | 0.00 | 4.57 | 0.17 | 100.87 | 0.382 | 0.608 | 0.009 | 0.000 |
| LCM-9 | 1  | 51.97 | 30.44 | 0.26 | 13.94 | 0.01 | 3.99 | 0.17 | 100.77 | 0.338 | 0.653 | 0.009 | 0.000 |
| LCM-9 | 2  | 58.88 | 25.32 | 0.42 | 7.72  | 0.09 | 7.19 | 0.47 | 100.09 | 0.611 | 0.362 | 0.026 | 0.002 |
| LCM-9 | 2  | 58.03 | 24.92 | 0.36 | 7.90  | 0.11 | 6.93 | 0.45 | 98.69  | 0.598 | 0.376 | 0.026 | 0.002 |
| LCM-9 | 2  | 57.58 | 25.05 | 0.31 | 7.93  | 0.15 | 6.90 | 0.46 | 98.38  | 0.596 | 0.378 | 0.026 | 0.003 |
| LCM-9 | 3  | 58.09 | 25.61 | 0.33 | 8.46  | 0.10 | 6.65 | 0.47 | 99.70  | 0.572 | 0.402 | 0.026 | 0.002 |
| LCM-9 | 3  | 58.00 | 26.43 | 0.57 | 8.83  | 0.09 | 6.00 | 0.46 | 100.38 | 0.536 | 0.436 | 0.027 | 0.002 |
| LCM-9 | 4  | 59.44 | 24.84 | 0.44 | 7.45  | 0.07 | 6.93 | 0.57 | 99.73  | 0.607 | 0.361 | 0.033 | 0.001 |
| LCM-9 | 4  | 59.15 | 25.54 | 0.37 | 7.56  | 0.12 | 6.73 | 0.56 | 100.03 | 0.597 | 0.370 | 0.033 | 0.002 |
| LCM-9 | 4  | 58.27 | 26.79 | 0.44 | 8.92  | 0.14 | 5.88 | 0.44 | 100.87 | 0.530 | 0.444 | 0.026 | 0.002 |
| LCM-9 | 5  | 56.66 | 26.01 | 0.42 | 9.00  | 0.08 | 6.49 | 0.41 | 99.05  | 0.553 | 0.424 | 0.023 | 0.001 |
| LCM-9 | 5  | 56.49 | 26.39 | 0.35 | 9.36  | 0.05 | 6.32 | 0.41 | 99.36  | 0.537 | 0.440 | 0.023 | 0.001 |
| LCM-9 | 6  | 51.94 | 29.47 | 0.69 | 13.45 | 0.03 | 4.37 | 0.20 | 100.15 | 0.366 | 0.623 | 0.011 | 0.001 |

|        |     |       |       |      |       |      |       |       |        |       |       |       |       |
|--------|-----|-------|-------|------|-------|------|-------|-------|--------|-------|-------|-------|-------|
| LCM-9  | 6   | 52.11 | 29.73 | 0.74 | 13.84 | 0.03 | 3.69  | 0.18  | 100.33 | 0.322 | 0.668 | 0.010 | 0.001 |
| LCM-9  | 7   | 56.59 | 26.21 | 0.46 | 9.34  | 0.12 | 6.30  | 0.40  | 99.41  | 0.537 | 0.440 | 0.022 | 0.002 |
| LCM-9  | 7   | 56.29 | 26.10 | 0.53 | 9.50  | 0.05 | 6.24  | 0.37  | 99.08  | 0.532 | 0.448 | 0.020 | 0.001 |
| LCM-9  | 8   | 58.23 | 26.44 | 0.42 | 8.80  | 0.11 | 6.56  | 0.44  | 100.99 | 0.560 | 0.415 | 0.025 | 0.002 |
| LCM-9  | 8   | 57.62 | 26.46 | 0.40 | 9.04  | 0.15 | 6.41  | 0.43  | 100.51 | 0.548 | 0.427 | 0.024 | 0.003 |
| LCM-9  | 10  | 56.78 | 26.94 | 0.53 | 9.61  | 0.00 | 6.06  | 0.38  | 100.30 | 0.521 | 0.457 | 0.022 | 0.000 |
| LCM-9  | 10  | 55.92 | 27.91 | 0.46 | 10.40 | 0.05 | 5.77  | 0.32  | 100.83 | 0.492 | 0.490 | 0.018 | 0.001 |
| LCM-9  | 11  | 59.85 | 24.42 | 0.42 | 6.45  | 0.22 | 7.39  | 0.69  | 99.43  | 0.648 | 0.312 | 0.040 | 0.004 |
| LCM-9  |     | 63.23 | 18.75 | 0.00 | 0.00  | 0.25 | 0.85  | 16.05 | 99.13  | 0.075 | 0.000 | 0.925 | 0.004 |
| LCM-9  |     | 64.73 | 18.91 | 0.00 | 0.01  | 0.23 | 0.63  | 16.14 | 100.64 | 0.056 | 0.000 | 0.944 | 0.004 |
| LCM-9  |     | 60.54 | 24.76 | 0.35 | 5.75  | 0.16 | 7.66  | 0.88  | 100.09 | 0.671 | 0.278 | 0.051 | 0.003 |
| LCM-9  |     | 60.18 | 24.67 | 0.40 | 5.78  | 0.13 | 7.68  | 0.89  | 99.73  | 0.670 | 0.279 | 0.051 | 0.002 |
| LCM-10 | 10a | 57.48 | 27.44 | 0.35 | 9.13  | 0.08 | 6.04  | 0.33  | 100.84 | 0.535 | 0.446 | 0.019 | 0.001 |
| LCM-10 | 10b | 57.12 | 27.38 | 0.29 | 9.01  | 0.02 | 6.03  | 0.30  | 100.15 | 0.538 | 0.444 | 0.017 | 0.000 |
| LCM-10 | 10c | 56.65 | 26.90 | 0.43 | 9.03  | 0.04 | 6.12  | 0.33  | 99.49  | 0.540 | 0.441 | 0.019 | 0.001 |
| LCM-10 | 11a | 60.92 | 25.04 | 0.31 | 5.97  | 0.01 | 8.02  | 0.22  | 100.49 | 0.700 | 0.288 | 0.013 | 0.000 |
| LCM-10 | 11b | 60.76 | 25.24 | 0.21 | 6.18  | 0.07 | 7.94  | 0.18  | 100.57 | 0.692 | 0.298 | 0.010 | 0.001 |
| LCM-10 | 11c | 60.35 | 25.35 | 0.30 | 6.64  | 0.00 | 7.62  | 0.28  | 100.53 | 0.664 | 0.320 | 0.016 | 0.000 |
| LCM-10 | 2a  | 66.25 | 20.00 | 0.73 | 1.07  | 0.09 | 9.34  | 1.83  | 99.31  | 0.839 | 0.053 | 0.108 | 0.002 |
| LCM-10 | 2b  | 66.28 | 20.03 | 0.30 | 1.13  | 0.09 | 9.55  | 1.99  | 99.36  | 0.832 | 0.054 | 0.114 | 0.001 |
| LCM-10 | 2c  | 67.41 | 19.73 | 0.34 | 0.99  | 0.14 | 9.85  | 1.67  | 100.12 | 0.857 | 0.048 | 0.095 | 0.002 |
| LCM-10 | 3a  | 52.23 | 30.35 | 0.66 | 12.36 | 0.00 | 4.00  | 0.39  | 99.98  | 0.361 | 0.616 | 0.023 | 0.000 |
| LCM-10 | 3a  | 52.80 | 30.41 | 0.83 | 12.38 | 0.00 | 3.96  | 0.36  | 100.75 | 0.359 | 0.620 | 0.022 | 0.000 |
| LCM-10 | 3b  | 50.25 | 31.19 | 0.78 | 13.68 | 0.00 | 3.29  | 0.28  | 99.47  | 0.298 | 0.685 | 0.016 | 0.000 |
| LCM-10 | 4a  | 53.81 | 29.31 | 0.31 | 11.15 | 0.00 | 4.77  | 0.20  | 99.54  | 0.431 | 0.557 | 0.012 | 0.000 |
| LCM-10 | 4b  | 54.83 | 29.36 | 0.31 | 10.96 | 0.00 | 4.87  | 0.21  | 100.54 | 0.440 | 0.547 | 0.013 | 0.000 |
| LCM-10 | 4c  | 55.15 | 28.39 | 0.37 | 10.36 | 0.04 | 5.33  | 0.23  | 99.86  | 0.475 | 0.511 | 0.013 | 0.001 |
| LCM-10 | 5a  | 56.65 | 26.97 | 0.24 | 8.78  | 0.06 | 6.16  | 0.34  | 99.21  | 0.548 | 0.432 | 0.020 | 0.001 |
| LCM-10 | 5c  | 55.56 | 27.63 | 0.40 | 9.53  | 0.04 | 5.80  | 0.27  | 99.23  | 0.516 | 0.469 | 0.016 | 0.001 |
| LCM-10 | 6a  | 65.88 | 19.07 | 0.12 | 0.03  | 0.04 | 4.80  | 9.91  | 99.84  | 0.424 | 0.001 | 0.575 | 0.001 |
| LCM-10 | 6b  | 65.00 | 18.99 | 0.00 | 0.01  | 0.05 | 1.67  | 14.76 | 100.47 | 0.147 | 0.000 | 0.853 | 0.001 |
| LCM-10 | 6c  | 65.82 | 19.66 | 0.12 | 0.01  | 0.05 | 4.62  | 10.43 | 100.72 | 0.402 | 0.001 | 0.597 | 0.001 |
| LCM-10 | 7a  | 55.64 | 28.36 | 0.30 | 9.81  | 0.02 | 5.52  | 0.25  | 99.89  | 0.497 | 0.488 | 0.015 | 0.000 |
| LCM-10 | 7b  | 56.62 | 28.27 | 0.35 | 9.50  | 0.05 | 5.76  | 0.24  | 100.79 | 0.516 | 0.470 | 0.014 | 0.001 |
| LCM-10 | 7c  | 55.66 | 27.85 | 0.34 | 9.88  | 0.05 | 5.76  | 0.25  | 99.79  | 0.506 | 0.479 | 0.015 | 0.001 |
| LCM-10 | 8a  | 55.62 | 27.69 | 0.45 | 9.76  | 0.02 | 5.77  | 0.25  | 99.56  | 0.509 | 0.476 | 0.015 | 0.000 |
| LCM-10 | 8b  | 56.55 | 27.65 | 0.45 | 9.44  | 0.02 | 5.82  | 0.27  | 100.20 | 0.519 | 0.465 | 0.016 | 0.000 |
| LCM-10 | 8c  | 55.93 | 27.59 | 0.31 | 9.54  | 0.08 | 5.70  | 0.28  | 99.43  | 0.511 | 0.472 | 0.017 | 0.001 |
| LCM-10 | 9a  | 69.25 | 20.29 | 0.00 | 0.07  | 0.00 | 11.76 | 0.10  | 101.47 | 0.991 | 0.003 | 0.005 | 0.000 |
| LCM-10 | 9b  | 68.54 | 20.08 | 0.08 | 0.11  | 0.00 | 11.86 | 0.06  | 100.72 | 0.992 | 0.005 | 0.003 | 0.000 |
| LCM-10 | 9c  | 68.58 | 19.87 | 0.11 | 0.08  | 0.14 | 11.64 | 0.11  | 100.53 | 0.990 | 0.004 | 0.006 | 0.002 |
| LCM-12 | 1   | 58.56 | 26.14 | 0.49 | 7.99  | 0.05 | 6.58  | 0.75  | 100.55 | 0.573 | 0.384 | 0.043 | 0.001 |
| LCM-12 | 1   | 56.48 | 27.10 | 0.67 | 9.27  | 0.03 | 5.99  | 0.53  | 100.07 | 0.523 | 0.447 | 0.030 | 0.001 |
| LCM-12 | 1   | 56.07 | 27.64 | 0.69 | 9.39  | 0.10 | 5.93  | 0.54  | 100.37 | 0.517 | 0.452 | 0.031 | 0.002 |
| LCM-12 | 1   | 59.26 | 25.98 | 0.31 | 7.76  | 0.07 | 6.77  | 0.55  | 100.71 | 0.593 | 0.376 | 0.032 | 0.001 |
| LCM-12 | 2   | 54.91 | 28.55 | 0.67 | 10.53 | 0.05 | 5.19  | 0.36  | 100.27 | 0.462 | 0.517 | 0.021 | 0.001 |
| LCM-12 | 2   | 54.28 | 28.82 | 0.59 | 11.04 | 0.01 | 4.91  | 0.33  | 99.98  | 0.438 | 0.543 | 0.019 | 0.000 |
| LCM-12 | 2   | 54.40 | 29.16 | 0.71 | 11.22 | 0.04 | 4.91  | 0.31  | 100.75 | 0.434 | 0.548 | 0.018 | 0.001 |
| LCM-12 | 2   | 60.31 | 24.70 | 0.42 | 6.63  | 0.09 | 7.32  | 0.86  | 100.33 | 0.634 | 0.317 | 0.049 | 0.002 |
| LCM-12 | 2   | 56.31 | 27.57 | 0.55 | 10.16 | 0.02 | 5.62  | 0.46  | 100.68 | 0.487 | 0.487 | 0.026 | 0.000 |
| LCM-12 | 2   | 54.69 | 28.66 | 0.46 | 11.42 | 0.00 | 5.19  | 0.34  | 100.75 | 0.443 | 0.538 | 0.019 | 0.000 |
| LCM-12 | 2   | 53.94 | 29.42 | 0.48 | 12.42 | 0.03 | 4.63  | 0.27  | 101.18 | 0.397 | 0.588 | 0.015 | 0.000 |
| LCM-12 | 3   | 62.12 | 23.01 | 0.31 | 3.98  | 0.19 | 8.59  | 1.26  | 99.46  | 0.740 | 0.189 | 0.071 | 0.003 |
| LCM-12 | 3   | 61.69 | 23.27 | 0.29 | 4.18  | 0.17 | 8.36  | 1.19  | 99.15  | 0.730 | 0.202 | 0.068 | 0.003 |
| LCM-12 | 3   | 62.04 | 23.89 | 0.31 | 4.61  | 0.15 | 8.22  | 1.05  | 100.27 | 0.717 | 0.222 | 0.060 | 0.003 |
| LCM-12 | 4   | 55.11 | 28.82 | 0.65 | 10.69 | 0.01 | 5.12  | 0.42  | 100.80 | 0.453 | 0.523 | 0.024 | 0.000 |
| LCM-12 | 4   | 53.55 | 29.65 | 0.63 | 11.72 | 0.04 | 4.50  | 0.34  | 100.43 | 0.401 | 0.578 | 0.020 | 0.001 |
| LCM-12 | 4   | 51.13 | 30.66 | 0.66 | 12.93 | 0.02 | 3.93  | 0.25  | 99.57  | 0.350 | 0.636 | 0.014 | 0.000 |
| LCM-12 | 4   | 59.34 | 25.05 | 0.44 | 7.28  | 0.09 | 7.24  | 0.80  | 100.23 | 0.614 | 0.341 | 0.045 | 0.002 |
| LCM-12 | 5   | 68.05 | 19.94 | 0.00 | 0.10  | 0.00 | 11.84 | 0.03  | 99.96  | 0.994 | 0.005 | 0.002 | 0.000 |
| LCM-12 | 5   | 67.47 | 20.28 | 0.05 | 0.12  | 0.03 | 11.72 | 0.04  | 99.71  | 0.992 | 0.006 | 0.002 | 0.001 |
| LCM-12 | 6   | 55.82 | 27.71 | 0.47 | 9.78  | 0.02 | 5.51  | 0.43  | 99.73  | 0.492 | 0.483 | 0.025 | 0.000 |
| LCM-12 | 6   | 55.77 | 27.83 | 0.53 | 9.68  | 0.03 | 5.45  | 0.43  | 99.71  | 0.492 | 0.483 | 0.026 | 0.000 |
| LCM-12 | 6   | 55.14 | 27.87 | 0.54 | 9.89  | 0.02 | 5.51  | 0.41  | 99.39  | 0.490 | 0.486 | 0.024 | 0.000 |
| LCM-12 | 6   | 59.57 | 25.62 | 0.41 | 7.60  | 0.13 | 7.07  | 0.72  | 101.11 | 0.602 | 0.358 | 0.040 | 0.002 |
| LCM-12 | 7   | 58.33 | 25.77 | 0.51 | 7.59  | 0.05 | 6.62  | 0.64  | 99.50  | 0.589 | 0.374 | 0.037 | 0.001 |
| LCM-12 | 7   | 55.27 | 27.70 | 0.40 | 9.72  | 0.03 | 5.60  | 0.43  | 99.16  | 0.498 | 0.477 | 0.025 | 0.001 |
| LCM-12 | 7   | 55.38 | 27.80 | 0.60 | 9.82  | 0.04 | 5.60  | 0.45  | 99.68  | 0.495 | 0.479 | 0.026 | 0.001 |
| LCM-12 | 8   | 54.84 | 28.08 | 0.64 | 10.23 | 0.04 | 5.33  | 0.41  | 99.57  | 0.474 | 0.503 | 0.024 | 0.001 |
| LCM-12 | 8   | 53.85 | 28.78 | 0.73 | 10.67 | 0.01 | 5.06  | 0.36  | 99.47  | 0.452 | 0.527 | 0.021 | 0.000 |
| LCM-12 | 8   | 54.02 | 28.85 | 0.66 | 10.96 | 0.03 | 4.86  | 0.32  | 99.71  | 0.437 | 0.544 | 0.019 | 0.001 |
| LCM-12 | 9   | 56.69 | 27.44 | 0.51 | 9.10  | 0.06 | 5.90  | 0.48  | 100.17 | 0.525 | 0.447 | 0.028 | 0.001 |
| LCM-12 | 9   | 56.03 | 27.21 | 0.54 | 9.38  | 0.03 | 5.78  | 0.48  | 99.45  | 0.512 | 0.460 | 0.028 | 0.001 |
| LCM-12 | 9   | 55.75 | 28.08 | 0.55 | 9.91  | 0.07 | 5.62  | 0.43  | 100.40 | 0.494 | 0.482 | 0.025 | 0.001 |

|        |            |       |       |      |       |      |      |      |        |       |       |       |       |
|--------|------------|-------|-------|------|-------|------|------|------|--------|-------|-------|-------|-------|
| LCM-12 | 10         | 57.40 | 26.33 | 0.59 | 8.19  | 0.09 | 6.35 | 0.61 | 99.56  | 0.563 | 0.401 | 0.035 | 0.002 |
| LCM-12 | 10         | 54.58 | 28.33 | 0.48 | 10.36 | 0.04 | 5.37 | 0.37 | 99.54  | 0.474 | 0.505 | 0.022 | 0.001 |
| LCM-12 | 10         | 54.22 | 28.84 | 0.40 | 10.70 | 0.07 | 5.14 | 0.34 | 99.71  | 0.456 | 0.524 | 0.020 | 0.001 |
| LCM-12 | 11         | 55.86 | 27.04 | 0.53 | 9.10  | 0.05 | 6.08 | 0.57 | 99.22  | 0.529 | 0.438 | 0.033 | 0.001 |
| LCM-12 | 11         | 55.99 | 27.79 | 0.59 | 9.37  | 0.06 | 5.79 | 0.47 | 100.06 | 0.514 | 0.459 | 0.027 | 0.001 |
| LCM-12 | 11         | 54.69 | 28.35 | 0.60 | 10.15 | 0.07 | 5.40 | 0.42 | 99.68  | 0.478 | 0.497 | 0.024 | 0.001 |
| LCM-12 | 12         | 60.28 | 24.66 | 0.41 | 5.91  | 0.11 | 7.52 | 0.85 | 99.75  | 0.663 | 0.288 | 0.049 | 0.002 |
| LCM-12 | 12         | 60.46 | 24.89 | 0.31 | 6.08  | 0.11 | 7.61 | 0.80 | 100.26 | 0.662 | 0.292 | 0.046 | 0.002 |
| LCM-12 | 12         | 59.64 | 24.83 | 0.36 | 6.32  | 0.17 | 7.54 | 0.75 | 99.60  | 0.654 | 0.303 | 0.043 | 0.003 |
| LCM-12 | 13         | 57.86 | 26.16 | 0.38 | 8.02  | 0.06 | 6.49 | 0.51 | 99.48  | 0.576 | 0.394 | 0.030 | 0.001 |
| LCM-12 | 13         | 58.03 | 26.78 | 0.35 | 8.07  | 0.12 | 6.48 | 0.49 | 100.31 | 0.575 | 0.396 | 0.028 | 0.002 |
| LCM-12 | 13         | 57.13 | 27.17 | 0.37 | 8.57  | 0.08 | 6.32 | 0.47 | 100.11 | 0.556 | 0.417 | 0.027 | 0.001 |
| LCM-13 | 2          | 61.20 | 24.93 | 0.33 | 5.66  | 0.13 | 7.27 | 0.81 | 100.32 | 0.665 | 0.286 | 0.049 | 0.002 |
| LCM-13 | 5          | 59.09 | 25.23 | 0.21 | 6.57  | 0.14 | 7.09 | 0.68 | 99.01  | 0.635 | 0.325 | 0.040 | 0.003 |
| LCM-13 | 7          | 63.08 | 22.39 | 0.29 | 3.24  | 0.36 | 8.20 | 1.55 | 99.11  | 0.745 | 0.163 | 0.093 | 0.007 |
| LCM-13 | 10a        | 62.60 | 24.13 | 0.28 | 4.78  | 0.17 | 8.10 | 1.01 | 101.07 | 0.711 | 0.231 | 0.058 | 0.003 |
| LCM-13 | 10b        | 62.22 | 23.77 | 0.33 | 4.56  | 0.20 | 8.22 | 1.00 | 100.30 | 0.721 | 0.221 | 0.058 | 0.003 |
| LCM-13 | 10c        | 62.99 | 24.16 | 0.25 | 4.67  | 0.18 | 7.98 | 1.03 | 101.25 | 0.710 | 0.230 | 0.060 | 0.003 |
| LCM-13 | 11a        | 62.61 | 23.94 | 0.31 | 4.79  | 0.19 | 8.01 | 1.02 | 100.87 | 0.707 | 0.233 | 0.059 | 0.003 |
| LCM-13 | 11b        | 62.65 | 23.79 | 0.33 | 4.72  | 0.22 | 8.11 | 1.05 | 100.85 | 0.711 | 0.229 | 0.061 | 0.004 |
| LCM-13 | 11c        | 62.37 | 23.98 | 0.28 | 4.86  | 0.20 | 8.14 | 1.00 | 100.83 | 0.709 | 0.234 | 0.057 | 0.004 |
| LCM-13 | 12a        | 61.62 | 24.95 | 0.22 | 5.73  | 0.12 | 7.80 | 0.75 | 101.20 | 0.680 | 0.276 | 0.043 | 0.002 |
| LCM-13 | 12b        | 60.96 | 24.82 | 0.37 | 5.59  | 0.14 | 7.79 | 0.76 | 100.43 | 0.684 | 0.272 | 0.044 | 0.003 |
| LCM-13 | 12c        | 62.26 | 24.19 | 0.35 | 5.04  | 0.14 | 7.82 | 0.90 | 100.70 | 0.699 | 0.249 | 0.053 | 0.002 |
| LCM-13 | 14a        | 64.86 | 21.69 | 0.33 | 2.48  | 0.30 | 8.78 | 1.97 | 100.39 | 0.767 | 0.120 | 0.113 | 0.005 |
| LCM-13 | 14a        | 65.06 | 21.79 | 0.17 | 2.50  | 0.34 | 8.67 | 1.97 | 100.51 | 0.764 | 0.122 | 0.114 | 0.006 |
| LCM-13 | 14a        | 64.53 | 22.15 | 0.35 | 2.80  | 0.28 | 8.58 | 1.81 | 100.51 | 0.758 | 0.137 | 0.105 | 0.005 |
| LCM-13 | 1a         | 63.98 | 22.81 | 0.31 | 3.43  | 0.24 | 8.63 | 1.49 | 100.88 | 0.750 | 0.165 | 0.085 | 0.004 |
| LCM-13 | 1b         | 63.87 | 22.68 | 0.25 | 3.40  | 0.22 | 8.45 | 1.49 | 100.36 | 0.747 | 0.166 | 0.087 | 0.004 |
| LCM-13 | 1c         | 64.61 | 22.81 | 0.30 | 3.12  | 0.22 | 8.57 | 1.63 | 101.24 | 0.754 | 0.152 | 0.095 | 0.004 |
| LCM-13 | 2a         | 64.60 | 19.89 | 0.25 | 0.32  | 2.05 | 4.61 | 8.99 | 100.72 | 0.431 | 0.017 | 0.553 | 0.037 |
| LCM-13 | 2b         | 64.85 | 19.71 | 0.36 | 0.32  | 1.90 | 4.74 | 9.01 | 100.90 | 0.437 | 0.016 | 0.547 | 0.034 |
| LCM-13 | 2c         | 64.68 | 19.71 | 0.29 | 0.27  | 1.82 | 4.50 | 9.25 | 100.53 | 0.419 | 0.014 | 0.567 | 0.033 |
| LCM-13 | 3b         | 63.79 | 22.37 | 0.28 | 3.20  | 0.11 | 9.03 | 1.01 | 99.80  | 0.787 | 0.154 | 0.058 | 0.002 |
| LCM-13 | 4a         | 64.80 | 20.09 | 0.17 | 0.42  | 1.92 | 4.96 | 8.61 | 100.97 | 0.457 | 0.021 | 0.522 | 0.034 |
| LCM-13 | 4b         | 65.15 | 20.21 | 0.21 | 0.42  | 2.00 | 4.69 | 8.72 | 101.41 | 0.440 | 0.022 | 0.538 | 0.036 |
| LCM-13 | 4c         | 64.56 | 19.46 | 0.17 | 0.36  | 1.55 | 4.91 | 8.87 | 99.88  | 0.448 | 0.018 | 0.533 | 0.028 |
| LCM-13 | 5a         | 65.85 | 20.76 | 0.37 | 1.97  | 0.09 | 9.02 | 1.77 | 99.83  | 0.800 | 0.097 | 0.103 | 0.002 |
| LCM-13 | 5b         | 64.48 | 22.81 | 0.50 | 3.49  | 0.11 | 8.46 | 1.20 | 101.05 | 0.757 | 0.172 | 0.071 | 0.002 |
| LCM-13 | 6a         | 63.41 | 23.64 | 0.28 | 4.12  | 0.21 | 8.27 | 1.10 | 101.02 | 0.734 | 0.202 | 0.064 | 0.004 |
| LCM-13 | 6b         | 62.60 | 23.76 | 0.33 | 4.37  | 0.20 | 8.26 | 1.12 | 100.63 | 0.724 | 0.212 | 0.064 | 0.004 |
| LCM-13 | 7a         | 65.80 | 20.05 | 1.05 | 1.40  | 0.14 | 9.43 | 1.72 | 99.60  | 0.832 | 0.068 | 0.100 | 0.003 |
| LCM-13 | 7b         | 66.01 | 20.21 | 0.85 | 1.42  | 0.10 | 9.56 | 1.54 | 99.68  | 0.842 | 0.069 | 0.089 | 0.002 |
| LCM-13 | 7c         | 65.91 | 20.68 | 0.67 | 1.51  | 0.08 | 9.26 | 1.61 | 99.71  | 0.830 | 0.075 | 0.095 | 0.001 |
| LCM-13 | 8a         | 64.88 | 21.83 | 0.45 | 2.50  | 0.21 | 8.56 | 1.99 | 100.42 | 0.761 | 0.123 | 0.116 | 0.004 |
| LCM-13 | 8a         | 64.21 | 21.94 | 0.22 | 2.79  | 0.29 | 8.47 | 1.99 | 99.91  | 0.748 | 0.136 | 0.116 | 0.005 |
| LCM-13 | 9a         | 63.41 | 22.72 | 0.23 | 3.38  | 0.28 | 8.47 | 1.54 | 100.03 | 0.746 | 0.164 | 0.089 | 0.005 |
| LCM-13 | 9a         | 63.78 | 22.58 | 0.19 | 3.46  | 0.28 | 8.35 | 1.43 | 100.07 | 0.745 | 0.171 | 0.084 | 0.005 |
| LCM-13 | 9c         | 64.29 | 22.68 | 0.31 | 3.52  | 0.29 | 8.43 | 1.52 | 101.04 | 0.741 | 0.171 | 0.088 | 0.005 |
| LCM-14 | feld-1 ore | 60.92 | 24.53 | 0.22 | 6.07  | 0.02 | 7.37 | 0.64 | 99.78  | 0.661 | 0.301 | 0.038 | 0.000 |
| LCM-14 | feld2edge  | 59.09 | 25.69 | 0.37 | 7.22  | 0.06 | 6.90 | 0.45 | 99.77  | 0.617 | 0.357 | 0.026 | 0.001 |
| LCM-14 | feld2enter | 56.05 | 27.29 | 0.42 | 9.50  | 0.06 | 5.87 | 0.31 | 99.48  | 0.519 | 0.464 | 0.018 | 0.001 |
| LCM-14 | feld3edge  | 59.48 | 25.88 | 0.48 | 7.34  | 0.04 | 6.90 | 0.54 | 100.66 | 0.610 | 0.359 | 0.031 | 0.001 |
| LCM-14 | feld3enter | 59.45 | 25.66 | 0.33 | 7.20  | 0.09 | 6.78 | 0.57 | 100.07 | 0.609 | 0.357 | 0.033 | 0.002 |
| LCM-14 | feld4enter | 58.11 | 25.91 | 0.36 | 7.08  | 0.09 | 7.02 | 0.56 | 99.12  | 0.621 | 0.346 | 0.033 | 0.002 |
| LCM-14 | feld5edge  | 60.41 | 24.27 | 0.31 | 5.39  | 0.10 | 8.07 | 0.78 | 99.31  | 0.698 | 0.258 | 0.044 | 0.002 |
| LCM-14 | feld6edge  | 53.86 | 29.41 | 0.52 | 11.41 | 0.03 | 4.66 | 0.24 | 100.13 | 0.419 | 0.567 | 0.014 | 0.001 |
| LCM-14 | feld6enter | 54.15 | 28.96 | 0.61 | 11.18 | 0.04 | 4.92 | 0.27 | 100.13 | 0.436 | 0.548 | 0.016 | 0.001 |
| LCM-14 | feld7enter | 58.07 | 26.71 | 0.39 | 7.95  | 0.04 | 6.69 | 0.47 | 100.33 | 0.587 | 0.385 | 0.027 | 0.001 |
| LCM-14 | feld8edge  | 61.42 | 24.28 | 0.23 | 5.36  | 0.08 | 7.89 | 0.01 | 99.26  | 0.727 | 0.273 | 0.000 | 0.001 |
| LCM-14 | feld8enter | 58.32 | 26.38 | 0.12 | 7.67  | 0.06 | 6.72 | 0.47 | 99.75  | 0.596 | 0.376 | 0.028 | 0.001 |
| LCM-15 | 5          | 62.90 | 23.20 | 0.26 | 4.54  | 0.21 | 8.22 | 1.00 | 100.33 | 0.722 | 0.220 | 0.058 | 0.004 |
| LCM-15 | 11a        | 54.18 | 28.63 | 0.93 | 11.34 | 0.00 | 4.69 | 0.34 | 100.10 | 0.419 | 0.560 | 0.020 | 0.000 |
| LCM-15 | 11b        | 53.65 | 29.75 | 0.86 | 12.30 | 0.00 | 4.31 | 0.33 | 101.19 | 0.381 | 0.600 | 0.019 | 0.000 |
| LCM-15 | 12a        | 59.76 | 26.39 | 0.30 | 7.88  | 0.03 | 6.71 | 0.59 | 101.65 | 0.586 | 0.380 | 0.034 | 0.001 |
| LCM-15 | 12b        | 60.92 | 25.60 | 0.32 | 7.02  | 0.05 | 7.29 | 0.71 | 101.91 | 0.627 | 0.334 | 0.040 | 0.001 |
| LCM-15 | 13a        | 64.19 | 22.73 | 0.27 | 3.63  | 0.20 | 8.46 | 1.33 | 100.80 | 0.746 | 0.177 | 0.077 | 0.004 |
| LCM-15 | 5b         | 63.05 | 23.27 | 0.37 | 4.49  | 0.20 | 8.18 | 1.00 | 100.55 | 0.723 | 0.219 | 0.058 | 0.004 |
| LCM-15 | 7a         | 53.74 | 29.10 | 0.64 | 11.66 | 0.06 | 4.67 | 0.29 | 100.15 | 0.413 | 0.570 | 0.017 | 0.001 |
| LCM-15 | 7b         | 57.77 | 26.62 | 0.51 | 9.10  | 0.10 | 5.86 | 0.46 | 100.43 | 0.523 | 0.449 | 0.027 | 0.002 |
| LCM-17 |            | 62.47 | 23.60 | 0.23 | 4.92  | 0.13 | 7.94 | 0.90 | 100.20 | 0.706 | 0.242 | 0.053 | 0.002 |
| LCM-17 |            | 59.89 | 25.48 | 0.31 | 7.14  | 0.05 | 7.01 | 0.49 | 100.36 | 0.622 | 0.350 | 0.028 | 0.001 |
| LCM-17 |            | 59.14 | 25.66 | 0.33 | 7.42  | 0.11 | 6.46 | 0.89 | 100.01 | 0.580 | 0.368 | 0.052 | 0.002 |
| LCM-17 |            | 59.61 | 25.83 | 0.28 | 7.77  | 0.03 | 6.56 | 0.44 | 100.51 | 0.589 | 0.385 | 0.026 | 0.000 |

|        |    |       |       |      |       |      |      |      |        |       |       |       |       |
|--------|----|-------|-------|------|-------|------|------|------|--------|-------|-------|-------|-------|
| LCM-17 |    | 59.27 | 25.66 | 0.38 | 7.84  | 0.05 | 6.49 | 0.44 | 100.13 | 0.584 | 0.390 | 0.026 | 0.001 |
| LCM-17 |    | 58.66 | 26.07 | 0.40 | 7.97  | 0.05 | 6.51 | 0.42 | 100.08 | 0.581 | 0.394 | 0.025 | 0.001 |
| LCM-17 |    | 58.59 | 25.71 | 0.39 | 8.05  | 0.09 | 6.57 | 0.38 | 99.78  | 0.583 | 0.395 | 0.022 | 0.002 |
| LCM-17 |    | 58.92 | 26.09 | 0.25 | 8.21  | 0.05 | 6.48 | 0.44 | 100.44 | 0.573 | 0.401 | 0.026 | 0.001 |
| LCM-17 |    | 58.63 | 25.61 | 0.34 | 8.25  | 0.03 | 6.53 | 0.41 | 99.79  | 0.575 | 0.402 | 0.023 | 0.001 |
| LCM-17 |    | 58.17 | 25.92 | 0.38 | 8.32  | 0.09 | 6.32 | 0.40 | 99.61  | 0.565 | 0.411 | 0.024 | 0.002 |
| LCM-17 |    | 57.98 | 26.44 | 0.40 | 8.47  | 0.01 | 6.26 | 0.37 | 99.93  | 0.560 | 0.419 | 0.021 | 0.000 |
| LCM-17 |    | 58.36 | 26.44 | 0.52 | 8.64  | 0.07 | 6.24 | 0.37 | 100.64 | 0.554 | 0.424 | 0.022 | 0.001 |
| LCM-17 |    | 58.11 | 26.33 | 0.41 | 8.70  | 0.01 | 6.25 | 0.36 | 100.17 | 0.553 | 0.426 | 0.021 | 0.000 |
| LCM-17 |    | 57.53 | 26.30 | 0.41 | 8.70  | 0.05 | 6.20 | 0.37 | 99.56  | 0.551 | 0.427 | 0.022 | 0.001 |
| LCM-17 |    | 58.54 | 26.42 | 0.47 | 8.75  | 0.06 | 6.21 | 0.38 | 100.83 | 0.550 | 0.428 | 0.022 | 0.001 |
| LCM-17 |    | 58.08 | 26.45 | 0.39 | 8.75  | 0.05 | 6.19 | 0.38 | 100.30 | 0.549 | 0.429 | 0.022 | 0.001 |
| LCM-17 |    | 57.78 | 26.26 | 0.32 | 8.83  | 0.10 | 6.20 | 0.39 | 99.88  | 0.547 | 0.430 | 0.023 | 0.002 |
| LCM-17 |    | 58.50 | 26.74 | 0.33 | 8.84  | 0.04 | 6.16 | 0.38 | 100.99 | 0.545 | 0.433 | 0.022 | 0.001 |
| LCM-17 |    | 58.25 | 26.58 | 0.53 | 8.79  | 0.05 | 6.12 | 0.37 | 100.68 | 0.545 | 0.433 | 0.022 | 0.001 |
| LCM-17 |    | 57.16 | 26.67 | 0.39 | 8.86  | 0.08 | 6.14 | 0.36 | 99.66  | 0.545 | 0.434 | 0.021 | 0.001 |
| LCM-17 |    | 57.64 | 26.52 | 0.37 | 8.78  | 0.06 | 6.08 | 0.37 | 99.81  | 0.544 | 0.434 | 0.022 | 0.001 |
| LCM-17 |    | 57.95 | 26.33 | 0.29 | 8.86  | 0.07 | 6.09 | 0.37 | 99.97  | 0.542 | 0.436 | 0.022 | 0.001 |
| LCM-17 |    | 57.60 | 26.67 | 0.43 | 8.96  | 0.03 | 6.16 | 0.38 | 100.22 | 0.542 | 0.436 | 0.022 | 0.000 |
| LCM-17 |    | 57.97 | 26.32 | 0.42 | 8.92  | 0.07 | 6.10 | 0.36 | 100.15 | 0.541 | 0.437 | 0.021 | 0.001 |
| LCM-17 |    | 58.69 | 26.98 | 0.48 | 8.82  | 0.09 | 6.03 | 0.35 | 101.42 | 0.541 | 0.438 | 0.021 | 0.002 |
| LCM-17 |    | 57.82 | 26.70 | 0.35 | 8.91  | 0.03 | 6.08 | 0.35 | 100.23 | 0.541 | 0.438 | 0.020 | 0.001 |
| LCM-17 |    | 57.80 | 26.52 | 0.29 | 8.95  | 0.00 | 6.09 | 0.35 | 100.00 | 0.541 | 0.439 | 0.020 | 0.000 |
| LCM-17 |    | 57.53 | 26.94 | 0.43 | 8.93  | 0.01 | 6.05 | 0.38 | 100.27 | 0.539 | 0.439 | 0.022 | 0.000 |
| LCM-17 |    | 57.78 | 26.55 | 0.39 | 8.95  | 0.05 | 6.02 | 0.35 | 100.08 | 0.538 | 0.442 | 0.020 | 0.001 |
| LCM-17 |    | 57.92 | 26.52 | 0.36 | 9.04  | 0.08 | 6.06 | 0.35 | 100.33 | 0.537 | 0.443 | 0.021 | 0.001 |
| LCM-17 |    | 57.41 | 26.77 | 0.41 | 9.09  | 0.03 | 6.03 | 0.37 | 100.09 | 0.534 | 0.445 | 0.021 | 0.001 |
| LCM-17 |    | 57.52 | 26.59 | 0.43 | 8.99  | 0.07 | 5.95 | 0.35 | 99.91  | 0.534 | 0.445 | 0.021 | 0.001 |
| LCM-17 |    | 57.94 | 26.75 | 0.30 | 9.06  | 0.08 | 5.99 | 0.35 | 100.48 | 0.533 | 0.446 | 0.021 | 0.001 |
| LCM-17 |    | 57.44 | 26.92 | 0.45 | 9.08  | 0.02 | 5.99 | 0.36 | 100.25 | 0.533 | 0.446 | 0.021 | 0.000 |
| LCM-17 |    | 57.30 | 26.66 | 0.46 | 9.12  | 0.04 | 5.99 | 0.33 | 99.90  | 0.533 | 0.448 | 0.019 | 0.001 |
| LCM-17 |    | 57.45 | 26.60 | 0.40 | 9.07  | 0.05 | 5.93 | 0.35 | 99.85  | 0.531 | 0.449 | 0.020 | 0.001 |
| LCM-17 |    | 57.55 | 26.78 | 0.35 | 9.06  | 0.05 | 5.91 | 0.35 | 100.03 | 0.530 | 0.449 | 0.020 | 0.001 |
| LCM-17 |    | 57.69 | 26.88 | 0.42 | 9.22  | 0.02 | 5.99 | 0.33 | 100.55 | 0.530 | 0.451 | 0.019 | 0.000 |
| LCM-17 |    | 57.06 | 26.99 | 0.43 | 9.28  | 0.04 | 5.97 | 0.33 | 100.10 | 0.528 | 0.453 | 0.019 | 0.001 |
| LCM-17 |    | 57.46 | 27.09 | 0.41 | 9.33  | 0.01 | 5.88 | 0.35 | 100.52 | 0.522 | 0.458 | 0.020 | 0.000 |
| LCM-17 |    | 56.87 | 27.33 | 0.47 | 9.54  | 0.03 | 5.67 | 0.33 | 100.24 | 0.508 | 0.472 | 0.020 | 0.001 |
| LCM-17 |    | 57.14 | 27.61 | 0.55 | 9.57  | 0.00 | 5.59 | 0.31 | 100.78 | 0.504 | 0.477 | 0.018 | 0.000 |
| LCM-17 |    | 56.34 | 27.52 | 0.47 | 10.01 | 0.01 | 5.68 | 0.31 | 100.33 | 0.497 | 0.485 | 0.018 | 0.000 |
| LCM-17 |    | 56.30 | 27.49 | 0.39 | 9.93  | 0.01 | 5.59 | 0.30 | 100.00 | 0.496 | 0.487 | 0.018 | 0.000 |
| LCM-17 |    | 56.49 | 27.63 | 0.45 | 9.93  | 0.08 | 5.56 | 0.30 | 100.44 | 0.495 | 0.488 | 0.017 | 0.001 |
| LCM-17 |    | 56.08 | 27.98 | 0.41 | 9.93  | 0.01 | 5.50 | 0.29 | 100.19 | 0.492 | 0.491 | 0.017 | 0.000 |
| LCM-17 |    | 56.37 | 27.40 | 0.34 | 10.03 | 0.06 | 5.44 | 0.30 | 99.94  | 0.486 | 0.496 | 0.018 | 0.001 |
| LCM-17 |    | 56.02 | 27.63 | 0.36 | 10.10 | 0.02 | 5.43 | 0.28 | 99.84  | 0.485 | 0.499 | 0.017 | 0.000 |
| LCM-17 |    | 54.90 | 28.38 | 0.48 | 11.11 | 0.03 | 5.05 | 0.22 | 100.18 | 0.446 | 0.541 | 0.013 | 0.001 |
| LCM-17 |    | 54.76 | 28.29 | 0.43 | 11.21 | 0.00 | 5.08 | 0.24 | 100.00 | 0.444 | 0.542 | 0.014 | 0.000 |
| LCM-18 | 1  | 60.88 | 24.71 | 0.17 | 6.74  | 0.06 | 7.05 | 0.74 | 100.34 | 0.626 | 0.331 | 0.043 | 0.001 |
| LCM-18 | 1  | 60.80 | 25.03 | 0.26 | 6.76  | 0.01 | 6.99 | 0.75 | 100.58 | 0.623 | 0.333 | 0.044 | 0.000 |
| LCM-18 | 1  | 60.58 | 25.04 | 0.24 | 7.07  | 0.04 | 6.82 | 0.70 | 100.50 | 0.609 | 0.349 | 0.041 | 0.001 |
| LCM-18 | 2  | 54.10 | 28.50 | 0.49 | 11.58 | 0.02 | 4.79 | 0.33 | 99.80  | 0.420 | 0.561 | 0.019 | 0.000 |
| LCM-18 | 2  | 51.52 | 30.09 | 0.59 | 13.44 | 0.00 | 3.50 | 0.19 | 99.33  | 0.316 | 0.672 | 0.011 | 0.000 |
| LCM-18 | 2  | 51.31 | 30.72 | 0.47 | 13.77 | 0.01 | 3.42 | 0.17 | 99.86  | 0.307 | 0.683 | 0.010 | 0.000 |
| LCM-18 | 3  | 58.33 | 26.27 | 0.24 | 8.66  | 0.03 | 6.20 | 0.52 | 100.25 | 0.548 | 0.422 | 0.030 | 0.001 |
| LCM-18 | 3  | 57.36 | 26.66 | 0.38 | 9.28  | 0.03 | 5.79 | 0.43 | 99.92  | 0.517 | 0.458 | 0.025 | 0.000 |
| LCM-18 | 3  | 57.57 | 26.79 | 0.30 | 9.38  | 0.02 | 5.79 | 0.43 | 100.28 | 0.514 | 0.461 | 0.025 | 0.000 |
| LCM-18 | 4  | 60.82 | 24.63 | 0.23 | 6.56  | 0.04 | 7.23 | 0.82 | 100.32 | 0.635 | 0.318 | 0.047 | 0.001 |
| LCM-18 | 4  | 60.68 | 24.67 | 0.19 | 7.06  | 0.09 | 7.04 | 0.68 | 100.41 | 0.618 | 0.342 | 0.039 | 0.002 |
| LCM-18 | 4  | 60.65 | 25.15 | 0.29 | 7.08  | 0.03 | 6.82 | 0.69 | 100.70 | 0.609 | 0.350 | 0.041 | 0.000 |
| LCM-18 | 5  | 61.95 | 23.92 | 0.16 | 5.68  | 0.00 | 7.49 | 0.86 | 100.06 | 0.669 | 0.280 | 0.051 | 0.000 |
| LCM-18 | 5  | 61.89 | 24.11 | 0.22 | 5.94  | 0.04 | 7.60 | 0.88 | 100.68 | 0.663 | 0.287 | 0.051 | 0.001 |
| LCM-18 | 5  | 62.18 | 23.86 | 0.18 | 5.99  | 0.06 | 7.56 | 0.86 | 100.69 | 0.661 | 0.290 | 0.049 | 0.001 |
| LCM-18 | 6  | 63.92 | 22.92 | 0.25 | 4.34  | 0.21 | 8.63 | 0.86 | 101.12 | 0.744 | 0.207 | 0.049 | 0.004 |
| LCM-18 | 6  | 63.21 | 23.33 | 0.25 | 4.74  | 0.20 | 8.40 | 0.76 | 100.89 | 0.729 | 0.227 | 0.043 | 0.003 |
| LCM-18 | 6  | 63.16 | 23.75 | 0.19 | 5.12  | 0.13 | 8.23 | 0.71 | 101.30 | 0.714 | 0.245 | 0.041 | 0.002 |
| LCM-18 | 7  | 62.57 | 23.46 | 0.16 | 5.40  | 0.01 | 7.82 | 0.97 | 100.38 | 0.684 | 0.261 | 0.056 | 0.000 |
| LCM-18 | 7  | 62.02 | 23.87 | 0.15 | 5.58  | 0.01 | 7.55 | 0.93 | 100.10 | 0.671 | 0.274 | 0.054 | 0.000 |
| LCM-18 | 7  | 61.92 | 23.83 | 0.10 | 5.82  | 0.04 | 7.65 | 0.88 | 100.23 | 0.668 | 0.281 | 0.050 | 0.001 |
| LCM-18 | 8  | 64.75 | 22.06 | 0.31 | 3.41  | 0.34 | 8.85 | 1.14 | 100.87 | 0.771 | 0.164 | 0.065 | 0.006 |
| LCM-18 | 8  | 64.85 | 22.26 | 0.15 | 3.53  | 0.25 | 8.72 | 1.10 | 100.87 | 0.765 | 0.171 | 0.064 | 0.004 |
| LCM-18 | 8  | 64.36 | 22.20 | 0.23 | 3.70  | 0.24 | 8.93 | 1.04 | 100.69 | 0.766 | 0.176 | 0.059 | 0.004 |
| LCM-18 | 9  | 57.08 | 26.77 | 0.25 | 9.26  | 0.02 | 5.81 | 0.46 | 99.64  | 0.517 | 0.456 | 0.027 | 0.000 |
| LCM-18 | 9  | 57.30 | 26.96 | 0.39 | 9.37  | 0.09 | 5.84 | 0.44 | 100.39 | 0.516 | 0.458 | 0.026 | 0.002 |
| LCM-18 | 9  | 54.77 | 28.82 | 0.52 | 11.41 | 0.05 | 4.65 | 0.31 | 100.53 | 0.417 | 0.565 | 0.018 | 0.001 |
| LCM-18 | 10 | 61.77 | 24.24 | 0.18 | 5.93  | 0.05 | 7.63 | 0.80 | 100.59 | 0.667 | 0.287 | 0.046 | 0.001 |
| LCM-18 | 10 | 61.97 | 24.08 | 0.26 | 6.02  | 0.04 | 7.39 | 0.86 | 100.62 | 0.655 | 0.295 | 0.050 | 0.001 |
| LCM-18 | 10 | 61.34 | 24.12 | 0.29 | 6.26  | 0.03 | 7.41 | 0.83 | 100.27 | 0.650 | 0.303 | 0.048 | 0.001 |

|        |     |       |       |      |       |      |      |      |        |       |       |       |       |
|--------|-----|-------|-------|------|-------|------|------|------|--------|-------|-------|-------|-------|
| LCM-18 | 11  | 51.97 | 30.51 | 0.56 | 13.58 | 0.00 | 3.64 | 0.27 | 100.53 | 0.321 | 0.663 | 0.016 | 0.000 |
| LCM-18 | 11  | 52.08 | 30.38 | 0.58 | 13.48 | 0.02 | 3.57 | 0.28 | 100.38 | 0.319 | 0.665 | 0.017 | 0.000 |
| LCM-18 | 11  | 50.94 | 31.11 | 0.49 | 14.33 | 0.07 | 3.37 | 0.23 | 100.52 | 0.294 | 0.693 | 0.013 | 0.001 |
| LCM-20 | 8   | 61.41 | 24.10 | 0.22 | 5.57  | 0.00 | 7.33 | 0.94 | 99.56  | 0.665 | 0.279 | 0.056 | 0.000 |
| LCM-20 | 1   | 54.96 | 28.61 | 0.31 | 10.25 | 0.00 | 5.19 | 0.42 | 99.73  | 0.466 | 0.509 | 0.025 | 0.000 |
| LCM-20 | 2   | 53.70 | 28.84 | 0.42 | 11.17 | 0.02 | 4.80 | 0.31 | 99.26  | 0.429 | 0.552 | 0.018 | 0.000 |
| LCM-20 | 2   | 52.38 | 29.76 | 0.30 | 12.21 | 0.05 | 4.22 | 0.24 | 99.16  | 0.379 | 0.606 | 0.014 | 0.001 |
| LCM-20 | 4   | 55.03 | 28.46 | 0.33 | 10.18 | 0.02 | 5.17 | 0.43 | 99.62  | 0.467 | 0.508 | 0.026 | 0.000 |
| LCM-20 | 6   | 60.16 | 25.05 | 0.15 | 6.38  | 0.07 | 7.08 | 0.80 | 99.67  | 0.636 | 0.317 | 0.047 | 0.001 |
| LCM-20 | 6   | 57.96 | 25.93 | 0.22 | 7.64  | 0.06 | 6.47 | 0.62 | 98.90  | 0.583 | 0.380 | 0.037 | 0.001 |
| LCM-20 | 7   | 60.04 | 24.29 | 0.28 | 5.63  | 0.09 | 7.54 | 0.58 | 98.45  | 0.683 | 0.282 | 0.035 | 0.002 |
| LCM-20 | 8   | 58.30 | 26.24 | 0.28 | 7.60  | 0.03 | 6.49 | 0.61 | 99.55  | 0.585 | 0.379 | 0.036 | 0.001 |
| LCM-20 | 9   | 59.88 | 24.74 | 0.17 | 6.25  | 0.04 | 7.21 | 0.47 | 98.75  | 0.657 | 0.315 | 0.028 | 0.001 |
| LCM-20 | 9   | 59.71 | 25.01 | 0.23 | 6.36  | 0.08 | 7.33 | 0.45 | 99.17  | 0.658 | 0.315 | 0.027 | 0.001 |
| LCM-20 | 10  | 54.66 | 26.08 | 0.37 | 8.77  | 0.00 | 5.89 | 0.31 | 96.08  | 0.538 | 0.443 | 0.019 | 0.000 |
| LCM-22 | 10a | 60.38 | 23.92 | 0.27 | 5.13  | 0.14 | 8.25 | 0.98 | 99.08  | 0.704 | 0.241 | 0.055 | 0.002 |
| LCM-22 | 10b | 60.30 | 24.39 | 0.40 | 5.72  | 0.12 | 7.88 | 0.80 | 99.61  | 0.681 | 0.273 | 0.045 | 0.002 |
| LCM-22 | 11a | 59.69 | 25.43 | 0.47 | 6.83  | 0.11 | 6.97 | 0.76 | 100.27 | 0.620 | 0.336 | 0.045 | 0.002 |
| LCM-22 | 11b | 60.19 | 25.08 | 0.46 | 6.58  | 0.11 | 7.07 | 0.79 | 100.29 | 0.630 | 0.324 | 0.046 | 0.002 |
| LCM-22 | 12a | 63.51 | 19.78 | 0.24 | 0.31  | 2.80 | 3.97 | 9.65 | 100.25 | 0.378 | 0.016 | 0.605 | 0.051 |
| LCM-22 | 12b | 63.68 | 19.82 | 0.18 | 0.28  | 2.69 | 3.94 | 9.84 | 100.43 | 0.372 | 0.015 | 0.613 | 0.049 |
| LCM-22 | 13a | 59.00 | 25.68 | 0.35 | 6.97  | 0.07 | 7.03 | 0.68 | 99.79  | 0.620 | 0.340 | 0.040 | 0.001 |
| LCM-22 | 13b | 59.41 | 25.84 | 0.34 | 6.96  | 0.09 | 7.05 | 0.71 | 100.39 | 0.621 | 0.338 | 0.041 | 0.002 |
| LCM-22 | 14a | 62.13 | 23.92 | 0.29 | 4.76  | 0.12 | 8.05 | 1.01 | 100.27 | 0.710 | 0.232 | 0.059 | 0.002 |
| LCM-22 | 14b | 61.32 | 24.41 | 0.40 | 5.24  | 0.14 | 8.02 | 0.89 | 100.42 | 0.697 | 0.252 | 0.051 | 0.002 |
| LCM-22 | 6a  | 62.71 | 23.60 | 0.18 | 4.43  | 0.15 | 8.18 | 1.21 | 100.45 | 0.716 | 0.214 | 0.070 | 0.003 |
| LCM-22 | 6b  | 62.75 | 23.25 | 0.29 | 4.40  | 0.24 | 8.14 | 1.22 | 100.30 | 0.715 | 0.214 | 0.071 | 0.004 |
| LCM-22 | 7a  | 63.82 | 23.15 | 0.25 | 3.81  | 0.20 | 8.30 | 1.38 | 100.91 | 0.734 | 0.186 | 0.080 | 0.004 |
| LCM-22 | 7b  | 62.23 | 23.69 | 0.29 | 4.45  | 0.17 | 8.18 | 1.14 | 100.15 | 0.718 | 0.216 | 0.066 | 0.003 |
| LCM-22 | 8a  | 61.07 | 24.92 | 0.18 | 5.79  | 0.17 | 7.66 | 0.87 | 100.65 | 0.670 | 0.280 | 0.050 | 0.003 |
| LCM-22 | 8b  | 62.40 | 23.67 | 0.33 | 4.52  | 0.14 | 7.99 | 1.22 | 100.26 | 0.708 | 0.221 | 0.071 | 0.003 |
| LCM-22 | 9a  | 62.98 | 23.47 | 0.31 | 4.39  | 0.15 | 8.28 | 1.18 | 100.76 | 0.721 | 0.211 | 0.068 | 0.003 |
| LCM-22 | 9b  | 62.57 | 23.68 | 0.34 | 4.53  | 0.17 | 8.20 | 1.11 | 100.60 | 0.717 | 0.219 | 0.064 | 0.003 |
| LCM-22 |     | 57.89 | 25.83 | 0.47 | 7.63  | 0.09 | 7.15 | 0.79 | 99.84  | 0.602 | 0.355 | 0.044 | 0.001 |
| LCM-22 |     | 60.46 | 23.77 | 0.39 | 5.69  | 0.16 | 8.04 | 1.26 | 99.78  | 0.669 | 0.262 | 0.069 | 0.003 |
| LCM-22 |     | 59.97 | 24.89 | 0.46 | 6.45  | 0.14 | 7.55 | 0.81 | 100.27 | 0.648 | 0.306 | 0.046 | 0.002 |
| LCM-22 |     | 59.23 | 25.30 | 0.37 | 7.14  | 0.20 | 7.49 | 0.68 | 100.40 | 0.630 | 0.332 | 0.038 | 0.003 |
| LCM-22 |     | 63.40 | 22.51 | 0.27 | 3.70  | 0.14 | 8.90 | 1.40 | 100.32 | 0.750 | 0.173 | 0.077 | 0.002 |
| LCM-22 |     | 62.42 | 23.25 | 0.29 | 4.53  | 0.10 | 8.43 | 1.16 | 100.18 | 0.721 | 0.214 | 0.065 | 0.002 |
| LCM-22 |     | 61.95 | 24.12 | 0.28 | 4.96  | 0.13 | 8.57 | 1.02 | 101.03 | 0.715 | 0.229 | 0.056 | 0.002 |
| LCM-22 |     | 61.49 | 23.26 | 0.43 | 4.70  | 0.27 | 8.41 | 1.25 | 99.82  | 0.711 | 0.220 | 0.070 | 0.005 |
| LCM-22 |     | 62.05 | 23.40 | 0.33 | 4.74  | 0.25 | 8.27 | 1.15 | 100.18 | 0.710 | 0.225 | 0.065 | 0.004 |
| LCM-22 |     | 58.72 | 25.30 | 0.34 | 7.05  | 0.07 | 7.48 | 0.79 | 99.74  | 0.629 | 0.328 | 0.044 | 0.001 |
| LCM-22 |     | 60.77 | 24.24 | 0.43 | 5.71  | 0.17 | 7.90 | 1.07 | 100.27 | 0.672 | 0.268 | 0.060 | 0.003 |
| LCM-22 |     | 62.05 | 23.46 | 0.41 | 4.56  | 0.16 | 8.72 | 1.14 | 100.50 | 0.727 | 0.210 | 0.063 | 0.003 |
| LCM-22 |     | 61.79 | 23.04 | 0.30 | 4.67  | 0.14 | 8.38 | 1.09 | 99.40  | 0.718 | 0.221 | 0.061 | 0.002 |
| LCM-22 |     | 62.61 | 23.73 | 0.29 | 4.55  | 0.14 | 8.47 | 1.12 | 100.91 | 0.723 | 0.215 | 0.063 | 0.002 |
| LCM-22 |     | 61.95 | 22.83 | 0.35 | 4.33  | 0.17 | 8.76 | 1.11 | 99.50  | 0.737 | 0.201 | 0.062 | 0.003 |
| LCM-23 | 2   | 60.75 | 24.36 | 0.23 | 5.72  | 0.05 | 7.62 | 0.62 | 99.34  | 0.681 | 0.282 | 0.036 | 0.001 |
| LCM-23 | 2   | 60.75 | 24.18 | 0.16 | 5.85  | 0.07 | 7.44 | 0.62 | 99.07  | 0.672 | 0.292 | 0.037 | 0.001 |
| LCM-23 | 3   | 61.20 | 23.89 | 0.26 | 5.02  | 0.12 | 7.84 | 0.75 | 99.06  | 0.706 | 0.250 | 0.045 | 0.002 |
| LCM-23 | 3   | 61.50 | 23.91 | 0.19 | 5.02  | 0.18 | 7.76 | 0.76 | 99.31  | 0.703 | 0.251 | 0.045 | 0.003 |
| LCM-23 | 6   | 58.42 | 26.19 | 0.29 | 7.94  | 0.07 | 6.52 | 0.42 | 99.85  | 0.583 | 0.392 | 0.025 | 0.001 |
| LCM-23 | 7   | 61.50 | 23.65 | 0.11 | 5.42  | 0.07 | 7.70 | 0.66 | 99.11  | 0.692 | 0.269 | 0.039 | 0.001 |
| LCM-23 | 7   | 61.54 | 23.89 | 0.16 | 5.55  | 0.03 | 7.74 | 0.66 | 99.56  | 0.688 | 0.273 | 0.039 | 0.001 |
| LCM-23 | 7   | 61.20 | 24.55 | 0.19 | 5.66  | 0.08 | 7.68 | 0.62 | 99.98  | 0.685 | 0.279 | 0.036 | 0.002 |
| LCM-23 |     | 67.04 | 19.20 | 0.45 | 0.15  | 0.00 | 6.75 | 6.60 | 100.18 | 0.604 | 0.008 | 0.389 | 0.000 |
| LCM-23 |     | 66.14 | 19.08 | 0.41 | 0.16  | 0.01 | 6.90 | 6.71 | 99.40  | 0.605 | 0.008 | 0.387 | 0.000 |
| LCM-26 | 1   | 61.35 | 24.07 | 0.18 | 5.59  | 0.09 | 7.40 | 1.04 | 99.71  | 0.662 | 0.276 | 0.061 | 0.002 |
| LCM-26 | 1   | 60.34 | 24.61 | 0.36 | 6.91  | 0.10 | 6.93 | 0.81 | 100.06 | 0.614 | 0.338 | 0.047 | 0.002 |
| LCM-26 | 1   | 59.71 | 24.84 | 0.27 | 7.10  | 0.08 | 6.84 | 0.80 | 99.64  | 0.606 | 0.348 | 0.047 | 0.002 |
| LCM-26 | 2   | 61.57 | 23.58 | 0.42 | 5.94  | 0.11 | 7.48 | 1.01 | 100.11 | 0.655 | 0.287 | 0.058 | 0.002 |
| LCM-26 | 2   | 61.61 | 23.96 | 0.22 | 6.09  | 0.18 | 7.60 | 0.94 | 100.60 | 0.656 | 0.290 | 0.053 | 0.003 |
| LCM-26 | 2   | 61.36 | 23.87 | 0.48 | 6.03  | 0.14 | 7.40 | 1.05 | 100.33 | 0.648 | 0.292 | 0.060 | 0.002 |
| LCM-26 | 3   | 61.31 | 23.33 | 0.36 | 5.85  | 0.12 | 7.44 | 1.08 | 99.49  | 0.654 | 0.284 | 0.062 | 0.002 |
| LCM-26 | 3   | 61.78 | 23.97 | 0.38 | 5.96  | 0.14 | 7.47 | 1.00 | 100.70 | 0.654 | 0.288 | 0.058 | 0.002 |
| LCM-26 | 3   | 60.87 | 23.61 | 0.31 | 6.04  | 0.09 | 7.25 | 1.01 | 99.18  | 0.644 | 0.297 | 0.059 | 0.002 |
| LCM-26 | 4   | 63.38 | 22.91 | 0.43 | 4.50  | 0.15 | 8.34 | 0.99 | 100.71 | 0.727 | 0.217 | 0.057 | 0.003 |
| LCM-26 | 4   | 62.71 | 23.18 | 0.38 | 5.07  | 0.11 | 8.25 | 0.84 | 100.53 | 0.711 | 0.241 | 0.048 | 0.002 |
| LCM-26 | 4   | 62.37 | 23.31 | 0.20 | 5.11  | 0.11 | 8.09 | 0.84 | 100.03 | 0.706 | 0.246 | 0.048 | 0.002 |
| LCM-26 | 5   | 62.29 | 23.40 | 0.30 | 5.25  | 0.17 | 8.38 | 0.83 | 100.62 | 0.708 | 0.245 | 0.046 | 0.003 |
| LCM-26 | 5   | 62.33 | 23.80 | 0.26 | 5.32  | 0.18 | 8.06 | 0.79 | 100.74 | 0.699 | 0.255 | 0.045 | 0.003 |
| LCM-26 | 5   | 62.13 | 23.78 | 0.17 | 5.57  | 0.13 | 7.79 | 0.76 | 100.32 | 0.685 | 0.271 | 0.044 | 0.002 |
| LCM-26 | 6   | 62.55 | 23.46 | 0.30 | 5.29  | 0.13 | 7.78 | 0.87 | 100.38 | 0.690 | 0.259 | 0.050 | 0.002 |

|        |     |       |       |      |      |      |      |       |        |       |       |       |       |
|--------|-----|-------|-------|------|------|------|------|-------|--------|-------|-------|-------|-------|
| LCM-26 | 6   | 62.14 | 23.80 | 0.35 | 5.55 | 0.05 | 7.97 | 0.86  | 100.71 | 0.687 | 0.265 | 0.049 | 0.001 |
| LCM-26 | 6   | 61.90 | 24.35 | 0.29 | 6.07 | 0.10 | 7.63 | 0.68  | 101.01 | 0.668 | 0.293 | 0.039 | 0.002 |
| LCM-26 | 7   | 62.51 | 23.53 | 0.32 | 5.34 | 0.14 | 7.83 | 1.24  | 100.91 | 0.675 | 0.254 | 0.070 | 0.002 |
| LCM-26 | 7   | 62.48 | 23.67 | 0.30 | 5.28 | 0.14 | 7.67 | 1.26  | 100.79 | 0.672 | 0.256 | 0.073 | 0.002 |
| LCM-26 | 7   | 61.98 | 23.56 | 0.40 | 5.55 | 0.15 | 7.52 | 1.24  | 100.40 | 0.659 | 0.269 | 0.071 | 0.003 |
| LCM-26 | 8   | 61.95 | 23.70 | 0.37 | 5.50 | 0.17 | 7.72 | 1.16  | 100.57 | 0.670 | 0.264 | 0.066 | 0.003 |
| LCM-26 | 8   | 62.09 | 23.36 | 0.33 | 5.60 | 0.12 | 7.58 | 1.14  | 100.21 | 0.664 | 0.271 | 0.065 | 0.002 |
| LCM-26 | 8   | 62.19 | 23.72 | 0.31 | 5.56 | 0.14 | 7.43 | 1.12  | 100.48 | 0.661 | 0.273 | 0.066 | 0.003 |
| LCM-26 | 9   | 58.04 | 27.06 | 0.49 | 9.19 | 0.07 | 6.12 | 0.55  | 101.51 | 0.529 | 0.439 | 0.031 | 0.001 |
| LCM-26 | 9   | 57.47 | 26.71 | 0.44 | 9.17 | 0.08 | 5.80 | 0.50  | 100.17 | 0.518 | 0.452 | 0.030 | 0.001 |
| LCM-26 | 9   | 56.88 | 27.27 | 0.39 | 9.52 | 0.02 | 5.75 | 0.48  | 100.30 | 0.508 | 0.464 | 0.028 | 0.000 |
| LCM-26 | 10  | 62.61 | 23.39 | 0.33 | 4.82 | 0.20 | 8.06 | 0.99  | 100.39 | 0.709 | 0.234 | 0.057 | 0.004 |
| LCM-26 | 10  | 62.85 | 22.89 | 0.19 | 4.80 | 0.19 | 7.98 | 1.03  | 99.93  | 0.706 | 0.234 | 0.060 | 0.003 |
| LCM-26 | 10  | 62.69 | 22.89 | 0.34 | 4.95 | 0.16 | 7.86 | 1.00  | 99.88  | 0.699 | 0.243 | 0.058 | 0.003 |
| LCM-26 | 11  | 64.70 | 18.93 | 0.16 | 0.26 | 1.96 | 3.92 | 10.15 | 100.09 | 0.365 | 0.014 | 0.621 | 0.036 |
| LCM-26 | 11  | 63.78 | 18.94 | 0.27 | 0.30 | 2.33 | 3.83 | 10.00 | 99.44  | 0.362 | 0.015 | 0.622 | 0.043 |
| LCM-26 | 11  | 64.23 | 21.63 | 0.21 | 3.29 | 0.15 | 8.38 | 1.41  | 99.29  | 0.753 | 0.164 | 0.083 | 0.003 |
| LCM-27 | 10a | 60.90 | 25.44 | 0.34 | 5.93 | 0.13 | 7.88 | 0.69  | 101.30 | 0.679 | 0.282 | 0.039 | 0.002 |
| LCM-27 | 10b | 60.05 | 26.17 | 0.22 | 6.94 | 0.12 | 7.42 | 0.56  | 101.47 | 0.638 | 0.330 | 0.032 | 0.002 |
| LCM-27 | 11a | 67.77 | 19.22 | 0.66 | 0.09 | 0.00 | 7.55 | 6.31  | 101.59 | 0.642 | 0.004 | 0.353 | 0.000 |
| LCM-27 | 11b | 68.00 | 19.10 | 0.55 | 0.12 | 0.05 | 7.64 | 5.82  | 101.29 | 0.662 | 0.006 | 0.332 | 0.001 |
| LCM-27 | 1a  | 57.88 | 27.35 | 0.25 | 8.46 | 0.11 | 6.58 | 0.41  | 101.03 | 0.571 | 0.406 | 0.023 | 0.002 |
| LCM-27 | 1b  | 60.46 | 25.86 | 0.22 | 6.45 | 0.10 | 7.65 | 0.60  | 101.33 | 0.659 | 0.307 | 0.034 | 0.002 |
| LCM-27 | 4a  | 65.05 | 22.38 | 0.29 | 2.92 | 0.16 | 9.24 | 1.49  | 101.51 | 0.781 | 0.136 | 0.083 | 0.003 |
| LCM-27 | 4b  | 65.04 | 21.72 | 0.25 | 2.74 | 0.07 | 9.02 | 1.59  | 100.43 | 0.779 | 0.131 | 0.090 | 0.001 |
| LCM-27 | 5a  | 63.03 | 22.94 | 0.30 | 4.04 | 0.14 | 8.61 | 1.04  | 100.09 | 0.747 | 0.194 | 0.059 | 0.002 |
| LCM-27 | 5b  | 63.45 | 23.00 | 0.24 | 4.11 | 0.16 | 8.73 | 1.01  | 100.70 | 0.748 | 0.195 | 0.057 | 0.003 |
| LCM-27 | 6a  | 67.65 | 19.40 | 0.35 | 0.22 | 0.14 | 7.45 | 6.32  | 101.53 | 0.635 | 0.010 | 0.355 | 0.002 |
| LCM-27 | 7a  | 60.06 | 25.67 | 0.36 | 6.70 | 0.13 | 7.27 | 0.76  | 100.95 | 0.634 | 0.323 | 0.044 | 0.002 |
| LCM-27 | 7b  | 59.45 | 25.71 | 0.32 | 7.11 | 0.09 | 7.07 | 0.73  | 100.48 | 0.616 | 0.342 | 0.042 | 0.002 |
| LCM-27 | 8a  | 67.86 | 19.38 | 0.33 | 0.26 | 0.00 | 7.72 | 5.88  | 101.44 | 0.658 | 0.012 | 0.330 | 0.000 |
| LCM-27 | 8b  | 67.39 | 19.69 | 0.28 | 0.25 | 0.04 | 7.90 | 5.93  | 101.48 | 0.661 | 0.012 | 0.327 | 0.001 |
| LCM-27 | 9a  | 64.79 | 21.78 | 0.21 | 2.68 | 0.12 | 9.13 | 1.59  | 100.30 | 0.783 | 0.127 | 0.090 | 0.002 |
| LCM-27 |     | 68.17 | 18.74 | 0.46 | 0.16 | 0.00 | 6.78 | 6.66  | 100.97 | 0.602 | 0.008 | 0.390 | 0.000 |
| LCM-27 |     | 67.81 | 18.74 | 0.45 | 0.17 | 0.00 | 7.03 | 6.15  | 100.34 | 0.629 | 0.008 | 0.362 | 0.000 |
| LCM-27 |     | 67.90 | 18.59 | 0.43 | 0.18 | 0.01 | 6.97 | 6.53  | 100.60 | 0.614 | 0.009 | 0.378 | 0.000 |
| LCM-27 |     | 67.61 | 18.67 | 0.43 | 0.18 | 0.01 | 6.89 | 6.49  | 100.27 | 0.612 | 0.009 | 0.380 | 0.000 |
| LCM-27 |     | 68.69 | 18.84 | 0.37 | 0.18 | 0.01 | 6.62 | 6.60  | 101.30 | 0.599 | 0.009 | 0.392 | 0.000 |
| LCM-27 |     | 67.57 | 18.57 | 0.36 | 0.19 | 0.00 | 7.26 | 6.09  | 100.03 | 0.638 | 0.009 | 0.353 | 0.000 |
| LCM-27 |     | 67.60 | 18.58 | 0.35 | 0.19 | 0.06 | 6.70 | 6.70  | 100.16 | 0.598 | 0.009 | 0.393 | 0.001 |
| LCM-27 |     | 67.61 | 18.57 | 0.42 | 0.19 | 0.02 | 6.72 | 6.68  | 100.22 | 0.599 | 0.009 | 0.392 | 0.000 |
| LCM-27 |     | 67.15 | 18.89 | 0.34 | 0.20 | 0.00 | 6.92 | 6.53  | 100.02 | 0.611 | 0.010 | 0.379 | 0.000 |
| LCM-27 |     | 67.76 | 18.70 | 0.38 | 0.21 | 0.02 | 6.95 | 6.40  | 100.41 | 0.617 | 0.010 | 0.373 | 0.000 |
| LCM-27 |     | 67.45 | 18.87 | 0.22 | 0.30 | 0.18 | 6.77 | 6.47  | 100.26 | 0.605 | 0.015 | 0.381 | 0.003 |
| LCM-27 |     | 65.53 | 21.23 | 0.26 | 2.49 | 0.12 | 8.70 | 1.81  | 100.13 | 0.772 | 0.122 | 0.106 | 0.002 |
| LCM-27 |     | 65.54 | 21.19 | 0.28 | 2.50 | 0.14 | 8.74 | 1.80  | 100.18 | 0.773 | 0.122 | 0.105 | 0.002 |
| LCM-27 |     | 65.35 | 21.35 | 0.21 | 2.51 | 0.14 | 8.75 | 1.81  | 100.11 | 0.773 | 0.122 | 0.105 | 0.002 |
| LCM-27 |     | 65.79 | 20.97 | 0.18 | 2.51 | 0.13 | 8.61 | 1.86  | 100.03 | 0.768 | 0.124 | 0.109 | 0.002 |
| LCM-27 |     | 65.46 | 21.36 | 0.26 | 2.59 | 0.11 | 8.68 | 1.81  | 100.27 | 0.768 | 0.127 | 0.105 | 0.002 |
| LCM-27 |     | 64.07 | 22.12 | 0.20 | 3.79 | 0.04 | 8.53 | 0.98  | 99.73  | 0.757 | 0.186 | 0.057 | 0.001 |
| LCM-27 |     | 63.75 | 22.07 | 0.34 | 3.79 | 0.13 | 8.30 | 1.11  | 99.49  | 0.746 | 0.188 | 0.066 | 0.002 |
| LCM-27 |     | 64.05 | 22.56 | 0.32 | 3.97 | 0.08 | 8.49 | 1.08  | 100.54 | 0.745 | 0.193 | 0.062 | 0.001 |
| LCM-27 |     | 63.24 | 22.59 | 0.22 | 4.06 | 0.11 | 8.29 | 1.02  | 99.53  | 0.740 | 0.200 | 0.060 | 0.002 |
| LCM-27 |     | 62.67 | 22.77 | 0.30 | 4.37 | 0.12 | 8.19 | 0.91  | 99.33  | 0.731 | 0.216 | 0.053 | 0.002 |
| LCM-27 |     | 63.21 | 22.98 | 0.25 | 4.37 | 0.17 | 8.08 | 1.05  | 100.11 | 0.722 | 0.216 | 0.062 | 0.003 |
| LCM-27 |     | 63.41 | 22.90 | 0.21 | 4.47 | 0.17 | 8.15 | 0.95  | 100.27 | 0.725 | 0.220 | 0.055 | 0.003 |
| LCM-27 |     | 63.24 | 23.38 | 0.28 | 4.57 | 0.16 | 8.16 | 0.94  | 100.74 | 0.722 | 0.223 | 0.055 | 0.003 |
| LCM-27 |     | 62.45 | 22.83 | 0.38 | 4.62 | 0.15 | 8.10 | 0.89  | 99.42  | 0.721 | 0.227 | 0.052 | 0.003 |
| LCM-27 |     | 62.68 | 23.09 | 0.31 | 4.68 | 0.18 | 8.03 | 0.89  | 99.87  | 0.717 | 0.231 | 0.052 | 0.003 |
| LCM-27 |     | 63.24 | 23.43 | 0.20 | 4.70 | 0.14 | 8.00 | 0.93  | 100.64 | 0.714 | 0.232 | 0.055 | 0.002 |
| LCM-27 |     | 62.73 | 22.95 | 0.32 | 4.67 | 0.17 | 7.94 | 0.91  | 99.68  | 0.714 | 0.232 | 0.054 | 0.003 |
| LCM-27 |     | 63.18 | 23.44 | 0.21 | 4.70 | 0.11 | 7.83 | 0.95  | 100.42 | 0.708 | 0.235 | 0.057 | 0.002 |
| LCM-27 |     | 63.83 | 23.48 | 0.31 | 4.74 | 0.12 | 7.84 | 0.85  | 101.18 | 0.711 | 0.238 | 0.051 | 0.002 |
| LCM-27 |     | 64.00 | 23.49 | 0.21 | 4.73 | 0.10 | 7.73 | 0.87  | 101.12 | 0.708 | 0.239 | 0.052 | 0.002 |
| LCM-27 |     | 63.19 | 23.39 | 0.26 | 4.94 | 0.12 | 7.92 | 0.81  | 100.63 | 0.708 | 0.244 | 0.048 | 0.002 |
| LCM-27 |     | 63.39 | 23.88 | 0.25 | 5.03 | 0.14 | 7.62 | 0.84  | 101.15 | 0.696 | 0.254 | 0.050 | 0.003 |
| LCM-27 |     | 62.31 | 23.50 | 0.35 | 5.26 | 0.11 | 7.76 | 0.89  | 100.18 | 0.689 | 0.258 | 0.052 | 0.002 |
| LCM-27 |     | 61.87 | 23.59 | 0.25 | 5.29 | 0.15 | 7.66 | 0.75  | 99.56  | 0.692 | 0.264 | 0.044 | 0.003 |
| LCM-27 |     | 61.72 | 23.56 | 0.33 | 5.47 | 0.12 | 7.74 | 0.80  | 99.74  | 0.686 | 0.268 | 0.046 | 0.002 |
| LCM-27 |     | 61.58 | 24.01 | 0.22 | 5.46 | 0.10 | 7.69 | 0.73  | 99.79  | 0.687 | 0.270 | 0.043 | 0.002 |
| LCM-27 |     | 61.67 | 24.08 | 0.23 | 5.57 | 0.10 | 7.54 | 0.73  | 99.92  | 0.680 | 0.277 | 0.043 | 0.002 |
| LCM-27 |     | 61.41 | 23.97 | 0.32 | 5.61 | 0.11 | 7.43 | 0.76  | 99.59  | 0.674 | 0.281 | 0.045 | 0.002 |
| LCM-27 |     | 60.17 | 24.54 | 0.18 | 6.55 | 0.13 | 7.43 | 0.57  | 99.57  | 0.650 | 0.317 | 0.033 | 0.002 |
| LCM-27 |     | 60.47 | 24.65 | 0.39 | 6.45 | 0.15 | 7.21 | 0.64  | 99.94  | 0.644 | 0.318 | 0.037 | 0.003 |

|        |        |       |       |             |             |      |       |       |        |       |       |       |       |
|--------|--------|-------|-------|-------------|-------------|------|-------|-------|--------|-------|-------|-------|-------|
| LCM-27 |        | 59.70 | 25.03 | 0.30        | 6.86        | 0.09 | 7.03  | 0.58  | 99.58  | 0.627 | 0.339 | 0.034 | 0.002 |
| LCM-27 |        | 59.28 | 25.08 | 0.45        | 7.37        | 0.12 | 6.72  | 0.61  | 99.62  | 0.600 | 0.364 | 0.036 | 0.002 |
| LCM-27 |        | 59.25 | 25.79 | 0.23        | 7.88        | 0.00 | 6.48  | 0.45  | 100.08 | 0.582 | 0.391 | 0.027 | 0.000 |
| LCM-27 |        | 57.74 | 26.27 | 0.24        | 8.61        | 0.09 | 6.18  | 0.37  | 99.49  | 0.553 | 0.426 | 0.022 | 0.002 |
| LCM-27 |        | 56.51 | 27.17 | 0.26        | 9.22        | 0.07 | 5.84  | 0.35  | 99.42  | 0.523 | 0.456 | 0.021 | 0.001 |
| LCM-27 |        | 55.99 | 28.02 | 0.30        | 10.03       | 0.05 | 5.37  | 0.29  | 100.04 | 0.483 | 0.499 | 0.017 | 0.001 |
| LCM-27 |        | 55.79 | 27.77 | 0.51        | 10.19       | 0.05 | 5.26  | 0.29  | 99.87  | 0.474 | 0.508 | 0.017 | 0.001 |
| LCM-29 | 1      | 66.82 | 19.67 | 0.07        | 0.30        | 0.00 | 11.62 | 0.16  | 98.64  | 0.978 | 0.014 | 0.009 | 0.000 |
| LCM-29 | 1      | 67.01 | 20.37 | 0.00        | 0.46        | 0.02 | 11.63 | 0.11  | 99.59  | 0.973 | 0.021 | 0.006 | 0.000 |
| LCM-29 | 1      | 67.70 | 20.70 | 0.00        | 0.47        | 0.03 | 11.61 | 0.11  | 100.62 | 0.972 | 0.022 | 0.006 | 0.001 |
| LCM-29 | 2      | 68.01 | 19.73 | 0.16        | 0.08        | 0.00 | 11.85 | 0.08  | 99.90  | 0.992 | 0.004 | 0.004 | 0.000 |
| LCM-29 | 2      | 67.36 | 20.04 | 0.10        | 0.24        | 0.00 | 11.80 | 0.09  | 99.63  | 0.984 | 0.011 | 0.005 | 0.000 |
| LCM-29 | 3      | 68.16 | 20.09 | 0.09        | 0.04        | 0.00 | 11.86 | 0.07  | 100.32 | 0.994 | 0.002 | 0.004 | 0.000 |
| LCM-29 | 3      | 67.98 | 19.79 | 0.06        | 0.04        | 0.04 | 11.98 | 0.14  | 100.01 | 0.991 | 0.002 | 0.008 | 0.001 |
| LCM-29 | 3      | 67.79 | 19.68 | 0.05        | 0.04        | 0.14 | 11.86 | 0.11  | 99.67  | 0.992 | 0.002 | 0.006 | 0.002 |
| LCM-29 | 4      | 68.38 | 19.70 | 0.00        | 0.02        | 0.00 | 11.80 | 0.13  | 100.03 | 0.992 | 0.001 | 0.007 | 0.000 |
| LCM-29 | 4      | 67.64 | 20.18 | 0.00        | 0.11        | 0.00 | 11.68 | 0.08  | 99.68  | 0.990 | 0.005 | 0.004 | 0.000 |
| LCM-29 | 4      | 67.23 | 19.99 | 0.04        | 0.16        | 0.01 | 11.76 | 0.31  | 99.49  | 0.976 | 0.007 | 0.017 | 0.000 |
| LCM-29 | 5      | 68.14 | 19.88 | 0.20        | 0.03        | 0.00 | 12.01 | 0.11  | 100.37 | 0.993 | 0.001 | 0.006 | 0.000 |
| LCM-29 | 5      | 67.59 | 19.82 | 0.07        | 0.05        | 0.05 | 11.84 | 0.03  | 99.44  | 0.996 | 0.002 | 0.002 | 0.001 |
| LCM-29 | 5      | 67.03 | 19.69 | 0.27        | 0.49        | 0.12 | 11.72 | 0.06  | 99.38  | 0.975 | 0.022 | 0.003 | 0.002 |
| LCM-29 | 6      | 67.44 | 19.39 | 0.31        | 0.06        | 0.68 | 11.52 | 0.34  | 99.74  | 0.978 | 0.003 | 0.019 | 0.012 |
| LCM-29 | 7      | 67.81 | 19.91 | 0.06        | 0.40        | 0.00 | 11.76 | 0.08  | 100.03 | 0.977 | 0.018 | 0.005 | 0.000 |
| LCM-29 | 7      | 67.28 | 20.01 | 0.08        | 0.60        | 0.03 | 11.54 | 0.16  | 99.70  | 0.964 | 0.028 | 0.009 | 0.001 |
| LCM-29 | 7      | 67.59 | 19.54 | 0.08        | 0.63        | 0.05 | 11.80 | 0.12  | 99.82  | 0.965 | 0.029 | 0.007 | 0.001 |
| LCM-29 | 8      | 63.36 | 18.79 | 0.00        | 0.00        | 0.32 | 0.45  | 16.37 | 99.30  | 0.040 | 0.000 | 0.960 | 0.006 |
| LCM-29 | 8      | 68.28 | 20.17 | 0.02        | 0.06        | 0.00 | 11.86 | 0.08  | 100.46 | 0.993 | 0.003 | 0.004 | 0.000 |
| LCM-29 | 8      | 67.39 | 20.00 | 0.00        | 0.07        | 0.05 | 11.96 | 0.08  | 99.54  | 0.992 | 0.003 | 0.005 | 0.001 |
| LCM-29 | 9      | 65.95 | 20.34 | 0.15        | 1.09        | 0.02 | 10.59 | 0.86  | 99.01  | 0.901 | 0.051 | 0.048 | 0.000 |
| LCM-29 | 9      | 66.32 | 20.50 | 0.14        | 1.28        | 0.00 | 10.43 | 0.79  | 99.46  | 0.895 | 0.061 | 0.045 | 0.000 |
| LCM-29 | 10     | 65.05 | 19.34 | 0.30        | 0.31        | 0.62 | 3.77  | 11.17 | 100.56 | 0.334 | 0.015 | 0.651 | 0.011 |
| LCM-29 | 10     | 64.51 | 19.46 | 0.17        | 0.37        | 0.71 | 3.76  | 11.00 | 99.98  | 0.336 | 0.018 | 0.646 | 0.013 |
| LCM-29 | 10     | 64.78 | 19.65 | 0.20        | 0.39        | 0.74 | 3.75  | 11.01 | 100.53 | 0.334 | 0.019 | 0.646 | 0.013 |
| LCM-29 |        | 59.70 | 25.06 | 0.24        | 6.09        | 0.14 | 8.09  | 0.63  | 99.95  | 0.682 | 0.283 | 0.035 | 0.002 |
| LCM-29 |        | 59.94 | 25.49 | 0.32        | 6.41        | 0.14 | 7.64  | 0.60  | 100.54 | 0.660 | 0.306 | 0.034 | 0.002 |
| LCM-29 |        | 58.42 | 26.05 | 0.30        | 7.55        | 0.00 | 7.22  | 0.49  | 100.04 | 0.616 | 0.356 | 0.027 | 0.000 |
| LCM-29 |        | 57.76 | 26.66 | 0.36        | 8.18        | 0.08 | 6.92  | 0.42  | 100.38 | 0.591 | 0.386 | 0.024 | 0.001 |
| LCM-29 |        | 58.44 | 26.45 | 0.40        | 7.91        | 0.08 | 6.92  | 0.60  | 100.80 | 0.592 | 0.374 | 0.034 | 0.001 |
| LCM-29 |        | 59.21 | 25.01 | 0.33        | 6.59        | 0.08 | 7.79  | 0.78  | 99.78  | 0.652 | 0.305 | 0.043 | 0.001 |
| LCM-29 |        | 60.16 | 25.34 | 0.27        | 6.22        | 0.10 | 7.78  | 0.62  | 100.49 | 0.669 | 0.296 | 0.035 | 0.002 |
| LCM-29 |        | 59.38 | 25.48 | 0.27        | 6.46        | 0.11 | 7.98  | 0.60  | 100.28 | 0.668 | 0.299 | 0.033 | 0.002 |
| LCM-29 |        | 55.80 | 27.62 | 0.24        | 8.93        | 0.03 | 6.23  | 0.45  | 99.29  | 0.544 | 0.431 | 0.026 | 0.001 |
| LCM-29 |        | 57.04 | 27.46 | 0.31        | 8.89        | 0.04 | 6.20  | 0.37  | 100.30 | 0.546 | 0.433 | 0.022 | 0.001 |
| LCM-29 |        | 57.97 | 26.49 | 0.30        | 7.34        | 0.03 | 7.04  | 0.47  | 99.64  | 0.617 | 0.356 | 0.027 | 0.001 |
| LCM-29 |        | 58.67 | 25.97 | 0.43        | 7.18        | 0.11 | 7.32  | 0.54  | 100.22 | 0.629 | 0.341 | 0.030 | 0.002 |
| LCM-29 |        | 58.79 | 26.18 | 0.37        | 7.38        | 0.07 | 7.21  | 0.51  | 100.51 | 0.620 | 0.351 | 0.029 | 0.001 |
| LCM-29 |        | 59.82 | 25.22 | 0.27        | 6.28        | 0.10 | 7.72  | 0.61  | 100.03 | 0.666 | 0.300 | 0.034 | 0.002 |
| LCM-29 |        | 55.27 | 27.76 | 0.34        | 9.10        | 0.02 | 6.38  | 0.36  | 99.22  | 0.548 | 0.432 | 0.021 | 0.000 |
| LCM-29 |        | 56.23 | 27.10 | 0.31        | 8.91        | 0.02 | 6.35  | 0.34  | 99.25  | 0.552 | 0.428 | 0.020 | 0.000 |
| LCM-29 |        | 58.75 | 25.84 | 0.20        | 6.81        | 0.07 | 7.47  | 0.54  | 99.67  | 0.645 | 0.325 | 0.031 | 0.001 |
| LCM-29 |        | 59.13 | 25.33 | 0.17        | 6.92        | 0.06 | 7.36  | 0.51  | 99.47  | 0.639 | 0.332 | 0.029 | 0.001 |
| LCM-31 | 10a    | 60.77 | 25.20 | 0.27        | 6.08        | 0.08 | 7.66  | 0.55  | 100.61 | 0.673 | 0.295 | 0.032 | 0.001 |
| LCM-31 | 10b    | 60.53 | 25.99 | 0.38        | 6.78        | 0.05 | 7.25  | 0.48  | 101.46 | 0.641 | 0.331 | 0.028 | 0.001 |
| LCM-31 | 11a    | 59.53 | 25.95 | 0.20        | 7.13        | 0.05 | 7.26  | 0.45  | 100.56 | 0.631 | 0.343 | 0.026 | 0.001 |
| LCM-31 | 11b    | 58.66 | 26.65 | 0.22        | 7.66        | 0.00 | 6.90  | 0.42  | 100.50 | 0.605 | 0.371 | 0.024 | 0.000 |
| LCM-31 | 1a     | 58.21 | 26.68 | 0.31        | 7.85        | 0.04 | 6.63  | 0.43  | 100.14 | 0.589 | 0.385 | 0.025 | 0.001 |
| LCM-31 | 1b     | 58.54 | 26.75 | 0.21        | 7.95        | 0.09 | 6.67  | 0.46  | 100.66 | 0.587 | 0.387 | 0.026 | 0.002 |
| LCM-31 | 2a     | 60.69 | 25.47 | 0.26        | 6.29        | 0.04 | 7.66  | 0.51  | 100.93 | 0.668 | 0.303 | 0.029 | 0.001 |
| LCM-31 | 2b     | 60.69 | 25.42 | 0.23        | 6.18        | 0.05 | 7.71  | 0.54  | 100.81 | 0.672 | 0.297 | 0.031 | 0.001 |
| LCM-31 | 3a     | 60.16 | 25.85 | 0.18        | 6.79        | 0.07 | 7.25  | 0.45  | 100.76 | 0.642 | 0.332 | 0.026 | 0.001 |
| LCM-31 | 3b     | 59.55 | 25.51 | 0.23        | 6.80        | 0.07 | 7.30  | 0.44  | 99.89  | 0.643 | 0.331 | 0.026 | 0.001 |
| LCM-31 | feld4a | 65.02 | 19.35 | <b>0.04</b> | <b>0.01</b> | 0.13 | 1.19  | 15.07 | 100.81 | 0.107 | 0.000 | 0.892 | 0.002 |
| LCM-31 |        | 57.85 | 25.55 | 0.41        | 7.75        | 0.21 | 7.17  | 0.68  | 99.61  | 0.603 | 0.360 | 0.038 | 0.003 |
| LCM-31 |        | 58.56 | 25.91 | 0.36        | 7.52        | 0.14 | 7.11  | 0.66  | 100.27 | 0.608 | 0.355 | 0.037 | 0.002 |
| LCM-31 |        | 61.46 | 23.48 | 0.32        | 4.67        | 0.21 | 8.60  | 0.99  | 99.74  | 0.727 | 0.218 | 0.055 | 0.004 |
| LCM-31 |        | 59.88 | 25.37 | 0.28        | 6.75        | 0.06 | 7.46  | 0.75  | 100.55 | 0.638 | 0.319 | 0.042 | 0.001 |
| LCM-31 |        | 59.72 | 25.33 | 0.33        | 6.75        | 0.05 | 7.70  | 0.78  | 100.65 | 0.645 | 0.312 | 0.043 | 0.001 |
| LCM-31 |        | 66.33 | 19.19 | 0.43        | 0.19        | 0.00 | 7.49  | 6.50  | 100.13 | 0.631 | 0.009 | 0.360 | 0.000 |
| LCM-31 |        | 66.55 | 19.14 | 0.47        | 0.16        | 0.05 | 7.00  | 6.83  | 100.19 | 0.604 | 0.007 | 0.388 | 0.001 |
| LCM-31 |        | 61.48 | 24.06 | 0.39        | 5.27        | 0.07 | 8.02  | 0.80  | 100.09 | 0.700 | 0.254 | 0.046 | 0.001 |
| LCM-31 |        | 61.28 | 24.07 | 0.37        | 4.96        | 0.21 | 8.50  | 0.97  | 100.37 | 0.715 | 0.231 | 0.054 | 0.004 |
| LCM-31 |        | 61.69 | 22.86 | 0.28        | 4.17        | 0.17 | 8.86  | 1.11  | 99.14  | 0.745 | 0.194 | 0.062 | 0.003 |
| LCM-31 |        | 61.08 | 23.17 | 0.32        | 4.53        | 0.18 | 8.70  | 1.06  | 99.05  | 0.731 | 0.210 | 0.059 | 0.003 |
| LCM-31 |        | 61.12 | 23.50 | 0.36        | 5.05        | 0.10 | 8.40  | 0.89  | 99.41  | 0.713 | 0.237 | 0.050 | 0.002 |



|        |     |       |       |      |      |      |      |       |        |       |       |       |       |
|--------|-----|-------|-------|------|------|------|------|-------|--------|-------|-------|-------|-------|
| LCM-32 | 1a  | 63.20 | 20.47 | 0.13 | 0.59 | 2.72 | 3.95 | 9.77  | 100.84 | 0.369 | 0.031 | 0.601 | 0.049 |
| LCM-32 | 1b  | 63.29 | 20.20 | 0.12 | 0.62 | 2.91 | 3.89 | 9.70  | 100.73 | 0.367 | 0.032 | 0.601 | 0.052 |
| LCM-32 | 4b  | 63.98 | 20.17 | 0.16 | 0.65 | 1.31 | 4.27 | 9.94  | 100.47 | 0.382 | 0.032 | 0.585 | 0.023 |
| LCM-32 | 5b  | 57.73 | 27.09 | 0.40 | 8.17 | 0.33 | 6.19 | 0.79  | 100.70 | 0.552 | 0.402 | 0.046 | 0.006 |
| LCM-32 | 5c  | 58.40 | 27.06 | 0.40 | 7.85 | 0.25 | 6.22 | 0.79  | 100.98 | 0.561 | 0.392 | 0.047 | 0.005 |
| LCM-32 | 10a | 64.46 | 20.14 | 0.15 | 0.54 | 1.34 | 4.20 | 9.89  | 100.71 | 0.382 | 0.027 | 0.591 | 0.024 |
| LCM-32 | 10b | 64.25 | 20.10 | 0.16 | 0.59 | 1.37 | 4.15 | 9.70  | 100.32 | 0.382 | 0.030 | 0.588 | 0.025 |
| LCM-32 | 10c | 64.26 | 19.77 | 0.13 | 0.58 | 1.33 | 4.05 | 9.83  | 99.95  | 0.374 | 0.030 | 0.597 | 0.024 |
| LCM-32 | 1c  | 62.66 | 20.17 | 0.18 | 0.60 | 2.71 | 4.03 | 9.50  | 99.86  | 0.380 | 0.031 | 0.589 | 0.049 |
| LCM-32 | 2a  | 59.90 | 25.31 | 0.37 | 6.37 | 0.10 | 7.41 | 0.58  | 100.04 | 0.655 | 0.311 | 0.034 | 0.002 |
| LCM-32 | 2b  | 60.69 | 25.42 | 0.33 | 6.28 | 0.08 | 7.28 | 0.59  | 100.66 | 0.654 | 0.312 | 0.035 | 0.001 |
| LCM-32 | 3a  | 58.36 | 25.93 | 0.32 | 7.14 | 0.05 | 6.96 | 0.59  | 99.34  | 0.616 | 0.349 | 0.034 | 0.001 |
| LCM-32 | 3b  | 59.45 | 26.20 | 0.31 | 7.00 | 0.13 | 6.97 | 0.60  | 100.66 | 0.620 | 0.345 | 0.035 | 0.002 |
| LCM-32 | 4a  | 64.04 | 20.21 | 0.09 | 0.67 | 1.49 | 4.23 | 9.68  | 100.41 | 0.386 | 0.034 | 0.580 | 0.027 |
| LCM-32 | 4c  | 63.86 | 20.26 | 0.11 | 0.72 | 1.40 | 4.24 | 9.55  | 100.15 | 0.388 | 0.037 | 0.575 | 0.025 |
| LCM-32 | 5a  | 58.02 | 26.78 | 0.37 | 7.72 | 0.33 | 6.24 | 0.83  | 100.29 | 0.565 | 0.386 | 0.049 | 0.006 |
| LCM-32 | 6a  | 66.41 | 19.35 | 0.09 | 0.24 | 0.13 | 4.12 | 10.51 | 100.84 | 0.369 | 0.012 | 0.619 | 0.002 |
| LCM-32 | 6b  | 65.06 | 19.04 | 0.12 | 0.21 | 0.08 | 4.04 | 10.72 | 99.28  | 0.361 | 0.010 | 0.629 | 0.001 |
| LCM-32 | 7a  | 62.45 | 23.86 | 0.26 | 4.78 | 0.09 | 7.43 | 1.75  | 100.60 | 0.662 | 0.235 | 0.103 | 0.002 |
| LCM-32 | 7b  | 61.02 | 23.92 | 0.24 | 4.94 | 0.11 | 7.41 | 1.74  | 99.39  | 0.657 | 0.242 | 0.101 | 0.002 |
| LCM-32 | 8a  | 63.89 | 19.93 | 0.12 | 0.64 | 1.08 | 4.21 | 9.64  | 99.52  | 0.386 | 0.033 | 0.581 | 0.020 |
| LCM-32 | 8b  | 63.41 | 19.71 | 0.15 | 0.68 | 1.07 | 4.46 | 9.83  | 99.31  | 0.394 | 0.033 | 0.572 | 0.019 |
| LCM-32 | 9a  | 64.11 | 20.27 | 0.11 | 0.67 | 2.04 | 4.12 | 9.52  | 100.84 | 0.383 | 0.034 | 0.582 | 0.037 |
| LCM-32 | 9b  | 63.80 | 20.24 | 0.12 | 0.68 | 2.10 | 4.11 | 9.33  | 100.39 | 0.387 | 0.035 | 0.578 | 0.038 |
| LCM-32 | 9c  | 64.18 | 20.49 | 0.14 | 0.74 | 2.00 | 4.15 | 9.71  | 101.41 | 0.379 | 0.037 | 0.584 | 0.036 |
| LCM-34 |     | 59.88 | 24.51 | 0.31 | 5.91 | 0.11 | 7.70 | 0.74  | 99.17  | 0.672 | 0.285 | 0.042 | 0.002 |
| LCM-34 |     | 60.47 | 24.67 | 0.29 | 5.93 | 0.13 | 7.57 | 0.72  | 99.77  | 0.669 | 0.289 | 0.042 | 0.002 |
| LCM-34 |     | 59.60 | 24.62 | 0.33 | 6.08 | 0.11 | 7.60 | 0.73  | 99.07  | 0.664 | 0.294 | 0.042 | 0.002 |
| LCM-34 |     | 61.02 | 23.83 | 0.46 | 5.14 | 0.20 | 7.89 | 0.83  | 99.38  | 0.699 | 0.252 | 0.049 | 0.004 |
| LCM-34 |     | 60.74 | 24.48 | 0.31 | 5.94 | 0.13 | 7.25 | 0.74  | 99.57  | 0.658 | 0.298 | 0.044 | 0.002 |
| LCM-34 |     | 60.95 | 25.32 | 0.39 | 5.97 | 0.10 | 7.35 | 0.74  | 100.82 | 0.660 | 0.296 | 0.044 | 0.002 |
| LCM-34 |     | 60.13 | 24.50 | 0.50 | 5.86 | 0.16 | 7.54 | 0.73  | 99.44  | 0.670 | 0.288 | 0.043 | 0.003 |
| LCM-34 |     | 59.98 | 24.62 | 0.39 | 6.08 | 0.14 | 7.75 | 0.70  | 99.66  | 0.670 | 0.290 | 0.040 | 0.002 |
| LCM-34 |     | 61.87 | 24.17 | 0.32 | 5.04 | 0.14 | 7.95 | 0.89  | 100.37 | 0.702 | 0.246 | 0.052 | 0.003 |
| LCM-34 |     | 61.63 | 24.65 | 0.48 | 5.65 | 0.17 | 7.65 | 0.76  | 100.98 | 0.679 | 0.277 | 0.044 | 0.003 |
| LCM-34 |     | 60.87 | 23.96 | 0.38 | 5.33 | 0.12 | 8.04 | 0.84  | 99.55  | 0.697 | 0.255 | 0.048 | 0.002 |
| LCM-34 |     | 59.31 | 24.67 | 0.37 | 6.12 | 0.12 | 7.82 | 0.72  | 99.13  | 0.670 | 0.290 | 0.041 | 0.002 |
| LCM-35 | 11a | 63.73 | 23.66 | 0.17 | 3.98 | 0.12 | 8.36 | 1.11  | 101.13 | 0.741 | 0.195 | 0.065 | 0.002 |
| LCM-35 | 1a  | 60.49 | 25.60 | 0.36 | 6.24 | 0.21 | 7.13 | 0.79  | 100.81 | 0.642 | 0.311 | 0.047 | 0.004 |
| LCM-35 | 2b  | 64.32 | 22.49 | 0.30 | 2.96 | 0.13 | 8.99 | 1.36  | 100.54 | 0.780 | 0.142 | 0.078 | 0.002 |
| LCM-35 | 5a  | 66.85 | 19.38 | 0.32 | 0.18 | 0.14 | 5.08 | 9.16  | 101.12 | 0.453 | 0.009 | 0.538 | 0.003 |
| LCM-35 | 5b  | 66.54 | 19.21 | 0.35 | 0.16 | 0.06 | 5.13 | 9.17  | 100.62 | 0.456 | 0.008 | 0.536 | 0.001 |
| LCM-35 | 6a  | 61.64 | 24.26 | 0.28 | 4.93 | 0.14 | 8.12 | 0.83  | 100.20 | 0.713 | 0.239 | 0.048 | 0.002 |
| LCM-35 | 8b  | 62.42 | 24.03 | 0.42 | 4.54 | 0.35 | 7.76 | 1.29  | 100.80 | 0.698 | 0.226 | 0.076 | 0.006 |
| LCM-35 | 9a  | 59.71 | 26.08 | 0.41 | 7.00 | 0.08 | 6.77 | 0.78  | 100.83 | 0.607 | 0.347 | 0.046 | 0.001 |
| LCM-35 | 9b  | 58.15 | 26.49 | 0.40 | 7.63 | 0.14 | 6.63 | 0.71  | 100.14 | 0.586 | 0.373 | 0.041 | 0.002 |
| LCM-35 | 10a | 64.06 | 22.40 | 0.34 | 2.60 | 0.70 | 8.21 | 2.29  | 100.59 | 0.736 | 0.129 | 0.135 | 0.012 |
| LCM-35 | 10b | 64.09 | 22.74 | 0.45 | 3.16 | 0.31 | 8.25 | 1.62  | 100.61 | 0.746 | 0.158 | 0.096 | 0.006 |
| LCM-35 | 10c | 64.63 | 21.78 | 0.33 | 2.15 | 0.53 | 7.79 | 3.24  | 100.43 | 0.701 | 0.107 | 0.192 | 0.009 |
| LCM-35 | 11b | 63.14 | 23.39 | 0.28 | 3.87 | 0.05 | 8.39 | 1.17  | 100.29 | 0.743 | 0.189 | 0.068 | 0.001 |
| LCM-35 | 1b  | 59.93 | 26.01 | 0.38 | 7.08 | 0.09 | 6.82 | 0.64  | 100.95 | 0.611 | 0.351 | 0.038 | 0.002 |
| LCM-35 | 1c  | 60.64 | 25.99 | 0.43 | 6.61 | 0.14 | 6.97 | 0.70  | 101.48 | 0.629 | 0.329 | 0.042 | 0.003 |
| LCM-35 | 2a  | 63.66 | 22.54 | 0.33 | 3.24 | 0.14 | 8.84 | 1.34  | 100.08 | 0.768 | 0.155 | 0.076 | 0.002 |
| LCM-35 | 2c  | 64.22 | 22.21 | 0.35 | 2.82 | 0.17 | 9.05 | 1.46  | 100.28 | 0.782 | 0.135 | 0.083 | 0.003 |
| LCM-35 | 3a  | 65.66 | 21.55 | 0.28 | 1.82 | 0.38 | 7.27 | 4.23  | 101.19 | 0.657 | 0.091 | 0.252 | 0.007 |
| LCM-35 | 3c  | 64.59 | 21.33 | 0.27 | 1.78 | 0.38 | 7.46 | 4.02  | 99.82  | 0.673 | 0.089 | 0.239 | 0.007 |
| LCM-35 | 6b  | 61.76 | 24.02 | 0.33 | 4.79 | 0.11 | 8.19 | 0.87  | 100.07 | 0.718 | 0.232 | 0.050 | 0.002 |
| LCM-35 | 7a  | 64.48 | 23.10 | 0.26 | 3.55 | 0.15 | 8.22 | 1.55  | 101.31 | 0.734 | 0.175 | 0.091 | 0.003 |
| LCM-35 | 8a  | 62.46 | 24.09 | 0.35 | 4.57 | 0.43 | 7.72 | 1.26  | 100.88 | 0.697 | 0.228 | 0.075 | 0.008 |
| LCM-35 |     | 63.38 | 22.20 | 0.17 | 3.30 | 0.01 | 9.16 | 1.53  | 99.76  | 0.764 | 0.152 | 0.084 | 0.000 |
| LCM-35 |     | 60.99 | 23.94 | 0.28 | 4.95 | 0.13 | 7.73 | 1.61  | 99.62  | 0.671 | 0.237 | 0.092 | 0.002 |
| LCM-35 |     | 60.85 | 24.05 | 0.23 | 5.18 | 0.20 | 7.71 | 1.70  | 99.92  | 0.659 | 0.245 | 0.096 | 0.003 |
| LCM-35 |     | 65.91 | 18.70 | 0.44 | 0.18 | 0.00 | 6.96 | 7.16  | 99.34  | 0.592 | 0.008 | 0.400 | 0.000 |
| LCM-35 |     | 65.38 | 18.48 | 0.51 | 0.15 | 0.05 | 7.04 | 7.06  | 98.69  | 0.598 | 0.007 | 0.395 | 0.001 |
| LCM-35 |     | 66.53 | 19.27 | 0.32 | 0.24 | 0.04 | 7.10 | 7.00  | 100.49 | 0.600 | 0.011 | 0.389 | 0.001 |
| LCM-35 |     | 65.80 | 19.12 | 0.31 | 0.21 | 0.02 | 6.93 | 6.93  | 99.33  | 0.597 | 0.010 | 0.393 | 0.000 |
| LCM-35 |     | 63.84 | 19.89 | 0.13 | 0.73 | 1.12 | 4.56 | 9.67  | 99.95  | 0.403 | 0.036 | 0.562 | 0.020 |
| LCM-35 |     | 63.35 | 19.86 | 0.18 | 0.62 | 1.74 | 4.24 | 9.64  | 99.64  | 0.388 | 0.031 | 0.580 | 0.031 |
| LCM-35 |     | 64.52 | 19.71 | 0.09 | 0.62 | 0.60 | 4.54 | 9.75  | 99.83  | 0.402 | 0.030 | 0.568 | 0.011 |
| LCM-35 |     | 64.00 | 19.50 | 0.14 | 0.62 | 0.61 | 4.57 | 9.82  | 99.26  | 0.402 | 0.030 | 0.568 | 0.011 |
| LCM-35 |     | 64.74 | 19.86 | 0.15 | 0.64 | 0.57 | 4.58 | 9.71  | 100.25 | 0.405 | 0.031 | 0.564 | 0.010 |
| LCM-35 |     | 63.99 | 20.09 | 0.20 | 0.67 | 1.14 | 4.49 | 9.83  | 100.41 | 0.397 | 0.032 | 0.571 | 0.020 |
| LCM-35 |     | 62.98 | 19.50 | 0.14 | 0.61 | 1.63 | 4.24 | 9.87  | 98.96  | 0.383 | 0.030 | 0.587 | 0.029 |
| LCM-35 |     | 65.73 | 18.86 | 0.36 | 0.24 | 0.03 | 6.88 | 7.00  | 99.10  | 0.592 | 0.011 | 0.396 | 0.000 |
| LCM-35 |     | 65.99 | 19.04 | 0.44 | 0.21 | 0.02 | 6.92 | 7.04  | 99.67  | 0.593 | 0.010 | 0.397 | 0.000 |
| LCM-36 | 1   | 61.99 | 22.90 | 0.35 | 4.16 | 0.86 | 7.89 | 1.09  | 99.24  | 0.723 | 0.211 | 0.066 | 0.016 |

|        |    |       |       |      |      |      |       |       |        |       |       |       |       |
|--------|----|-------|-------|------|------|------|-------|-------|--------|-------|-------|-------|-------|
| LCM-36 | 1  | 61.61 | 23.48 | 0.46 | 4.82 | 0.28 | 7.92  | 1.00  | 99.58  | 0.705 | 0.237 | 0.058 | 0.005 |
| LCM-36 | 1  | 60.59 | 25.02 | 0.32 | 6.16 | 0.10 | 7.34  | 0.55  | 100.08 | 0.661 | 0.307 | 0.032 | 0.002 |
| LCM-36 | 1  | 60.37 | 25.75 | 0.49 | 6.56 | 0.07 | 7.29  | 0.53  | 101.07 | 0.647 | 0.322 | 0.031 | 0.001 |
| LCM-36 | 1  | 61.02 | 25.58 | 0.44 | 6.57 | 0.05 | 7.00  | 0.54  | 101.20 | 0.637 | 0.331 | 0.032 | 0.001 |
| LCM-36 | 2  | 60.39 | 25.87 | 0.52 | 6.98 | 0.07 | 6.98  | 0.49  | 101.31 | 0.625 | 0.346 | 0.029 | 0.001 |
| LCM-36 | 2  | 59.73 | 26.14 | 0.58 | 7.26 | 0.07 | 6.81  | 0.46  | 101.05 | 0.612 | 0.361 | 0.027 | 0.001 |
| LCM-36 | 2  | 58.80 | 25.84 | 0.53 | 7.48 | 0.15 | 6.21  | 1.03  | 100.03 | 0.564 | 0.375 | 0.061 | 0.003 |
| LCM-36 | 3  | 63.01 | 21.00 | 0.21 | 2.73 | 2.81 | 9.05  | 0.44  | 99.25  | 0.834 | 0.139 | 0.027 | 0.050 |
| LCM-36 | 3  | 65.05 | 22.52 | 0.36 | 3.03 | 0.40 | 8.28  | 1.50  | 101.15 | 0.757 | 0.153 | 0.090 | 0.007 |
| LCM-36 | 3  | 63.90 | 22.74 | 0.34 | 3.38 | 0.30 | 8.70  | 1.41  | 100.75 | 0.757 | 0.162 | 0.081 | 0.005 |
| LCM-36 | 3  | 64.01 | 22.73 | 0.30 | 3.49 | 0.36 | 8.47  | 1.36  | 100.71 | 0.750 | 0.171 | 0.079 | 0.006 |
| LCM-36 | 3  | 61.48 | 24.66 | 0.29 | 5.75 | 0.11 | 7.62  | 0.67  | 100.58 | 0.678 | 0.283 | 0.039 | 0.002 |
| LCM-36 | 3  | 61.15 | 24.26 | 0.39 | 5.87 | 0.11 | 7.51  | 0.66  | 99.95  | 0.671 | 0.290 | 0.039 | 0.002 |
| LCM-36 | 4  | 64.48 | 22.52 | 0.42 | 2.78 | 0.58 | 8.45  | 1.77  | 101.01 | 0.758 | 0.138 | 0.105 | 0.010 |
| LCM-36 | 4  | 61.26 | 23.76 | 0.44 | 5.27 | 0.18 | 7.59  | 0.75  | 99.25  | 0.690 | 0.265 | 0.045 | 0.003 |
| LCM-36 | 4  | 61.22 | 25.04 | 0.41 | 5.60 | 0.36 | 7.69  | 0.64  | 100.98 | 0.686 | 0.276 | 0.038 | 0.007 |
| LCM-36 | 4  | 60.58 | 24.87 | 0.28 | 5.73 | 0.40 | 7.62  | 0.67  | 100.14 | 0.679 | 0.282 | 0.039 | 0.007 |
| LCM-36 | 5  | 61.80 | 25.17 | 0.39 | 5.74 | 0.19 | 7.36  | 0.85  | 101.50 | 0.664 | 0.286 | 0.050 | 0.003 |
| LCM-36 | 5  | 60.54 | 25.05 | 0.39 | 5.90 | 0.20 | 7.39  | 0.85  | 100.33 | 0.659 | 0.291 | 0.050 | 0.004 |
| LCM-36 | 5  | 61.17 | 24.88 | 0.43 | 5.97 | 0.17 | 7.33  | 0.82  | 100.76 | 0.656 | 0.296 | 0.048 | 0.003 |
| LCM-36 | 5  | 60.52 | 24.37 | 0.48 | 6.03 | 0.14 | 7.33  | 0.64  | 99.50  | 0.662 | 0.301 | 0.038 | 0.003 |
| LCM-36 | 5  | 60.65 | 24.94 | 0.41 | 6.34 | 0.10 | 7.15  | 0.66  | 100.25 | 0.645 | 0.316 | 0.039 | 0.002 |
| LCM-36 | 6  | 62.28 | 24.11 | 0.35 | 5.06 | 0.15 | 7.83  | 0.78  | 100.56 | 0.703 | 0.251 | 0.046 | 0.003 |
| LCM-36 | 6  | 61.77 | 24.44 | 0.41 | 5.27 | 0.17 | 8.00  | 0.76  | 100.83 | 0.701 | 0.255 | 0.044 | 0.003 |
| LCM-36 | 6  | 62.95 | 24.38 | 0.31 | 5.03 | 0.21 | 7.59  | 0.78  | 101.24 | 0.698 | 0.255 | 0.047 | 0.004 |
| LCM-36 | 6  | 61.30 | 23.94 | 0.38 | 5.56 | 0.14 | 7.42  | 0.75  | 99.49  | 0.675 | 0.280 | 0.045 | 0.003 |
| LCM-36 | 6  | 60.22 | 24.06 | 0.46 | 6.07 | 0.17 | 7.44  | 0.65  | 99.07  | 0.663 | 0.299 | 0.038 | 0.003 |
| LCM-36 | 6  | 60.94 | 24.62 | 0.46 | 6.16 | 0.16 | 7.28  | 0.65  | 100.27 | 0.655 | 0.306 | 0.038 | 0.003 |
| LCM-36 | 7  | 62.62 | 24.07 | 0.42 | 4.82 | 0.17 | 8.13  | 0.83  | 101.06 | 0.717 | 0.235 | 0.048 | 0.003 |
| LCM-36 | 7  | 62.52 | 24.32 | 0.31 | 5.08 | 0.13 | 7.91  | 0.80  | 101.08 | 0.703 | 0.250 | 0.047 | 0.002 |
| LCM-36 | 7  | 62.21 | 24.13 | 0.47 | 5.29 | 0.16 | 7.91  | 0.74  | 100.91 | 0.699 | 0.258 | 0.043 | 0.003 |
| LCM-36 | 8  | 63.25 | 23.29 | 0.42 | 4.37 | 0.17 | 8.26  | 0.98  | 100.73 | 0.730 | 0.213 | 0.057 | 0.003 |
| LCM-36 | 8  | 63.03 | 23.54 | 0.36 | 4.56 | 0.23 | 8.20  | 0.95  | 100.87 | 0.723 | 0.222 | 0.055 | 0.004 |
| LCM-36 | 8  | 62.74 | 23.89 | 0.45 | 4.64 | 0.20 | 7.99  | 0.96  | 100.87 | 0.714 | 0.229 | 0.057 | 0.004 |
| LCM-36 | 8  | 60.22 | 25.03 | 0.38 | 6.71 | 0.08 | 6.92  | 0.54  | 99.88  | 0.630 | 0.338 | 0.032 | 0.001 |
| LCM-36 | 8  | 59.43 | 25.35 | 0.41 | 7.01 | 0.08 | 6.89  | 0.52  | 99.68  | 0.620 | 0.349 | 0.031 | 0.001 |
| LCM-36 | 8  | 59.84 | 25.33 | 0.54 | 7.14 | 0.08 | 6.70  | 0.50  | 100.13 | 0.611 | 0.360 | 0.030 | 0.001 |
| LCM-36 | 9  | 59.36 | 26.50 | 0.42 | 7.37 | 0.09 | 6.94  | 0.43  | 101.10 | 0.614 | 0.361 | 0.025 | 0.002 |
| LCM-36 | 9  | 58.97 | 26.63 | 0.38 | 7.60 | 0.07 | 6.64  | 0.44  | 100.72 | 0.597 | 0.377 | 0.026 | 0.001 |
| LCM-36 | 9  | 59.25 | 26.59 | 0.38 | 7.68 | 0.04 | 6.70  | 0.41  | 101.05 | 0.598 | 0.378 | 0.024 | 0.001 |
| LCM-36 | 9  | 58.34 | 25.55 | 0.46 | 7.99 | 0.08 | 6.48  | 0.42  | 99.32  | 0.580 | 0.395 | 0.025 | 0.001 |
| LCM-36 | 10 | 63.76 | 23.08 | 0.27 | 3.79 | 0.00 | 8.44  | 1.25  | 100.59 | 0.743 | 0.185 | 0.073 | 0.000 |
| LCM-36 | 10 | 64.17 | 23.25 | 0.17 | 3.79 | 0.03 | 8.27  | 1.25  | 100.95 | 0.739 | 0.187 | 0.074 | 0.001 |
| LCM-36 | 10 | 62.93 | 22.74 | 0.40 | 4.28 | 0.24 | 8.07  | 1.16  | 99.81  | 0.721 | 0.211 | 0.068 | 0.004 |
| LCM-36 | 10 | 63.20 | 23.77 | 0.19 | 4.66 | 0.05 | 8.18  | 0.98  | 101.03 | 0.718 | 0.226 | 0.056 | 0.001 |
| LCM-36 | 11 | 69.24 | 20.17 | 0.24 | 0.01 | 0.00 | 11.47 | 0.15  | 101.29 | 0.991 | 0.001 | 0.008 | 0.000 |
| LCM-36 | 11 | 67.80 | 19.87 | 0.51 | 0.03 | 0.01 | 11.47 | 0.08  | 99.76  | 0.994 | 0.001 | 0.004 | 0.000 |
| LCM-36 | 11 | 68.83 | 19.85 | 0.69 | 0.03 | 0.00 | 11.32 | 0.15  | 100.86 | 0.990 | 0.001 | 0.008 | 0.000 |
| LCM-36 | 12 | 60.54 | 25.45 | 0.57 | 6.19 | 0.12 | 7.39  | 0.57  | 100.82 | 0.661 | 0.306 | 0.034 | 0.002 |
| LCM-36 | 12 | 60.46 | 25.78 | 0.49 | 6.78 | 0.08 | 7.14  | 0.55  | 101.27 | 0.635 | 0.333 | 0.032 | 0.001 |
| LCM-36 | 12 | 59.49 | 26.16 | 0.51 | 7.41 | 0.10 | 6.96  | 0.43  | 101.05 | 0.614 | 0.361 | 0.025 | 0.002 |
| LCM-36 |    | 66.49 | 19.08 | 0.42 | 0.22 | 0.00 | 6.95  | 7.01  | 100.16 | 0.595 | 0.011 | 0.395 | 0.000 |
| LCM-36 |    | 66.57 | 19.24 | 0.41 | 0.17 | 0.05 | 6.94  | 7.32  | 100.70 | 0.586 | 0.008 | 0.406 | 0.001 |
| LCM-36 |    | 67.11 | 19.30 | 0.41 | 0.17 | 0.00 | 6.75  | 7.12  | 100.86 | 0.586 | 0.008 | 0.406 | 0.000 |
| LCM-36 |    | 63.47 | 19.91 | 0.18 | 0.64 | 1.79 | 4.34  | 9.60  | 99.93  | 0.395 | 0.032 | 0.574 | 0.032 |
| LCM-36 |    | 63.53 | 19.59 | 0.24 | 0.64 | 1.44 | 4.34  | 9.81  | 99.58  | 0.389 | 0.032 | 0.579 | 0.025 |
| LCM-36 |    | 66.15 | 19.25 | 0.33 | 0.31 | 0.05 | 6.94  | 6.93  | 99.97  | 0.595 | 0.015 | 0.391 | 0.001 |
| LCM-36 |    | 67.32 | 19.31 | 0.40 | 0.22 | 0.00 | 7.00  | 6.60  | 100.86 | 0.611 | 0.011 | 0.379 | 0.000 |
| LCM-36 |    | 66.81 | 19.40 | 0.39 | 0.22 | 0.03 | 7.24  | 6.92  | 101.01 | 0.608 | 0.010 | 0.382 | 0.001 |
| LCM-36 |    | 67.04 | 19.49 | 0.37 | 0.24 | 0.00 | 7.13  | 6.76  | 101.03 | 0.609 | 0.011 | 0.380 | 0.000 |
| LCM-36 |    | 66.95 | 19.49 | 0.44 | 0.21 | 0.04 | 7.05  | 7.12  | 101.29 | 0.595 | 0.010 | 0.395 | 0.001 |
| LCM-36 |    | 67.35 | 19.68 | 0.42 | 0.22 | 0.07 | 6.86  | 6.91  | 101.49 | 0.595 | 0.011 | 0.395 | 0.001 |
| LCM-36 |    | 63.44 | 20.18 | 0.20 | 0.67 | 1.83 | 4.29  | 9.58  | 100.17 | 0.391 | 0.034 | 0.575 | 0.033 |
| LCM-36 |    | 63.62 | 19.82 | 0.23 | 0.62 | 1.31 | 4.33  | 9.72  | 99.65  | 0.391 | 0.031 | 0.578 | 0.023 |
| LCM-37 | 1  | 57.55 | 26.04 | 0.39 | 7.63 | 0.04 | 6.93  | 0.47  | 99.05  | 0.605 | 0.368 | 0.027 | 0.001 |
| LCM-37 | 2  | 64.92 | 19.16 | 0.05 | 0.24 | 0.07 | 4.17  | 10.68 | 99.29  | 0.368 | 0.012 | 0.620 | 0.001 |
| LCM-37 | 2  | 64.98 | 19.23 | 0.06 | 0.24 | 0.08 | 4.08  | 10.69 | 99.35  | 0.363 | 0.012 | 0.626 | 0.001 |
| LCM-37 | 2  | 65.42 | 19.07 | 0.04 | 0.25 | 0.06 | 4.10  | 10.75 | 99.69  | 0.363 | 0.012 | 0.625 | 0.001 |
| LCM-37 | 3  | 61.81 | 23.69 | 0.24 | 4.45 | 0.09 | 7.63  | 2.10  | 100.01 | 0.665 | 0.214 | 0.120 | 0.002 |
| LCM-37 | 3  | 61.76 | 23.46 | 0.14 | 4.54 | 0.12 | 7.42  | 2.01  | 99.44  | 0.660 | 0.223 | 0.117 | 0.002 |
| LCM-37 | 3  | 61.64 | 24.27 | 0.44 | 5.11 | 0.23 | 7.58  | 0.89  | 100.17 | 0.690 | 0.257 | 0.053 | 0.004 |
| LCM-37 | 4  | 62.96 | 23.12 | 0.19 | 3.78 | 0.01 | 8.69  | 1.18  | 99.92  | 0.752 | 0.181 | 0.067 | 0.000 |
| LCM-37 | 4  | 63.09 | 23.53 | 0.29 | 3.86 | 0.00 | 8.65  | 1.15  | 100.56 | 0.750 | 0.185 | 0.066 | 0.000 |
| LCM-37 | 4  | 62.31 | 24.14 | 0.22 | 3.88 | 0.00 | 8.55  | 1.04  | 100.13 | 0.752 | 0.188 | 0.060 | 0.000 |
| LCM-37 | 5  | 60.85 | 23.98 | 0.47 | 5.58 | 0.16 | 7.29  | 0.80  | 99.12  | 0.669 | 0.283 | 0.048 | 0.003 |

|        |       |       |       |      |      |      |       |       |        |  |       |       |       |       |
|--------|-------|-------|-------|------|------|------|-------|-------|--------|--|-------|-------|-------|-------|
| LCM-37 | 5     | 59.53 | 25.33 | 0.33 | 6.36 | 0.24 | 6.92  | 1.22  | 99.92  |  | 0.616 | 0.313 | 0.071 | 0.004 |
| LCM-37 | 5     | 59.30 | 25.12 | 0.30 | 6.45 | 0.25 | 7.01  | 1.23  | 99.65  |  | 0.616 | 0.313 | 0.071 | 0.004 |
| LCM-37 | 5     | 59.05 | 25.20 | 0.30 | 6.49 | 0.22 | 6.88  | 1.24  | 99.39  |  | 0.610 | 0.318 | 0.072 | 0.004 |
| LCM-37 | 6     | 59.10 | 26.01 | 0.40 | 7.12 | 0.05 | 7.12  | 0.49  | 100.30 |  | 0.625 | 0.346 | 0.029 | 0.001 |
| LCM-37 | 6     | 59.20 | 26.14 | 0.36 | 7.25 | 0.07 | 7.09  | 0.49  | 100.59 |  | 0.621 | 0.351 | 0.028 | 0.001 |
| LCM-37 | 6     | 58.95 | 26.18 | 0.31 | 7.37 | 0.07 | 6.92  | 0.48  | 100.27 |  | 0.612 | 0.360 | 0.028 | 0.001 |
| LCM-37 | 7     | 68.03 | 19.81 | 0.34 | 0.06 | 0.03 | 11.44 | 0.23  | 99.95  |  | 0.984 | 0.003 | 0.013 | 0.001 |
| LCM-37 | 7     | 67.94 | 19.66 | 0.31 | 0.56 | 0.05 | 10.32 | 1.75  | 100.60 |  | 0.876 | 0.026 | 0.098 | 0.001 |
| LCM-37 | 7     | 67.14 | 19.46 | 0.30 | 1.38 | 0.05 | 10.79 | 0.49  | 99.60  |  | 0.908 | 0.064 | 0.027 | 0.001 |
| LCM-37 | 7     | 61.08 | 23.63 | 0.38 | 4.96 | 0.25 | 7.97  | 0.93  | 99.19  |  | 0.704 | 0.242 | 0.054 | 0.004 |
| LCM-37 | 8     | 60.55 | 24.08 | 0.37 | 5.84 | 0.21 | 7.36  | 0.78  | 99.18  |  | 0.663 | 0.291 | 0.046 | 0.004 |
| LCM-37 | 8     | 60.37 | 24.74 | 0.38 | 6.10 | 0.13 | 7.37  | 0.67  | 99.76  |  | 0.659 | 0.302 | 0.040 | 0.002 |
| LCM-37 | 8     | 57.38 | 27.19 | 0.32 | 8.47 | 0.02 | 6.18  | 0.51  | 100.08 |  | 0.552 | 0.418 | 0.030 | 0.000 |
| LCM-37 | 8     | 56.86 | 27.05 | 0.22 | 8.56 | 0.01 | 6.22  | 0.53  | 99.44  |  | 0.551 | 0.419 | 0.031 | 0.000 |
| LCM-37 | 8     | 57.47 | 27.35 | 0.27 | 8.55 | 0.02 | 6.15  | 0.50  | 100.30 |  | 0.549 | 0.422 | 0.029 | 0.000 |
| LCM-37 | 9     | 64.37 | 22.45 | 0.19 | 3.30 | 0.00 | 8.49  | 1.55  | 100.37 |  | 0.749 | 0.161 | 0.090 | 0.000 |
| LCM-37 | 9     | 64.17 | 22.61 | 0.25 | 3.38 | 0.02 | 8.59  | 1.61  | 100.62 |  | 0.746 | 0.162 | 0.092 | 0.000 |
| LCM-37 | 9     | 63.77 | 22.47 | 0.28 | 3.31 | 0.00 | 8.36  | 1.63  | 99.82  |  | 0.742 | 0.162 | 0.095 | 0.000 |
| LCM-37 | 10    | 60.87 | 24.10 | 0.45 | 5.46 | 0.14 | 7.65  | 0.85  | 99.51  |  | 0.681 | 0.269 | 0.050 | 0.002 |
| LCM-37 | 10    | 60.42 | 25.35 | 0.28 | 6.54 | 0.08 | 7.02  | 0.87  | 100.56 |  | 0.627 | 0.322 | 0.051 | 0.002 |
| LCM-37 | 10    | 59.73 | 25.62 | 0.38 | 6.74 | 0.09 | 6.97  | 0.81  | 100.33 |  | 0.621 | 0.332 | 0.047 | 0.002 |
| LCM-37 | 10    | 59.13 | 26.11 | 0.36 | 7.35 | 0.07 | 6.71  | 0.70  | 100.41 |  | 0.597 | 0.362 | 0.041 | 0.001 |
| LCM-37 | 11    | 67.44 | 20.19 | 0.09 | 0.21 | 0.00 | 11.23 | 0.22  | 99.38  |  | 0.978 | 0.010 | 0.022 | 0.000 |
| LCM-37 | 11    | 67.90 | 20.40 | 0.14 | 0.21 | 0.00 | 11.21 | 0.28  | 100.13 |  | 0.974 | 0.010 | 0.016 | 0.000 |
| LCM-37 | 11    | 67.88 | 20.24 | 0.09 | 0.24 | 0.05 | 11.35 | 0.20  | 100.03 |  | 0.977 | 0.011 | 0.011 | 0.001 |
| LCM-37 | 12    | 60.03 | 25.68 | 0.21 | 6.62 | 0.04 | 7.07  | 0.66  | 100.29 |  | 0.634 | 0.328 | 0.039 | 0.001 |
| LCM-37 | 12    | 59.22 | 26.21 | 0.13 | 7.12 | 0.03 | 7.09  | 0.58  | 100.38 |  | 0.621 | 0.345 | 0.034 | 0.001 |
| LCM-37 | 12    | 59.24 | 26.14 | 0.19 | 7.09 | 0.02 | 6.99  | 0.63  | 100.31 |  | 0.617 | 0.346 | 0.037 | 0.000 |
| LCM-37 | 13    | 61.64 | 23.82 | 0.49 | 4.89 | 0.11 | 8.13  | 0.88  | 99.95  |  | 0.713 | 0.237 | 0.051 | 0.002 |
| LCM-37 | 13    | 61.23 | 23.99 | 0.40 | 5.07 | 0.19 | 8.07  | 0.84  | 99.81  |  | 0.706 | 0.245 | 0.048 | 0.003 |
| LCM-37 | 13    | 61.15 | 23.98 | 0.37 | 5.20 | 0.17 | 7.92  | 0.83  | 99.61  |  | 0.698 | 0.253 | 0.048 | 0.003 |
| LCM-37 | 14    | 58.60 | 25.84 | 0.31 | 7.23 | 0.09 | 6.88  | 0.51  | 99.46  |  | 0.614 | 0.356 | 0.030 | 0.002 |
| LCM-37 | 14    | 58.39 | 26.15 | 0.48 | 7.47 | 0.08 | 6.81  | 0.47  | 99.83  |  | 0.605 | 0.367 | 0.028 | 0.001 |
| LCM-37 | 14    | 58.60 | 25.91 | 0.45 | 7.44 | 0.06 | 6.78  | 0.47  | 99.71  |  | 0.605 | 0.367 | 0.028 | 0.001 |
| LCM-37 | 15    | 63.63 | 22.54 | 0.01 | 3.46 | 0.01 | 8.50  | 1.49  | 99.65  |  | 0.746 | 0.168 | 0.086 | 0.000 |
| LCM-37 | 15    | 63.68 | 22.84 | 0.23 | 3.88 | 0.03 | 8.48  | 1.38  | 100.51 |  | 0.736 | 0.186 | 0.079 | 0.000 |
| LCM-37 | 15    | 63.39 | 23.10 | 0.13 | 3.91 | 0.01 | 8.36  | 1.28  | 100.17 |  | 0.736 | 0.190 | 0.074 | 0.000 |
| LCM-37 | fel10 | 60.30 | 24.15 | 0.33 | 5.60 | 0.20 | 7.74  | 0.81  | 99.14  |  | 0.681 | 0.272 | 0.047 | 0.003 |
| LCM-38 | 1     | 62.55 | 23.25 | 0.37 | 4.17 | 0.26 | 8.42  | 1.07  | 100.07 |  | 0.737 | 0.202 | 0.062 | 0.005 |
| LCM-38 | 1     | 62.85 | 23.40 | 0.40 | 4.32 | 0.25 | 8.25  | 1.07  | 100.54 |  | 0.728 | 0.210 | 0.062 | 0.004 |
| LCM-38 | 1     | 62.57 | 23.68 | 0.40 | 4.48 | 0.25 | 8.28  | 0.93  | 100.58 |  | 0.728 | 0.218 | 0.054 | 0.004 |
| LCM-38 | 2     | 64.52 | 18.94 | 0.01 | 0.00 | 0.10 | 0.79  | 15.99 | 100.36 |  | 0.070 | 0.000 | 0.930 | 0.002 |
| LCM-38 | 2     | 65.14 | 19.00 | 0.17 | 0.00 | 0.11 | 2.04  | 14.36 | 100.81 |  | 0.177 | 0.000 | 0.823 | 0.002 |
| LCM-38 | 2     | 64.50 | 19.02 | 0.06 | 0.00 | 0.08 | 1.52  | 14.91 | 100.09 |  | 0.134 | 0.000 | 0.866 | 0.001 |
| LCM-38 | 3     | 59.73 | 24.58 | 0.44 | 5.83 | 0.15 | 7.54  | 0.81  | 99.07  |  | 0.668 | 0.285 | 0.047 | 0.003 |
| LCM-38 | 3     | 60.16 | 25.15 | 0.42 | 6.28 | 0.14 | 7.48  | 0.57  | 100.20 |  | 0.660 | 0.306 | 0.033 | 0.003 |
| LCM-38 | 3     | 60.39 | 25.03 | 0.44 | 6.28 | 0.13 | 7.48  | 0.56  | 100.31 |  | 0.661 | 0.307 | 0.033 | 0.002 |
| LCM-38 | 4     | 69.00 | 19.86 | 0.04 | 0.05 | 0.02 | 11.57 | 0.06  | 100.59 |  | 0.994 | 0.003 | 0.003 | 0.000 |
| LCM-38 | 4     | 68.62 | 20.11 | 0.05 | 0.09 | 0.03 | 11.53 | 0.10  | 100.52 |  | 0.990 | 0.004 | 0.006 | 0.000 |
| LCM-38 | 4     | 68.64 | 19.92 | 0.00 | 0.14 | 0.02 | 11.46 | 0.10  | 100.29 |  | 0.988 | 0.007 | 0.005 | 0.000 |
| LCM-38 | 4     | 68.24 | 20.05 | 0.05 | 0.23 | 0.02 | 11.65 | 0.18  | 100.41 |  | 0.979 | 0.011 | 0.010 | 0.000 |
| LCM-38 | 5     | 68.05 | 19.92 | 0.01 | 0.07 | 0.00 | 11.60 | 0.06  | 99.71  |  | 0.993 | 0.003 | 0.003 | 0.000 |
| LCM-38 | 6     | 62.96 | 18.80 | 0.00 | 0.00 | 1.08 | 0.65  | 15.81 | 99.31  |  | 0.058 | 0.000 | 0.941 | 0.019 |
| LCM-38 | 6     | 63.82 | 19.10 | 0.01 | 0.04 | 0.87 | 2.04  | 13.58 | 99.47  |  | 0.186 | 0.002 | 0.812 | 0.016 |
| LCM-38 | 7     | 63.72 | 19.23 | 0.00 | 0.00 | 1.04 | 1.06  | 15.02 | 100.08 |  | 0.097 | 0.000 | 0.903 | 0.019 |
| LCM-38 | 7     | 66.49 | 19.42 | 0.58 | 0.43 | 0.10 | 8.82  | 3.42  | 99.26  |  | 0.780 | 0.021 | 0.199 | 0.002 |
| LCM-38 | 7     | 66.43 | 19.95 | 0.95 | 0.64 | 0.11 | 8.43  | 3.14  | 99.65  |  | 0.777 | 0.032 | 0.190 | 0.002 |
| LCM-38 | 7     | 65.59 | 20.99 | 0.51 | 1.70 | 0.32 | 8.91  | 2.35  | 100.37 |  | 0.782 | 0.082 | 0.136 | 0.006 |
| LCM-38 | 8     | 65.86 | 19.61 | 0.46 | 0.77 | 0.18 | 7.47  | 5.00  | 99.34  |  | 0.668 | 0.038 | 0.294 | 0.003 |
| LCM-38 | 8     | 65.96 | 19.61 | 0.37 | 0.79 | 0.19 | 7.30  | 5.14  | 99.36  |  | 0.656 | 0.039 | 0.304 | 0.003 |
| LCM-38 | 8     | 66.37 | 19.89 | 0.56 | 0.84 | 0.15 | 8.54  | 3.53  | 99.88  |  | 0.754 | 0.041 | 0.205 | 0.003 |
| LCM-38 | 9     | 68.55 | 20.02 | 0.00 | 0.09 | 0.05 | 11.62 | 0.15  | 100.47 |  | 0.987 | 0.004 | 0.008 | 0.001 |
| LCM-38 | 9     | 68.40 | 19.87 | 0.05 | 0.10 | 0.04 | 11.69 | 0.08  | 100.23 |  | 0.991 | 0.005 | 0.004 | 0.001 |
| LCM-38 | 9     | 68.01 | 19.87 | 0.01 | 0.33 | 0.06 | 11.47 | 0.14  | 99.89  |  | 0.977 | 0.016 | 0.008 | 0.001 |
| LCM-38 | 10    | 68.66 | 20.08 | 0.05 | 0.06 | 0.00 | 11.68 | 0.08  | 100.61 |  | 0.993 | 0.003 | 0.005 | 0.000 |
| LCM-38 | 10    | 67.56 | 19.86 | 0.00 | 0.08 | 0.05 | 9.01  | 4.07  | 100.62 |  | 0.768 | 0.004 | 0.228 | 0.001 |
| LCM-39 | 9     | 69.10 | 19.27 | 0.27 | 0.13 | 0.02 | 10.99 | 0.67  | 100.46 |  | 0.956 | 0.006 | 0.038 | 0.000 |
| LCM-39 | 9     | 65.57 | 21.37 | 0.39 | 2.84 | 0.13 | 9.06  | 1.59  | 100.95 |  | 0.776 | 0.134 | 0.089 | 0.002 |
| LCM-39 | 10    | 65.70 | 20.25 | 0.28 | 1.78 | 0.62 | 8.27  | 3.47  | 100.38 |  | 0.717 | 0.085 | 0.198 | 0.011 |
| LCM-39 | 10    | 65.65 | 20.45 | 0.21 | 2.03 | 0.83 | 8.16  | 3.36  | 100.69 |  | 0.710 | 0.098 | 0.192 | 0.014 |
| LCM-39 | 11    | 62.09 | 23.28 | 0.37 | 5.23 | 0.12 | 7.79  | 1.00  | 99.89  |  | 0.687 | 0.255 | 0.058 | 0.002 |
| LCM-39 | 11    | 61.65 | 23.98 | 0.41 | 5.87 | 0.16 | 7.80  | 0.87  | 100.73 |  | 0.671 | 0.279 | 0.049 | 0.003 |
| LCM-39 | 11    | 61.18 | 23.79 | 0.44 | 5.82 | 0.07 | 7.55  | 0.87  | 99.73  |  | 0.666 | 0.283 | 0.051 | 0.001 |
| LCM-39 |       | 63.54 | 19.24 | 0.03 | 0.11 | 2.19 | 2.36  | 12.40 | 99.87  |  | 0.223 | 0.006 | 0.771 | 0.040 |

|        |    |       |       |      |       |      |       |       |        |       |       |       |       |
|--------|----|-------|-------|------|-------|------|-------|-------|--------|-------|-------|-------|-------|
| LCM-39 |    | 64.58 | 19.37 | 0.00 | 0.12  | 2.36 | 2.32  | 12.40 | 101.15 | 0.220 | 0.006 | 0.773 | 0.043 |
| LCM-39 |    | 67.63 | 19.15 | 0.34 | 0.24  | 0.08 | 6.92  | 6.59  | 100.94 | 0.608 | 0.012 | 0.381 | 0.001 |
| LCM-39 |    | 64.72 | 19.36 | 0.18 | 0.52  | 0.55 | 4.27  | 10.22 | 99.81  | 0.378 | 0.025 | 0.596 | 0.010 |
| LCM-39 |    | 65.56 | 19.50 | 0.12 | 0.53  | 0.14 | 4.37  | 10.14 | 100.36 | 0.385 | 0.026 | 0.589 | 0.003 |
| LCM-39 |    | 65.72 | 19.58 | 0.16 | 0.52  | 0.17 | 4.36  | 9.97  | 100.48 | 0.389 | 0.026 | 0.585 | 0.003 |
| LCM-39 |    | 65.66 | 19.19 | 0.11 | 0.54  | 0.19 | 4.40  | 10.19 | 100.27 | 0.386 | 0.026 | 0.588 | 0.003 |
| LCM-39 |    | 65.75 | 19.16 | 0.13 | 0.55  | 0.17 | 4.42  | 10.23 | 100.40 | 0.386 | 0.026 | 0.588 | 0.003 |
| LCM-39 |    | 64.56 | 19.57 | 0.20 | 0.54  | 1.18 | 4.10  | 10.06 | 100.21 | 0.373 | 0.027 | 0.601 | 0.021 |
| LCM-39 |    | 64.28 | 19.44 | 0.19 | 0.59  | 1.03 | 4.19  | 9.95  | 99.67  | 0.379 | 0.029 | 0.592 | 0.019 |
| LCM-39 |    | 65.79 | 20.78 | 0.45 | 1.52  | 0.95 | 8.74  | 2.86  | 101.08 | 0.762 | 0.073 | 0.164 | 0.016 |
| LCM-39 |    | 65.43 | 20.58 | 0.29 | 1.57  | 0.75 | 8.61  | 2.91  | 100.14 | 0.756 | 0.076 | 0.168 | 0.013 |
| LCM-39 |    | 65.45 | 20.51 | 0.38 | 1.57  | 0.78 | 8.63  | 2.88  | 100.20 | 0.757 | 0.076 | 0.166 | 0.014 |
| LCM-39 |    | 66.32 | 20.81 | 0.42 | 1.56  | 0.67 | 8.73  | 2.63  | 101.13 | 0.771 | 0.076 | 0.153 | 0.012 |
| LCM-39 |    | 65.40 | 20.81 | 0.35 | 1.60  | 0.82 | 8.53  | 2.89  | 100.40 | 0.754 | 0.078 | 0.168 | 0.014 |
| LCM-39 |    | 66.09 | 20.95 | 0.25 | 1.61  | 0.74 | 8.68  | 2.77  | 101.10 | 0.762 | 0.078 | 0.160 | 0.013 |
| LCM-39 |    | 65.65 | 20.99 | 0.38 | 1.66  | 0.85 | 8.62  | 2.81  | 100.96 | 0.757 | 0.081 | 0.162 | 0.015 |
| LCM-39 |    | 65.77 | 20.96 | 0.24 | 1.79  | 0.87 | 8.52  | 2.68  | 100.82 | 0.756 | 0.088 | 0.156 | 0.015 |
| LCM-39 |    | 64.87 | 20.97 | 0.32 | 1.83  | 0.91 | 8.64  | 2.64  | 100.19 | 0.759 | 0.089 | 0.153 | 0.016 |
| LCM-39 |    | 64.13 | 20.77 | 0.39 | 1.87  | 0.84 | 8.82  | 2.64  | 99.45  | 0.761 | 0.089 | 0.150 | 0.014 |
| LCM-39 |    | 64.02 | 21.32 | 0.28 | 2.28  | 0.75 | 8.66  | 2.33  | 99.63  | 0.756 | 0.110 | 0.134 | 0.013 |
| LCM-39 |    | 65.10 | 21.72 | 0.33 | 2.48  | 0.53 | 8.86  | 1.81  | 100.81 | 0.776 | 0.120 | 0.104 | 0.009 |
| LCM-39 |    | 64.90 | 21.58 | 0.22 | 2.77  | 0.01 | 9.28  | 1.38  | 100.14 | 0.792 | 0.131 | 0.078 | 0.000 |
| LCM-39 |    | 62.70 | 23.34 | 0.12 | 4.57  | 0.15 | 8.71  | 0.73  | 100.32 | 0.744 | 0.216 | 0.041 | 0.003 |
| LCM-39 |    | 61.15 | 23.90 | 0.43 | 5.44  | 0.15 | 8.01  | 0.73  | 99.79  | 0.697 | 0.261 | 0.042 | 0.003 |
| LCM-39 |    | 60.60 | 23.91 | 0.41 | 5.75  | 0.12 | 7.87  | 0.65  | 99.31  | 0.686 | 0.277 | 0.037 | 0.002 |
| LCM-39 |    | 60.60 | 24.45 | 0.37 | 5.89  | 0.16 | 7.83  | 0.65  | 99.94  | 0.680 | 0.283 | 0.037 | 0.003 |
| LCM-39 |    | 60.77 | 24.54 | 0.29 | 6.08  | 0.12 | 7.63  | 0.84  | 100.27 | 0.661 | 0.291 | 0.048 | 0.002 |
| LCM-39 |    | 60.20 | 24.75 | 0.32 | 6.17  | 0.15 | 7.65  | 0.81  | 100.05 | 0.660 | 0.294 | 0.046 | 0.003 |
| LCM-39 |    | 60.01 | 24.81 | 0.34 | 6.48  | 0.14 | 7.33  | 0.70  | 99.81  | 0.645 | 0.315 | 0.040 | 0.002 |
| LCM-39 |    | 59.31 | 25.04 | 0.45 | 6.65  | 0.14 | 7.44  | 0.70  | 99.72  | 0.643 | 0.318 | 0.040 | 0.002 |
| LCM-39 |    | 61.00 | 25.60 | 0.12 | 6.58  | 0.04 | 7.23  | 0.65  | 101.22 | 0.640 | 0.322 | 0.038 | 0.001 |
| LCM-39 |    | 59.62 | 25.15 | 0.34 | 6.83  | 0.11 | 7.17  | 0.65  | 99.87  | 0.631 | 0.332 | 0.038 | 0.002 |
| LCM-39 |    | 59.75 | 25.36 | 0.38 | 6.95  | 0.04 | 7.25  | 0.68  | 100.40 | 0.629 | 0.333 | 0.039 | 0.001 |
| LCM-39 |    | 59.57 | 25.36 | 0.30 | 6.99  | 0.10 | 7.10  | 0.66  | 100.07 | 0.623 | 0.339 | 0.038 | 0.002 |
| LCM-39 |    | 59.37 | 25.34 | 0.40 | 7.02  | 0.10 | 7.08  | 0.66  | 99.97  | 0.621 | 0.340 | 0.038 | 0.002 |
| LCM-39 |    | 59.68 | 25.66 | 0.33 | 7.06  | 0.11 | 7.08  | 0.66  | 100.57 | 0.620 | 0.342 | 0.038 | 0.002 |
| LCM-39 |    | 58.61 | 25.67 | 0.46 | 7.34  | 0.12 | 6.93  | 0.88  | 100.00 | 0.599 | 0.351 | 0.050 | 0.002 |
| LCM-40 | 3a | 60.55 | 24.17 | 0.52 | 5.59  | 0.23 | 7.77  | 0.95  | 99.78  | 0.677 | 0.269 | 0.054 | 0.004 |
| LCM-40 | 3b | 61.38 | 23.92 | 0.52 | 5.23  | 0.24 | 7.75  | 1.02  | 100.05 | 0.685 | 0.255 | 0.059 | 0.004 |
| LCM-40 | 3c | 60.76 | 24.33 | 0.41 | 5.62  | 0.23 | 7.67  | 0.89  | 99.91  | 0.675 | 0.273 | 0.052 | 0.004 |
| LCM-40 | 4a | 61.33 | 24.13 | 0.38 | 5.47  | 0.21 | 7.61  | 0.99  | 100.11 | 0.674 | 0.268 | 0.057 | 0.004 |
| LCM-40 | 4b | 60.90 | 23.85 | 0.56 | 5.30  | 0.22 | 7.80  | 0.97  | 99.60  | 0.686 | 0.258 | 0.056 | 0.004 |
| LCM-40 | 4c | 61.19 | 24.11 | 0.43 | 5.44  | 0.21 | 7.59  | 0.96  | 99.92  | 0.676 | 0.268 | 0.056 | 0.004 |
| LCM-40 | 6a | 60.10 | 24.58 | 0.49 | 5.92  | 0.23 | 7.42  | 0.86  | 99.60  | 0.659 | 0.291 | 0.050 | 0.004 |
| LCM-40 | 6b | 60.28 | 24.24 | 0.46 | 5.62  | 0.18 | 7.71  | 0.94  | 99.41  | 0.674 | 0.272 | 0.054 | 0.003 |
| LCM-40 | 6c | 60.57 | 24.35 | 0.34 | 5.72  | 0.22 | 7.55  | 0.91  | 99.67  | 0.668 | 0.279 | 0.053 | 0.004 |
| LCM-40 | 7a | 60.86 | 24.36 | 0.44 | 5.50  | 0.17 | 7.77  | 0.95  | 100.05 | 0.680 | 0.266 | 0.054 | 0.003 |
| LCM-40 | 7b | 60.69 | 24.30 | 0.52 | 5.61  | 0.16 | 7.63  | 0.91  | 99.82  | 0.673 | 0.274 | 0.053 | 0.003 |
| LCM-40 | 7c | 60.64 | 24.87 | 0.46 | 5.89  | 0.18 | 7.48  | 0.84  | 100.35 | 0.662 | 0.289 | 0.049 | 0.003 |
| LCM-40 | 8a | 69.24 | 18.99 | 0.25 | 0.14  | 0.05 | 10.92 | 0.38  | 99.96  | 0.971 | 0.007 | 0.022 | 0.001 |
| LCM-40 | 8c | 66.49 | 20.37 | 0.61 | 0.20  | 0.00 | 11.28 | 0.18  | 99.14  | 0.980 | 0.010 | 0.011 | 0.000 |
| LCM-40 | 9b | 61.77 | 24.29 | 0.45 | 5.55  | 0.21 | 7.69  | 0.97  | 100.93 | 0.675 | 0.269 | 0.056 | 0.004 |
| LCM-40 | 9c | 61.14 | 24.18 | 0.45 | 5.41  | 0.21 | 7.71  | 1.00  | 100.10 | 0.679 | 0.263 | 0.058 | 0.004 |
| LCM-9  |    | 60.06 | 24.24 | 0.67 | 5.66  | 0.09 | 7.36  | 0.86  | 98.94  | 0.666 | 0.283 | 0.051 | 0.002 |
| LCM-9  |    | 60.43 | 24.75 | 0.52 | 6.25  | 0.14 | 7.17  | 0.78  | 100.05 | 0.644 | 0.310 | 0.046 | 0.003 |
| LCM-9  |    | 57.23 | 26.31 | 0.42 | 8.11  | 0.05 | 6.64  | 0.46  | 99.21  | 0.581 | 0.392 | 0.026 | 0.001 |
| LCM-9  |    | 57.13 | 26.72 | 0.38 | 8.35  | 0.04 | 6.44  | 0.40  | 99.46  | 0.569 | 0.408 | 0.023 | 0.001 |
| LCM-9  |    | 57.36 | 26.74 | 0.31 | 8.37  | 0.04 | 6.28  | 0.67  | 99.77  | 0.553 | 0.408 | 0.039 | 0.001 |
| LCM-9  |    | 57.17 | 26.30 | 0.37 | 8.45  | 0.09 | 6.32  | 0.65  | 99.35  | 0.554 | 0.409 | 0.038 | 0.002 |
| LCM-9  |    | 57.17 | 26.91 | 0.34 | 8.37  | 0.05 | 6.39  | 0.43  | 99.65  | 0.565 | 0.410 | 0.025 | 0.001 |
| LCM-9  |    | 56.50 | 26.62 | 0.39 | 8.51  | 0.03 | 6.39  | 0.42  | 98.86  | 0.562 | 0.414 | 0.024 | 0.001 |
| LCM-9  |    | 58.00 | 26.85 | 0.35 | 8.43  | 0.02 | 6.33  | 0.40  | 100.38 | 0.563 | 0.414 | 0.023 | 0.000 |
| LCM-9  |    | 56.60 | 26.72 | 0.45 | 8.58  | 0.02 | 6.26  | 0.39  | 99.01  | 0.556 | 0.421 | 0.023 | 0.000 |
| LCM-9  |    | 56.35 | 26.58 | 0.26 | 8.84  | 0.08 | 6.30  | 0.38  | 98.80  | 0.551 | 0.427 | 0.022 | 0.001 |
| LCM-9  |    | 56.07 | 27.79 | 0.43 | 9.42  | 0.02 | 5.58  | 0.32  | 99.62  | 0.508 | 0.473 | 0.019 | 0.000 |
| LCM-9  |    | 54.47 | 27.94 | 0.80 | 10.14 | 0.08 | 5.11  | 0.77  | 99.30  | 0.455 | 0.500 | 0.045 | 0.001 |
| LCM-9  |    | 54.49 | 27.90 | 0.62 | 10.13 | 0.02 | 4.98  | 0.77  | 98.91  | 0.450 | 0.505 | 0.046 | 0.000 |
| LCM-9  |    | 52.00 | 30.07 | 1.02 | 12.51 | 0.00 | 3.76  | 0.38  | 99.73  | 0.344 | 0.633 | 0.023 | 0.000 |
| LCM-9  |    | 50.52 | 30.37 | 0.93 | 13.38 | 0.02 | 3.53  | 0.32  | 99.07  | 0.317 | 0.664 | 0.019 | 0.000 |
| DQW-21 |    | 67.58 | 19.06 | 0.37 | 0.18  | 0.01 | 6.51  | 7.23  | 100.94 | 0.573 | 0.009 | 0.419 | 0.000 |
| DQW-21 |    | 67.19 | 19.13 | 0.30 | 0.19  | 0.06 | 6.45  | 7.13  | 100.45 | 0.573 | 0.009 | 0.417 | 0.001 |
| DQW-21 |    | 66.85 | 18.87 | 0.31 | 0.20  | 0.05 | 6.56  | 7.12  | 99.96  | 0.578 | 0.010 | 0.413 | 0.001 |
| DQW-21 |    | 67.68 | 19.52 | 0.24 | 0.20  | 0.02 | 6.67  | 7.09  | 101.43 | 0.583 | 0.010 | 0.408 | 0.000 |

|        |       |       |      |      |      |      |      |        |       |       |       |       |
|--------|-------|-------|------|------|------|------|------|--------|-------|-------|-------|-------|
| DQW-21 | 66.93 | 18.96 | 0.25 | 0.21 | 0.07 | 6.79 | 7.12 | 100.32 | 0.586 | 0.010 | 0.404 | 0.001 |
| DQW-21 | 67.07 | 19.04 | 0.35 | 0.21 | 0.05 | 6.79 | 6.95 | 100.47 | 0.591 | 0.010 | 0.399 | 0.001 |
| DQW-21 | 67.46 | 19.17 | 0.35 | 0.22 | 0.06 | 6.80 | 6.84 | 100.90 | 0.595 | 0.011 | 0.394 | 0.001 |
| DQW-21 | 67.70 | 19.03 | 0.28 | 0.22 | 0.02 | 7.02 | 6.50 | 100.77 | 0.615 | 0.011 | 0.375 | 0.000 |
| DQW-21 | 67.24 | 18.92 | 0.46 | 0.22 | 0.04 | 6.76 | 6.99 | 100.63 | 0.589 | 0.011 | 0.401 | 0.001 |
| DQW-21 | 67.64 | 19.04 | 0.29 | 0.23 | 0.02 | 6.78 | 6.79 | 100.79 | 0.596 | 0.011 | 0.393 | 0.000 |
| DQW-21 | 67.21 | 18.84 | 0.28 | 0.23 | 0.05 | 6.65 | 6.95 | 100.22 | 0.586 | 0.011 | 0.403 | 0.001 |
| DQW-21 | 67.28 | 19.04 | 0.25 | 0.24 | 0.03 | 6.74 | 6.90 | 100.48 | 0.591 | 0.011 | 0.398 | 0.000 |
| DQW-21 | 67.41 | 19.30 | 0.22 | 0.24 | 0.01 | 6.83 | 6.75 | 100.76 | 0.599 | 0.011 | 0.389 | 0.000 |
| DQW-21 | 67.10 | 19.13 | 0.20 | 0.24 | 0.05 | 6.67 | 7.15 | 100.53 | 0.580 | 0.012 | 0.409 | 0.001 |
| DQW-21 | 67.08 | 18.97 | 0.37 | 0.24 | 0.01 | 6.02 | 8.12 | 100.81 | 0.523 | 0.012 | 0.465 | 0.000 |
| DQW-21 | 67.68 | 19.15 | 0.40 | 0.24 | 0.06 | 6.79 | 6.76 | 101.08 | 0.597 | 0.012 | 0.391 | 0.001 |
| DQW-21 | 67.03 | 18.97 | 0.35 | 0.25 | 0.06 | 6.82 | 6.83 | 100.32 | 0.596 | 0.012 | 0.392 | 0.001 |
| DQW-21 | 67.65 | 19.42 | 0.28 | 0.26 | 0.01 | 6.99 | 6.54 | 101.14 | 0.611 | 0.012 | 0.376 | 0.000 |
| DQW-21 | 67.51 | 19.25 | 0.24 | 0.25 | 0.03 | 6.67 | 6.78 | 100.72 | 0.592 | 0.012 | 0.396 | 0.001 |
| DQW-21 | 67.20 | 19.07 | 0.28 | 0.27 | 0.06 | 6.75 | 6.69 | 100.31 | 0.597 | 0.013 | 0.390 | 0.001 |
| DQW-21 | 66.57 | 19.16 | 0.17 | 0.28 | 0.21 | 6.07 | 7.58 | 100.02 | 0.541 | 0.014 | 0.445 | 0.004 |
| DQW-21 | 67.14 | 19.50 | 0.38 | 0.29 | 0.12 | 7.02 | 6.57 | 101.01 | 0.610 | 0.014 | 0.376 | 0.002 |
| DQW-21 | 66.67 | 19.49 | 0.24 | 0.32 | 0.18 | 7.11 | 6.50 | 100.51 | 0.615 | 0.015 | 0.370 | 0.003 |
| DQW-21 | 67.00 | 19.22 | 0.33 | 0.34 | 0.20 | 7.02 | 6.45 | 100.55 | 0.613 | 0.016 | 0.371 | 0.003 |
| DQW-21 | 66.72 | 19.26 | 0.31 | 0.36 | 0.14 | 7.14 | 6.16 | 100.11 | 0.627 | 0.018 | 0.356 | 0.003 |
| DQW-21 | 65.38 | 19.79 | 0.25 | 0.58 | 1.40 | 5.69 | 7.58 | 100.65 | 0.517 | 0.029 | 0.454 | 0.025 |
| DQW-21 | 65.90 | 21.71 | 0.27 | 2.52 | 0.09 | 9.08 | 1.59 | 101.17 | 0.788 | 0.121 | 0.091 | 0.002 |
| DQW-21 | 63.98 | 22.17 | 0.22 | 3.15 | 0.29 | 8.51 | 1.83 | 100.15 | 0.743 | 0.152 | 0.105 | 0.005 |
| DQW-21 | 64.48 | 22.92 | 0.25 | 3.51 | 0.22 | 8.94 | 0.98 | 101.30 | 0.776 | 0.168 | 0.056 | 0.004 |
| DQW-21 | 64.11 | 22.90 | 0.26 | 3.93 | 0.28 | 8.36 | 1.40 | 101.24 | 0.730 | 0.190 | 0.081 | 0.005 |
| DQW-21 | 62.69 | 22.86 | 0.29 | 4.17 | 0.25 | 8.52 | 1.18 | 99.95  | 0.735 | 0.199 | 0.067 | 0.004 |
| DQW-21 | 61.60 | 23.92 | 0.33 | 5.15 | 0.13 | 7.87 | 1.05 | 100.05 | 0.690 | 0.250 | 0.060 | 0.002 |
| DQW-21 | 60.92 | 24.22 | 0.33 | 5.49 | 0.17 | 7.88 | 0.95 | 99.97  | 0.683 | 0.263 | 0.054 | 0.003 |
| DQW-21 | 60.70 | 24.77 | 0.34 | 6.03 | 0.24 | 7.42 | 1.00 | 100.50 | 0.650 | 0.292 | 0.058 | 0.004 |
| DQW-21 | 61.32 | 24.92 | 0.43 | 5.97 | 0.23 | 7.31 | 1.02 | 101.20 | 0.648 | 0.293 | 0.059 | 0.004 |
| DQW-21 | 60.71 | 24.74 | 0.45 | 6.08 | 0.23 | 7.35 | 1.01 | 100.57 | 0.646 | 0.295 | 0.059 | 0.004 |
| DQW-21 | 60.02 | 25.12 | 0.39 | 6.57 | 0.33 | 7.30 | 0.90 | 100.62 | 0.634 | 0.315 | 0.051 | 0.006 |
| DQW-21 | 57.68 | 25.91 | 0.53 | 8.08 | 0.10 | 6.33 | 0.81 | 99.43  | 0.559 | 0.394 | 0.047 | 0.002 |
| DQW-21 | 58.69 | 26.91 | 0.35 | 8.48 | 0.00 | 6.36 | 0.49 | 101.28 | 0.559 | 0.412 | 0.028 | 0.000 |

**Electron microprobe analyses of biotite from volcanic ash beds in the Morrison Formation (wt%)**

| Sample | SiO <sub>2</sub> | TiO <sub>2</sub> | Al <sub>2</sub> O <sub>3</sub> | FeO   | MnO  | MgO   | CaO  | Na <sub>2</sub> O | K <sub>2</sub> O | BaO  | F    | Cl   | Sum   | H <sub>2</sub> O* | Total  |
|--------|------------------|------------------|--------------------------------|-------|------|-------|------|-------------------|------------------|------|------|------|-------|-------------------|--------|
| LCM-1  | 36.33            | 5.00             | 13.75                          | 15.86 | 0.27 | 13.70 | 0.01 | 0.47              | 8.82             | 1.33 | 0.48 | 0.17 | 95.96 | 3.59              | 99.54  |
| LCM-1  | 36.56            | 4.97             | 13.88                          | 16.09 | 0.25 | 13.93 | 0.01 | 0.49              | 8.97             | 1.18 | 0.58 | 0.18 | 96.80 | 3.58              | 100.38 |
| LCM-1  | 36.74            | 5.02             | 13.78                          | 16.67 | 0.25 | 14.35 | 0.00 | 0.39              | 9.19             | 0.54 | 0.74 | 0.21 | 97.53 | 3.55              | 101.08 |
| LCM-1  | 36.58            | 4.92             | 13.71                          | 16.51 | 0.22 | 14.33 | 0.01 | 0.41              | 9.28             | 0.52 | 1.00 | 0.17 | 97.21 | 3.41              | 100.62 |
| LCM-1  | 37.01            | 4.73             | 13.80                          | 15.64 | 0.23 | 14.30 | 0.00 | 0.45              | 9.00             | 0.61 | 0.59 | 0.17 | 96.24 | 3.59              | 99.83  |
| LCM-1  | 37.56            | 4.80             | 13.58                          | 15.53 | 0.29 | 14.29 | 0.04 | 0.42              | 9.15             | 0.66 | 0.40 | 0.19 | 96.68 | 3.68              | 100.36 |
| LCM-1  | 36.81            | 4.40             | 14.14                          | 14.73 | 0.27 | 14.83 | 0.01 | 0.49              | 9.10             | 0.95 | 1.50 | 0.05 | 96.64 | 3.19              | 99.83  |
| LCM-1  | 37.30            | 4.61             | 14.46                          | 14.66 | 0.23 | 15.09 | 0.00 | 0.44              | 9.11             | 0.97 | 1.61 | 0.07 | 97.86 | 3.19              | 101.05 |
| LCM-1  | 37.06            | 4.89             | 13.78                          | 15.96 | 0.27 | 14.24 | 0.00 | 0.42              | 9.24             | 0.43 | 0.47 | 0.21 | 96.73 | 3.65              | 100.38 |
| LCM-1  | 36.54            | 4.83             | 13.62                          | 15.64 | 0.24 | 14.07 | 0.01 | 0.46              | 9.04             | 0.61 | 0.60 | 0.15 | 95.50 | 3.55              | 99.05  |
| LCM-1  | 36.49            | 4.78             | 13.69                          | 15.80 | 0.32 | 14.12 | 0.00 | 0.41              | 9.17             | 0.55 | 0.55 | 0.17 | 95.76 | 3.58              | 99.34  |
| LCM-1  | 37.03            | 4.89             | 13.79                          | 16.41 | 0.26 | 14.42 | 0.00 | 0.44              | 9.29             | 0.55 | 0.85 | 0.19 | 97.70 | 3.50              | 101.20 |
| LCM-1  | 36.86            | 4.89             | 13.79                          | 16.08 | 0.28 | 14.19 | 0.00 | 0.40              | 9.20             | 0.54 | 0.89 | 0.19 | 96.88 | 3.45              | 100.33 |
| LCM-1  | 36.50            | 4.81             | 13.43                          | 15.09 | 0.23 | 14.63 | 0.03 | 0.50              | 9.07             | 0.67 | 0.82 | 0.10 | 95.51 | 3.46              | 98.97  |
| LCM-1  | 37.08            | 4.79             | 13.54                          | 15.18 | 0.43 | 14.87 | 0.02 | 0.48              | 9.23             | 0.59 | 0.63 | 0.10 | 96.64 | 3.61              | 100.25 |
| LCM-1  | 37.13            | 4.81             | 13.99                          | 15.42 | 0.47 | 14.79 | 0.02 | 0.49              | 9.00             | 0.74 | 0.70 | 0.11 | 97.36 | 3.60              | 100.96 |
| LCM-1  | 36.99            | 4.70             | 13.70                          | 15.36 | 0.24 | 14.49 | 0.00 | 0.47              | 8.91             | 0.72 | 0.66 | 0.17 | 96.08 | 3.55              | 99.63  |
| LCM-1  | 37.85            | 4.66             | 14.10                          | 12.42 | 0.08 | 17.00 | 0.00 | 0.52              | 9.23             | 0.55 | 3.00 | 0.17 | 98.27 | 2.55              | 100.82 |
| LCM-1  | 37.92            | 4.67             | 14.16                          | 10.92 | 0.06 | 17.69 | 0.02 | 0.47              | 9.30             | 0.58 | 3.10 | 0.19 | 97.72 | 2.49              | 100.21 |
| LCM-1  | 36.68            | 4.76             | 13.93                          | 15.90 | 0.17 | 14.62 | 0.00 | 0.42              | 9.05             | 0.90 | 1.08 | 0.18 | 97.19 | 3.38              | 100.57 |
| LCM-1  | 36.98            | 4.66             | 13.67                          | 15.79 | 0.19 | 14.27 | 0.00 | 0.38              | 8.96             | 0.64 | 0.77 | 0.18 | 96.10 | 3.49              | 99.59  |
| LCM-1  | 36.88            | 4.62             | 13.61                          | 15.36 | 0.24 | 14.61 | 0.00 | 0.56              | 9.12             | 0.46 | 0.67 | 0.15 | 95.96 | 3.55              | 99.51  |
| LCM-1  | 36.88            | 4.62             | 13.61                          | 15.36 | 0.24 | 14.61 | 0.00 | 0.56              | 9.12             | 0.46 | 1.79 | 0.25 | 96.68 | 2.99              | 99.67  |
| LCM-1  | 36.77            | 4.73             | 13.84                          | 15.22 | 0.24 | 14.65 | 0.01 | 0.53              | 8.70             | 1.02 | 0.71 | 0.10 | 96.19 | 3.55              | 99.74  |
| LCM-1  | 36.42            | 4.57             | 13.65                          | 15.60 | 0.30 | 14.40 | 0.00 | 0.50              | 8.79             | 0.80 | 1.13 | 0.10 | 95.75 | 3.32              | 99.07  |
| LCM-1  | 36.50            | 4.61             | 13.86                          | 15.44 | 0.34 | 14.45 | 0.00 | 0.55              | 8.76             | 1.03 | 0.82 | 0.11 | 96.11 | 3.48              | 99.58  |
| LCM-1  | 36.18            | 4.60             | 13.72                          | 15.76 | 0.25 | 14.07 | 0.01 | 0.55              | 8.74             | 0.86 | 0.97 | 0.09 | 95.37 | 3.38              | 98.75  |
| LCM-1  | 36.63            | 4.69             | 13.61                          | 15.50 | 0.26 | 14.82 | 0.00 | 0.56              | 8.82             | 1.17 | 0.98 | 0.11 | 96.70 | 3.42              | 100.12 |
| LCM-1  | 37.99            | 4.51             | 14.05                          | 14.27 | 0.28 | 15.44 | 0.02 | 0.56              | 8.91             | 0.83 | 1.41 | 0.10 | 97.73 | 3.29              | 101.02 |
| LCM-1  | 36.75            | 4.74             | 14.11                          | 15.94 | 0.35 | 14.87 | 0.00 | 0.52              | 8.89             | 0.99 | 0.72 | 0.10 | 97.66 | 3.60              | 101.26 |
| LCM-1  | 35.87            | 4.67             | 13.79                          | 15.72 | 0.20 | 13.92 | 0.00 | 0.55              | 8.99             | 1.00 | 0.95 | 0.10 | 95.33 | 3.36              | 98.69  |
| LCM-1  | 37.68            | 3.96             | 14.37                          | 14.24 | 0.34 | 15.39 | 0.00 | 0.36              | 8.28             | 0.76 | 0.53 | 0.09 | 95.75 | 3.70              | 99.45  |
| LCM-1  | 37.89            | 3.96             | 14.41                          | 14.44 | 0.17 | 15.62 | 0.00 | 0.70              | 8.72             | 0.53 | 0.53 | 0.11 | 96.83 | 3.72              | 100.55 |
| LCM-3  | 36.82            | 4.89             | 13.98                          | 14.30 | 0.36 | 15.05 | 0.04 | 0.46              | 8.31             | 0.92 | 0.35 | 0.08 | 95.37 | 3.74              | 99.11  |
| LCM-3  | 36.94            | 4.92             | 14.04                          | 14.16 | 0.31 | 15.14 | 0.04 | 0.47              | 8.30             | 1.05 | 0.41 | 0.08 | 95.66 | 3.72              | 99.38  |
| LCM-3  | 38.26            | 4.14             | 13.92                          | 12.35 | 0.28 | 16.88 | 0.08 | 0.61              | 8.01             | 1.07 | 0.77 | 0.05 | 96.07 | 3.63              | 99.70  |
| LCM-3  | 38.25            | 4.21             | 13.79                          | 12.37 | 0.34 | 16.97 | 0.05 | 0.61              | 8.07             | 1.13 | 0.85 | 0.07 | 96.33 | 3.59              | 99.92  |
| LCM-3  | 37.56            | 4.65             | 14.12                          | 13.49 | 0.19 | 15.47 | 0.04 | 0.64              | 8.10             | 0.87 | 0.39 | 0.08 | 95.41 | 3.74              | 99.15  |
| LCM-3  | 37.78            | 4.30             | 13.51                          | 11.71 | 0.33 | 16.73 | 0.04 | 0.67              | 8.22             | 1.13 | 0.94 | 0.05 | 95.00 | 3.48              | 98.48  |
| LCM-3  | 37.51            | 4.58             | 13.84                          | 14.30 | 0.33 | 14.56 | 0.00 | 0.43              | 8.61             | 1.06 | 0.45 | 0.07 | 95.52 | 3.67              | 99.19  |
| LCM-3  | 36.44            | 4.66             | 13.86                          | 14.48 | 0.36 | 14.25 | 0.06 | 0.44              | 8.52             | 1.01 | 0.38 | 0.06 | 94.35 | 3.65              | 98.01  |
| LCM-5  | 35.90            | 3.50             | 13.95                          | 19.36 | 0.44 | 12.60 | 0.06 | 0.24              | 8.09             | 0.33 | 0.37 | 0.08 | 94.74 | 3.67              | 98.41  |
| LCM-5  | 36.83            | 3.77             | 14.28                          | 17.83 | 0.42 | 12.79 | 0.03 | 0.13              | 8.44             | 0.27 | 0.47 | 0.11 | 95.13 | 3.64              | 98.77  |
| LCM-5  | 36.71            | 4.31             | 14.81                          | 13.74 | 0.34 | 15.23 | 0.05 | 0.62              | 8.48             | 1.06 | 0.40 | 0.09 | 95.65 | 3.72              | 99.37  |
| LCM-5  | 36.85            | 4.22             | 14.65                          | 13.88 | 0.32 | 15.32 | 0.04 | 0.53              | 8.41             | 1.10 | 0.33 | 0.08 | 95.57 | 3.76              | 99.33  |
| LCM-5  | 36.55            | 3.80             | 14.42                          | 15.32 | 0.35 | 14.07 | 0.00 | 0.43              | 8.82             | 1.06 | 0.30 | 0.08 | 95.04 | 3.71              | 98.75  |
| LCM-5  | 37.01            | 3.66             | 14.57                          | 14.89 | 0.33 | 14.40 | 0.01 | 0.43              | 8.77             | 1.25 | 0.29 | 0.08 | 95.56 | 3.74              | 99.30  |
| LCM-5  | 36.52            | 3.83             | 14.46                          | 14.94 | 0.29 | 14.22 | 0.01 | 0.42              | 8.70             | 1.10 | 0.25 | 0.09 | 94.71 | 3.72              | 98.43  |
| LCM-5  | 36.73            | 3.78             | 14.72                          | 15.47 | 0.31 | 14.40 | 0.00 | 0.44              | 8.77             | 1.11 | 0.35 | 0.07 | 95.97 | 3.74              | 99.71  |
| LCM-5  | 36.55            | 4.37             | 14.41                          | 13.81 | 0.29 | 15.19 | 0.01 | 0.53              | 8.66             | 1.57 | 0.38 | 0.08 | 95.66 | 3.71              | 99.37  |
| LCM-5  | 36.89            | 4.28             | 14.39                          | 13.38 | 0.32 | 15.40 | 0.03 | 0.51              | 8.61             | 1.75 | 0.34 | 0.08 | 95.81 | 3.73              | 99.54  |
| LCM-5  | 36.98            | 4.28             | 14.31                          | 13.24 | 0.26 | 15.37 | 0.04 | 0.54              | 8.39             | 1.73 | 0.39 | 0.06 | 95.41 | 3.71              | 99.12  |
| LCM-5  | 36.66            | 4.04             | 14.97                          | 13.78 | 0.33 | 15.60 | 0.02 | 0.53              | 8.41             | 1.89 | 0.44 | 0.04 | 96.51 | 3.74              | 100.25 |
| LCM-5  | 36.23            | 4.11             | 14.49                          | 13.83 | 0.33 | 15.31 | 0.00 | 0.61              | 8.68             | 1.82 | 0.34 | 0.04 | 95.64 | 3.72              | 99.36  |
| LCM-5  | 35.61            | 4.26             | 14.26                          | 14.10 | 0.31 | 15.34 | 0.01 | 0.51              | 8.61             | 1.69 | 0.38 | 0.05 | 94.98 | 3.68              | 98.66  |
| LCM-5  | 35.76            | 4.21             | 14.49                          | 13.83 | 0.29 | 15.52 | 0.00 | 0.53              | 8.63             | 1.79 | 0.37 | 0.04 | 95.30 | 3.70              | 99.00  |
| LCM-5  | 35.86            | 4.09             | 14.60                          | 13.80 | 0.35 | 15.64 | 0.01 | 0.53              | 8.56             | 1.78 | 0.34 | 0.03 | 95.43 | 3.73              | 99.16  |
| LCM-5  | 35.86            | 4.10             | 14.50                          | 13.59 | 0.33 | 15.31 | 0.00 | 0.52              | 8.69             | 1.63 | 0.35 | 0.04 | 94.76 | 3.70              | 98.46  |
| LCM-6  | 36.90            | 5.20             | 13.74                          | 13.43 | 0.18 | 15.81 | 0.02 | 0.76              | 8.54             |      | 0.72 | 0.10 | 95.08 | 3.57              | 98.65  |
| LCM-6  | 36.77            | 5.29             | 13.63                          | 13.54 | 0.23 | 15.87 | 0.00 | 0.75              | 8.49             |      | 0.69 | 0.08 | 95.04 | 3.59              | 98.63  |
| LCM-6  | 36.40            | 5.41             | 13.67                          | 13.45 | 0.19 | 16.00 | 0.00 | 0.77              | 8.66             |      | 0.86 | 0.08 | 95.11 | 3.50              | 98.61  |
| LCM-6  | 37.04            | 5.44             | 13.59                          | 12.91 | 0.18 | 16.04 | 0.01 | 0.78              | 8.69             |      | 0.88 | 0.10 | 95.27 | 3.49              | 98.76  |
| LCM-6  | 36.79            | 5.38             | 13.89                          | 13.22 | 0.20 | 15.38 | 0.02 | 0.80              | 8.53             |      | 0.78 | 0.08 | 94.72 | 3.52              | 98.24  |
| LCM-6  | 36.33            | 5.30             | 13.51                          | 13.32 | 0.26 | 16.08 | 0.02 | 0.78              | 8.84             |      | 0.74 | 0.07 | 94.91 | 3.55              | 98.46  |
| LCM-6  | 37.00            | 5.33             | 13.76                          | 13.50 | 0.26 | 16.37 | 0.01 | 0.77              | 8.73             |      | 0.66 | 0.07 | 96.16 | 3.65              | 99.81  |
| LCM-6  | 36.11            | 5.62             | 13.59                          | 13.86 | 0.24 | 15.46 | 0.00 | 0.76              | 8.66             |      | 0.77 | 0.07 | 94.79 | 3.52              | 98.31  |
| LCM-6  | 36.50            | 5.37             | 13.51                          | 13.09 | 0.29 | 15.86 | 0.04 | 0.77              | 8.64             |      | 0.73 | 0.08 | 94.55 | 3.54              | 98.09  |
| LCM-9  | 37.47            | 5.12             | 13.34                          | 12.72 | 0.21 | 16.36 | 0.02 | 0.77              | 8.65             | 1.22 | 1.29 | 0.05 | 96.68 | 3.32              | 100.00 |
| LCM-9  | 37.50            | 5.00             | 13.19                          | 12.12 | 0.23 | 16.52 | 0.03 | 0.75              | 8.65             | 1.21 | 1.42 | 0.06 | 96.05 | 3.24              | 99.29  |
| LCM-9  | 36.90            | 4.93             | 13.53                          | 15.08 | 0.39 | 14.60 | 0.00 | 0.57              | 9.00             | 0.89 | 0.83 | 0.14 | 96.47 | 3.48              | 99.95  |
| LCM-9  | 36.19            | 5.10             | 14.09                          | 15.70 | 0.48 | 14.21 | 0.03 | 0.56              | 9.00             | 0.95 | 0.63 | 0.13 | 96.78 | 3.58              | 100.36 |
| LCM-9  | 36.50            | 5.15             | 14.13                          | 15.82 | 0.48 | 14.36 | 0.03 | 0.55              | 8.93             | 0.90 | 0.63 | 0.13 | 97.32 | 3.61              | 100.93 |

|        |       |      |       |       |      |       |      |      |      |      |      |      |       |      |        |
|--------|-------|------|-------|-------|------|-------|------|------|------|------|------|------|-------|------|--------|
| LCM-9  | 37.99 | 4.99 | 13.50 | 12.04 | 0.23 | 16.25 | 0.11 | 0.74 | 8.21 | 1.25 | 1.31 | 0.07 | 96.12 | 3.31 | 99.43  |
| LCM-9  | 37.72 | 5.16 | 13.58 | 11.65 | 0.20 | 16.70 | 0.09 | 0.80 | 8.32 | 1.23 | 1.31 | 0.06 | 96.23 | 3.32 | 99.55  |
| LCM-9  | 38.04 | 4.93 | 13.14 | 11.64 | 0.27 | 16.70 | 0.00 | 0.77 | 8.69 | 0.90 | 1.42 | 0.07 | 95.95 | 3.25 | 99.20  |
| LCM-9  | 37.74 | 4.86 | 13.18 | 12.65 | 0.24 | 16.64 | 0.00 | 0.77 | 8.69 | 0.88 | 1.44 | 0.05 | 96.53 | 3.27 | 99.80  |
| LCM-9  | 38.06 | 5.12 | 13.50 | 12.15 | 0.29 | 17.06 | 0.10 | 0.75 | 8.34 | 1.22 | 1.43 | 0.05 | 97.44 | 3.32 | 100.76 |
| LCM-9  | 37.53 | 5.17 | 13.69 | 12.31 | 0.25 | 17.14 | 0.09 | 0.82 | 8.31 | 1.25 | 1.32 | 0.05 | 97.35 | 3.37 | 100.72 |
| LCM-9  | 37.68 | 5.02 | 13.45 | 12.06 | 0.19 | 16.82 | 0.11 | 0.81 | 8.18 | 1.05 | 1.28 | 0.04 | 96.14 | 3.35 | 99.49  |
| LCM-9  | 37.55 | 4.86 | 13.60 | 12.02 | 0.22 | 16.32 | 0.11 | 0.72 | 8.05 | 1.11 | 1.33 | 0.06 | 95.38 | 3.28 | 98.66  |
| LCM-9  | 36.94 | 5.02 | 13.24 | 12.19 | 0.27 | 16.63 | 0.11 | 0.62 | 7.94 | 0.99 | 1.34 | 0.10 | 94.79 | 3.26 | 98.05  |
| LCM-9  | 37.74 | 4.88 | 13.32 | 12.39 | 0.27 | 16.47 | 0.00 | 0.75 | 8.59 | 1.05 | 1.33 | 0.06 | 96.26 | 3.30 | 99.56  |
| LCM-9  | 37.88 | 4.85 | 13.20 | 12.29 | 0.18 | 16.67 | 0.00 | 0.76 | 8.59 | 1.01 | 1.33 | 0.07 | 96.26 | 3.30 | 99.56  |
| LCM-9  | 36.18 | 4.93 | 13.65 | 15.13 | 0.43 | 14.18 | 0.03 | 0.45 | 8.44 | 0.89 | 0.67 | 0.12 | 94.80 | 3.51 | 98.31  |
| LCM-13 | 37.56 | 4.66 | 14.48 | 14.44 | 0.43 | 14.81 | 0.12 | 0.58 | 8.48 |      | 1.58 | 0.05 | 96.51 | 3.21 | 99.72  |
| LCM-13 | 37.58 | 4.80 | 14.26 | 14.67 | 0.46 | 14.87 | 0.06 | 0.58 | 8.90 |      | 2.19 | 0.06 | 97.49 | 2.92 | 100.41 |
| LCM-13 | 36.63 | 5.06 | 13.93 | 14.38 | 0.52 | 14.61 | 0.11 | 0.59 | 8.20 |      | 0.93 | 0.05 | 94.61 | 3.45 | 98.06  |
| LCM-13 | 36.96 | 4.88 | 13.77 | 14.00 | 0.63 | 15.33 | 0.05 | 0.59 | 8.34 |      | 0.90 | 0.07 | 95.12 | 3.49 | 98.61  |
| LCM-13 | 37.10 | 4.94 | 13.77 | 13.84 | 0.64 | 15.47 | 0.07 | 0.63 | 8.32 |      | 1.00 | 0.05 | 95.38 | 3.46 | 98.84  |
| LCM-13 | 36.95 | 4.81 | 13.89 | 13.94 | 0.50 | 15.52 | 0.11 | 0.55 | 7.91 |      | 0.87 | 0.07 | 94.73 | 3.51 | 98.24  |
| LCM-13 | 37.12 | 5.17 | 13.96 | 15.25 | 0.36 | 14.76 | 0.09 | 0.46 | 8.13 |      | 0.63 | 0.03 | 95.68 | 3.65 | 99.33  |
| LCM-13 | 37.36 | 4.93 | 14.23 | 15.50 | 0.37 | 14.53 | 0.08 | 0.54 | 8.37 |      | 0.57 | 0.03 | 96.26 | 3.69 | 99.95  |
| LCM-13 | 37.17 | 4.67 | 14.49 | 14.04 | 0.44 | 14.84 | 0.13 | 0.57 | 8.51 |      | 1.74 | 0.06 | 95.92 | 3.10 | 99.02  |
| LCM-13 | 36.79 | 4.87 | 13.60 | 15.57 | 0.27 | 14.20 | 0.01 | 0.52 | 9.32 |      | 0.76 | 0.18 | 95.72 | 3.48 | 99.20  |
| LCM-13 | 37.05 | 4.87 | 13.51 | 16.30 | 0.22 | 14.48 | 0.02 | 0.54 | 9.35 |      | 1.30 | 0.15 | 97.20 | 3.28 | 100.48 |
| LCM-14 | 35.37 | 5.32 | 13.62 | 17.59 | 0.20 | 12.71 | 0.00 | 0.65 | 8.80 |      | 0.79 | 0.09 | 94.78 | 3.42 | 98.20  |
| LCM-14 | 35.37 | 5.28 | 13.35 | 17.65 | 0.17 | 12.76 | 0.00 | 0.65 | 8.88 |      | 0.87 | 0.12 | 94.71 | 3.37 | 98.08  |
| LCM-14 | 35.38 | 5.55 | 13.78 | 17.84 | 0.11 | 12.49 | 0.01 | 0.61 | 8.71 |      | 0.83 | 0.13 | 95.05 | 3.40 | 98.45  |
| LCM-14 | 35.47 | 5.55 | 13.81 | 18.05 | 0.19 | 12.37 | 0.00 | 0.65 | 8.90 |      | 0.86 | 0.11 | 95.58 | 3.40 | 98.98  |
| LCM-14 | 35.75 | 5.57 | 13.67 | 18.59 | 0.19 | 12.50 | 0.01 | 0.63 | 8.92 |      | 0.76 | 0.11 | 96.36 | 3.48 | 99.84  |
| LCM-14 | 35.33 | 5.53 | 13.38 | 18.47 | 0.11 | 11.83 | 0.03 | 0.61 | 9.12 |      | 0.90 | 0.11 | 95.01 | 3.33 | 98.34  |
| LCM-14 | 35.37 | 5.51 | 13.58 | 18.50 | 0.12 | 12.14 | 0.00 | 0.61 | 8.88 |      | 0.86 | 0.11 | 95.29 | 3.38 | 98.67  |
| LCM-14 | 34.76 | 6.08 | 13.51 | 20.33 | 0.19 | 10.88 | 0.01 | 0.57 | 8.66 |      | 0.81 | 0.14 | 95.57 | 3.37 | 98.94  |
| LCM-14 | 35.01 | 5.85 | 13.85 | 20.14 | 0.16 | 10.74 | 0.06 | 0.58 | 8.46 |      | 0.81 | 0.13 | 95.43 | 3.38 | 98.81  |
| LCM-14 | 35.56 | 5.32 | 13.62 | 17.30 | 0.15 | 12.63 | 0.01 | 0.65 | 8.83 |      | 0.81 | 0.09 | 94.61 | 3.40 | 98.01  |
| LCM-16 | 37.05 | 4.76 | 14.35 | 14.49 | 0.25 | 14.35 | 0.04 | 0.40 | 8.53 | 1.12 | 0.62 | 0.13 | 95.81 | 3.58 | 99.39  |
| LCM-16 | 36.55 | 4.84 | 13.93 | 14.71 | 0.25 | 14.44 | 0.01 | 0.41 | 8.69 | 1.12 | 0.62 | 0.14 | 95.43 | 3.55 | 98.98  |
| LCM-16 | 38.07 | 4.44 | 16.65 | 13.82 | 0.33 | 13.64 | 0.01 | 0.36 | 7.93 | 1.04 | 0.56 | 0.12 | 96.70 | 3.69 | 100.39 |
| LCM-16 | 36.67 | 4.76 | 14.00 | 13.20 | 0.43 | 15.47 | 0.02 | 0.50 | 8.33 | 1.10 | 0.90 | 0.07 | 95.04 | 3.46 | 98.51  |
| LCM-16 | 37.23 | 4.77 | 14.34 | 13.54 | 0.32 | 15.47 | 0.05 | 0.49 | 8.30 | 1.22 | 0.84 | 0.07 | 96.27 | 3.53 | 99.80  |
| LCM-16 | 36.83 | 4.89 | 13.89 | 13.73 | 0.39 | 14.97 | 0.02 | 0.56 | 8.33 | 1.38 | 0.94 | 0.07 | 95.58 | 3.43 | 99.01  |
| LCM-16 | 38.10 | 4.74 | 14.26 | 13.03 | 0.34 | 15.50 | 0.08 | 0.51 | 8.20 | 1.37 | 0.93 | 0.06 | 96.71 | 3.51 | 100.22 |
| LCM-16 | 37.24 | 4.86 | 14.09 | 13.57 | 0.38 | 14.92 | 0.04 | 0.54 | 8.24 | 1.39 | 0.88 | 0.09 | 95.83 | 3.47 | 99.30  |
| LCM-16 | 36.35 | 4.96 | 13.84 | 13.53 | 0.41 | 15.09 | 0.02 | 0.55 | 8.51 | 1.37 | 1.03 | 0.07 | 95.29 | 3.37 | 98.66  |
| LCM-16 | 37.06 | 4.96 | 14.07 | 13.37 | 0.40 | 15.31 | 0.04 | 0.52 | 8.35 | 1.52 | 0.92 | 0.08 | 96.18 | 3.47 | 99.65  |
| LCM-16 | 36.49 | 4.87 | 13.52 | 14.18 | 0.27 | 15.26 | 0.01 | 0.55 | 8.77 | 0.98 | 0.86 | 0.09 | 95.47 | 3.46 | 98.93  |
| LCM-16 | 36.66 | 4.89 | 13.75 | 13.68 | 0.38 | 15.17 | 0.02 | 0.55 | 8.72 | 1.20 | 0.83 | 0.09 | 95.56 | 3.48 | 99.04  |
| LCM-18 | 34.39 | 4.84 | 13.46 | 22.72 | 0.27 | 9.62  | 0.01 | 0.45 | 8.82 |      | 0.81 | 0.20 | 95.20 | 3.31 | 98.51  |
| LCM-18 | 34.92 | 4.74 | 13.31 | 22.68 | 0.22 | 9.75  | 0.03 | 0.43 | 8.90 |      | 0.84 | 0.20 | 95.61 | 3.31 | 98.92  |
| LCM-18 | 34.14 | 4.62 | 13.35 | 25.12 | 0.24 | 7.90  | 0.03 | 0.38 | 8.80 |      | 0.99 | 0.34 | 95.42 | 3.14 | 98.56  |
| LCM-18 | 35.10 | 4.73 | 13.15 | 22.43 | 0.39 | 9.62  | 0.04 | 0.45 | 8.70 |      | 0.94 | 0.23 | 95.31 | 3.25 | 98.56  |
| LCM-18 | 35.54 | 4.92 | 13.15 | 20.89 | 0.25 | 10.57 | 0.02 | 0.41 | 9.01 |      | 0.84 | 0.15 | 95.37 | 3.34 | 98.71  |
| LCM-18 | 36.30 | 4.76 | 13.28 | 20.37 | 0.21 | 10.31 | 0.03 | 0.41 | 8.83 |      | 0.86 | 0.15 | 95.11 | 3.32 | 98.43  |
| LCM-18 | 35.23 | 4.71 | 13.55 | 22.29 | 0.20 | 9.85  | 0.01 | 0.41 | 8.74 |      | 0.91 | 0.19 | 95.65 | 3.30 | 98.95  |
| LCM-18 | 34.09 | 4.68 | 13.37 | 24.92 | 0.32 | 7.93  | 0.04 | 0.38 | 8.63 |      | 0.92 | 0.23 | 95.07 | 3.20 | 98.27  |
| LCM-18 | 34.83 | 4.59 | 13.16 | 24.44 | 0.36 | 7.83  | 0.06 | 0.37 | 8.63 |      | 0.95 | 0.13 | 94.91 | 3.21 | 98.12  |
| LCM-18 | 34.97 | 4.87 | 13.18 | 22.44 | 0.24 | 9.71  | 0.01 | 0.43 | 8.78 |      | 0.81 | 0.21 | 95.26 | 3.31 | 98.57  |
| LCM-18 | 34.97 | 4.97 | 13.19 | 23.06 | 0.24 | 9.81  | 0.01 | 0.40 | 8.81 |      | 0.88 | 0.20 | 96.13 | 3.32 | 99.45  |
| LCM-18 | 34.74 | 4.76 | 13.15 | 22.52 | 0.28 | 9.62  | 0.03 | 0.44 | 8.73 |      | 0.90 | 0.19 | 94.94 | 3.26 | 98.19  |
| LCM-18 | 34.94 | 4.88 | 13.58 | 22.53 | 0.16 | 9.79  | 0.02 | 0.39 | 8.81 |      | 0.84 | 0.18 | 95.73 | 3.33 | 99.06  |
| LCM-18 | 34.14 | 4.54 | 13.16 | 25.67 | 0.38 | 7.85  | 0.00 | 0.38 | 8.83 |      | 0.87 | 0.34 | 95.70 | 3.20 | 98.90  |
| LCM-18 | 34.51 | 4.60 | 13.36 | 25.11 | 0.42 | 8.01  | 0.01 | 0.33 | 8.84 |      | 0.90 | 0.37 | 96.01 | 3.20 | 99.21  |
| LCM-18 | 34.31 | 4.70 | 13.31 | 24.98 | 0.31 | 7.99  | 0.05 | 0.37 | 8.63 |      | 0.87 | 0.32 | 95.39 | 3.21 | 98.60  |
| LCM-18 | 34.03 | 4.82 | 13.22 | 25.58 | 0.35 | 7.84  | 0.00 | 0.37 | 8.80 |      | 0.96 | 0.34 | 95.83 | 3.17 | 99.00  |
| LCM-18 | 35.33 | 4.32 | 14.04 | 20.50 | 0.11 | 10.86 | 0.00 | 0.58 | 8.40 | 1.05 | 0.85 | 0.12 | 95.77 | 3.36 | 99.13  |
| LCM-18 | 35.24 | 4.42 | 13.74 | 20.41 | 0.19 | 10.56 | 0.00 | 0.55 | 8.55 | 0.93 | 0.90 | 0.13 | 95.21 | 3.30 | 98.51  |
| LCM-18 | 34.90 | 4.33 | 13.33 | 24.87 | 0.35 | 7.91  | 0.00 | 0.38 | 8.62 | 0.76 | 0.89 | 0.30 | 96.21 | 3.21 | 99.42  |
| LCM-18 | 34.61 | 4.40 | 13.34 | 24.74 | 0.19 | 7.73  | 0.00 | 0.43 | 8.59 | 0.86 | 0.87 | 0.33 | 95.64 | 3.18 | 98.82  |
| LCM-18 | 34.30 | 4.46 | 13.48 | 24.34 | 0.25 | 7.83  | 0.02 | 0.60 | 8.47 | 0.87 | 0.86 | 0.26 | 95.31 | 3.20 | 98.51  |
| LCM-18 | 34.74 | 4.41 | 13.46 | 24.60 | 0.34 | 7.89  | 0.01 | 0.50 | 8.55 | 0.75 | 0.78 | 0.28 | 95.91 | 3.26 | 99.17  |
| LCM-18 | 36.65 | 4.34 | 13.76 | 18.35 | 0.16 | 12.27 | 0.00 | 0.48 | 8.48 | 0.93 | 0.93 | 0.13 | 96.05 | 3.37 | 99.42  |
| LCM-18 | 35.87 | 4.46 | 13.65 | 18.42 | 0.11 | 12.17 | 0.02 | 0.51 | 8.44 | 1.11 | 0.92 | 0.14 | 95.39 | 3.33 | 98.72  |
| LCM-18 | 35.31 | 4.43 | 13.64 | 21.68 | 0.21 | 9.88  | 0.00 | 0.78 | 8.43 | 0.98 | 0.78 | 0.13 | 95.89 | 3.35 | 99.24  |
| LCM-18 | 35.38 | 4.45 | 13.64 | 21.78 | 0.16 | 9.73  | 0.00 | 0.59 | 8.48 | 1.08 | 0.78 | 0.18 | 95.89 | 3.34 | 99.23  |
| LCM-18 | 34.69 | 4.45 | 13.44 | 24.63 | 0.35 | 7.81  | 0.00 | 0.42 | 8.45 | 1.25 | 0.86 | 0.28 | 96.21 | 3.22 | 99.43  |
| LCM-18 | 34.37 | 4.51 | 13.42 | 25.09 | 0.27 | 7.88  | 0.00 | 0.35 | 8.51 | 1.10 | 0.84 | 0.30 | 96.21 | 3.23 | 99.44  |
| LCM-18 | 34.77 | 4.48 | 13.39 | 25.08 | 0.26 | 7.87  | 0.00 | 0.37 | 8.55 | 0.83 | 0.91 | 0.28 | 96.34 | 3.21 | 99.55  |

|        |       |      |       |       |      |       |      |      |      |      |      |      |       |      |        |
|--------|-------|------|-------|-------|------|-------|------|------|------|------|------|------|-------|------|--------|
| LCM-18 | 34.55 | 4.39 | 13.38 | 24.44 | 0.24 | 7.87  | 0.00 | 0.42 | 8.64 | 0.85 | 0.89 | 0.30 | 95.54 | 3.18 | 98.72  |
| LCM-18 | 34.66 | 4.61 | 13.48 | 24.41 | 0.18 | 7.88  | 0.00 | 0.51 | 8.35 | 1.06 | 0.83 | 0.15 | 95.73 | 3.26 | 98.99  |
| LCM-18 | 34.40 | 4.41 | 13.12 | 24.19 | 0.30 | 7.86  | 0.02 | 0.42 | 8.30 | 1.07 | 0.93 | 0.28 | 94.86 | 3.14 | 98.00  |
| LCM-18 | 35.42 | 4.43 | 13.38 | 21.68 | 0.18 | 9.80  | 0.00 | 0.50 | 8.33 | 0.98 | 0.85 | 0.11 | 95.27 | 3.31 | 98.58  |
| LCM-18 | 35.11 | 4.48 | 13.62 | 22.48 | 0.23 | 9.86  | 0.00 | 0.41 | 7.97 | 0.93 | 0.76 | 0.21 | 95.69 | 3.36 | 99.05  |
| LCM-18 | 35.24 | 4.45 | 13.23 | 24.93 | 0.27 | 7.82  | 0.00 | 0.40 | 8.35 | 1.18 | 0.85 | 0.29 | 96.57 | 3.24 | 99.81  |
| LCM-19 | 35.00 | 4.45 | 13.48 | 24.43 | 0.39 | 8.07  | 0.06 | 0.32 | 8.54 | 0.42 | 0.68 | 0.33 | 95.80 | 3.32 | 99.12  |
| LCM-19 | 34.13 | 4.45 | 12.84 | 25.23 | 0.29 | 7.65  | 0.05 | 0.27 | 8.67 | 0.33 | 0.61 | 0.31 | 94.51 | 3.29 | 97.80  |
| LCM-19 | 34.67 | 4.68 | 13.49 | 25.97 | 0.34 | 7.68  | 0.06 | 0.33 | 8.59 | 1.24 | 0.67 | 0.34 | 97.69 | 3.34 | 101.03 |
| LCM-19 | 34.84 | 4.70 | 13.25 | 24.95 | 0.31 | 7.63  | 0.07 | 0.31 | 8.57 | 1.27 | 0.73 | 0.33 | 96.57 | 3.27 | 99.84  |
| LCM-19 | 34.91 | 4.62 | 13.50 | 25.72 | 0.35 | 7.82  | 0.00 | 0.28 | 8.64 | 0.99 | 0.72 | 0.35 | 97.53 | 3.33 | 100.86 |
| LCM-19 | 34.88 | 4.53 | 13.25 | 25.11 | 0.21 | 7.71  | 0.00 | 0.29 | 8.83 | 0.64 | 0.72 | 0.32 | 96.11 | 3.28 | 99.39  |
| LCM-20 | 36.88 | 4.67 | 14.36 | 18.10 | 0.27 | 12.67 | 0.04 | 0.43 | 8.33 | 1.17 | 0.78 | 0.13 | 97.46 | 3.51 | 100.97 |
| LCM-20 | 37.03 | 4.83 | 13.93 | 12.95 | 0.33 | 14.46 | 0.03 | 0.47 | 8.84 | 0.96 | 0.78 | 0.06 | 94.34 | 3.46 | 97.80  |
| LCM-20 | 34.86 | 4.89 | 13.49 | 21.34 | 0.25 | 8.94  | 0.02 | 0.31 | 8.59 | 1.11 | 0.61 | 0.30 | 94.39 | 3.31 | 97.70  |
| LCM-21 | 38.59 | 4.44 | 13.25 | 14.47 | 0.37 | 14.90 | 0.04 | 0.52 | 8.72 |      | 1.22 | 0.09 | 96.07 | 3.34 | 99.41  |
| LCM-21 | 36.97 | 4.62 | 13.19 | 15.07 | 0.50 | 14.85 | 0.00 | 0.52 | 9.04 |      | 1.16 | 0.09 | 95.51 | 3.33 | 98.84  |
| LCM-21 | 36.34 | 4.73 | 13.75 | 17.45 | 0.40 | 14.65 | 0.02 | 0.48 | 8.39 |      | 1.05 | 0.08 | 96.88 | 3.46 | 100.34 |
| LCM-21 | 36.87 | 4.76 | 13.25 | 14.61 | 0.37 | 14.72 | 0.00 | 0.50 | 9.09 |      | 1.16 | 0.08 | 94.89 | 3.30 | 98.19  |
| LCM-21 | 37.17 | 4.61 | 13.88 | 14.84 | 0.49 | 14.26 | 0.10 | 0.55 | 8.62 |      | 1.07 | 0.08 | 95.19 | 3.37 | 98.56  |
| LCM-21 | 36.50 | 4.77 | 13.90 | 15.46 | 0.48 | 14.28 | 0.00 | 0.53 | 9.28 |      | 1.09 | 0.07 | 95.89 | 3.36 | 99.25  |
| LCM-21 | 37.24 | 4.69 | 13.25 | 14.56 | 0.48 | 14.92 | 0.00 | 0.51 | 9.08 |      | 1.09 | 0.08 | 95.43 | 3.37 | 98.80  |
| LCM-21 | 37.08 | 4.64 | 13.65 | 14.65 | 0.46 | 14.74 | 0.00 | 0.55 | 9.18 |      | 1.08 | 0.08 | 95.63 | 3.37 | 99.00  |
| LCM-21 | 36.96 | 4.66 | 13.62 | 14.91 | 0.43 | 14.77 | 0.00 | 0.52 | 8.99 |      | 1.15 | 0.09 | 95.59 | 3.34 | 98.93  |
| LCM-21 | 37.31 | 4.55 | 13.44 | 14.71 | 0.45 | 15.14 | 0.00 | 0.54 | 9.01 |      | 1.21 | 0.09 | 95.90 | 3.34 | 99.24  |
| LCM-21 | 37.61 | 4.59 | 13.29 | 14.51 | 0.39 | 15.20 | 0.03 | 0.55 | 9.07 |      | 1.19 | 0.07 | 95.97 | 3.35 | 99.32  |
| LCM-21 | 36.99 | 4.65 | 13.58 | 15.07 | 0.48 | 14.57 | 0.00 | 0.52 | 9.02 |      | 1.14 | 0.08 | 95.60 | 3.34 | 98.94  |
| LCM-21 | 36.27 | 4.48 | 13.92 | 15.09 | 0.32 | 14.60 | 0.02 | 0.54 | 8.95 | 0.57 | 1.06 | 0.08 | 95.45 | 3.36 | 98.81  |
| LCM-21 | 36.74 | 4.45 | 13.55 | 14.75 | 0.40 | 14.81 | 0.00 | 0.49 | 8.74 | 0.84 | 1.11 | 0.08 | 95.49 | 3.34 | 98.83  |
| LCM-21 | 35.66 | 4.33 | 14.31 | 15.27 | 0.40 | 14.37 | 0.00 | 0.57 | 8.82 | 1.04 | 1.13 | 0.14 | 95.52 | 3.29 | 98.81  |
| LCM-21 | 36.17 | 4.31 | 14.21 | 15.38 | 0.39 | 14.38 | 0.00 | 0.54 | 8.74 | 0.90 | 1.03 | 0.04 | 95.65 | 3.39 | 99.04  |
| LCM-21 | 37.37 | 4.45 | 13.38 | 14.63 | 0.31 | 14.65 | 0.00 | 0.57 | 8.66 | 0.84 | 1.17 | 0.09 | 95.63 | 3.31 | 98.94  |
| LCM-21 | 37.40 | 4.48 | 13.48 | 14.78 | 0.34 | 15.18 | 0.00 | 0.50 | 8.79 | 0.83 | 1.16 | 0.09 | 96.53 | 3.36 | 99.89  |
| LCM-21 | 35.98 | 4.60 | 14.35 | 15.20 | 0.31 | 14.52 | 0.00 | 0.56 | 8.77 | 1.09 | 1.05 | 0.04 | 96.02 | 3.38 | 99.40  |
| LCM-21 | 35.85 | 4.50 | 14.27 | 15.68 | 0.41 | 14.06 | 0.00 | 0.52 | 8.62 | 1.16 | 1.02 | 0.08 | 95.73 | 3.37 | 99.10  |
| LCM-21 | 36.72 | 4.53 | 14.29 | 15.10 | 0.41 | 14.49 | 0.00 | 0.49 | 8.76 | 0.97 | 1.03 | 0.07 | 96.41 | 3.41 | 99.82  |
| LCM-21 | 37.13 | 4.47 | 13.31 | 14.88 | 0.35 | 14.87 | 0.00 | 0.53 | 8.81 | 0.86 | 0.99 | 0.10 | 95.84 | 3.40 | 99.24  |
| LCM-21 | 37.17 | 4.55 | 13.42 | 14.77 | 0.36 | 15.01 | 0.00 | 0.51 | 8.79 | 0.68 | 1.01 | 0.07 | 95.90 | 3.42 | 99.32  |
| LCM-21 | 37.08 | 4.51 | 13.40 | 14.49 | 0.46 | 14.55 | 0.00 | 0.56 | 8.71 | 0.73 | 1.07 | 0.08 | 95.17 | 3.34 | 98.51  |
| LCM-21 | 36.53 | 4.33 | 14.40 | 14.89 | 0.35 | 14.37 | 0.00 | 0.61 | 8.60 | 1.00 | 0.98 | 0.04 | 95.67 | 3.41 | 99.08  |
| LCM-21 | 36.65 | 4.48 | 14.63 | 15.05 | 0.37 | 15.01 | 0.00 | 0.55 | 8.68 | 0.99 | 1.09 | 0.07 | 97.10 | 3.43 | 100.53 |
| LCM-22 | 37.87 | 5.35 | 13.39 | 13.07 | 0.12 | 15.75 | 0.06 | 0.46 | 8.62 | 1.97 | 1.05 | 0.08 | 97.32 | 3.43 | 100.75 |
| LCM-22 | 37.89 | 5.55 | 13.20 | 12.67 | 0.25 | 15.79 | 0.03 | 0.49 | 8.50 | 2.11 | 1.22 | 0.06 | 97.23 | 3.34 | 100.57 |
| LCM-22 | 37.85 | 5.37 | 13.01 | 13.05 | 0.21 | 15.94 | 0.08 | 0.43 | 8.51 | 1.49 | 1.24 | 0.08 | 96.72 | 3.33 | 100.05 |
| LCM-22 | 37.09 | 5.31 | 12.99 | 12.69 | 0.19 | 15.54 | 0.05 | 0.46 | 8.39 | 1.75 | 1.26 | 0.08 | 95.25 | 3.25 | 98.50  |
| LCM-22 | 37.14 | 5.25 | 13.09 | 12.29 | 0.18 | 15.68 | 0.06 | 0.48 | 8.55 | 1.91 | 1.18 | 0.07 | 95.38 | 3.29 | 98.67  |
| LCM-22 | 38.15 | 5.29 | 13.10 | 11.73 | 0.21 | 16.32 | 0.11 | 0.46 | 8.38 | 1.70 | 1.35 | 0.08 | 96.29 | 3.28 | 99.57  |
| LCM-22 | 37.80 | 5.41 | 13.30 | 12.24 | 0.11 | 16.23 | 0.02 | 0.49 | 8.72 | 2.18 | 1.37 | 0.07 | 97.34 | 3.27 | 100.61 |
| LCM-22 | 37.45 | 5.29 | 13.15 | 12.20 | 0.16 | 15.79 | 0.00 | 0.50 | 8.62 | 2.00 | 1.30 | 0.07 | 95.97 | 3.26 | 99.23  |
| LCM-22 | 38.02 | 5.29 | 13.19 | 12.62 | 0.16 | 15.90 | 0.01 | 0.47 | 8.74 | 1.90 | 1.19 | 0.05 | 97.04 | 3.36 | 100.40 |
| LCM-22 | 37.54 | 5.34 | 13.10 | 12.30 | 0.24 | 16.24 | 0.03 | 0.48 | 8.64 | 2.04 | 1.25 | 0.06 | 96.72 | 3.32 | 100.04 |
| LCM-22 | 37.50 | 5.42 | 13.34 | 12.27 | 0.17 | 15.95 | 0.01 | 0.47 | 8.72 | 2.26 | 1.09 | 0.06 | 96.79 | 3.38 | 100.17 |
| LCM-22 | 37.17 | 5.27 | 13.32 | 13.65 | 0.21 | 15.22 | 0.00 | 0.50 | 8.83 | 1.52 | 1.12 | 0.11 | 96.41 | 3.34 | 99.75  |
| LCM-22 | 37.23 | 5.32 | 13.06 | 13.40 | 0.17 | 15.29 | 0.00 | 0.53 | 8.88 | 1.48 | 1.46 | 0.12 | 96.30 | 3.17 | 99.47  |
| LCM-22 | 36.38 | 5.25 | 13.08 | 14.34 | 0.27 | 14.63 | 0.00 | 0.57 | 8.90 | 1.47 | 1.09 | 0.11 | 95.60 | 3.30 | 98.90  |
| LCM-22 | 37.15 | 5.27 | 13.44 | 14.75 | 0.11 | 15.15 | 0.00 | 0.56 | 8.81 | 1.49 | 1.28 | 0.11 | 97.57 | 3.30 | 100.87 |
| LCM-22 | 37.65 | 5.36 | 13.20 | 12.62 | 0.20 | 15.61 | 0.05 | 0.46 | 8.54 | 1.88 | 1.11 | 0.07 | 96.27 | 3.36 | 99.63  |
| LCM-22 | 38.07 | 5.32 | 13.24 | 12.29 | 0.24 | 15.81 | 0.07 | 0.43 | 8.46 | 1.74 | 1.06 | 0.06 | 96.35 | 3.41 | 99.76  |
| LCM-22 | 37.55 | 5.39 | 13.21 | 12.93 | 0.20 | 15.69 | 0.10 | 0.43 | 8.30 | 1.67 | 1.13 | 0.05 | 96.16 | 3.37 | 99.53  |
| LCM-22 | 37.58 | 5.43 | 13.12 | 13.20 | 0.21 | 16.02 | 0.04 | 0.47 | 8.60 | 1.89 | 1.05 | 0.08 | 97.21 | 3.43 | 100.64 |
| LCM-22 | 37.69 | 5.32 | 13.26 | 12.95 | 0.23 | 16.11 | 0.02 | 0.45 | 8.63 | 1.89 | 1.16 | 0.07 | 97.27 | 3.38 | 100.65 |
| LCM-25 | 38.15 | 4.95 | 13.02 | 12.86 | 0.26 | 16.59 | 0.06 | 0.59 | 8.55 | 0.68 | 1.43 | 0.09 | 96.60 | 3.28 | 99.88  |
| LCM-25 | 38.22 | 4.97 | 13.01 | 12.95 | 0.34 | 16.42 | 0.06 | 0.56 | 8.45 | 0.63 | 1.51 | 0.07 | 96.54 | 3.24 | 99.78  |
| LCM-25 | 37.86 | 5.16 | 13.63 | 12.49 | 0.31 | 15.21 | 0.11 | 0.45 | 8.44 | 0.51 | 1.31 | 0.08 | 95.00 | 3.26 | 98.26  |
| LCM-25 | 38.12 | 5.18 | 13.85 | 12.32 | 0.29 | 15.09 | 0.12 | 0.46 | 8.06 | 0.52 | 1.22 | 0.09 | 94.78 | 3.31 | 98.09  |
| LCM-25 | 38.48 | 4.93 | 12.76 | 12.21 | 0.29 | 16.71 | 0.08 | 0.52 | 8.22 | 0.58 | 1.48 | 0.09 | 95.69 | 3.24 | 98.93  |
| LCM-25 | 38.12 | 4.87 | 12.96 | 12.46 | 0.29 | 16.66 | 0.04 | 0.59 | 8.25 | 0.60 | 1.45 | 0.09 | 95.74 | 3.25 | 98.99  |
| LCM-26 | 37.98 | 5.16 | 13.29 | 12.88 | 0.32 | 15.99 | 0.06 | 0.55 | 8.58 | 0.70 | 1.32 | 0.09 | 96.34 | 3.31 | 99.65  |
| LCM-26 | 36.87 | 4.78 | 13.60 | 15.50 | 0.32 | 15.58 | 0.11 | 0.53 | 7.92 | 0.66 | 1.32 | 0.08 | 96.70 | 3.33 | 100.03 |
| LCM-26 | 36.80 | 5.26 | 13.10 | 12.54 | 0.33 | 15.87 | 0.09 | 0.64 | 8.52 | 1.02 | 1.36 | 0.09 | 95.03 | 3.21 | 98.24  |
| LCM-26 | 36.63 | 4.89 | 14.54 | 14.08 | 0.33 | 16.14 | 0.02 | 0.55 | 8.73 | 0.83 | 1.28 | 0.04 | 97.51 | 3.39 | 100.90 |
| LCM-29 | 36.91 | 4.14 | 14.10 | 15.93 | 0.26 | 14.18 | 0.05 | 0.52 | 8.11 | 0.60 | 0.41 | 0.10 | 95.10 | 3.69 | 98.79  |
| LCM-29 | 37.06 | 4.24 | 14.14 | 14.79 | 0.28 | 14.31 | 0.06 | 0.46 | 8.23 | 0.47 | 0.69 | 0.10 | 94.49 | 3.54 | 98.03  |
| LCM-30 | 34.97 | 4.61 | 13.56 | 24.67 | 0.20 | 8.75  | 0.01 | 0.44 | 8.83 |      | 0.76 | 0.21 | 96.64 | 3.36 | 100.00 |
| LCM-30 | 34.63 | 4.59 | 13.33 | 23.92 | 0.25 | 8.47  | 0.00 | 0.42 | 8.86 |      | 0.79 | 0.21 | 95.09 | 3.28 | 98.37  |



|        |       |      |       |       |      |       |      |      |      |      |      |      |       |      |       |
|--------|-------|------|-------|-------|------|-------|------|------|------|------|------|------|-------|------|-------|
| LCM-30 | 34.30 | 4.42 | 13.50 | 24.08 | 0.18 | 9.42  | 0.12 | 0.40 | 8.05 |      | 0.67 | 0.19 | 94.98 | 3.39 | 98.37 |
| LCM-30 | 34.70 | 4.29 | 13.79 | 21.76 | 0.23 | 9.32  | 0.09 | 0.41 | 7.91 |      | 0.73 | 0.18 | 93.06 | 3.31 | 96.37 |
| LCM-31 | 36.10 | 3.98 | 14.11 | 18.75 | 0.32 | 12.16 | 0.01 | 0.45 | 8.83 | 1.12 | 0.32 | 0.13 | 96.12 | 3.66 | 99.78 |
| LCM-31 | 35.16 | 3.82 | 13.93 | 20.33 | 0.37 | 11.54 | 0.00 | 0.38 | 8.83 | 0.95 | 1.04 | 0.12 | 96.00 | 3.28 | 99.28 |
| LCM-31 | 35.87 | 3.97 | 14.28 | 18.55 | 0.34 | 11.31 | 0.00 | 0.53 | 8.96 | 0.98 | 0.27 | 0.11 | 95.04 | 3.62 | 98.66 |
| LCM-31 | 35.32 | 4.00 | 14.08 | 19.77 | 0.44 | 11.12 | 0.00 | 0.48 | 8.92 | 0.92 | 0.26 | 0.11 | 95.28 | 3.64 | 98.92 |
| LCM-31 | 36.13 | 3.97 | 14.02 | 18.78 | 0.40 | 11.42 | 0.00 | 0.51 | 8.76 | 0.94 | 0.21 | 0.12 | 95.15 | 3.66 | 98.81 |
| LCM-31 | 35.04 | 4.02 | 14.80 | 19.18 | 0.35 | 11.14 | 0.00 | 0.50 | 8.81 | 0.91 | 0.32 | 0.14 | 95.03 | 3.60 | 98.63 |
| LCM-31 | 37.22 | 4.67 | 13.32 | 13.12 | 0.40 | 15.74 | 0.04 | 0.38 | 8.20 | 1.14 | 1.23 | 0.07 | 94.99 | 3.31 | 98.31 |
| LCM-31 | 37.83 | 4.55 | 13.36 | 13.27 | 0.26 | 15.72 | 0.00 | 0.38 | 8.53 | 1.35 | 1.14 | 0.09 | 95.99 | 3.36 | 99.35 |
| LCM-35 | 33.72 | 7.10 | 13.83 | 19.88 | 0.25 | 9.57  | 0.00 | 0.56 | 7.83 | 2.97 | 0.48 | 0.08 | 96.04 | 3.46 | 99.50 |
| LCM-35 | 33.46 | 7.11 | 13.98 | 18.88 | 0.20 | 9.46  | 0.01 | 0.52 | 7.93 | 3.02 | 0.48 | 0.08 | 94.90 | 3.41 | 98.31 |

H2O\* = H2O alulated on the assumption that the OH site is full

|  |  |  |
|--|--|--|
|  |  |  |
|--|--|--|

| Electron microprobe analyses of pyroxene from volcanic ash beds in the Morrison Formation (wt%) |          |       |      |       |       |      |       |       |      |        | End Members  |           |              |
|-------------------------------------------------------------------------------------------------|----------|-------|------|-------|-------|------|-------|-------|------|--------|--------------|-----------|--------------|
| Samp #                                                                                          | Grain    | SiO2  | TiO2 | Al2O3 | FeO t | MnO  | MgO   | CaO   | Na2O | Total  | Wollastonite | Enstatite | Ferrosillite |
| MC-8                                                                                            | 1 core   | 48.12 | 0.47 | 4.08  | 13.80 | 0.89 | 8.94  | 21.83 | 1.24 | 99.37  | 0.477        | 0.272     | 0.251        |
| MC-8                                                                                            | 1 rim    | 49.31 | 0.34 | 3.66  | 13.98 | 1.07 | 8.73  | 21.45 | 1.22 | 99.79  | 0.473        | 0.268     | 0.259        |
| MC-8                                                                                            | 3 core   | 50.75 | 0.33 | 2.75  | 13.27 | 0.78 | 9.23  | 19.47 | 2.64 | 99.23  | 0.450        | 0.297     | 0.254        |
| MC-8                                                                                            | 3 rim    | 50.37 | 0.38 | 2.37  | 11.91 | 0.73 | 10.02 | 20.82 | 1.88 | 98.47  | 0.466        | 0.312     | 0.221        |
| MC-8                                                                                            | 4 core   | 50.52 | 0.36 | 2.37  | 11.25 | 1.12 | 10.83 | 22.15 | 0.93 | 99.52  | 0.473        | 0.321     | 0.206        |
| MC-8                                                                                            | 4 rim    | 51.93 | 0.19 | 1.94  | 10.99 | 1.32 | 11.43 | 22.05 | 0.81 | 100.66 | 0.464        | 0.334     | 0.202        |
| MC-8                                                                                            | 5 core   | 50.01 | 0.37 | 2.27  | 12.05 | 0.87 | 10.16 | 20.94 | 1.88 | 98.52  | 0.464        | 0.313     | 0.223        |
| MC-8                                                                                            | 5 rim    | 51.06 | 0.37 | 2.23  | 11.89 | 0.93 | 10.76 | 21.07 | 1.76 | 100.07 | 0.457        | 0.325     | 0.218        |
| MC-8                                                                                            | 6 core   | 50.99 | 0.15 | 1.57  | 10.84 | 1.19 | 11.20 | 22.34 | 0.81 | 99.08  | 0.472        | 0.329     | 0.199        |
| MC-8                                                                                            | 8 core   | 49.18 | 0.24 | 2.61  | 12.98 | 1.49 | 9.47  | 21.59 | 1.16 | 98.72  | 0.469        | 0.286     | 0.246        |
| MC-8                                                                                            | 10 core  | 50.10 | 0.26 | 2.58  | 12.64 | 1.26 | 9.90  | 21.80 | 1.08 | 99.61  | 0.470        | 0.297     | 0.234        |
| MC-8                                                                                            | 10 core2 | 50.10 | 0.21 | 2.01  | 11.50 | 1.24 | 10.95 | 22.10 | 0.90 | 99.01  | 0.467        | 0.322     | 0.211        |
| MC-8                                                                                            | 16 core  | 46.87 | 0.78 | 4.70  | 13.80 | 1.02 | 8.29  | 21.38 | 1.37 | 98.20  | 0.481        | 0.259     | 0.260        |
| MC-8                                                                                            | 18       | 48.52 | 0.48 | 3.82  | 13.50 | 0.98 | 8.99  | 21.51 | 1.38 | 99.18  | 0.474        | 0.276     | 0.250        |
| MC-27.5                                                                                         | 1 core   | 52.31 | 0.17 | 1.15  | 8.86  | 0.67 | 13.49 | 21.78 | 0.33 | 98.78  | 0.454        | 0.391     | 0.155        |
| MC-27.5                                                                                         | 1 b rim  | 52.55 | 0.16 | 1.24  | 9.02  | 0.64 | 13.72 | 21.67 | 0.35 | 99.36  | 0.449        | 0.395     | 0.156        |
| MC-27.5                                                                                         | 1 c core | 52.20 | 0.19 | 1.39  | 9.12  | 0.70 | 13.09 | 21.64 | 0.38 | 98.69  | 0.455        | 0.383     | 0.161        |
| MC-27.5                                                                                         | 1 e core | 52.29 | 0.15 | 0.98  | 9.00  | 0.67 | 13.69 | 21.72 | 0.34 | 98.83  | 0.450        | 0.394     | 0.156        |
| MC-36.5                                                                                         | 2 core   | 49.74 | 0.33 | 3.33  | 12.12 | 0.58 | 9.77  | 21.88 | 1.40 | 99.15  | 0.482        | 0.299     | 0.219        |
| MC-36.5                                                                                         | 2 core3  | 48.45 | 0.43 | 3.90  | 12.31 | 0.53 | 9.39  | 21.99 | 1.25 | 98.26  | 0.488        | 0.290     | 0.222        |
| MC-36.5                                                                                         | 2 rim    | 47.55 | 0.48 | 4.88  | 13.59 | 0.60 | 8.52  | 21.36 | 1.72 | 98.71  | 0.482        | 0.268     | 0.250        |
| MC-36.5                                                                                         | 19 rim   | 43.83 | 1.04 | 8.19  | 12.30 | 0.39 | 8.95  | 22.83 | 0.67 | 98.19  | 0.505        | 0.276     | 0.219        |

**Electron microprobe analyses of amphibole from volcanic ash beds in the Morrison Formation (wt%)**

| Sample | Grain    | Location              | SiO2  | TiO2 | Al2O3 | FeOt  | MnO  | MgO   | CaO   | Na2O | K2O  | F    | Cl   | Subsum | H2O  | Total  |
|--------|----------|-----------------------|-------|------|-------|-------|------|-------|-------|------|------|------|------|--------|------|--------|
| LCM-32 | amph1.1  | Little Cedar Mountain | 47.00 | 1.33 | 7.31  | 13.65 | 0.55 | 13.75 | 11.36 | 1.41 | 0.81 | 0.39 | 0.13 | 97.49  | 1.83 | 99.33  |
| LCM-32 | amph1.2  | Little Cedar Mountain | 46.38 | 1.32 | 7.07  | 13.56 | 0.51 | 13.68 | 11.44 | 1.40 | 0.81 | 0.36 | 0.13 | 96.46  | 1.82 | 98.28  |
| LCM-32 | amph1.3  | Little Cedar Mountain | 46.98 | 1.32 | 7.54  | 14.26 | 0.56 | 13.64 | 11.39 | 1.37 | 0.95 | 0.38 | 0.13 | 98.31  | 1.85 | 100.16 |
| LCM-32 | amph2.1  | Little Cedar Mountain | 46.09 | 1.40 | 7.63  | 13.97 | 0.62 | 13.33 | 11.51 | 1.50 | 0.89 | 0.52 | 0.15 | 97.35  | 1.75 | 99.10  |
| LCM-32 | amph2.2  | Little Cedar Mountain | 46.48 | 1.36 | 7.72  | 13.75 | 0.59 | 13.66 | 11.41 | 1.43 | 0.91 | 0.41 | 0.11 | 97.62  | 1.83 | 99.45  |
| LCM-32 | amph2.3  | Little Cedar Mountain | 46.02 | 1.48 | 7.98  | 14.22 | 0.46 | 13.30 | 11.40 | 1.42 | 0.94 | 0.34 | 0.14 | 97.53  | 1.84 | 99.37  |
| LCM-32 | amph2.4  | Little Cedar Mountain | 45.62 | 1.43 | 7.59  | 13.75 | 0.49 | 13.24 | 11.47 | 1.49 | 0.91 | 0.49 | 0.14 | 96.37  | 1.74 | 98.12  |
| LCM-32 | amph3.1  | Little Cedar Mountain | 46.88 | 1.26 | 7.07  | 13.55 | 0.54 | 13.91 | 11.37 | 1.49 | 0.96 | 0.32 | 0.16 | 97.34  | 1.85 | 99.19  |
| LCM-32 | amph3.2  | Little Cedar Mountain | 45.84 | 1.33 | 7.72  | 13.57 | 0.59 | 13.43 | 11.26 | 1.41 | 0.86 | 0.49 | 0.13 | 96.38  | 1.76 | 98.14  |
| LCM-32 | amph3.3  | Little Cedar Mountain | 47.26 | 1.21 | 6.46  | 12.74 | 0.47 | 14.20 | 11.59 | 1.28 | 0.69 | 0.46 | 0.11 | 96.26  | 1.78 | 98.04  |
| LCM-32 | amph3.4  | Little Cedar Mountain | 47.25 | 1.23 | 6.70  | 13.35 | 0.53 | 14.12 | 11.31 | 1.38 | 0.79 | 0.41 | 0.12 | 97.00  | 1.82 | 98.82  |
| LCM-32 | amph3.5  | Little Cedar Mountain | 47.50 | 1.27 | 6.78  | 13.22 | 0.58 | 14.15 | 11.33 | 1.35 | 0.78 | 0.42 | 0.12 | 97.28  | 1.82 | 99.10  |
| LCM-32 | amph4.1  | Little Cedar Mountain | 45.59 | 1.49 | 8.06  | 14.06 | 0.55 | 13.37 | 11.48 | 1.50 | 0.93 | 0.41 | 0.14 | 97.39  | 1.81 | 99.19  |
| LCM-32 | amph4.2  | Little Cedar Mountain | 46.61 | 1.36 | 7.14  | 13.51 | 0.62 | 13.89 | 11.35 | 1.33 | 0.78 | 0.43 | 0.13 | 96.93  | 1.81 | 98.73  |
| LCM-32 | amph4.3  | Little Cedar Mountain | 45.72 | 1.36 | 7.48  | 14.01 | 0.53 | 13.33 | 11.45 | 1.42 | 0.87 | 0.46 | 0.12 | 96.51  | 1.77 | 98.28  |
| LCM-32 | amph4.5  | Little Cedar Mountain | 46.67 | 1.37 | 7.26  | 13.87 | 0.60 | 13.66 | 11.45 | 1.42 | 0.83 | 0.40 | 0.12 | 97.46  | 1.83 | 99.29  |
| LCM-32 | amph5.3  | Little Cedar Mountain | 44.81 | 1.54 | 8.35  | 14.19 | 0.44 | 12.73 | 11.45 | 1.51 | 0.97 | 0.38 | 0.14 | 96.34  | 1.79 | 98.13  |
| LCM-32 | am1a     | Little Cedar Mountain | 45.12 | 1.63 | 8.14  | 15.09 | 0.70 | 12.64 | 11.34 | 1.51 | 1.00 | 0.38 | 0.13 | 97.48  | 1.82 | 99.30  |
| LCM-32 | am1b rim | Little Cedar Mountain | 47.00 | 1.28 | 6.90  | 13.53 | 0.64 | 13.77 | 11.48 | 1.33 | 0.76 | 0.41 | 0.11 | 97.02  | 1.82 | 98.84  |
| LCM-32 | am2a c   | Little Cedar Mountain | 45.03 | 1.49 | 8.11  | 15.15 | 0.69 | 12.92 | 11.30 | 1.48 | 0.98 | 0.35 | 0.13 | 97.45  | 1.83 | 99.28  |
| LCM-32 | am2b r   | Little Cedar Mountain | 46.53 | 1.27 | 7.16  | 13.99 | 0.59 | 13.46 | 11.46 | 1.34 | 0.85 | 0.42 | 0.10 | 96.97  | 1.81 | 98.78  |
| LCM-32 | am3a c   | Little Cedar Mountain | 45.24 | 1.49 | 8.36  | 15.22 | 0.60 | 12.83 | 11.40 | 1.52 | 1.03 | 0.37 | 0.15 | 98.02  | 1.83 | 99.85  |
| LCM-32 | am3b r   | Little Cedar Mountain | 47.35 | 1.15 | 6.59  | 13.53 | 0.79 | 13.77 | 11.48 | 1.17 | 0.74 | 0.48 | 0.09 | 96.90  | 1.79 | 98.69  |
| LCM-32 | am4a c   | Little Cedar Mountain | 45.19 | 1.70 | 8.92  | 14.82 | 0.62 | 12.59 | 11.46 | 1.51 | 1.04 | 0.41 | 0.12 | 98.18  | 1.82 | 100.00 |
| LCM-32 | am4b r   | Little Cedar Mountain | 46.73 | 1.32 | 6.88  | 13.17 | 0.68 | 13.92 | 11.58 | 1.36 | 0.83 | 0.43 | 0.09 | 96.79  | 1.80 | 98.59  |
| LCM-32 | am5b c   | Little Cedar Mountain | 46.72 | 1.38 | 7.30  | 14.40 | 0.69 | 13.57 | 11.45 | 1.41 | 0.87 | 0.44 | 0.10 | 98.13  | 1.82 | 99.95  |
| LCM-32 | am6c     | Little Cedar Mountain | 46.41 | 1.36 | 7.43  | 14.41 | 0.77 | 13.27 | 11.52 | 1.38 | 0.89 | 0.47 | 0.13 | 97.81  | 1.79 | 99.59  |
| LCM-32 | am6e     | Little Cedar Mountain | 45.98 | 1.40 | 7.54  | 14.16 | 0.70 | 13.18 | 11.47 | 1.38 | 0.88 | 0.42 | 0.12 | 97.02  | 1.80 | 98.83  |
| LCM-32 | am7c     | Little Cedar Mountain | 46.35 | 1.42 | 7.61  | 14.42 | 0.67 | 13.02 | 11.58 | 1.43 | 0.86 | 0.42 | 0.10 | 97.68  | 1.81 | 99.49  |
| LCM-32 | am7e     | Little Cedar Mountain | 45.49 | 1.47 | 7.64  | 14.58 | 0.68 | 12.85 | 11.46 | 1.40 | 0.93 | 0.44 | 0.12 | 96.83  | 1.78 | 98.61  |
| LCM-32 | am8c     | Little Cedar Mountain | 45.41 | 1.49 | 7.91  | 14.08 | 0.69 | 12.74 | 11.64 | 1.47 | 0.94 | 0.47 | 0.13 | 96.74  | 1.75 | 98.50  |
| LCM-32 | am8r     | Little Cedar Mountain | 47.97 | 1.28 | 6.63  | 13.37 | 0.58 | 14.15 | 11.59 | 1.20 | 0.71 | 0.42 | 0.08 | 97.78  | 1.84 | 99.62  |
| LCM-32 | am10c    | Little Cedar Mountain | 48.24 | 1.13 | 6.33  | 13.64 | 0.65 | 14.23 | 11.48 | 1.17 | 0.65 | 0.49 | 0.07 | 97.86  | 1.82 | 99.67  |
| LCM-32 | am10r    | Little Cedar Mountain | 46.62 | 1.42 | 7.59  | 13.70 | 0.58 | 13.52 | 11.57 | 1.41 | 0.78 | 0.41 | 0.09 | 97.50  | 1.83 | 99.33  |
| LCM-32 | am11c    | Little Cedar Mountain | 46.18 | 1.34 | 7.48  | 14.22 | 0.64 | 13.22 | 11.56 | 1.38 | 0.89 | 0.48 | 0.11 | 97.26  | 1.78 | 99.03  |
| LCM-32 | am11r    | Little Cedar Mountain | 45.11 | 1.44 | 7.80  | 14.89 | 0.75 | 12.74 | 11.38 | 1.49 | 0.89 | 0.45 | 0.11 | 96.83  | 1.77 | 98.60  |
| LCM-32 | am12c    | Little Cedar Mountain | 46.54 | 1.29 | 7.23  | 13.91 | 0.72 | 13.26 | 11.58 | 1.37 | 0.81 | 0.47 | 0.10 | 97.07  | 1.78 | 98.84  |
| LCM-32 | am12r    | Little Cedar Mountain | 45.23 | 1.48 | 8.10  | 14.64 | 0.72 | 12.74 | 11.41 | 1.51 | 0.96 | 0.45 | 0.13 | 97.14  | 1.77 | 98.91  |
| LCM-32 | am13r    | Little Cedar Mountain | 44.60 | 1.77 | 8.78  | 14.78 | 0.71 | 12.15 | 11.51 | 1.54 | 1.08 | 0.42 | 0.14 | 97.28  | 1.78 | 99.06  |
| LCM-32 | am13r    | Little Cedar Mountain | 45.47 | 1.47 | 7.88  | 14.50 | 0.66 | 12.84 | 11.54 | 1.46 | 0.93 | 0.40 | 0.12 | 97.07  | 1.80 | 98.87  |
| LCM-32 | am14c    | Little Cedar Mountain | 45.70 | 1.45 | 7.86  | 14.63 | 0.71 | 12.90 | 11.48 | 1.47 | 1.02 | 0.39 | 0.13 | 97.55  | 1.81 | 99.36  |
| LCM-32 | am14r    | Little Cedar Mountain | 44.94 | 1.45 | 8.41  | 14.54 | 0.65 | 12.52 | 11.55 | 1.54 | 1.00 | 0.38 | 0.13 | 96.92  | 1.80 | 98.72  |
| LCM-32 | am15c    | Little Cedar Mountain | 45.66 | 1.54 | 7.93  | 14.63 | 0.67 | 12.94 | 11.43 | 1.44 | 0.96 | 0.34 | 0.11 | 97.48  | 1.84 | 99.32  |
| LCM-32 | am15r    | Little Cedar Mountain | 44.88 | 1.60 | 8.33  | 14.58 | 0.61 | 12.30 | 11.61 | 1.52 | 0.98 | 0.68 | 0.11 | 96.89  | 1.65 | 98.55  |
| LCM-32 | am16c    | Little Cedar Mountain | 46.30 | 1.41 | 7.81  | 14.21 | 0.67 | 13.07 | 11.41 | 1.49 | 0.88 | 0.58 | 0.12 | 97.67  | 1.73 | 99.41  |
| LCM-32 | am16e    | Little Cedar Mountain | 45.91 | 1.43 | 8.36  | 14.90 | 0.74 | 13.14 | 11.46 | 1.54 | 0.95 | 0.44 | 0.12 | 98.78  | 1.83 | 100.60 |
| LCM-32 | am17c    | Little Cedar Mountain | 46.27 | 1.49 | 7.63  | 14.28 | 0.80 | 12.94 | 11.56 | 1.44 | 0.85 | 0.37 | 0.10 | 97.55  | 1.83 | 99.38  |
| LCM-32 | am17r    | Little Cedar Mountain | 45.97 | 1.50 | 7.90  | 14.50 | 0.59 | 13.03 | 11.51 | 1.46 | 0.95 | 0.47 | 0.13 | 97.75  | 1.78 | 99.54  |
| LCM-32 | am18c    | Little Cedar Mountain | 46.61 | 1.43 | 7.75  | 14.17 | 0.67 | 13.46 | 11.44 | 1.40 | 0.86 | 0.43 | 0.11 | 98.10  | 1.82 | 99.93  |
| LCM-32 | am18e    | Little Cedar Mountain | 45.88 | 1.53 | 8.21  | 14.71 | 0.72 | 12.87 | 11.49 | 1.45 | 0.96 | 0.36 | 0.12 | 98.13  | 1.85 | 99.98  |
| LCM-32 | am19c    | Little Cedar Mountain | 46.71 | 1.35 | 7.30  | 13.98 | 0.72 | 13.75 | 11.53 | 1.34 | 0.84 | 0.47 | 0.11 | 97.88  | 1.80 | 99.68  |
| LCM-32 | am19e    | Little Cedar Mountain | 45.53 | 1.44 | 7.83  | 13.88 | 0.67 | 13.10 | 11.58 | 1.48 | 0.92 | 0.46 | 0.13 | 96.79  | 1.77 | 98.56  |
| LCM-32 | am20c    | Little Cedar Mountain | 44.99 | 1.54 | 8.48  | 14.63 | 0.69 | 12.38 | 11.40 | 1.53 | 1.06 | 0.44 | 0.15 | 97.08  | 1.77 | 98.84  |
| LCM-32 | am20e    | Little Cedar Mountain | 46.83 | 1.30 | 7.02  | 14.24 | 0.64 | 13.50 | 11.46 | 1.39 | 0.83 | 0.51 | 0.08 | 97.56  | 1.78 | 99.34  |
| LCM-32 | am21c    | Little Cedar Mountain | 47.63 | 1.28 | 6.87  | 13.74 | 0.69 | 13.47 | 11.53 | 1.27 | 0.77 | 0.48 | 0.10 | 97.60  | 1.79 | 99.39  |
| LCM-32 | am21r    | Little Cedar Mountain | 46.71 | 1.31 | 7.07  | 14.30 | 0.68 | 13.32 | 11.60 | 1.37 | 0.85 | 0.44 | 0.11 | 97.54  | 1.80 | 99.34  |
| LCM-32 | am22c    | Little Cedar Mountain | 47.08 | 1.40 | 7.48  | 14.37 | 0.64 | 13.57 | 11.52 | 1.33 | 0.83 | 0.38 | 0.10 | 98.50  | 1.87 | 100.37 |
| LCM-32 | am22r    | Little Cedar Mountain | 46.14 | 1.35 | 7.23  | 14.09 | 0.71 | 13.29 | 11.51 | 1.37 | 0.84 | 0.42 | 0.12 | 96.87  | 1.80 | 98.66  |
| LCM-32 | am23c    | Little Cedar Mountain | 47.45 | 1.24 | 6.95  | 13.54 | 0.79 | 14.06 | 11.51 | 1.26 | 0.77 | 0.50 | 0.10 | 97.93  | 1.80 | 99.73  |
| LCM-32 | am23r    | Little Cedar Mountain | 47.63 | 1.23 | 6.39  | 13.15 | 0.62 | 14.05 | 11.70 | 1.34 | 0.69 | 0.39 | 0.09 | 97.09  | 1.83 | 98.93  |
| LCM-32 | am24r    | Little Cedar Mountain | 45.98 | 1.41 | 7.65  | 14.33 | 0.74 | 13.23 | 11.53 | 1.50 | 0.89 | 0.38 | 0.11 | 97.58  | 1.83 | 99.41  |
| LCM-32 | am24c    | Little Cedar Mountain | 46.69 | 1.33 | 7.54  | 14.18 | 0.67 | 13.34 | 11.44 | 1.38 | 0.80 | 0.40 | 0.10 | 97.68  | 1.84 | 99.51  |
| LCM-32 | am25c    | Little Cedar Mountain | 46.02 | 1.36 | 7.69  | 14.40 | 0.65 | 13.01 | 11.56 | 1.39 | 0.94 | 0.39 | 0.11 | 97.32  | 1.82 | 99.14  |
| LCM-32 | am25r    | Little Cedar Mountain | 43.85 | 1.66 | 8.67  | 15.04 | 0.68 | 12.22 | 11.46 | 1.61 | 1.03 | 0.45 | 0.14 | 96.59  | 1.75 | 98.34  |
| LCM-32 | am26r    | Little Cedar Mountain | 46.75 | 1.34 | 7.01  | 13.78 | 0.65 | 13.35 | 11.53 | 1.34 | 0.81 | 0.45 | 0.11 | 96.90  | 1.79 | 98.69  |
|        |          |                       |       |      |       |       |      |       |       |      |      |      |      |        |      |        |
| MC-8   | 12 core  | Montezuma Creek       | 39.66 | 1.55 | 11.35 | 19.55 | 0.93 | 8.84  | 11.10 | 2.30 | 1.72 | 0.30 | 0.01 | 97.18  | 1.80 | 98.98  |
| MC-8   | 13 rim   | Montezuma Creek       | 37.96 | 1.79 | 13.62 | 20.58 | 0.77 | 7.60  | 11.08 | 2.44 | 1.85 | 0.33 | 0.00 | 97.88  | 1.79 | 99.67  |
| MC-8   | 15 core  | Montezuma Creek       | 37.33 | 1.57 | 13.24 | 21.08 | 0.81 | 7.46  | 11.11 | 2.16 | 2.35 | 0.24 | 0.02 | 97.26  | 1.80 | 99.07  |
| MC-8   | 15 rim   | Montezuma Creek       | 36.98 | 1.60 | 13.05 | 20.58 | 0.76 | 7.61  | 11.16 | 2.12 | 2.33 | 0.28 | 0.00 | 96.35  | 1.77 | 98.12  |
| MC-8   | 17       | Montezuma Creek       | 39.30 | 1.77 | 11.01 | 19.11 | 1.02 | 8.75  | 11.19 | 2.38 | 1.75 | 0.62 | 0.01 | 96.63  | 1.63 | 98.26  |
| MC-8   | 20 core  | Montezuma Creek       | 37.55 | 2.01 | 12.79 | 20.11 | 0.80 | 7.67  | 11.11 | 2.14 | 2.22 | 0.28 | 0.03 | 96.59  | 1.77 | 98.36  |
| MC-8   | 20 rim   | Montezuma Creek       | 37.33 | 1.72 | 12.94 | 20.36 | 0.82 | 7.70  | 11.03 | 2.10 | 2.16 | 0.26 | 0.03 | 96.34  | 1.78 | 98.12  |
| MC-8   | 23 rim   | Montezuma Creek       | 37.73 | 1.94 | 13.07 | 21.11 | 0.78 | 7.90  | 11.11 | 2.17 | 1.90 | 0.33 | 0.01 | 96.89  | 1.77 | 98.67  |
| MC-8   | 24 core  | Montezuma Creek       | 39.21 | 1.56 | 12.17 |       |      |       |       |      |      |      |      |        |      |        |

|         |          |                 |       |      |       |       |      |       |       |      |      |      |      |       |      |        |
|---------|----------|-----------------|-------|------|-------|-------|------|-------|-------|------|------|------|------|-------|------|--------|
| MC-27.5 | 2 core   | Montezuma Creek | 45.07 | 2.41 | 9.60  | 12.72 | 0.21 | 14.29 | 10.88 | 1.77 | 0.82 | 0.53 | 0.05 | 98.09 | 1.82 | 99.91  |
| MC-27.5 | 3 rim    | Montezuma Creek | 44.84 | 1.62 | 8.74  | 15.88 | 0.41 | 12.34 | 11.05 | 1.49 | 0.97 | 0.31 | 0.11 | 97.60 | 1.87 | 99.47  |
| MC-27.5 | 3 core   | Montezuma Creek | 44.80 | 1.62 | 8.46  | 15.28 | 0.38 | 12.68 | 11.09 | 1.43 | 0.99 | 0.29 | 0.12 | 96.99 | 1.86 | 98.85  |
| MC-27.5 | 4 core   | Montezuma Creek | 45.10 | 1.72 | 9.60  | 13.78 | 0.29 | 13.99 | 10.62 | 1.75 | 0.68 | 0.53 | 0.06 | 97.86 | 1.82 | 99.68  |
| MC-27.5 | 5 b core | Montezuma Creek | 39.83 | 1.10 | 12.65 | 24.84 | 0.61 | 6.16  | 8.59  | 1.85 | 1.76 | 0.45 | 0.06 | 97.69 | 1.75 | 99.44  |
| MC-27.5 | 6 rim    | Montezuma Creek | 45.39 | 1.74 | 8.93  | 13.96 | 0.40 | 13.65 | 10.86 | 1.40 | 0.97 | 0.32 | 0.13 | 97.57 | 1.88 | 99.45  |
| MC-27.5 | 7        | Montezuma Creek | 45.74 | 1.75 | 8.12  | 13.12 | 0.36 | 14.24 | 11.03 | 1.40 | 0.75 | 0.32 | 0.09 | 96.77 | 1.88 | 98.64  |
| MC-27.5 | 8 core   | Montezuma Creek | 47.14 | 1.63 | 7.73  | 12.43 | 0.38 | 15.07 | 10.90 | 1.31 | 0.66 | 0.28 | 0.08 | 97.46 | 1.94 | 99.40  |
| MC-27.5 | 8 rim    | Montezuma Creek | 46.48 | 1.73 | 8.16  | 12.58 | 0.34 | 14.73 | 10.81 | 1.40 | 0.71 | 0.39 | 0.07 | 97.21 | 1.88 | 99.08  |
| MC-27.5 | 22 core  | Montezuma Creek | 44.20 | 1.71 | 9.14  | 14.98 | 0.50 | 12.64 | 10.96 | 1.44 | 1.08 | 0.29 | 0.12 | 96.91 | 1.86 | 98.77  |
| MC-27.5 | 22 rim   | Montezuma Creek | 44.27 | 1.72 | 9.35  | 13.90 | 0.45 | 13.89 | 10.93 | 1.31 | 1.05 | 0.38 | 0.08 | 97.14 | 1.86 | 99.00  |
| MC-27.5 | 27       | Montezuma Creek | 43.98 | 2.52 | 10.24 | 12.08 | 0.26 | 14.62 | 10.89 | 1.81 | 0.84 | 0.52 | 0.04 | 97.57 | 1.82 | 99.39  |
| MC-27.5 | 28 b     | Montezuma Creek | 44.84 | 1.70 | 8.95  | 13.49 | 0.34 | 13.99 | 10.69 | 1.59 | 0.66 | 0.55 | 0.04 | 96.59 | 1.78 | 98.37  |
| MC-27.5 | 29       | Montezuma Creek | 44.97 | 1.75 | 8.89  | 12.94 | 0.36 | 14.26 | 10.91 | 1.35 | 0.94 | 0.30 | 0.10 | 96.63 | 1.89 | 98.52  |
|         |          |                 |       |      |       |       |      |       |       |      |      |      |      |       |      |        |
| MC-36.5 | 4 core   | Montezuma Creek | 38.73 | 1.96 | 14.00 | 19.20 | 0.60 | 8.19  | 11.16 | 2.58 | 1.78 | 0.19 | 0.02 | 98.33 | 1.87 | 100.20 |
| MC-36.5 | 4 rim    | Montezuma Creek | 38.36 | 1.68 | 13.70 | 20.08 | 0.64 | 7.54  | 10.96 | 2.64 | 1.57 | 0.36 | 0.02 | 97.38 | 1.77 | 99.15  |
| MC-36.5 | 7 core   | Montezuma Creek | 37.86 | 1.91 | 14.00 | 18.76 | 0.52 | 8.20  | 11.46 | 2.67 | 1.44 | 0.26 | 0.00 | 96.96 | 1.81 | 98.77  |
| MC-36.5 | 7 rim    | Montezuma Creek | 38.02 | 1.89 | 13.77 | 19.12 | 0.64 | 7.82  | 11.20 | 2.43 | 1.57 | 0.23 | 0.01 | 96.60 | 1.82 | 98.42  |
| MC-36.5 | 8 rim2   | Montezuma Creek | 38.68 | 1.61 | 13.46 | 19.45 | 0.58 | 8.15  | 11.16 | 2.68 | 1.85 | 0.25 | 0.01 | 97.78 | 1.83 | 99.61  |
| MC-36.5 | 16 core  | Montezuma Creek | 37.96 | 1.59 | 13.58 | 18.73 | 0.48 | 8.72  | 11.26 | 2.73 | 1.44 | 0.22 | 0.01 | 96.62 | 1.83 | 98.45  |
|         |          | Montezuma Creek |       |      |       |       |      |       |       |      |      |      |      |       |      |        |
| MC-47   | 1 core   | Montezuma Creek | 48.10 | 1.06 | 6.10  | 13.32 | 0.52 | 14.42 | 11.43 | 1.13 | 0.58 | 0.33 | 0.07 | 96.90 | 1.88 | 98.78  |
| MC-47   | 4 core   | Montezuma Creek | 46.89 | 1.61 | 7.44  | 12.17 | 0.47 | 14.98 | 11.13 | 1.32 | 0.65 | 0.35 | 0.07 | 96.91 | 1.89 | 98.80  |
| MC-47   | 4 rim    | Montezuma Creek | 47.65 | 1.72 | 8.07  | 12.44 | 0.38 | 15.39 | 10.83 | 1.31 | 0.67 | 0.37 | 0.08 | 98.73 | 1.93 | 100.66 |
| MC-47   | 5        | Montezuma Creek | 51.26 | 0.67 | 4.53  | 12.47 | 0.62 | 15.85 | 11.51 | 0.60 | 0.37 | 0.26 | 0.05 | 98.06 | 1.98 | 100.04 |
| MC-47   | 7 rim    | Montezuma Creek | 47.84 | 1.61 | 7.64  | 12.30 | 0.40 | 15.23 | 11.02 | 1.29 | 0.70 | 0.33 | 0.09 | 98.29 | 1.93 | 100.22 |
| MC-47   | 8 rim    | Montezuma Creek | 48.92 | 0.95 | 5.82  | 12.75 | 0.62 | 14.78 | 11.46 | 0.97 | 0.54 | 0.23 | 0.05 | 96.98 | 1.94 | 98.92  |
| MC-47   | 9 rim    | Montezuma Creek | 45.07 | 2.06 | 8.69  | 12.93 | 0.35 | 13.90 | 11.01 | 1.54 | 0.78 | 0.41 | 0.08 | 96.62 | 1.83 | 98.45  |
| MC-47   | 10 rim   | Montezuma Creek | 44.93 | 1.35 | 11.72 | 10.27 | 0.08 | 15.29 | 10.70 | 1.94 | 0.49 | 0.13 | 0.04 | 96.87 | 2.03 | 98.90  |

**Electron microprobe analyses of titanite from volcanic ash beds in the Morrison Formation (wt%)**

| Sample | Grain Spot | SiO2  | TiO2  | Al2O3 | FeO  | MnO  | MgO  | CaO   | Nb2O5 | Ta2O5 | Y2O3 | La2O3 | Ce2O3 | Nd2O3 | Sm2O3 | F    | Sum   | O=F  | Total |
|--------|------------|-------|-------|-------|------|------|------|-------|-------|-------|------|-------|-------|-------|-------|------|-------|------|-------|
| LCM-1  | a a.2      | 28.77 | 33.44 | 1.51  | 2.33 | 0.13 | 0.05 | 24.64 | 0.32  |       | 1.02 | 0.50  | 2.01  | 1.41  | 1.39  | 0.39 | 97.90 | 0.16 | 97.74 |
| LCM-1  | a a.3      | 29.57 | 34.51 | 1.46  | 2.07 | 0.15 | 0.03 | 25.72 | 0.18  |       | 0.54 | 0.50  | 1.42  | 0.83  | 0.93  | 0.38 | 98.27 | 0.16 | 98.11 |
| LCM-1  | a a.4      | 29.17 | 34.42 | 1.39  | 1.96 | 0.12 | 0.02 | 25.04 | 0.32  |       | 0.85 | 0.44  | 1.66  | 1.22  | 1.27  | 0.27 | 98.13 | 0.11 | 98.02 |
| LCM-1  | a a.5      | 29.41 | 34.46 | 1.53  | 2.05 | 0.12 | 0.02 | 25.14 | 0.23  |       | 0.86 | 0.35  | 1.60  | 1.15  | 1.27  | 0.32 | 98.50 | 0.13 | 98.37 |
| LCM-1  | b b.1      | 29.48 | 35.88 | 1.31  | 1.78 | 0.11 | 0.02 | 26.63 | 0.24  |       | 0.34 | 0.41  | 1.25  | 0.44  | 0.47  | 0.38 | 98.73 | 0.16 | 98.57 |
| LCM-1  | b b.2      | 29.74 | 35.71 | 1.27  | 1.77 | 0.13 | 0.03 | 26.67 | 0.18  |       | 0.28 | 0.40  | 1.34  | 0.47  | 0.43  | 0.44 | 98.86 | 0.18 | 98.67 |
| LCM-1  | b b.3      | 29.50 | 36.03 | 1.18  | 1.58 | 0.13 | 0.01 | 26.37 | 0.24  |       | 0.29 | 0.39  | 1.25  | 0.52  | 0.44  | 0.33 | 98.25 | 0.14 | 98.11 |
| LCM-1  | b b.4      | 29.56 | 35.31 | 1.26  | 1.90 | 0.14 | 0.01 | 26.24 | 0.22  |       | 0.43 | 0.34  | 1.40  | 0.61  | 0.66  | 0.38 | 98.45 | 0.16 | 98.29 |
| LCM-1  | c c.1      | 29.32 | 34.66 | 1.41  | 1.87 | 0.17 | 0.01 | 26.11 | 0.20  |       | 0.43 | 0.34  | 1.18  | 0.52  | 0.57  | 0.37 | 97.16 | 0.16 | 97.00 |
| LCM-1  | c c.2      | 29.28 | 34.83 | 1.32  | 1.80 | 0.13 | 0.01 | 25.80 | 0.23  |       | 0.59 | 0.32  | 1.50  | 0.79  | 0.86  | 0.31 | 97.77 | 0.13 | 97.64 |
| LCM-1  | c c.3      | 29.54 | 34.47 | 1.43  | 1.91 | 0.13 | 0.01 | 25.69 | 0.15  |       | 0.58 | 0.44  | 1.44  | 0.77  | 0.81  | 0.41 | 97.78 | 0.17 | 97.60 |
| LCM-1  | c c.4      | 29.35 | 35.14 | 1.15  | 1.70 | 0.13 | 0.01 | 25.24 | 0.29  |       | 0.72 | 0.47  | 1.59  | 0.96  | 0.97  | 0.22 | 97.94 | 0.09 | 97.85 |
| LCM-1  | d d.1      | 29.53 | 35.39 | 1.26  | 1.55 | 0.21 | 0.02 | 26.05 | 0.69  |       | 0.51 | 0.41  | 1.51  | 0.74  | 0.79  | 0.24 | 98.87 | 0.10 | 98.77 |
| LCM-1  | d d.2      | 29.59 | 35.33 | 1.27  | 1.79 | 0.24 | 0.04 | 26.23 | 0.42  |       | 0.58 | 0.32  | 1.15  | 0.61  | 0.76  | 0.29 | 98.62 | 0.12 | 98.50 |
| LCM-1  | d d.3      | 29.72 | 34.47 | 1.29  | 1.89 | 0.25 | 0.02 | 26.27 | 0.45  |       | 0.56 | 0.26  | 1.13  | 0.65  | 0.65  | 0.39 | 97.99 | 0.16 | 97.82 |
| LCM-1  | d d.4      | 29.60 | 34.67 | 1.36  | 1.94 | 0.22 | 0.02 | 26.10 | 0.42  |       | 0.57 | 0.32  | 1.12  | 0.59  | 0.63  | 0.46 | 98.01 | 0.19 | 97.82 |
| LCM-1  | e 1.1      | 29.38 | 35.89 | 1.34  | 1.85 | 0.22 | 0.00 | 26.34 | 0.33  | 0.13  | 0.39 | 0.34  | 1.33  | 0.78  | 0.14  | 0.38 | 98.85 | 0.16 | 98.69 |
| LCM-1  | e 1.2      | 29.63 | 35.63 | 1.34  | 1.80 | 0.18 | 0.00 | 26.82 | 0.39  | 0.00  | 0.31 | 0.30  | 0.98  | 0.58  | 0.11  | 0.25 | 98.32 | 0.10 | 98.22 |
| LCM-1  | f 1.1      | 29.04 | 34.88 | 1.44  | 1.95 | 0.10 | 0.00 | 25.70 | 0.46  | 0.00  | 0.72 | 0.40  | 2.01  | 1.16  | 0.29  | 0.24 | 98.39 | 0.10 | 98.29 |
| LCM-1  | g 3.1      | 29.35 | 34.83 | 1.46  | 2.05 | 0.23 | 0.00 | 26.32 | 0.32  | 0.10  | 0.58 | 0.34  | 1.50  | 0.90  | 0.21  | 0.37 | 98.55 | 0.15 | 98.40 |
| LCM-1  | h 4.1      | 29.53 | 35.14 | 1.31  | 2.08 | 0.26 | 0.00 | 26.56 | 0.34  | 0.29  | 0.47 | 0.43  | 1.61  | 0.84  | 0.18  | 0.28 | 99.32 | 0.12 | 99.21 |
| LCM-6  | a 1.1      | 29.13 | 33.80 | 1.27  | 2.40 | 0.33 | 0.00 | 24.54 | 0.65  | 0.00  | 1.14 | 0.50  | 2.10  | 1.29  | 0.41  | 0.00 | 97.57 | 0.00 | 97.57 |
| LCM-6  | b 2.1      | 29.60 | 34.81 | 1.43  | 2.40 | 0.35 | 0.00 | 25.48 | 0.34  | 0.00  | 1.01 | 0.29  | 1.21  | 1.05  | 0.29  | 0.20 | 98.47 | 0.08 | 98.39 |
| LCM-6  | b 2.2      | 29.45 | 35.22 | 1.25  | 2.03 | 0.29 | 0.00 | 25.03 | 0.44  | 0.07  | 1.02 | 0.38  | 1.51  | 1.17  | 0.31  | 0.11 | 98.28 | 0.05 | 98.24 |
| LCM-6  | c 3.1      | 29.60 | 35.53 | 1.31  | 1.83 | 0.23 | 0.00 | 25.98 | 0.28  | 0.14  | 0.46 | 0.44  | 1.53  | 0.83  | 0.18  | 0.36 | 98.69 | 0.15 | 98.53 |
| LCM-6  | d 4.1      | 29.57 | 34.49 | 1.35  | 2.73 | 0.37 | 0.00 | 25.52 | 0.24  | 0.00  | 0.96 | 0.31  | 1.34  | 0.93  | 0.24  | 0.48 | 98.52 | 0.20 | 98.31 |
| LCM-6  | e e.1      | 29.19 | 34.22 | 1.30  | 2.48 | 0.28 | 0.02 | 25.50 | 0.27  |       | 0.99 | 0.26  | 1.20  | 0.93  | 0.98  | 0.39 | 98.01 | 0.16 | 97.84 |
| LCM-6  | e e.2      | 29.25 | 34.21 | 1.20  | 2.50 | 0.28 | 0.02 | 25.33 | 0.27  |       | 1.00 | 0.28  | 1.37  | 0.94  | 0.94  | 0.37 | 97.95 | 0.15 | 97.80 |
| LCM-6  | e e.3      | 29.18 | 34.48 | 1.27  | 2.39 | 0.35 | 0.02 | 25.39 | 0.24  |       | 0.92 | 0.37  | 1.24  | 0.86  | 0.82  | 0.47 | 97.99 | 0.20 | 97.79 |
| LCM-6  | e e.4      | 28.90 | 33.85 | 1.40  | 2.75 | 0.28 | 0.03 | 25.07 | 0.28  |       | 1.12 | 0.33  | 1.32  | 0.97  | 1.06  | 0.42 | 97.76 | 0.18 | 97.59 |
| LCM-6  | e e.5      | 28.91 | 33.90 | 1.34  | 2.60 | 0.28 | 0.02 | 25.04 | 0.26  |       | 1.14 | 0.29  | 1.41  | 1.08  | 1.09  | 0.32 | 97.66 | 0.13 | 97.53 |
| LCM-6  | e e.6      | 28.69 | 34.39 | 1.12  | 2.28 | 0.26 | 0.02 | 24.55 | 0.35  |       | 1.21 | 0.45  | 1.79  | 1.16  | 1.27  | 0.30 | 97.82 | 0.12 | 97.70 |
| LCM-6  | e e.7      | 28.94 | 34.51 | 1.19  | 2.28 | 0.29 | 0.03 | 24.72 | 0.42  |       | 1.14 | 0.44  | 1.62  | 1.13  | 1.12  | 0.34 | 98.17 | 0.14 | 98.03 |
| LCM-9  | c 1.1      | 29.22 | 33.88 | 1.29  | 2.94 | 0.36 | 0.01 | 25.52 | 0.17  | 0.00  | 0.61 | 0.33  | 1.42  | 0.85  | 0.16  | 0.73 | 97.50 | 0.31 | 97.19 |
| LCM-9  | c 1.2      | 29.44 | 33.95 | 1.07  | 3.15 | 0.62 | 0.05 | 24.32 | 0.20  | 0.01  | 1.28 | 0.31  | 1.30  | 1.20  | 0.32  | 0.42 | 97.64 | 0.17 | 97.46 |
| LCM-9  | d 2.1      | 29.34 | 35.12 | 1.15  | 2.14 | 0.49 | 0.00 | 25.10 | 0.36  | 0.00  | 0.74 | 0.34  | 1.63  | 1.05  | 0.22  | 0.07 | 97.74 | 0.03 | 97.71 |
| LCM-9  | e 3.1      | 29.31 | 34.50 | 1.62  | 2.28 | 0.23 | 0.04 | 25.17 | 0.14  | 0.54  | 0.90 | 0.34  | 1.68  | 1.30  | 0.33  | 0.20 | 98.58 | 0.08 | 98.50 |
| LCM-9  | f 4.1      | 29.48 | 34.85 | 1.22  | 2.73 | 0.53 | 0.02 | 25.30 | 0.25  | 0.00  | 0.86 | 0.25  | 1.38  | 0.93  | 0.34  | 0.38 | 98.51 | 0.16 | 98.35 |
| LCM-9  | a 1        | 29.04 | 33.15 | 1.29  | 2.59 | 0.32 | 0.03 | 25.14 | 0.28  |       | 0.84 | 0.40  | 1.39  | 0.89  | 0.99  | 0.48 | 96.82 | 0.20 | 96.61 |
| LCM-9  | a 2        | 28.92 | 33.62 | 1.23  | 2.60 | 0.35 | 0.04 | 25.06 | 0.28  |       | 0.83 | 0.30  | 1.26  | 0.86  | 0.90  | 0.55 | 96.80 | 0.23 | 96.57 |
| LCM-9  | a 4        | 29.15 | 33.72 | 1.23  | 2.49 | 0.35 | 0.05 | 25.45 | 0.26  |       | 0.82 | 0.34  | 1.26  | 0.83  | 0.89  | 0.44 | 97.26 | 0.18 | 97.07 |
| LCM-9  | a 5        | 28.92 | 34.03 | 1.20  | 2.49 | 0.38 | 0.04 | 25.22 | 0.26  |       | 0.77 | 0.32  | 1.24  | 0.80  | 0.84  | 0.44 | 96.92 | 0.18 | 96.74 |
| LCM-9  | a 6        | 29.06 | 34.17 | 1.22  | 2.42 | 0.38 | 0.03 | 25.16 | 0.14  |       | 0.73 | 0.26  | 1.17  | 0.71  | 0.77  | 0.53 | 96.75 | 0.22 | 96.52 |
| LCM-9  | a 7        | 28.87 | 33.45 | 1.21  | 2.37 | 0.34 | 0.03 | 25.56 | 0.25  |       | 0.72 | 0.34  | 1.23  | 0.74  | 0.70  | 0.54 | 96.36 | 0.23 | 96.13 |
| LCM-9  | a 8        | 28.96 | 33.53 | 1.20  | 2.35 | 0.33 | 0.04 | 25.57 | 0.22  |       | 0.71 | 0.36  | 1.24  | 0.74  | 0.77  | 0.51 | 96.52 | 0.22 | 96.31 |
| LCM-9  | a 9        | 28.90 | 33.95 | 1.17  | 2.35 | 0.38 | 0.04 | 25.47 | 0.31  |       | 0.68 | 0.34  | 1.18  | 0.73  | 0.67  | 0.44 | 96.61 | 0.19 | 96.42 |
| LCM-9  | a 10       | 29.18 | 33.96 | 1.17  | 2.33 | 0.38 | 0.03 | 25.28 | 0.24  |       | 0.64 | 0.35  | 1.26  | 0.80  | 0.81  | 0.40 | 96.84 | 0.17 | 96.66 |
| LCM-9  | a 11       | 29.32 | 34.21 | 1.15  | 2.32 | 0.37 | 0.05 | 25.76 | 0.32  |       | 0.65 | 0.33  | 1.25  | 0.70  | 0.75  | 0.50 | 97.67 | 0.21 | 97.46 |
| LCM-9  | a 12       | 29.45 | 34.61 | 1.12  | 2.36 | 0.40 | 0.05 | 25.68 | 0.21  |       | 0.68 | 0.37  | 1.21  | 0.69  | 0.80  | 0.48 | 98.11 | 0.20 | 97.91 |
| LCM-9  | a 13       | 29.58 | 34.48 | 1.19  | 2.41 | 0.37 | 0.06 | 25.60 | 0.20  |       | 0.65 | 0.35  | 1.22  | 0.75  | 0.71  | 0.44 | 98.02 | 0.19 | 97.83 |
| LCM-9  | a 14       | 29.68 | 34.58 | 1.17  | 2.45 | 0.41 | 0.04 | 25.71 | 0.25  |       | 0.63 | 0.27  | 1.30  | 0.70  | 0.72  | 0.44 | 98.36 | 0.19 | 98.17 |
| LCM-9  | a 15       | 29.56 | 33.58 | 1.24  | 2.43 | 0.41 | 0.04 | 25.73 | 0.18  |       | 0.67 | 0.26  | 1.22  | 0.77  | 0.69  | 0.51 | 97.29 | 0.21 | 97.08 |
| LCM-9  | a 16       | 29.55 | 33.89 | 1.22  | 2.44 | 0.40 | 0.04 | 25.78 | 0.21  |       | 0.64 | 0.33  | 1.18  | 0.71  | 0.84  | 0.43 | 97.66 | 0.18 | 97.48 |
| LCM-9  | a 17       | 29.63 | 34.05 | 1.22  | 2.48 | 0.39 | 0.03 | 25.83 | 0.13  |       | 0.63 | 0.28  | 1.25  | 0.71  | 0.74  | 0.53 | 97.87 | 0.22 | 97.65 |
| LCM-9  | a 18       | 29.60 | 34.94 | 1.17  | 2.24 | 0.39 | 0.03 | 25.67 | 0.27  |       | 0.48 | 0.46  | 1.46  | 0.67  | 0.75  | 0.46 | 98.58 | 0.19 | 98.38 |
| LCM-9  | a 19       | 29.45 | 34.80 | 1.21  | 2.20 | 0.35 | 0.02 | 25.68 | 0.28  |       | 0.51 | 0.44  | 1.33  | 0.67  | 0.66  | 0.41 | 98.00 | 0.17 | 97.83 |
| LCM-9  | a 20       | 29.32 | 33.77 | 1.19  | 2.31 | 0.37 | 0.02 | 25.66 | 0.14  |       | 0.50 | 0.43  | 1.37  | 0.63  | 0.66  | 0.53 | 96.90 | 0.22 | 96.68 |
| LCM-9  | b 1        | 29.65 | 34.22 | 1.17  | 2.26 | 0.41 | 0.04 | 25.71 | 0.20  |       | 0.58 | 0.43  | 1.34  | 0.62  | 0.63  | 0.57 | 97.81 | 0.24 | 97.57 |
| LCM-9  | b 2        | 29.75 | 34.74 | 1.20  | 2.32 | 0.36 | 0.03 | 25.74 | 0.29  |       | 0.49 | 0.37  | 1.31  | 0.68  | 0.69  | 0.53 | 98.50 | 0.22 | 98.27 |
| LCM-9  | b 3        | 29.56 | 33.88 | 1.26  | 2.79 | 0.37 | 0.04 | 25.31 | 0.21  |       | 0.72 | 0.31  | 1.17  | 0.79  | 0.78  | 0.54 | 97.70 | 0.23 | 97.47 |
| LCM-9  | b 4        | 29.51 | 32.77 | 1.34  | 3.13 | 0.35 | 0.05 | 25.17 | 0.26  |       | 0.74 | 0.31  | 1.33  | 0.92  | 1.15  | 0.61 | 97.63 | 0.26 | 97.37 |
| LCM-9  | b 5        | 29.49 | 34.15 | 1.26  | 2.53 | 0.45 | 0.04 | 25.35 | 0.27  |       | 0.94 | 0.25  | 1.13  | 0.79  | 0.92  | 0.45 | 98.01 | 0.19 | 97.82 |
| LCM-9  | b 6        | 29.52 | 34.09 | 1.27  | 2.65 | 0.40 | 0.05 | 24.85 | 0.25  |       | 0.91 | 0.36  | 1.27  | 0.91  | 0.93  | 0.49 | 97.94 | 0.20 | 97.74 |
| LCM-9  | b 7        | 29.49 | 33.91 | 1.26  | 2.62 | 0.40 | 0.06 | 24.85 | 0.22  |       | 0.87 | 0.35  | 1.29  | 0.84  | 0.90  | 0.57 | 97.64 | 0.24 | 97.40 |
| LCM-9  | b 8        | 29.59 | 33.76 | 1.29  | 2.53 | 0.40 | 0.04 | 25.38 | 0.21  |       | 0.78 | 0.38  | 1.34  | 0.80  | 0.82  | 0.45 | 97.77 | 0.19 | 97.58 |
| LCM-9  | b 9        | 29.38 | 34.57 | 1.20  | 2.36 | 0.38 | 0.04 | 25.49 | 0.26  |       | 0.68 |       |       |       |       |      |       |      |       |

|        |        |    |       |       |      |      |        |      |       |      |      |      |      |      |      |      |      |        |      |        |
|--------|--------|----|-------|-------|------|------|--------|------|-------|------|------|------|------|------|------|------|------|--------|------|--------|
| LCM-12 | 5.1    |    | 28.90 | 35.07 | 1.21 | 2.17 | 0.41   | 0.00 | 25.02 | 0.35 | 0.22 | 0.86 | 0.37 | 2.12 | 1.06 | 0.29 | 0.11 | 98.16  | 0.05 | 98.11  |
| LCM-12 | c.1.1  | 1  | 29.51 | 33.06 | 1.04 | 3.63 | 0.63   | 0.09 | 24.55 | 0.00 | 0.00 | 1.65 | 0.36 | 0.91 | 1.19 | 0.38 | 0.43 | 97.43  | 0.18 | 97.25  |
| LCM-12 | c.1.2  | 2  | 29.45 | 32.90 | 1.09 | 3.60 | 0.54   | 0.08 | 24.95 | 0.77 | 0.19 | 1.60 | 0.10 | 0.79 | 0.98 | 0.31 | 0.66 | 98.01  | 0.28 | 97.73  |
| LCM-12 | c.1.3  | 3  | 28.99 | 33.31 | 0.92 | 3.42 | 0.64   | 0.10 | 25.08 | 0.47 | 0.00 | 1.59 | 0.03 | 1.07 | 1.06 | 0.35 | 0.35 | 97.36  | 0.15 | 97.22  |
| LCM-12 | c.1.4  | 4  | 28.77 | 33.16 | 1.08 | 3.64 | 0.66   | 0.06 | 25.23 | 0.68 | 0.00 | 1.62 | 0.14 | 0.98 | 1.15 | 0.39 | 0.61 | 98.18  | 0.26 | 97.93  |
| LCM-12 | c.1.5  | 5  | 29.25 | 33.67 | 1.07 | 3.37 | 0.63   | 0.05 | 24.69 | 0.43 | 0.14 | 1.53 | 0.17 | 1.04 | 1.08 | 0.27 | 0.59 | 97.97  | 0.25 | 97.72  |
| LCM-12 | c.1.6  | 6  | 28.78 | 33.16 | 1.09 | 3.52 | 0.66   | 0.06 | 24.83 | 0.47 | 0.00 | 1.47 | 0.21 | 1.12 | 0.89 | 0.33 | 0.57 | 97.18  | 0.24 | 96.94  |
| LCM-12 | c.1.7  | 7  | 29.09 | 33.20 | 1.04 | 3.50 | 0.61   | 0.05 | 25.25 | 0.17 | 0.02 | 1.54 | 0.21 | 0.99 | 0.93 | 0.24 | 0.61 | 97.46  | 0.26 | 97.20  |
| LCM-12 | c.1.8  | 8  | 29.29 | 33.60 | 1.01 | 3.57 | 0.57   | 0.05 | 25.36 | 0.00 | 0.06 | 1.59 | 0.21 | 0.99 | 1.14 | 0.30 | 0.41 | 98.16  | 0.17 | 97.99  |
| LCM-12 | c.1.9  | 9  | 29.06 | 34.00 | 1.13 | 3.54 | 0.58   | 0.10 | 25.03 | 0.00 | 0.00 | 1.49 | 0.16 | 0.97 | 1.14 | 0.37 | 0.55 | 98.12  | 0.23 | 97.89  |
| LCM-12 | c.1.10 | 10 | 29.13 | 33.71 | 1.15 | 3.50 | 0.64   | 0.07 | 25.04 | 0.00 | 0.00 | 1.50 | 0.24 | 1.04 | 1.13 | 0.37 | 0.56 | 98.08  | 0.24 | 97.84  |
| LCM-12 | c.1.11 | 11 | 29.25 | 32.96 | 1.13 | 3.60 | 0.64   | 0.05 | 25.52 | 0.51 | 0.13 | 1.52 | 0.13 | 1.00 | 1.00 | 0.27 | 0.46 | 98.17  | 0.19 | 97.98  |
| LCM-12 | c.1.12 | 12 | 29.31 | 33.66 | 1.08 | 3.72 | 0.53   | 0.11 | 24.97 | 0.26 | 0.00 | 1.53 | 0.29 | 1.02 | 1.13 | 0.37 | 0.59 | 98.54  | 0.25 | 98.29  |
| LCM-12 | c.1.13 | 13 | 28.89 | 33.28 | 1.00 | 3.76 | 0.66   | 0.08 | 25.20 | 0.13 | 0.05 | 1.50 | 0.20 | 1.02 | 1.08 | 0.31 | 0.34 | 97.47  | 0.14 | 97.32  |
| LCM-12 | c.1.14 | 14 | 29.66 | 31.92 | 1.04 | 3.39 | 0.67   | 0.05 | 24.19 | 0.34 | 0.00 | 1.63 | 0.23 | 0.93 | 1.06 | 0.37 | 0.45 | 95.92  | 0.19 | 95.74  |
| LCM-12 | c.1.15 | 15 | 28.99 | 33.09 | 1.08 | 3.45 | 0.55   | 0.10 | 25.02 | 0.00 | 0.17 | 1.45 | 0.22 | 0.91 | 1.18 | 0.30 | 0.55 | 97.06  | 0.23 | 96.83  |
| LCM-12 | c.1.16 | 16 | 28.99 | 33.52 | 1.08 | 3.57 | 0.63   | 0.08 | 25.24 | 0.00 | 0.07 | 1.59 | 0.12 | 0.71 | 0.98 | 0.37 | 0.57 | 97.51  | 0.24 | 97.27  |
| LCM-12 | c.1.17 | 17 | 28.95 | 33.65 | 1.10 | 3.63 | 0.58   | 0.07 | 24.95 | 0.00 | 0.08 | 1.68 | 0.25 | 1.23 | 1.11 | 0.39 | 0.52 | 98.18  | 0.22 | 97.95  |
| LCM-12 | c.1.18 | 18 | 28.99 | 33.10 | 1.08 | 3.50 | 0.62   | 0.09 | 24.95 | 0.00 | 0.00 | 1.67 | 0.15 | 1.09 | 0.94 | 0.34 | 0.46 | 96.98  | 0.19 | 96.79  |
| LCM-12 | c.1.19 | 19 | 29.32 | 33.45 | 1.03 | 3.55 | 0.64   | 0.07 | 25.11 | 0.04 | 0.21 | 1.57 | 0.13 | 0.99 | 1.12 | 0.40 | 0.60 | 98.21  | 0.25 | 97.96  |
| LCM-12 | c.1.20 | 20 | 29.21 | 33.45 | 1.02 | 3.44 | 0.56   | 0.05 | 25.03 | 0.34 | 0.18 | 1.56 | 0.18 | 1.28 | 1.16 | 0.36 | 0.61 | 98.43  | 0.26 | 98.17  |
| LCM-12 | c.1.21 | 21 | 29.12 | 33.23 | 1.09 | 3.64 | 0.60   | 0.08 | 24.97 | 0.21 | 0.07 | 1.54 | 0.39 | 1.07 | 0.90 | 0.34 | 0.66 | 97.89  | 0.28 | 97.61  |
| LCM-12 | c.1.22 | 22 | 29.08 | 32.81 | 1.02 | 3.52 | 0.54   | 0.10 | 25.18 | 0.13 | 0.16 | 1.57 | 0.22 | 1.03 | 1.16 | 0.32 | 0.62 | 97.47  | 0.26 | 97.21  |
| LCM-12 | c.1.23 | 23 | 29.18 | 32.71 | 1.02 | 3.33 | 0.53   | 0.10 | 24.83 | 0.26 | 0.06 | 1.58 | 0.25 | 1.04 | 1.05 | 0.32 | 0.48 | 96.73  | 0.20 | 96.53  |
| LCM-12 | c.1.24 | 24 | 28.80 | 33.80 | 0.93 | 2.98 | 0.49   | 0.04 | 24.65 | 0.98 | 0.00 | 1.70 | 0.27 | 1.41 | 1.29 | 0.30 | 0.36 | 98.00  | 0.15 | 97.85  |
| LCM-12 | c.1.25 | 25 | 28.55 | 33.70 | 0.91 | 3.06 | 0.55   | 0.09 | 24.26 | 0.51 | 0.22 | 1.79 | 0.27 | 1.24 | 1.39 | 0.40 | 0.24 | 97.16  | 0.10 | 97.06  |
| LCM-12 | c.1.26 | 26 | 28.63 | 33.26 | 0.85 | 3.15 | 0.54   | 0.08 | 24.24 | 0.90 | 0.12 | 1.81 | 0.28 | 1.34 | 1.32 | 0.52 | 0.32 | 97.35  | 0.13 | 97.22  |
| LCM-12 | c.1.27 | 27 | 28.80 | 34.46 | 0.92 | 3.01 | 0.59   | 0.04 | 25.02 | 0.30 | 0.04 | 1.65 | 0.25 | 1.13 | 1.19 | 0.39 | 0.27 | 98.06  | 0.11 | 97.95  |
| LCM-12 | c.1.28 | 28 | 28.82 | 35.09 | 0.81 | 2.85 | 0.65   | 0.07 | 24.73 | 0.26 | 0.07 | 1.55 | 0.33 | 0.99 | 1.15 | 0.41 | 0.35 | 98.13  | 0.15 | 97.98  |
| LCM-12 | c.1.29 | 29 | 28.38 | 34.66 | 0.94 | 2.99 | 0.52   | 0.09 | 24.67 | 0.98 | 0.03 | 1.52 | 0.20 | 1.19 | 1.10 | 0.37 | 0.26 | 97.88  | 0.11 | 97.77  |
| LCM-12 | c.1.30 | 30 | 28.78 | 34.19 | 0.96 | 2.68 | 0.52   | 0.04 | 25.10 | 0.00 | 0.00 | 1.30 | 0.33 | 1.23 | 0.90 | 0.19 | 0.34 | 96.58  | 0.14 | 96.43  |
| LCM-12 | b.1.1  | 1  | 29.75 | 34.94 | 1.21 | 2.18 | 0.40   | 0.00 | 26.96 | 0.04 | 0.00 | 0.60 | 0.38 | 1.11 | 0.64 | 0.17 | 0.51 | 98.90  | 0.21 | 98.69  |
| LCM-12 | b.1.2  | 2  | 29.60 | 34.97 | 1.28 | 2.20 | 0.41   | 0.03 | 26.88 | 0.59 | 0.04 | 0.48 | 0.48 | 1.14 | 0.61 | 0.06 | 0.31 | 99.06  | 0.13 | 98.93  |
| LCM-12 | b.1.3  | 3  | 30.13 | 34.88 | 1.38 | 2.30 | 0.38   | 0.02 | 26.78 | 0.21 | 0.00 | 0.61 | 0.39 | 1.22 | 0.62 | 0.14 | 0.22 | 99.29  | 0.09 | 99.19  |
| LCM-12 | b.1.4  | 4  | 30.12 | 35.31 | 1.31 | 2.25 | 0.39   | 0.05 | 26.48 | 0.34 | 0.04 | 0.61 | 0.31 | 1.31 | 0.66 | 0.15 | 0.44 | 99.77  | 0.18 | 99.58  |
| LCM-12 | b.1.5  | 5  | 29.51 | 34.57 | 1.16 | 2.94 | 0.46   | 0.06 | 25.74 | 0.00 | 0.00 | 1.18 | 0.22 | 1.22 | 0.85 | 0.33 | 0.33 | 98.55  | 0.14 | 98.41  |
| LCM-12 | b.1.6  | 6  | 29.31 | 34.86 | 1.07 | 2.72 | 0.48   | 0.06 | 25.75 | 0.00 | 0.00 | 1.11 | 0.38 | 1.09 | 0.97 | 0.18 | 0.33 | 98.32  | 0.14 | 98.18  |
| LCM-12 | b.1.7  | 7  | 29.77 | 34.32 | 1.16 | 2.89 | 0.45   | 0.01 | 25.37 | 0.09 | 0.21 | 1.16 | 0.35 | 0.98 | 1.02 | 0.30 | 0.58 | 98.66  | 0.25 | 98.41  |
| LCM-12 | b.1.8  | 8  | 29.42 | 34.28 | 1.19 | 3.01 | 0.43   | 0.08 | 25.65 | 0.00 | 0.12 | 1.19 | 0.36 | 1.09 | 1.09 | 0.26 | 0.46 | 98.62  | 0.19 | 98.43  |
| LCM-12 | b.1.9  | 9  | 29.43 | 34.92 | 1.12 | 2.99 | 0.50   | 0.05 | 25.72 | 0.13 | 0.00 | 1.27 | 0.28 | 1.17 | 1.00 | 0.20 | 0.53 | 99.30  | 0.22 | 99.07  |
| LCM-12 | b.1.10 | 10 | 29.15 | 34.41 | 1.17 | 2.83 | 0.47   | 0.04 | 26.04 | 0.21 | 0.00 | 1.23 | 0.27 | 0.86 | 1.04 | 0.15 | 0.36 | 98.23  | 0.15 | 98.08  |
| LCM-12 | b.1.11 | 11 | 29.12 | 34.47 | 1.02 | 2.89 | 0.49   | 0.04 | 25.56 | 0.00 | 0.00 | 1.37 | 0.34 | 0.99 | 0.98 | 0.25 | 0.28 | 97.79  | 0.12 | 97.67  |
| LCM-12 | b.1.12 | 12 | 29.10 | 34.43 | 1.11 | 2.67 | 0.51   | 0.04 | 25.01 | 0.17 | 0.00 | 1.19 | 0.38 | 1.16 | 1.03 | 0.23 | 0.34 | 97.36  | 0.14 | 97.22  |
| LCM-12 | b.1.13 | 13 | 29.41 | 35.06 | 1.11 | 2.52 | 0.40   | 0.04 | 25.96 | 0.34 | 0.05 | 0.99 | 0.30 | 1.30 | 0.81 | 0.22 | 0.43 | 98.91  | 0.18 | 98.73  |
| LCM-12 | b.1.14 | 14 | 29.52 | 35.60 | 1.24 | 2.19 | 0.34   | 0.02 | 27.09 | 0.64 | 0.00 | 0.56 | 0.31 | 1.28 | 0.56 | 0.07 | 0.31 | 99.72  | 0.13 | 99.59  |
| LCM-12 | b.1.15 | 15 | 29.64 | 35.14 | 1.12 | 2.15 | 0.33   | 0.00 | 26.71 | 0.51 | 0.12 | 0.53 | 0.48 | 1.22 | 0.51 | 0.11 | 0.28 | 98.85  | 0.12 | 98.73  |
| LCM-12 | b.1.16 | 16 | 29.69 | 35.17 | 1.13 | 2.23 | 0.36   | 0.00 | 26.97 | 0.17 | 0.20 | 0.61 | 0.27 | 1.53 | 0.64 | 0.21 | 0.40 | 99.59  | 0.17 | 99.42  |
| LCM-12 | b.1.17 | 17 | 29.67 | 35.78 | 1.10 | 2.17 | 0.33   | 0.02 | 26.76 | 0.51 | 0.00 | 0.61 | 0.45 | 1.59 | 0.58 | 0.11 | 0.35 | 100.01 | 0.15 | 99.87  |
| LCM-12 | b.1.18 | 18 | 29.36 | 35.30 | 1.10 | 2.03 | 0.35   | 0.05 | 26.15 | 0.21 | 0.00 | 0.58 | 0.40 | 1.31 | 0.69 | 0.08 | 0.44 | 98.04  | 0.18 | 97.86  |
| LCM-12 | b.1.19 | 19 | 29.85 | 35.30 | 1.06 | 2.06 | 0.26   | 0.04 | 26.73 | 0.00 | 0.00 | 0.58 | 0.64 | 1.37 | 0.56 | 0.12 | 0.21 | 98.77  | 0.09 | 98.68  |
| LCM-12 | b.1.20 | 20 | 29.22 | 34.97 | 1.20 | 2.38 | 0.41   | 0.05 | 25.70 | 0.47 | 0.26 | 1.04 | 0.41 | 1.25 | 0.59 | 0.10 | 0.71 | 98.78  | 0.30 | 98.48  |
| LCM-12 | a.1.1  | 1  | 29.68 | 35.96 | 1.15 | 1.67 | 0.24   | 0.02 | 26.76 | 0.89 | 0.09 | 0.60 | 0.36 | 1.13 | 0.64 | 0.10 | 0.19 | 99.48  | 0.08 | 99.40  |
| LCM-12 | a.1.2  | 2  | 29.29 | 36.29 | 1.11 | 1.59 | 0.26   | 0.06 | 26.67 | 1.57 | 0.01 | 0.49 | 0.43 | 1.09 | 0.51 | 0.13 | 0.47 | 99.95  | 0.20 | 99.76  |
| LCM-12 | a.1.3  | 3  | 29.30 | 35.53 | 1.19 | 1.72 | 0.23   | 0.02 | 26.53 | 0.89 | 0.11 | 0.65 | 0.33 | 1.25 | 0.60 | 0.06 | 0.20 | 98.59  | 0.08 | 98.51  |
| LCM-12 | a.1.4  | 4  | 29.31 | 35.87 | 1.07 | 1.46 | 0.22   | 0.00 | 26.77 | 0.38 | 0.33 | 0.48 | 0.28 | 1.23 | 0.59 | 0.15 | 0.24 | 98.39  | 0.10 | 98.28  |
| LCM-12 | a.1.5  | 5  | 29.53 | 35.58 | 1.05 | 1.67 | 0.24   | 0.02 | 27.04 | 0.59 | 0.00 | 0.65 | 0.20 | 1.03 | 0.52 | 0.13 | 0.12 | 98.37  | 0.05 | 98.32  |
| LCM-12 | a.1.6  | 6  | 29.08 | 35.39 | 1.12 | 1.65 | 0.21   | 0.03 | 26.80 | 0.76 | 0.00 | 0.62 | 0.40 | 1.08 | 0.81 | 0.01 | 0.40 | 98.35  | 0.17 | 98.18  |
| LCM-12 | a.1.7  | 7  | 29.35 | 35.74 | 1.18 | 1.67 | 0.21   | 0.02 | 26.69 | 0.81 | 0.00 | 0.59 | 0.12 | 0.87 | 0.63 | 0.25 | 0.14 | 98.26  | 0.06 | 98.20  |
| LCM-12 | a.1.8  | 8  | 29.46 | 36.44 | 1.10 | 1.74 | 0.22   | 0.01 | 27.40 | 0.97 | 0.05 | 0.68 | 0.08 | 1.11 | 0.54 | 0.08 | 0.42 | 100.30 | 0.18 | 100.13 |
| LCM-12 | a.1.9  | 9  | 29.39 | 35.34 | 1.23 | 1.76 | 0.24   | 0.04 | 27.54 | 1.02 | 0.12 | 0.50 | 0.24 | 0.81 | 0.43 | 0.07 | 0.28 | 99.00  | 0.12 | 98.88  |
| LCM-12 | a.1.10 | 10 | 29.82 | 35.04 | 1.26 | 1.89 | 0.34   | 0.05 | 27.42 | 0.00 | 0.00 | 0.56 | 0.23 | 1.00 | 0.51 | 0.13 | 0.38 | 98.62  | 0.16 | 98.46  |
| LCM-12 | a.1.11 | 11 | 29.19 | 35.59 | 1.30 | 1.69 | 0.27   | 0.01 | 27.00 | 0.55 | 0.00 | 0.67 | 0.35 | 0.99 | 0.51 | 0.04 | 0.34 | 98.49  | 0.14 | 98.35  |
| LCM-12 | a.1.12 | 12 | 29.23 | 35.70 | 1.23 | 1.90 | 0.27</ |      |       |      |      |      |      |      |      |      |      |        |      |        |

|        |   |     |       |       |      |      |      |      |       |      |      |      |      |      |      |      |       |      |       |
|--------|---|-----|-------|-------|------|------|------|------|-------|------|------|------|------|------|------|------|-------|------|-------|
| LCM-12 | a | 6   | 29.41 | 31.67 | 1.35 | 3.01 | 0.46 | 0.06 | 24.64 | 0.31 | 1.27 | 0.28 | 1.28 | 0.72 | 0.70 | 0.59 | 95.76 | 0.25 | 95.51 |
| LCM-12 | a | 7   | 29.35 | 32.45 | 1.32 | 3.14 | 0.47 | 0.04 | 24.57 | 0.28 | 1.21 | 0.29 | 1.21 | 0.66 | 0.71 | 0.72 | 96.43 | 0.30 | 96.12 |
| LCM-12 | a | 8   | 29.15 | 32.69 | 1.31 | 3.17 | 0.43 | 0.05 | 24.76 | 0.29 | 1.30 | 0.31 | 1.26 | 0.75 | 0.76 | 0.65 | 96.87 | 0.27 | 96.59 |
| LCM-12 | a | 9   | 29.21 | 33.01 | 1.35 | 3.16 | 0.46 | 0.05 | 24.56 | 0.28 | 1.35 | 0.33 | 1.21 | 0.73 | 0.80 | 0.61 | 97.12 | 0.26 | 96.86 |
| LCM-12 | a | 10  | 29.22 | 32.72 | 1.37 | 3.19 | 0.42 | 0.05 | 24.59 | 0.21 | 1.32 | 0.28 | 1.19 | 0.77 | 0.82 | 0.64 | 96.79 | 0.27 | 96.52 |
| LCM-12 | a | 11  | 29.20 | 32.16 | 1.30 | 3.14 | 0.47 | 0.06 | 24.75 | 0.28 | 1.29 | 0.25 | 1.23 | 0.69 | 0.79 | 0.61 | 96.23 | 0.26 | 95.97 |
| LCM-12 | a | 12  | 28.95 | 33.11 | 1.16 | 2.54 | 0.43 | 0.04 | 24.13 | 0.64 | 1.41 | 0.29 | 1.27 | 0.78 | 0.88 | 0.43 | 96.06 | 0.18 | 95.88 |
| LCM-12 | a | 13  | 28.87 | 33.52 | 1.12 | 2.62 | 0.43 | 0.05 | 24.19 | 0.71 | 1.48 | 0.24 | 1.32 | 0.78 | 0.81 | 0.37 | 96.51 | 0.15 | 96.35 |
| LCM-12 | a | 14  | 29.36 | 32.29 | 1.32 | 3.23 | 0.46 | 0.05 | 24.57 | 0.35 | 1.33 | 0.25 | 1.27 | 0.70 | 0.77 | 0.58 | 96.52 | 0.24 | 96.27 |
| LCM-12 | a | 15  | 29.30 | 32.58 | 1.40 | 3.20 | 0.48 | 0.05 | 24.84 | 0.20 | 1.30 | 0.35 | 1.24 | 0.68 | 0.75 | 0.59 | 96.94 | 0.25 | 96.70 |
| LCM-12 | a | 16  | 29.33 | 33.21 | 1.27 | 3.10 | 0.43 | 0.06 | 24.47 | 0.36 | 1.29 | 0.24 | 1.27 | 0.68 | 0.67 | 0.56 | 96.92 | 0.24 | 96.69 |
| LCM-12 | a | 17  | 29.11 | 33.16 | 1.34 | 2.89 | 0.48 | 0.06 | 24.20 | 0.27 | 1.25 | 0.32 | 1.25 | 0.65 | 0.68 | 0.49 | 96.14 | 0.21 | 95.94 |
| LCM-12 | a | 18  | 29.30 | 32.27 | 1.35 | 3.12 | 0.44 | 0.06 | 24.25 | 0.27 | 1.26 | 0.32 | 1.22 | 0.73 | 0.68 | 0.54 | 95.80 | 0.23 | 95.57 |
| LCM-12 | a | 19  | 29.27 | 32.65 | 1.35 | 3.10 | 0.44 | 0.06 | 24.55 | 0.24 | 1.27 | 0.36 | 1.28 | 0.66 | 0.66 | 0.61 | 96.50 | 0.26 | 96.24 |
| LCM-12 | a | 20  | 29.34 | 33.28 | 1.36 | 2.72 | 0.41 | 0.05 | 24.53 | 0.32 | 1.10 | 0.34 | 1.27 | 0.67 | 0.71 | 0.63 | 96.72 | 0.26 | 96.46 |
|        |   |     |       |       |      |      |      |      |       |      |      |      |      |      |      |      |       |      |       |
| LCM-13 | a | 1   | 29.52 | 33.74 | 1.34 | 2.27 | 0.35 | 0.02 | 25.20 | 0.24 | 0.91 | 0.40 | 1.35 | 0.77 | 0.79 | 0.41 | 97.31 | 0.17 | 97.14 |
| LCM-13 | a | 2   | 29.37 | 34.23 | 1.28 | 2.25 | 0.35 | 0.02 | 25.18 | 0.31 | 0.92 | 0.38 | 1.37 | 0.83 | 0.90 | 0.38 | 97.75 | 0.16 | 97.59 |
| LCM-13 | a | 3   | 29.38 | 34.32 | 1.24 | 2.18 | 0.34 | 0.02 | 24.76 | 0.26 | 0.93 | 0.41 | 1.35 | 0.89 | 0.89 | 0.32 | 97.29 | 0.13 | 97.16 |
| LCM-13 | a | 4   | 29.50 | 34.46 | 1.31 | 2.32 | 0.35 | 0.03 | 24.97 | 0.25 | 0.94 | 0.31 | 1.41 | 0.82 | 0.91 | 0.46 | 98.03 | 0.19 | 97.84 |
| LCM-13 | a | 5   | 29.29 | 33.34 | 1.25 | 2.33 | 0.38 | 0.03 | 24.86 | 0.30 | 1.01 | 0.35 | 1.32 | 0.95 | 1.03 | 0.32 | 96.75 | 0.14 | 96.61 |
| LCM-13 | a | 6   | 28.97 | 33.67 | 1.15 | 2.07 | 0.34 | 0.01 | 24.53 | 0.41 | 1.14 | 0.42 | 1.58 | 0.99 | 1.03 | 0.25 | 96.57 | 0.11 | 96.46 |
| LCM-13 | a | 7   | 29.11 | 33.74 | 1.24 | 2.34 | 0.38 | 0.02 | 24.53 | 0.36 | 1.07 | 0.35 | 1.47 | 0.92 | 1.04 | 0.34 | 96.89 | 0.14 | 96.75 |
| LCM-13 | a | 8   | 29.30 | 33.60 | 1.34 | 2.52 | 0.39 | 0.04 | 24.93 | 0.24 | 1.01 | 0.37 | 1.39 | 0.86 | 0.99 | 0.39 | 97.35 | 0.17 | 97.18 |
| LCM-13 | a | 9   | 29.33 | 33.10 | 1.25 | 2.37 | 0.30 | 0.02 | 25.15 | 0.23 | 0.98 | 0.33 | 1.42 | 0.90 | 0.95 | 0.39 | 96.71 | 0.17 | 96.54 |
| LCM-13 | a | 10  | 29.26 | 33.65 | 1.37 | 2.42 | 0.32 | 0.03 | 25.04 | 0.18 | 0.96 | 0.40 | 1.44 | 0.81 | 0.97 | 0.47 | 97.30 | 0.20 | 97.10 |
| LCM-13 | b | 1   | 29.39 | 33.43 | 1.27 | 2.48 | 0.34 | 0.03 | 24.98 | 0.17 | 0.70 | 0.45 | 1.36 | 0.73 | 0.83 | 0.52 | 96.67 | 0.22 | 96.45 |
| LCM-13 | b | 2   | 29.74 | 34.19 | 1.26 | 2.37 | 0.35 | 0.03 | 25.08 | 0.18 | 0.61 | 0.37 | 1.38 | 0.58 | 0.69 | 0.46 | 97.30 | 0.19 | 97.10 |
| LCM-13 | b | 3   | 29.59 | 32.87 | 1.32 | 2.47 | 0.34 | 0.03 | 24.84 | 0.21 | 0.73 | 0.43 | 1.61 | 0.75 | 0.84 | 0.52 | 96.55 | 0.22 | 96.34 |
| LCM-13 | b | 4   | 29.37 | 33.34 | 1.34 | 2.54 | 0.29 | 0.06 | 24.81 | 0.24 | 0.93 | 0.29 | 1.37 | 0.96 | 1.02 | 0.44 | 96.99 | 0.18 | 96.80 |
| LCM-13 | b | 5   | 29.27 | 33.37 | 1.35 | 2.59 | 0.30 | 0.04 | 24.46 | 0.16 | 1.05 | 0.35 | 1.42 | 1.04 | 1.05 | 0.51 | 96.96 | 0.21 | 96.74 |
| LCM-13 | b | 6   | 29.18 | 33.08 | 1.40 | 2.62 | 0.30 | 0.03 | 24.27 | 0.17 | 1.07 | 0.32 | 1.49 | 1.06 | 1.19 | 0.48 | 96.65 | 0.20 | 96.45 |
| LCM-13 | b | 7   | 29.22 | 32.11 | 1.45 | 2.70 | 0.29 | 0.05 | 24.29 | 0.16 | 1.19 | 0.30 | 1.44 | 1.24 | 1.26 | 0.47 | 96.15 | 0.20 | 95.95 |
| LCM-13 | b | 8   | 29.09 | 32.30 | 1.52 | 2.95 | 0.30 | 0.05 | 24.36 | 0.17 | 1.27 | 0.38 | 1.43 | 1.35 | 1.43 | 0.44 | 97.04 | 0.19 | 96.86 |
| LCM-13 | b | 9   | 28.75 | 33.30 | 1.22 | 2.43 | 0.30 | 0.06 | 23.96 | 0.21 | 1.28 | 0.37 | 1.53 | 1.35 | 1.37 | 0.27 | 96.40 | 0.11 | 96.29 |
| LCM-13 | b | 10  | 28.99 | 33.06 | 1.21 | 2.34 | 0.27 | 0.05 | 24.12 | 0.20 | 1.20 | 0.29 | 1.47 | 1.26 | 1.39 | 0.30 | 96.16 | 0.13 | 96.03 |
| LCM-13 | b | 11  | 29.45 | 32.60 | 1.40 | 2.60 | 0.28 | 0.05 | 24.50 | 0.22 | 1.13 | 0.32 | 1.37 | 1.14 | 1.21 | 0.44 | 96.71 | 0.18 | 96.53 |
| LCM-13 | b | 12  | 29.39 | 33.01 | 1.41 | 2.61 | 0.28 | 0.07 | 24.68 | 0.16 | 1.04 | 0.33 | 1.42 | 0.99 | 1.10 | 0.46 | 96.95 | 0.19 | 96.76 |
| LCM-13 | b | 13  | 29.66 | 33.14 | 1.34 | 2.47 | 0.35 | 0.03 | 24.87 | 0.11 | 0.87 | 0.34 | 1.61 | 0.88 | 1.04 | 0.49 | 97.18 | 0.21 | 96.97 |
| LCM-13 | b | 14  | 29.82 | 32.59 | 1.26 | 2.40 | 0.34 | 0.02 | 25.17 | 0.21 | 0.68 | 0.39 | 1.48 | 0.66 | 0.78 | 0.50 | 96.29 | 0.21 | 96.08 |
| LCM-13 | b | 15  | 29.79 | 33.80 | 1.24 | 2.36 | 0.37 | 0.02 | 25.10 | 0.24 | 0.70 | 0.40 | 1.38 | 0.65 | 0.63 | 0.52 | 97.22 | 0.22 | 97.00 |
| LCM-13 | c | 1.1 | 28.66 | 34.96 | 1.24 | 2.30 | 0.34 | 0.00 | 24.90 | 0.29 | 0.00 | 0.98 | 0.47 | 1.96 | 1.54 | 0.42 | 96.23 | 0.07 | 98.16 |
| LCM-13 | d | 2.1 | 29.14 | 35.17 | 1.32 | 2.26 | 0.40 | 0.02 | 25.20 | 0.30 | 0.18 | 0.87 | 0.41 | 1.78 | 1.34 | 0.40 | 99.04 | 0.10 | 98.94 |
| LCM-13 | e | 3.1 | 29.16 | 35.93 | 1.18 | 1.96 | 0.24 | 0.00 | 25.34 | 0.34 | 0.00 | 0.82 | 0.41 | 1.79 | 1.13 | 0.30 | 98.88 | 0.12 | 98.76 |
| LCM-13 | f | 4.1 | 28.96 | 34.73 | 1.24 | 2.40 | 0.24 | 0.01 | 24.67 | 0.26 | 0.00 | 1.05 | 0.46 | 1.99 | 1.61 | 0.41 | 98.12 | 0.04 | 98.08 |
| LCM-13 | f | 4.2 | 29.22 | 35.30 | 1.28 | 2.18 | 0.31 | 0.01 | 24.93 | 0.23 | 0.06 | 0.85 | 0.47 | 1.88 | 1.33 | 0.32 | 98.60 | 0.09 | 98.51 |
|        |   |     |       |       |      |      |      |      |       |      |      |      |      |      |      |      |       |      |       |
| LCM-15 | a | 1   | 29.09 | 33.12 | 1.40 | 2.59 | 0.21 | 0.03 | 23.88 | 0.14 | 1.06 | 0.31 | 1.47 | 1.33 | 1.48 | 0.38 | 96.48 | 0.16 | 96.31 |
| LCM-15 | a | 2   | 29.16 | 33.90 | 1.24 | 1.91 | 0.20 | 0.01 | 24.21 | 0.26 | 0.92 | 0.45 | 1.73 | 1.21 | 1.43 | 0.24 | 96.85 | 0.10 | 96.75 |
| LCM-15 | a | 3   | 29.21 | 33.45 | 1.19 | 1.77 | 0.20 | 0.02 | 24.47 | 0.27 | 0.90 | 0.40 | 1.69 | 1.27 | 1.32 | 0.19 | 96.34 | 0.08 | 96.26 |
| LCM-15 | a | 4   | 29.19 | 34.12 | 1.21 | 1.85 | 0.21 | 0.03 | 24.23 | 0.28 | 0.92 | 0.45 | 1.86 | 1.31 | 1.37 | 0.21 | 97.26 | 0.09 | 97.17 |
| LCM-15 | a | 5   | 29.36 | 34.44 | 1.20 | 1.86 | 0.27 | 0.02 | 24.05 | 0.24 | 0.92 | 0.50 | 1.73 | 1.25 | 1.33 | 0.28 | 97.42 | 0.12 | 97.30 |
| LCM-15 | a | 6   | 29.32 | 33.32 | 1.27 | 2.25 | 0.21 | 0.02 | 24.73 | 0.23 | 0.94 | 0.22 | 1.49 | 1.08 | 1.22 | 0.36 | 96.65 | 0.15 | 96.50 |
| LCM-15 | a | 7   | 29.39 | 33.77 | 1.27 | 2.31 | 0.29 | 0.02 | 25.06 | 0.00 | 0.94 | 0.33 | 1.37 | 1.05 | 1.14 | 0.31 | 97.25 | 0.13 | 97.11 |
| LCM-15 | a | 8   | 29.34 | 34.11 | 1.24 | 2.19 | 0.19 | 0.03 | 24.58 | 0.17 | 1.00 | 0.33 | 1.40 | 1.31 | 1.34 | 0.27 | 97.47 | 0.11 | 97.36 |
| LCM-15 | a | 9   | 29.22 | 34.14 | 1.19 | 2.07 | 0.25 | 0.03 | 24.23 | 0.17 | 1.08 | 0.34 | 1.52 | 1.38 | 1.41 | 0.25 | 97.27 | 0.10 | 97.16 |
| LCM-15 | b | 1   | 29.18 | 34.03 | 1.33 | 2.43 | 0.25 | 0.03 | 24.57 | 0.09 | 1.08 | 0.28 | 1.50 | 1.38 | 1.53 | 0.   |       |      |       |

|        |   |    |       |       |      |      |      |      |       |      |      |      |      |      |      |      |        |      |        |
|--------|---|----|-------|-------|------|------|------|------|-------|------|------|------|------|------|------|------|--------|------|--------|
| LCM-20 | a | 8  | 30.62 | 36.28 | 1.55 | 1.36 | 0.09 | 0.01 | 27.45 | 0.08 | 0.15 | 0.09 | 0.27 | 0.21 | 0.27 | 0.55 | 98.99  | 0.23 | 98.75  |
| LCM-20 | a | 9  | 30.68 | 35.92 | 1.52 | 1.53 | 0.13 | 0.00 | 29.31 | 0.12 | 0.16 | 0.06 | 0.29 | 0.22 | 0.21 | 0.50 | 100.64 | 0.21 | 100.43 |
| LCM-20 | a | 10 | 30.40 | 35.58 | 1.60 | 1.55 | 0.10 | 0.00 | 27.37 | 0.08 | 0.16 | 0.08 | 0.34 | 0.26 | 0.21 | 0.54 | 98.26  | 0.23 | 98.04  |
| LCM-20 | a | 11 | 30.32 | 35.01 | 1.59 | 1.61 | 0.11 | 0.00 | 27.24 | 0.08 | 0.11 | 0.10 | 0.36 | 0.29 | 0.32 | 0.48 | 97.63  | 0.20 | 97.43  |
| LCM-20 | a | 12 | 30.34 | 35.62 | 1.64 | 1.48 | 0.09 | 0.00 | 27.42 | 0.07 | 0.11 | 0.07 | 0.34 | 0.31 | 0.25 | 0.57 | 98.29  | 0.24 | 98.05  |
| LCM-20 | a | 13 | 30.29 | 35.76 | 1.55 | 1.55 | 0.09 | 0.00 | 27.26 | 0.16 | 0.15 | 0.12 | 0.36 | 0.35 | 0.29 | 0.49 | 98.42  | 0.21 | 98.22  |
| LCM-20 | a | 14 | 30.43 | 35.92 | 1.64 | 1.47 | 0.10 | 0.00 | 27.62 | 0.08 | 0.12 | 0.09 | 0.29 | 0.26 | 0.33 | 0.61 | 98.94  | 0.26 | 98.68  |
| LCM-20 | a | 15 | 30.25 | 35.37 | 1.57 | 1.55 | 0.06 | 0.00 | 27.69 | 0.09 | 0.14 | 0.05 | 0.40 | 0.29 | 0.37 | 0.54 | 98.36  | 0.23 | 98.13  |
| LCM-20 | a | 16 | 30.24 | 35.92 | 1.36 | 1.37 | 0.08 | 0.00 | 27.39 | 0.17 | 0.13 | 0.09 | 0.39 | 0.31 | 0.29 | 0.46 | 98.21  | 0.20 | 98.01  |
| LCM-20 | a | 17 | 30.52 | 35.88 | 1.56 | 1.57 | 0.12 | 0.01 | 27.33 | 0.24 | 0.13 | 0.07 | 0.30 | 0.22 | 0.26 | 0.56 | 98.78  | 0.24 | 98.55  |
| LCM-20 | a | 18 | 30.54 | 35.23 | 1.45 | 1.39 | 0.13 | 0.01 | 27.55 | 0.12 | 0.16 | 0.09 | 0.38 | 0.27 | 0.30 | 0.49 | 98.10  | 0.20 | 97.89  |
| LCM-20 | a | 19 | 30.32 | 35.48 | 1.52 | 1.41 | 0.09 | 0.01 | 27.37 | 0.11 | 0.15 | 0.13 | 0.32 | 0.36 | 0.23 | 0.44 | 97.94  | 0.18 | 97.75  |
| LCM-20 | a | 20 | 30.46 | 36.21 | 1.44 | 1.35 | 0.06 | 0.02 | 27.22 | 0.23 | 0.16 | 0.07 | 0.32 | 0.33 | 0.37 | 0.45 | 98.70  | 0.19 | 98.51  |
| LCM-20 | b | 1  | 29.92 | 34.56 | 1.33 | 1.44 | 0.24 | 0.00 | 26.95 | 0.17 | 0.19 | 0.27 | 0.72 | 0.29 | 0.29 | 0.44 | 96.81  | 0.19 | 96.63  |
| LCM-20 | b | 2  | 29.91 | 35.44 | 1.29 | 1.40 | 0.30 | 0.02 | 26.94 | 0.17 | 0.15 | 0.35 | 0.73 | 0.28 | 0.27 | 0.47 | 97.72  | 0.20 | 97.52  |
| LCM-20 | b | 3  | 29.91 | 35.59 | 1.29 | 1.39 | 0.22 | 0.02 | 26.83 | 0.17 | 0.16 | 0.34 | 0.73 | 0.28 | 0.31 | 0.57 | 97.80  | 0.24 | 97.56  |
| LCM-20 | b | 4  | 29.97 | 35.68 | 1.30 | 1.38 | 0.28 | 0.02 | 26.66 | 0.15 | 0.13 | 0.27 | 0.69 | 0.32 | 0.30 | 0.49 | 97.64  | 0.21 | 97.43  |
| LCM-20 | b | 5  | 29.66 | 35.12 | 1.33 | 1.42 | 0.25 | 0.03 | 26.76 | 0.15 | 0.18 | 0.31 | 0.68 | 0.33 | 0.34 | 0.49 | 97.03  | 0.21 | 96.83  |
| LCM-20 | b | 6  | 29.50 | 34.71 | 1.27 | 1.41 | 0.29 | 0.03 | 26.55 | 0.18 | 0.18 | 0.24 | 0.77 | 0.30 | 0.34 | 0.54 | 96.31  | 0.23 | 96.08  |
| LCM-20 | b | 7  | 29.55 | 35.52 | 1.30 | 1.39 | 0.25 | 0.01 | 26.66 | 0.17 | 0.19 | 0.29 | 0.70 | 0.26 | 0.29 | 0.48 | 97.07  | 0.20 | 96.86  |
| LCM-20 | b | 8  | 30.21 | 36.21 | 1.34 | 1.38 | 0.26 | 0.01 | 26.36 | 0.27 | 0.17 | 0.23 | 0.62 | 0.21 | 0.24 | 0.56 | 98.06  | 0.23 | 97.83  |
| LCM-20 | b | 9  | 29.68 | 35.79 | 1.29 | 1.40 | 0.25 | 0.00 | 26.71 | 0.22 | 0.19 | 0.34 | 0.68 | 0.33 | 0.33 | 0.54 | 97.75  | 0.23 | 97.53  |
| LCM-20 | b | 10 | 29.97 | 35.67 | 1.30 | 1.48 | 0.26 | 0.02 | 26.73 | 0.22 | 0.19 | 0.24 | 0.78 | 0.25 | 0.32 | 0.51 | 97.92  | 0.21 | 97.71  |
| LCM-20 | b | 11 | 30.02 | 35.99 | 1.37 | 1.44 | 0.26 | 0.01 | 26.60 | 0.23 | 0.21 | 0.27 | 0.66 | 0.26 | 0.31 | 0.53 | 98.16  | 0.22 | 97.93  |
| LCM-20 | b | 12 | 29.83 | 35.68 | 1.34 | 1.44 | 0.25 | 0.01 | 26.59 | 0.17 | 0.20 | 0.28 | 0.79 | 0.24 | 0.26 | 0.50 | 97.59  | 0.21 | 97.38  |
| LCM-20 | b | 13 | 29.81 | 34.82 | 1.38 | 1.38 | 0.23 | 0.02 | 26.83 | 0.22 | 0.15 | 0.29 | 0.68 | 0.25 | 0.34 | 0.51 | 96.91  | 0.22 | 96.70  |
| LCM-20 | b | 14 | 30.10 | 34.81 | 1.35 | 1.41 | 0.25 | 0.02 | 27.06 | 0.20 | 0.18 | 0.25 | 0.74 | 0.27 | 0.28 | 0.45 | 97.35  | 0.19 | 97.16  |
| LCM-20 | b | 15 | 30.06 | 35.28 | 1.35 | 1.40 | 0.25 | 0.01 | 27.08 | 0.12 | 0.16 | 0.30 | 0.61 | 0.22 | 0.33 | 0.51 | 97.66  | 0.21 | 97.45  |
| LCM-20 | b | 16 | 30.10 | 35.71 | 1.39 | 1.39 | 0.27 | 0.01 | 26.93 | 0.16 | 0.17 | 0.27 | 0.69 | 0.30 | 0.28 | 0.52 | 98.17  | 0.22 | 97.95  |
| LCM-20 | b | 17 | 30.05 | 34.10 | 1.39 | 1.45 | 0.25 | 0.01 | 26.86 | 0.21 | 0.14 | 0.31 | 0.65 | 0.27 | 0.31 | 0.51 | 96.50  | 0.21 | 96.29  |
| LCM-20 | b | 18 | 29.93 | 35.31 | 1.47 | 1.47 | 0.26 | 0.01 | 26.98 | 0.20 | 0.17 | 0.22 | 0.55 | 0.20 | 0.26 | 0.62 | 97.66  | 0.26 | 97.39  |
| LCM-20 | b | 19 | 30.09 | 35.29 | 1.45 | 1.46 | 0.28 | 0.01 | 26.79 | 0.20 | 0.17 | 0.28 | 0.62 | 0.24 | 0.31 | 0.50 | 97.69  | 0.21 | 97.48  |
| LCM-20 | b | 20 | 29.76 | 34.55 | 1.44 | 1.41 | 0.26 | 0.02 | 26.71 | 0.27 | 0.18 | 0.23 | 0.56 | 0.26 | 0.29 | 0.86 | 96.80  | 0.36 | 96.43  |
|        |   |    |       |       |      |      |      |      |       |      |      |      |      |      |      |      |        |      |        |
| LCM-21 | a | 1  | 29.44 | 34.56 | 1.35 | 2.25 | 0.27 | 0.03 | 25.71 | 0.44 | 0.55 | 0.36 | 1.50 | 0.85 | 0.89 | 0.51 | 98.70  | 0.21 | 98.48  |
| LCM-21 | a | 2  | 29.29 | 34.31 | 1.42 | 2.18 | 0.29 | 0.04 | 25.58 | 0.36 | 0.58 | 0.40 | 1.48 | 0.87 | 0.88 | 0.47 | 98.16  | 0.20 | 97.96  |
| LCM-21 | a | 3  | 29.20 | 34.28 | 1.29 | 1.84 | 0.27 | 0.02 | 25.81 | 0.50 | 0.52 | 0.51 | 1.79 | 0.84 | 0.79 | 0.32 | 97.97  | 0.14 | 97.83  |
| LCM-21 | a | 5  | 29.34 | 34.68 | 1.23 | 2.02 | 0.30 | 0.03 | 25.45 | 0.44 | 0.59 | 0.43 | 1.71 | 0.76 | 0.96 | 0.30 | 98.24  | 0.13 | 98.11  |
| LCM-21 | a | 6  | 29.36 | 34.75 | 1.29 | 2.16 | 0.28 | 0.05 | 25.49 | 0.32 | 0.60 | 0.44 | 1.57 | 0.78 | 0.83 | 0.33 | 98.24  | 0.14 | 98.10  |
| LCM-21 | a | 7  | 29.42 | 34.45 | 1.36 | 2.14 | 0.28 | 0.04 | 25.61 | 0.29 | 0.64 | 0.40 | 1.43 | 0.88 | 0.90 | 0.35 | 98.17  | 0.15 | 98.02  |
| LCM-21 | a | 8  | 29.50 | 34.39 | 1.35 | 2.17 | 0.27 | 0.03 | 25.81 | 0.30 | 0.60 | 0.35 | 1.50 | 0.77 | 0.85 | 0.38 | 98.27  | 0.16 | 98.11  |
| LCM-21 | a | 9  | 29.43 | 34.32 | 1.40 | 2.27 | 0.27 | 0.03 | 25.53 | 0.42 | 0.59 | 0.35 | 1.36 | 0.73 | 0.81 | 0.42 | 97.92  | 0.18 | 97.74  |
| LCM-21 | a | 10 | 29.43 | 34.25 | 1.45 | 2.27 | 0.27 | 0.02 | 25.39 | 0.36 | 0.55 | 0.34 | 1.42 | 0.70 | 0.77 | 0.50 | 97.73  | 0.21 | 97.52  |
|        |   |    |       |       |      |      |      |      |       |      |      |      |      |      |      |      |        |      |        |
| LCM-22 | a | 1  | 28.94 | 33.37 | 1.39 | 2.75 | 0.31 | 0.05 | 24.57 | 0.13 | 1.21 | 0.27 | 1.38 | 1.11 | 1.22 | 0.49 | 97.17  | 0.21 | 96.96  |
| LCM-22 | a | 2  | 29.67 | 34.21 | 1.30 | 2.31 | 0.28 | 0.03 | 25.47 | 0.12 | 0.60 | 0.45 | 1.51 | 0.76 | 0.78 | 0.50 | 97.98  | 0.21 | 97.77  |
| LCM-22 | a | 3  | 29.49 | 34.67 | 1.31 | 2.34 | 0.31 | 0.02 | 25.56 | 0.15 | 0.54 | 0.42 | 1.59 | 0.68 | 0.77 | 0.43 | 98.27  | 0.18 | 98.09  |
| LCM-22 | a | 4  | 29.44 | 34.81 | 1.28 | 2.24 | 0.28 | 0.02 | 25.62 | 0.16 | 0.62 | 0.43 | 1.42 | 0.61 | 0.72 | 0.42 | 98.06  | 0.18 | 97.88  |
| LCM-22 | a | 5  | 29.42 | 34.69 | 1.28 | 2.25 | 0.32 | 0.03 | 25.30 | 0.22 | 0.65 | 0.34 | 1.39 | 0.76 | 0.85 | 0.48 | 97.99  | 0.20 | 97.78  |
| LCM-22 | a | 6  | 29.31 | 33.66 | 1.35 | 2.27 | 0.28 | 0.04 | 25.51 | 0.25 | 0.71 | 0.42 | 1.45 | 0.79 | 0.86 | 0.42 | 97.31  | 0.17 | 97.13  |
| LCM-22 | a | 7  | 29.35 | 33.88 | 1.33 | 2.37 | 0.31 | 0.04 | 25.65 | 0.12 | 0.71 | 0.40 | 1.41 | 0.75 | 0.85 | 0.46 | 97.62  | 0.19 | 97.43  |
| LCM-22 | a | 8  | 29.36 | 34.23 | 1.34 | 2.41 | 0.26 | 0.04 | 25.52 | 0.21 | 0.67 | 0.42 | 1.53 | 0.78 | 0.80 | 0.43 | 97.99  | 0.18 | 97.81  |
| LCM-22 | a | 9  | 29.44 | 33.00 | 1.36 | 2.34 | 0.26 | 0.04 | 25.61 | 0.14 | 0.69 | 0.47 | 1.40 | 0.77 | 0.82 | 0.45 | 96.78  | 0.19 | 96.59  |
| LCM-22 | a | 10 | 29.48 | 34.03 | 1.31 | 2.36 | 0.28 | 0.04 | 25.69 | 0.16 | 0.68 | 0.39 | 1.59 | 0.78 | 0.78 | 0.44 | 98.00  | 0.18 | 97.82  |
| LCM-22 | a | 11 | 29.61 | 34.06 | 1.33 | 2.31 | 0.22 | 0.04 | 25.56 | 0.15 | 0.62 | 0.46 | 1.54 | 0.73 | 0.80 | 0.49 | 97.91  | 0.20 | 97.71  |
| LCM-22 | a | 12 | 29.41 | 34.04 | 1.33 | 2.38 | 0.27 | 0.03 | 25.66 | 0.10 | 0.63 | 0.44 | 1.44 | 0.74 | 0.81 | 0.40 | 97.69  | 0.17 | 97.51  |
| LCM-22 | a | 13 | 29.45 | 34.19 | 1.32 | 2.35 | 0.28 | 0.03 | 25.71 | 0.17 | 0.60 | 0.43 | 1.62 | 0.67 | 0.73 | 0.4  |        |      |        |



|        |        |     |       |       |      |      |      |      |       |      |      |      |      |      |      |      |       |      |       |
|--------|--------|-----|-------|-------|------|------|------|------|-------|------|------|------|------|------|------|------|-------|------|-------|
| LCM-23 | b      | 1   | 29.80 | 35.22 | 1.44 | 1.93 | 0.12 | 0.02 | 25.71 | 0.26 | 0.63 | 0.32 | 1.20 | 0.86 | 0.87 | 0.42 | 98.77 | 0.18 | 98.60 |
| LCM-23 | b      | 2   | 29.73 | 34.59 | 1.41 | 1.98 | 0.15 | 0.02 | 25.96 | 0.26 | 0.63 | 0.36 | 1.15 | 0.80 | 0.89 | 0.37 | 98.30 | 0.15 | 98.15 |
| LCM-23 | b      | 3   | 29.65 | 34.52 | 1.48 | 1.86 | 0.12 | 0.03 | 26.00 | 0.14 | 0.66 | 0.31 | 1.29 | 0.90 | 0.85 | 0.33 | 98.14 | 0.14 | 98.00 |
| LCM-23 | b      | 4   | 29.37 | 34.81 | 1.49 | 1.78 | 0.10 | 0.04 | 25.94 | 0.19 | 0.70 | 0.29 | 1.26 | 0.93 | 0.90 | 0.35 | 98.15 | 0.15 | 98.00 |
| LCM-23 | b      | 5   | 29.72 | 35.37 | 1.52 | 1.89 | 0.09 | 0.02 | 25.85 | 0.13 | 0.72 | 0.21 | 1.18 | 0.96 | 0.98 | 0.38 | 99.01 | 0.16 | 98.85 |
| LCM-23 | b      | 6   | 29.51 | 34.87 | 1.52 | 1.80 | 0.09 | 0.03 | 25.63 | 0.19 | 0.73 | 0.33 | 1.10 | 0.88 | 1.04 | 0.42 | 98.15 | 0.18 | 97.97 |
| LCM-23 | b      | 7   | 29.33 | 34.88 | 1.43 | 1.78 | 0.12 | 0.03 | 25.74 | 0.24 | 0.71 | 0.31 | 1.10 | 0.90 | 0.92 | 0.31 | 97.77 | 0.13 | 97.64 |
| LCM-23 | b      | 8   | 29.38 | 34.14 | 1.41 | 1.79 | 0.10 | 0.03 | 25.75 | 0.14 | 0.70 | 0.31 | 1.16 | 0.87 | 0.92 | 0.29 | 96.97 | 0.12 | 96.85 |
| LCM-23 | b      | 9   | 29.37 | 34.70 | 1.40 | 1.68 | 0.13 | 0.02 | 25.86 | 0.15 | 0.71 | 0.35 | 1.22 | 0.91 | 0.94 | 0.31 | 97.74 | 0.13 | 97.61 |
| LCM-23 | b      | 10  | 29.10 | 34.65 | 1.52 | 1.84 | 0.10 | 0.02 | 25.56 | 0.20 | 0.72 | 0.27 | 1.13 | 0.87 | 0.97 | 0.42 | 97.36 | 0.18 | 97.18 |
| LCM-23 | c      | 1.1 | 29.36 | 34.46 | 1.49 | 1.76 | 0.11 | 0.00 | 25.68 | 0.17 | 0.46 | 0.33 | 1.29 | 0.80 | 0.15 | 0.15 | 96.21 | 0.06 | 96.15 |
| LCM-23 | d      | 2.1 | 29.17 | 33.90 | 1.56 | 1.84 | 0.14 | 0.00 | 25.69 | 0.15 | 0.47 | 0.30 | 1.19 | 0.67 | 0.10 | 0.40 | 95.64 | 0.17 | 95.47 |
| LCM-23 | e      | 3.1 | 28.88 | 32.93 | 1.42 | 2.39 | 0.27 | 0.03 | 24.50 | 0.24 | 0.94 | 0.25 | 1.57 | 1.06 | 0.35 | 0.25 | 95.07 | 0.11 | 94.96 |
|        |        |     |       |       |      |      |      |      |       |      |      |      |      |      |      |      |       |      |       |
| LCM-25 | a      | 3   | 29.56 | 34.55 | 1.41 | 1.92 | 0.17 | 0.03 | 25.77 | 0.21 | 0.35 | 0.29 | 1.12 | 0.59 | 0.58 | 0.46 | 97.00 | 0.19 | 96.81 |
| LCM-25 | a      | 4   | 29.20 | 34.53 | 1.28 | 1.74 | 0.16 | 0.03 | 25.72 | 0.20 | 0.42 | 0.32 | 1.12 | 0.66 | 0.71 | 0.38 | 96.46 | 0.16 | 96.30 |
| LCM-25 | a      | 5   | 29.39 | 32.90 | 1.32 | 1.70 | 0.19 | 0.03 | 26.04 | 0.23 | 0.45 | 0.36 | 1.25 | 0.66 | 0.76 | 0.33 | 95.60 | 0.14 | 95.46 |
| LCM-25 | a      | 6   | 29.42 | 33.97 | 1.47 | 1.90 | 0.23 | 0.05 | 25.77 | 0.28 | 0.42 | 0.39 | 1.33 | 0.68 | 0.70 | 0.45 | 97.06 | 0.19 | 96.87 |
| LCM-25 | a      | 7   | 29.25 | 34.00 | 1.37 | 1.94 | 0.19 | 0.02 | 25.54 | 0.28 | 0.45 | 0.41 | 1.48 | 0.70 | 0.74 | 0.44 | 96.82 | 0.18 | 96.63 |
| LCM-25 | a      | 8   | 29.17 | 32.69 | 1.49 | 2.38 | 0.28 | 0.03 | 24.95 | 0.32 | 0.56 | 0.47 | 1.59 | 0.77 | 0.90 | 0.46 | 96.06 | 0.19 | 95.87 |
| LCM-25 | a      | 9   | 29.22 | 32.88 | 1.49 | 2.27 | 0.30 | 0.05 | 25.09 | 0.20 | 0.64 | 0.42 | 1.55 | 0.85 | 0.93 | 0.48 | 96.35 | 0.20 | 96.15 |
| LCM-25 | a      | 10  | 28.75 | 33.29 | 1.24 | 2.06 | 0.23 | 0.05 | 24.43 | 0.50 | 0.76 | 0.45 | 1.79 | 0.94 | 1.08 | 0.32 | 95.88 | 0.13 | 95.75 |
| LCM-25 | b      | 1   | 29.53 | 33.35 | 1.48 | 1.76 | 0.15 | 0.02 | 25.43 | 0.20 | 0.40 | 0.29 | 1.06 | 0.53 | 0.65 | 0.34 | 95.17 | 0.14 | 95.02 |
| LCM-25 | b      | 2   | 29.19 | 34.00 | 1.41 | 1.88 | 0.17 | 0.03 | 25.48 | 0.21 | 0.39 | 0.29 | 1.20 | 0.54 | 0.68 | 0.43 | 95.90 | 0.18 | 95.72 |
| LCM-25 | b      | 3   | 29.37 | 33.55 | 1.33 | 1.69 | 0.17 | 0.02 | 25.79 | 0.21 | 0.38 | 0.32 | 1.12 | 0.53 | 0.66 | 0.40 | 95.55 | 0.17 | 95.38 |
| LCM-25 | b      | 4   | 29.51 | 34.44 | 1.34 | 1.80 | 0.13 | 0.02 | 25.49 | 0.26 | 0.37 | 0.33 | 1.17 | 0.65 | 0.70 | 0.35 | 96.57 | 0.15 | 96.42 |
| LCM-25 | b      | 5   | 29.39 | 34.52 | 1.38 | 1.74 | 0.20 | 0.02 | 25.75 | 0.18 | 0.42 | 0.38 | 1.18 | 0.66 | 0.73 | 0.43 | 96.98 | 0.18 | 96.80 |
| LCM-25 | b      | 6   | 29.87 | 34.84 | 1.48 | 1.84 | 0.20 | 0.02 | 26.14 | 0.25 | 0.42 | 0.34 | 1.18 | 0.59 | 0.69 | 0.43 | 98.27 | 0.18 | 98.09 |
| LCM-25 | b      | 8   | 29.59 | 33.17 | 1.49 | 1.89 | 0.19 | 0.04 | 25.87 | 0.27 | 0.40 | 0.30 | 1.19 | 0.66 | 0.59 | 0.40 | 96.04 | 0.17 | 95.87 |
| LCM-25 | b      | 9   | 29.30 | 34.22 | 1.33 | 1.82 | 0.18 | 0.02 | 25.58 | 0.25 | 0.39 | 0.41 | 1.26 | 0.66 | 0.74 | 0.42 | 96.55 | 0.18 | 96.38 |
| LCM-25 | b      | 10  | 29.43 | 33.54 | 1.46 | 1.90 | 0.20 | 0.02 | 25.49 | 0.19 | 0.39 | 0.36 | 1.30 | 0.59 | 0.70 | 0.40 | 95.98 | 0.17 | 95.81 |
| LCM-25 | b      | 11  | 29.29 | 32.80 | 1.35 | 1.98 | 0.18 | 0.04 | 25.42 | 0.29 | 0.43 | 0.44 | 1.34 | 0.77 | 0.81 | 0.42 | 95.55 | 0.18 | 95.37 |
| LCM-25 | b      | 13  | 28.94 | 33.31 | 1.33 | 1.89 | 0.17 | 0.03 | 25.49 | 0.19 | 0.47 | 0.39 | 1.42 | 0.74 | 0.80 | 0.35 | 95.50 | 0.15 | 95.35 |
| LCM-25 | b      | 14  | 29.19 | 32.88 | 1.30 | 1.85 | 0.16 | 0.04 | 25.71 | 0.28 | 0.42 | 0.42 | 1.47 | 0.70 | 0.78 | 0.43 | 95.64 | 0.18 | 95.46 |
| LCM-25 | b      | 15  | 29.04 | 33.85 | 1.29 | 1.83 | 0.16 | 0.04 | 25.27 | 0.19 | 0.00 | 0.33 | 1.46 | 0.74 | 0.76 | 0.31 | 95.27 | 0.13 | 95.14 |
| LCM-25 | c      | 1.1 | 28.93 | 33.41 | 1.37 | 1.73 | 0.29 | 0.01 | 25.16 | 0.24 | 0.00 | 0.24 | 1.24 | 0.68 | 0.09 | 0.29 | 93.89 | 0.12 | 93.77 |
|        |        |     |       |       |      |      |      |      |       |      |      |      |      |      |      |      |       |      |       |
| LCM-32 | 1.1    |     | 29.41 | 35.45 | 1.38 | 1.62 | 0.20 | 0.02 | 26.33 |      | 0.32 | 0.27 | 0.93 | 0.49 | 0.14 | 0.01 | 96.58 | 0.01 | 96.58 |
| LCM-32 | 1.2rim |     | 29.22 | 34.85 | 1.33 | 1.84 | 0.18 | 0.01 | 26.20 |      | 0.35 | 0.24 | 1.07 | 0.64 | 0.07 | 0.01 | 95.99 | 0.01 | 95.98 |
| LCM-32 | 1.3rim |     | 29.37 | 35.42 | 1.37 | 1.58 | 0.20 | 0.02 | 26.31 |      | 0.34 | 0.29 | 1.02 | 0.57 | 0.15 | 0.02 | 96.65 | 0.01 | 96.64 |
| LCM-32 | .4core |     | 29.16 | 35.30 | 1.67 | 1.62 | 0.16 | 0.02 | 26.42 |      | 0.43 | 0.34 | 0.95 | 0.54 | 0.10 | 0.00 | 96.69 | 0.00 | 96.69 |
| LCM-32 | .5core |     | 29.53 | 35.22 | 1.38 | 1.65 | 0.16 | 0.02 | 26.29 |      | 0.29 | 0.33 | 0.98 | 0.49 | 0.17 | 0.01 | 96.51 | 0.00 | 96.51 |
| LCM-32 | .1core |     | 29.51 | 34.62 | 1.49 | 1.71 | 0.14 | 0.02 | 25.88 |      | 0.41 | 0.30 | 1.19 | 0.59 | 0.10 | 0.02 | 95.99 | 0.01 | 95.99 |
| LCM-32 | .2 rim |     | 28.83 | 34.69 | 1.53 | 1.70 | 0.18 | 0.01 | 25.66 |      | 0.42 | 0.26 | 1.18 | 0.71 | 0.12 | 0.03 | 95.31 | 0.01 | 95.30 |
| LCM-32 | .3core |     | 29.70 | 34.36 | 1.88 | 1.64 | 0.16 | 0.03 | 25.70 |      | 0.43 | 0.35 | 1.07 | 0.63 | 0.15 | 0.00 | 96.11 | 0.00 | 96.11 |
| LCM-32 | 2.4rim |     | 29.94 | 34.50 | 1.44 | 1.67 | 0.18 | 0.01 | 26.05 |      | 0.45 | 0.33 | 1.14 | 0.59 | 0.14 | 0.02 | 96.46 | 0.01 | 96.45 |
| LCM-32 | .5core |     | 29.30 | 33.90 | 2.20 | 1.69 | 0.18 | 0.01 | 25.54 |      | 0.35 | 0.36 | 1.20 | 0.55 | 0.14 | 0.04 | 95.44 | 0.02 | 95.43 |
| LCM-32 | .1core |     | 29.60 | 34.85 | 1.25 | 1.56 | 0.17 | 0.01 | 26.02 |      | 0.37 | 0.37 | 1.19 | 0.58 | 0.15 | 0.00 | 96.11 | 0.00 | 96.11 |
| LCM-32 | .3core |     | 29.46 | 35.13 | 1.40 | 1.66 | 0.16 | 0.03 | 26.18 |      | 0.43 | 0.43 | 1.13 | 0.60 | 0.09 | 0.03 | 96.71 | 0.01 | 96.70 |
| LCM-32 | 3.4rim |     | 30.32 | 34.76 | 1.40 | 1.66 | 0.17 | 0.02 | 26.41 |      | 0.34 | 0.34 | 1.21 | 0.63 | 0.15 | 0.01 | 97.41 | 0.01 | 97.40 |
| LCM-32 | .5core |     | 29.29 | 34.80 | 1.42 | 1.62 | 0.16 | 0.01 | 26.06 |      | 0.40 | 0.31 | 1.08 | 0.55 | 0.13 | 0.00 | 95.84 | 0.00 | 95.84 |
| LCM-32 | 4.1    |     | 29.16 | 34.33 | 1.46 | 2.00 | 0.25 | 0.03 | 25.53 |      | 0.49 | 0.37 | 1.42 | 0.87 | 0.18 | 0.01 | 96.09 | 0.00 | 96.08 |
| LCM-32 | 4.2rim |     | 28.49 | 34.67 | 1.56 | 1.69 | 0.20 | 0.02 | 26.06 |      | 0.46 | 0.27 | 1.13 | 0.67 | 0.14 | 0.00 | 95.34 | 0.00 | 95.34 |
| LCM-32 | 4.3rim |     | 29.60 | 33.88 | 1.69 | 2.05 | 0.20 | 0.03 | 25.44 |      | 0.49 | 0.37 | 1.52 | 0.80 | 0.14 | 0.00 | 96.21 | 0.00 | 96.21 |
| LCM-32 | .4core |     | 29.63 | 33.91 | 1.62 | 2.25 | 0.27 | 0.03 | 25.50 |      | 0.56 | 0.34 | 1.52 | 0.80 | 0.21 | 0.03 | 96.67 | 0.01 | 96.65 |
| LCM-32 | .1core |     | 29.01 | 33.71 | 1.50 | 2.29 | 0.28 | 0.05 | 25.10 |      | 0.73 | 0.31 | 1.40 | 0.90 | 0.19 | 0.01 | 95.47 | 0.01 | 95.47 |
| LCM-32 | .3core |     | 29.55 | 33.62 | 1.62 | 2.10 | 0.25 | 0.03 | 25.41 |      | 0.51 | 0.36 | 1.37 | 0.74 | 0.15 | 0.02 | 95.72 | 0.01 | 95.72 |
| LCM-32 | 5.4rim |     | 28.81 | 33.25 | 2.17 | 2.24 |      |      |       |      |      |      |      |      |      |      |       |      |       |

|        |   |     |       |       |      |      |      |      |       |      |      |      |      |      |      |      |      |       |      |       |
|--------|---|-----|-------|-------|------|------|------|------|-------|------|------|------|------|------|------|------|------|-------|------|-------|
| LCM-33 | a | 7   | 29.33 | 34.09 | 1.27 | 1.81 | 0.14 | 0.03 | 25.99 | 0.28 |      | 0.46 | 0.31 | 1.36 | 0.66 | 0.76 | 0.42 | 96.90 | 0.18 | 96.72 |
| LCM-33 | a | 8   | 29.19 | 34.37 | 1.31 | 1.90 | 0.20 | 0.02 | 25.78 | 0.25 |      | 0.41 | 0.32 | 1.28 | 0.69 | 0.64 | 0.41 | 96.77 | 0.17 | 96.60 |
| LCM-33 | a | 9   | 29.06 | 34.19 | 1.36 | 1.79 | 0.22 | 0.04 | 25.62 | 0.32 |      | 0.43 | 0.42 | 1.24 | 0.66 | 0.74 | 0.41 | 96.49 | 0.17 | 96.32 |
| LCM-33 | a | 10  | 29.30 | 34.34 | 1.28 | 1.82 | 0.25 | 0.05 | 25.74 | 0.24 |      | 0.43 | 0.36 | 1.31 | 0.69 | 0.71 | 0.36 | 96.88 | 0.15 | 96.73 |
| LCM-33 | a | 11  | 29.23 | 34.25 | 1.26 | 1.80 | 0.16 | 0.02 | 25.64 | 0.27 |      | 0.45 | 0.37 | 1.30 | 0.66 | 0.79 | 0.33 | 96.52 | 0.14 | 96.38 |
| LCM-33 | a | 12  | 29.20 | 35.21 | 1.28 | 1.54 | 0.22 | 0.02 | 25.57 | 0.34 |      | 0.35 | 0.53 | 1.56 | 0.76 | 0.73 | 0.28 | 97.58 | 0.12 | 97.47 |
| LCM-33 | a | 13  | 29.24 | 35.08 | 1.14 | 1.58 | 0.17 | 0.02 | 25.32 | 0.36 |      | 0.42 | 0.48 | 1.38 | 0.76 | 0.93 | 0.28 | 97.17 | 0.12 | 97.05 |
| LCM-33 | a | 14  | 29.32 | 34.31 | 1.28 | 1.79 | 0.20 | 0.03 | 25.45 | 0.27 |      | 0.44 | 0.43 | 1.38 | 0.69 | 0.86 | 0.35 | 96.79 | 0.15 | 96.65 |
| LCM-33 | a | 15  | 29.33 | 33.91 | 1.27 | 1.75 | 0.16 | 0.04 | 25.93 | 0.30 |      | 0.39 | 0.34 | 1.29 | 0.71 | 0.71 | 0.39 | 96.51 | 0.16 | 96.35 |
| LCM-33 | a | 16  | 29.39 | 34.52 | 1.29 | 1.77 | 0.14 | 0.03 | 25.88 | 0.31 |      | 0.45 | 0.46 | 1.35 | 0.69 | 0.77 | 0.39 | 97.41 | 0.16 | 97.25 |
| LCM-33 | a | 17  | 29.30 | 34.12 | 1.30 | 1.77 | 0.18 | 0.04 | 25.80 | 0.25 |      | 0.40 | 0.32 | 1.24 | 0.72 | 0.74 | 0.31 | 96.47 | 0.13 | 96.34 |
| LCM-33 | a | 18  | 29.41 | 34.05 | 1.34 | 1.80 | 0.18 | 0.02 | 25.85 | 0.24 |      | 0.42 | 0.41 | 1.08 | 0.70 | 0.68 | 0.44 | 96.61 | 0.18 | 96.43 |
| LCM-33 | a | 19  | 29.47 | 34.91 | 1.31 | 1.83 | 0.20 | 0.01 | 25.94 | 0.24 |      | 0.39 | 0.39 | 1.14 | 0.64 | 0.60 | 0.43 | 97.47 | 0.18 | 97.29 |
| LCM-33 | a | 20  | 29.43 | 35.16 | 1.38 | 1.82 | 0.16 | 0.03 | 25.97 | 0.21 |      | 0.38 | 0.37 | 1.12 | 0.67 | 0.59 | 0.47 | 97.76 | 0.20 | 97.57 |
| LCM-33 | b | 1   | 28.77 | 34.25 | 1.34 | 1.52 | 0.17 | 0.18 | 25.23 | 0.24 |      | 0.35 | 0.37 | 1.06 | 0.59 | 0.59 | 0.46 | 95.11 | 0.19 | 94.91 |
| LCM-33 | b | 2   | 29.46 | 34.56 | 1.37 | 1.67 | 0.17 | 0.02 | 25.91 | 0.28 |      | 0.44 | 0.34 | 1.12 | 0.59 | 0.63 | 0.45 | 97.02 | 0.19 | 96.82 |
| LCM-33 | b | 3   | 29.36 | 34.72 | 1.32 | 1.83 | 0.15 | 0.04 | 25.76 | 0.22 |      | 0.48 | 0.37 | 1.28 | 0.77 | 0.85 | 0.37 | 97.51 | 0.15 | 97.35 |
| LCM-33 | b | 4   | 29.00 | 35.39 | 1.17 | 1.75 | 0.17 | 0.05 | 25.72 | 0.45 |      | 0.51 | 0.37 | 1.38 | 0.74 | 0.79 | 0.35 | 97.84 | 0.15 | 97.69 |
| LCM-33 | b | 5   | 29.42 | 34.24 | 1.36 | 1.94 | 0.21 | 0.04 | 25.25 | 0.31 |      | 0.45 | 0.37 | 1.38 | 0.65 | 0.87 | 0.30 | 96.77 | 0.13 | 96.65 |
| LCM-33 | b | 6   | 29.28 | 34.24 | 1.34 | 2.00 | 0.22 | 0.05 | 25.58 | 0.31 |      | 0.51 | 0.40 | 1.46 | 0.72 | 0.96 | 0.40 | 97.45 | 0.17 | 97.28 |
| LCM-33 | b | 7   | 29.31 | 34.28 | 1.41 | 1.95 | 0.21 | 0.04 | 25.40 | 0.36 |      | 0.47 | 0.37 | 1.57 | 0.76 | 0.86 | 0.44 | 97.42 | 0.18 | 97.23 |
| LCM-33 | b | 8   | 29.11 | 33.84 | 1.37 | 2.11 | 0.20 | 0.05 | 25.34 | 0.29 |      | 0.43 | 0.41 | 1.47 | 0.76 | 0.65 | 0.44 | 96.46 | 0.18 | 96.27 |
| LCM-33 | b | 9   | 29.22 | 33.73 | 1.30 | 2.04 | 0.24 | 0.04 | 25.26 | 0.25 |      | 0.47 | 0.34 | 1.44 | 0.82 | 0.77 | 0.40 | 96.32 | 0.17 | 96.15 |
| LCM-33 | b | 10  | 29.17 | 34.18 | 1.37 | 2.11 | 0.23 | 0.03 | 25.44 | 0.31 |      | 0.44 | 0.40 | 1.41 | 0.76 | 0.73 | 0.35 | 96.92 | 0.15 | 96.77 |
| LCM-33 | b | 11  | 29.20 | 34.19 | 1.31 | 1.84 | 0.23 | 0.03 | 25.29 | 0.34 |      | 0.49 | 0.42 | 1.54 | 0.88 | 0.89 | 0.31 | 96.96 | 0.13 | 96.83 |
| LCM-33 | b | 12  | 29.28 | 34.53 | 1.31 | 1.90 | 0.18 | 0.04 | 24.93 | 0.41 |      | 0.50 | 0.54 | 1.70 | 0.89 | 0.99 | 0.26 | 97.47 | 0.11 | 97.36 |
| LCM-33 | b | 13  | 29.20 | 33.95 | 1.26 | 1.88 | 0.21 | 0.04 | 25.14 | 0.40 |      | 0.50 | 0.45 | 1.60 | 0.84 | 0.98 | 0.32 | 96.78 | 0.13 | 96.65 |
| LCM-33 | b | 14  | 29.56 | 34.09 | 1.47 | 2.12 | 0.19 | 0.04 | 25.53 | 0.34 |      | 0.49 | 0.38 | 1.48 | 0.73 | 0.81 | 0.47 | 97.69 | 0.20 | 97.49 |
| LCM-33 | b | 15  | 29.52 | 34.17 | 1.37 | 1.99 | 0.20 | 0.04 | 24.94 | 0.28 |      | 0.44 | 0.39 | 1.40 | 0.79 | 0.80 | 0.49 | 96.80 | 0.21 | 96.59 |
| LCM-33 | c | 1.1 | 29.16 | 33.47 | 1.38 | 2.09 | 0.34 | 0.03 | 24.84 | 0.36 |      | 0.55 | 0.44 | 1.40 | 0.70 | 0.12 | 0.42 | 95.32 | 0.18 | 95.15 |
| LCM-33 | d | 2.1 | 29.26 | 34.41 | 1.30 | 1.65 | 0.17 | 0.00 | 25.86 | 0.21 | 0.12 | 0.26 | 0.31 | 1.23 | 0.61 | 0.16 | 0.60 | 96.14 | 0.25 | 95.89 |
|        |   |     |       |       |      |      |      |      |       |      |      |      |      |      |      |      |      |       |      |       |
| LCM-39 | a | 1   | 29.62 | 35.03 | 1.32 | 1.69 | 0.18 | 0.03 | 25.91 | 0.26 |      | 0.41 | 0.35 | 1.18 | 0.63 | 0.60 | 0.38 | 97.57 | 0.16 | 97.42 |
| LCM-39 | a | 2   | 29.58 | 34.47 | 1.33 | 1.80 | 0.16 | 0.02 | 25.73 | 0.17 |      | 0.42 | 0.36 | 1.23 | 0.66 | 0.66 | 0.42 | 97.01 | 0.17 | 96.84 |
| LCM-39 | a | 3   | 29.42 | 33.67 | 1.30 | 1.86 | 0.16 | 0.03 | 25.89 | 0.27 |      | 0.39 | 0.40 | 1.35 | 0.74 | 0.76 | 0.30 | 96.53 | 0.13 | 96.40 |
| LCM-39 | a | 4   | 29.31 | 33.87 | 1.28 | 1.76 | 0.18 | 0.02 | 25.64 | 0.41 |      | 0.41 | 0.52 | 1.70 | 0.79 | 0.89 | 0.33 | 97.09 | 0.14 | 96.95 |
| LCM-39 | a | 5   | 29.41 | 34.71 | 1.27 | 1.52 | 0.18 | 0.01 | 25.40 | 0.40 |      | 0.36 | 0.56 | 1.61 | 0.74 | 0.81 | 0.24 | 97.21 | 0.10 | 97.11 |
| LCM-39 | a | 6   | 33.21 | 32.30 | 1.62 | 1.45 | 0.19 | 0.03 | 23.98 | 0.42 |      | 0.32 | 0.47 | 1.57 | 0.61 | 0.72 | 0.31 | 97.19 | 0.13 | 97.06 |
| LCM-39 | a | 7   | 29.33 | 34.64 | 1.28 | 1.48 | 0.20 | 0.02 | 25.75 | 0.41 |      | 0.37 | 0.50 | 1.59 | 0.72 | 0.83 | 0.30 | 97.40 | 0.13 | 97.28 |
| LCM-39 | a | 8   | 29.40 | 34.56 | 1.19 | 1.76 | 0.18 | 0.03 | 25.94 | 0.30 |      | 0.42 | 0.42 | 1.32 | 0.83 | 0.81 | 0.33 | 97.49 | 0.14 | 97.35 |
| LCM-39 | a | 9   | 29.48 | 34.51 | 1.36 | 2.14 | 0.19 | 0.01 | 25.91 | 0.25 |      | 0.41 | 0.29 | 1.31 | 0.66 | 0.74 | 0.42 | 97.70 | 0.18 | 97.52 |
| LCM-39 | a | 10  | 29.44 | 35.43 | 1.15 | 1.67 | 0.21 | 0.01 | 25.50 | 0.40 |      | 0.41 | 0.43 | 1.45 | 0.72 | 0.84 | 0.31 | 97.96 | 0.13 | 97.83 |
| LCM-39 | c | 1.1 | 30.02 | 35.93 | 1.31 | 1.83 | 0.24 | 0.00 | 26.47 | 0.29 | 0.30 | 0.26 | 0.46 | 1.44 | 0.64 | 0.16 | 0.38 | 99.74 | 0.16 | 99.58 |
|        |   |     |       |       |      |      |      |      |       |      |      |      |      |      |      |      |      |       |      |       |
| DQW-21 | a | 1   | 28.53 | 33.06 | 0.84 | 3.27 | 0.59 | 0.07 | 23.53 | 0.15 | 0.00 | 1.90 | 0.25 | 1.14 | 1.25 | 0.40 | 0.36 | 95.34 | 0.15 | 95.19 |
| DQW-21 | a | 2   | 28.84 | 33.03 | 0.93 | 3.14 | 0.53 | 0.05 | 23.93 | 0.22 | 0.05 | 1.84 | 0.24 | 1.30 | 1.15 | 0.44 | 0.27 | 95.95 | 0.12 | 95.83 |
| DQW-21 | a | 3   | 28.69 | 33.16 | 0.98 | 3.07 | 0.50 | 0.08 | 23.89 | 0.22 | 0.00 | 1.91 | 0.24 | 1.21 | 1.17 | 0.35 | 0.46 | 95.92 | 0.19 | 95.73 |
| DQW-21 | a | 4   | 28.27 | 33.11 | 0.95 | 3.16 | 0.48 | 0.06 | 23.57 | 0.33 | 0.00 | 1.93 | 0.26 | 1.30 | 1.16 | 0.44 | 0.27 | 95.27 | 0.12 | 95.16 |
| DQW-21 | a | 5   | 28.60 | 33.34 | 0.91 | 3.15 | 0.47 | 0.07 | 23.72 | 0.17 | 0.16 | 1.94 | 0.26 | 1.28 | 1.27 | 0.42 | 0.29 | 96.05 | 0.12 | 95.93 |
| DQW-21 | a | 6   | 28.75 | 33.18 | 0.99 | 3.08 | 0.48 | 0.07 | 23.87 | 0.18 | 0.00 | 1.72 | 0.29 | 1.32 | 1.36 | 0.42 | 0.31 | 96.01 | 0.13 | 95.88 |
| DQW-21 | a | 7   | 28.49 | 32.83 | 0.87 | 3.23 | 0.53 | 0.06 | 23.58 | 0.01 | 0.09 | 1.95 | 0.26 | 1.23 | 1.27 | 0.45 | 0.27 | 95.10 | 0.12 | 94.99 |
| DQW-21 | a | 8   | 28.72 | 33.27 | 0.85 | 3.17 | 0.51 | 0.07 | 23.60 | 0.16 | 0.00 | 1.92 | 0.30 | 1.20 | 1.19 | 0.39 | 0.35 | 95.70 | 0.15 | 95.55 |
| DQW-21 | a | 9   | 28.54 | 33.63 | 0.81 | 3.17 | 0.53 | 0.07 | 23.49 | 0.26 | 0.00 | 1.91 | 0.33 | 1.12 | 1.20 | 0.43 | 0.31 | 95.79 | 0.13 | 95.67 |
| DQW-21 | a | 10  | 28.72 | 33.19 | 0.84 | 3.30 | 0.53 | 0.07 | 23.68 | 0.08 | 0.00 | 1.86 | 0.25 | 1.24 | 1.25 | 0.45 | 0.32 | 95.76 | 0.13 | 95.63 |
| DQW-21 | a | 11  | 28.79 | 32.63 | 0.91 | 3.47 | 0.58 | 0.07 | 23.80 | 0.30 | 0.12 | 1.95 | 0.27 | 1.25 | 1.11 | 0.33 | 0.33 | 95.91 | 0.14 | 95.77 |
| DQW-21 | a | 12  | 28.91 | 33.40 | 0.78 | 3.24 | 0.59 | 0.04 | 24.20 | 0.38 | 0.00 | 1.77 | 0.28 | 1.22 | 1.07 | 0.34 | 0.36 | 96.58 | 0.15 | 96.43 |
| DQW-21 | a | 15  | 28.75 | 33.47 | 0.79 | 3.04 | 0.53 | 0.06 | 24.06 | 0.12 | 0.10 | 1.67 | 0.25 | 1.09 | 1.04 | 0.39 | 0.36 | 95.74 | 0.15 | 95.59 |
| DQW-21 | a | 16  | 28.64 | 33.66 | 0.81 | 3.25 | 0.52 | 0.08 | 23.76 | 0.16 | 0.19 | 1.82 | 0.26 | 1.23 | 1.12 | 0.40 | 0.29 | 96.19 | 0.12 | 96.06 |
| DQW-21 | a | 17  | 28.64 | 33.42 | 0.77 | 3.17 | 0.56 | 0.07 | 23.78 | 0.23 | 0.05 | 1.82 | 0.24 | 1.23 | 1.16 | 0.36 | 0.35 | 95.84 | 0.15 | 95.69 |
| DQW-21 | a | 18  | 28.60 | 33.01 | 0.88 | 3.42 | 0.62 | 0.08 | 23.75 | 0.18 | 0.00 | 1.79 | 0.27 | 1.30 | 1.05 | 0.32 | 0.46 | 95.72 | 0.19 | 95.53 |
| DQW-21 | a | 19  | 29.02 | 33.04 | 0.86 | 3.29 | 0.53 | 0.08 | 24.22 | 0.25 | 0.00 | 1.74 | 0.33 | 1.22 | 1.04 | 0.34 | 0.46 | 96.42 | 0.19 | 96.23 |
| DQW-21 | a | 20  | 28.88 | 32.64 | 0.96 | 3.78 | 0.57 | 0.07 | 24.29 | 0.26 | 0.00 | 1.82 | 0.26 | 1.00 | 0.93 | 0.35 | 0.57 | 96.37 | 0.24 | 96.14 |
| DQW-21 | a | 21  | 29.03 | 32.95 | 0.94 | 3.79 | 0.58 | 0.07 | 24.18 | 0.10 | 0.03 | 1.77 | 0.21 | 1.03 | 0.99 | 0.28 | 0.57 | 96.52 | 0.24 | 96.28 |
| DQW-21 | a | 22  | 28.82 | 32.75 | 0.89 | 3.71 | 0.53 | 0.09 | 24.30 | 0.00 | 0.00 | 1.81 | 0.28 | 1.10 | 0.95 | 0.32 | 0.61 | 96.15 | 0.26 | 95.89 |
| DQW-21 | a | 23  | 29.04 | 32.75 | 0.94 | 3.76 | 0.61 | 0.10 | 24.35 | 0.26 | 0.00 | 1.85 | 0.22 | 1.06 | 0.92 | 0.29 | 0.59 | 96.73 | 0.25 | 96.49 |

|         |     |    |       |       |      |      |      |      |       |      |      |      |      |      |      |      |      |        |      |       |
|---------|-----|----|-------|-------|------|------|------|------|-------|------|------|------|------|------|------|------|------|--------|------|-------|
| DQW-21  | b   | 15 | 28.87 | 33.23 | 0.83 | 3.14 | 0.59 | 0.06 | 24.14 | 0.18 | 0.06 | 1.78 | 0.23 | 1.12 | 0.95 | 0.32 | 0.46 | 95.95  | 0.19 | 95.76 |
| DQW-21  | b   | 16 | 28.98 | 33.29 | 0.82 | 3.44 | 0.57 | 0.08 | 24.24 | 0.16 | 0.00 | 1.76 | 0.27 | 1.09 | 0.95 | 0.33 | 0.44 | 96.42  | 0.19 | 96.24 |
| DQW-21  | b   | 17 | 29.04 | 33.38 | 0.86 | 3.36 | 0.56 | 0.06 | 24.15 | 0.27 | 0.00 | 1.81 | 0.24 | 1.07 | 0.90 | 0.35 | 0.41 | 96.44  | 0.17 | 96.27 |
| DQW-21  | b   | 18 | 29.13 | 33.36 | 0.83 | 3.40 | 0.58 | 0.05 | 24.62 | 0.13 | 0.00 | 1.65 | 0.26 | 0.98 | 0.87 | 0.31 | 0.39 | 96.55  | 0.16 | 96.39 |
| DQW-21  | b   | 19 | 29.09 | 32.75 | 0.82 | 3.34 | 0.54 | 0.08 | 24.32 | 0.34 | 0.00 | 1.69 | 0.23 | 1.03 | 0.90 | 0.29 | 0.51 | 95.92  | 0.22 | 95.70 |
| DQW-21  | b   | 20 | 29.12 | 32.94 | 0.82 | 3.39 | 0.60 | 0.07 | 24.53 | 0.20 | 0.00 | 1.61 | 0.21 | 0.98 | 0.97 | 0.31 | 0.52 | 96.24  | 0.22 | 96.02 |
| DQW-21  | c   |    | 28.48 | 32.93 | 1.01 | 3.84 | 0.52 | 0.07 | 23.05 | 0.11 | 0.00 | 1.79 | 0.16 | 1.20 | 1.30 | 0.44 | 0.62 | 95.49  | 0.26 | 95.23 |
| DQW-21  | c   |    | 28.85 | 33.15 | 0.87 | 3.71 | 0.70 | 0.08 | 23.26 | 0.37 | 0.14 | 1.79 | 0.35 | 1.12 | 1.06 | 0.38 | 0.35 | 96.20  | 0.15 | 96.05 |
| DQW-21  | c   |    | 29.01 | 33.26 | 0.95 | 3.58 | 0.63 | 0.06 | 22.48 | 0.26 | 0.00 | 1.55 | 0.33 | 1.32 | 1.07 | 0.38 | 0.72 | 95.61  | 0.30 | 95.30 |
| DQW-21  | d   |    | 29.09 | 33.25 | 0.90 | 3.52 | 0.65 | 0.06 | 22.52 | 0.28 | 0.00 | 1.62 | 0.21 | 1.23 | 1.20 | 0.42 | 0.45 | 95.38  | 0.19 | 95.19 |
| DQW-21  | e   |    | 28.81 | 33.45 | 0.92 | 3.46 | 0.66 | 0.07 | 22.66 | 0.35 | 0.01 | 1.75 | 0.19 | 1.33 | 1.27 | 0.43 | 0.36 | 95.73  | 0.15 | 95.58 |
|         |     |    |       |       |      |      |      |      |       |      |      |      |      |      |      |      |      |        |      |       |
| MC-8    | 2.1 |    | 30.29 | 35.98 | 1.63 | 1.74 | 0.23 | 0.00 | 26.33 | 0.10 | 0.00 | 0.09 | 0.13 | 0.42 | 0.32 | 0.11 | 0.37 | 97.74  | 0.16 | 97.59 |
| MC-8    | 3.1 |    | 30.08 | 35.92 | 1.62 | 1.75 | 0.19 | 0.00 | 26.48 | 0.24 | 0.00 | 0.17 | 0.08 | 0.41 | 0.31 | 0.11 | 0.35 | 97.71  | 0.15 | 97.57 |
| MC-8    | 4.1 |    | 30.00 | 35.46 | 1.74 | 1.54 | 0.13 | 0.00 | 26.52 | 0.19 | 0.42 | 0.03 | 0.24 | 0.67 | 0.44 | 0.08 | 0.50 | 97.96  | 0.21 | 97.75 |
| MC-8    | 4.2 |    | 29.35 | 35.38 | 1.70 | 1.56 | 0.18 | 0.00 | 26.60 | 0.18 | 0.00 | 0.02 | 0.30 | 0.65 | 0.42 | 0.14 | 0.23 | 96.72  | 0.10 | 96.62 |
|         |     |    |       |       |      |      |      |      |       |      |      |      |      |      |      |      |      |        |      |       |
| MC-17.9 | 2.1 |    | 29.99 | 36.21 | 1.30 | 1.51 | 0.20 | 0.00 | 26.59 | 0.45 | 0.00 | 0.07 | 0.26 | 0.73 | 0.25 | 0.11 | 0.50 | 98.15  | 0.21 | 97.94 |
| MC-17.9 | 5.1 |    | 30.17 | 35.49 | 1.62 | 1.67 | 0.12 | 0.00 | 25.98 | 0.30 | 0.03 | 0.11 | 0.16 | 0.69 | 0.37 | 0.11 | 0.29 | 97.11  | 0.12 | 96.99 |
|         |     |    |       |       |      |      |      |      |       |      |      |      |      |      |      |      |      |        |      |       |
| MC-19   | 1.1 |    | 29.62 | 36.43 | 1.52 | 1.86 | 0.17 | 0.01 | 26.94 | 0.19 | 0.12 | 0.32 | 0.18 | 0.85 | 0.46 | 0.19 | 0.62 | 99.47  | 0.26 | 99.22 |
| MC-19   | 2.1 |    | 28.94 | 35.77 | 1.30 | 1.50 | 0.23 | 0.00 | 25.61 | 0.29 | 0.00 | 0.35 | 0.53 | 1.97 | 1.05 | 0.20 | 0.00 | 97.73  | 0.00 | 97.73 |
| MC-19   | 4.1 |    | 28.51 | 33.47 | 1.75 | 2.78 | 0.28 | 0.03 | 24.98 | 0.18 | 0.00 | 1.01 | 0.34 | 1.50 | 1.28 | 0.39 | 0.51 | 97.02  | 0.21 | 96.80 |
|         |     |    |       |       |      |      |      |      |       |      |      |      |      |      |      |      |      |        |      |       |
| MC-26   | 1.1 |    | 30.00 | 36.39 | 1.55 | 1.58 | 0.24 | 0.00 | 27.44 | 0.16 | 0.31 | 0.13 | 0.29 | 0.84 | 0.28 | 0.04 | 0.76 | 99.99  | 0.32 | 99.67 |
| MC-26   | 2.1 |    | 28.92 | 36.20 | 1.31 | 1.53 | 0.18 | 0.00 | 27.06 | 0.29 | 0.00 | 0.19 | 0.11 | 0.68 | 0.42 | 0.11 | 0.01 | 96.99  | 0.01 | 96.98 |
| MC-26   | 3.1 |    | 30.07 | 35.50 | 1.76 | 2.16 | 0.11 | 0.01 | 27.35 | 0.21 | 0.04 | 0.10 | 0.30 | 0.73 | 0.36 | 0.09 | 1.11 | 99.90  | 0.47 | 99.43 |
| MC-26   | 3.2 |    | 30.15 | 35.87 | 1.70 | 2.12 | 0.17 | 0.00 | 27.52 | 0.18 | 0.13 | 0.00 | 0.27 | 0.77 | 0.30 | 0.08 | 1.20 | 100.45 | 0.50 | 99.94 |
| MC-26   | 4.1 |    | 29.67 | 36.58 | 1.49 | 1.53 | 0.18 | 0.00 | 27.42 | 0.16 | 0.02 | 0.05 | 0.28 | 0.71 | 0.25 | 0.07 | 0.50 | 98.90  | 0.21 | 98.69 |
|         |     |    |       |       |      |      |      |      |       |      |      |      |      |      |      |      |      |        |      |       |
| MC-27.5 | 1.1 |    | 29.02 | 34.40 | 0.64 | 3.42 | 0.68 | 0.05 | 23.54 | 0.26 | 0.00 | 1.28 | 0.31 | 1.34 | 1.06 | 0.27 | 0.31 | 96.56  | 0.13 | 96.43 |
| MC-27.5 | 1.2 |    | 29.02 | 34.31 | 0.66 | 3.40 | 0.73 | 0.02 | 23.06 | 0.22 | 0.00 | 1.38 | 0.47 | 1.26 | 1.24 | 0.36 | 0.18 | 96.32  | 0.08 | 96.24 |
| MC-27.5 | 2.1 |    | 29.01 | 35.04 | 0.51 | 2.86 | 0.71 | 0.04 | 22.92 | 0.10 | 0.27 | 1.22 | 0.32 | 1.64 | 1.23 | 0.44 | 0.34 | 96.63  | 0.14 | 96.49 |
| MC-27.5 | 3.1 |    | 28.93 | 34.12 | 1.54 | 2.76 | 0.42 | 0.01 | 23.79 | 0.35 | 0.00 | 1.45 | 0.43 | 1.01 | 1.26 | 0.41 | 0.17 | 96.63  | 0.07 | 96.56 |
| MC-27.5 | 4.1 |    | 29.24 | 35.03 | 1.31 | 2.01 | 0.24 | 0.00 | 23.84 | 0.35 | 0.08 | 1.03 | 0.36 | 1.54 | 1.35 | 0.27 | 0.16 | 96.81  | 0.07 | 96.74 |
| MC-27.5 | 5.1 |    | 28.10 | 33.32 | 1.49 | 3.05 | 0.41 | 0.01 | 24.02 | 0.39 | 0.00 | 1.46 | 0.31 | 2.15 | 1.59 | 0.49 | 0.17 | 96.98  | 0.07 | 96.90 |
| MC-27.5 | 6.1 |    | 28.78 | 34.51 | 1.44 | 2.56 | 0.28 | 0.00 | 25.09 | 0.44 | 0.17 | 1.29 | 0.44 | 1.61 | 1.12 | 0.33 | 0.44 | 98.52  | 0.19 | 98.34 |
| MC-27.5 | 7.1 |    | 28.65 | 34.11 | 1.38 | 2.56 | 0.41 | 0.00 | 25.04 | 0.12 | 0.00 | 0.91 | 0.32 | 1.41 | 1.16 | 0.39 | 0.22 | 96.69  | 0.09 | 96.60 |
|         |     |    |       |       |      |      |      |      |       |      |      |      |      |      |      |      |      |        |      |       |
| MC-43   | 1.1 |    | 30.18 | 35.16 | 1.93 | 1.73 | 0.18 | 0.00 | 26.19 | 0.17 | 0.00 | 0.09 | 0.23 | 1.20 | 0.34 | 0.07 | 0.51 | 97.97  | 0.21 | 97.76 |
| MC-43   | 3.1 |    | 28.92 | 33.27 | 1.06 | 3.23 | 0.64 | 0.03 | 23.29 | 0.35 | 0.63 | 1.65 | 0.24 | 1.38 | 1.08 | 0.34 | 0.47 | 96.58  | 0.20 | 96.38 |
| MC-43   | 4.1 |    | 28.99 | 33.27 | 1.00 | 3.71 | 0.61 | 0.05 | 22.87 | 0.19 | 0.00 | 1.75 | 0.18 | 1.30 | 1.22 | 0.43 | 0.62 | 96.17  | 0.26 | 95.91 |
| MC-43   | 5.1 |    | 29.88 | 35.62 | 1.47 | 2.04 | 0.15 | 0.00 | 26.25 | 0.25 | 0.24 | 0.12 | 0.16 | 0.76 | 0.24 | 0.00 | 0.40 | 97.59  | 0.17 | 97.42 |
| MC-43   | 6.1 |    | 30.07 | 36.34 | 1.43 | 1.76 | 0.15 | 0.00 | 25.76 | 0.25 | 0.00 | 0.12 | 0.08 | 0.66 | 0.39 | 0.03 | 0.41 | 97.44  | 0.17 | 97.27 |

## Electron microprobe analyses of titanite from volcanic ash beds in the Morrison Formation (wt%)

| Sample | Grain | P2O5  | SiO2 | Fe2O3 | CaO   | MnO  | Na2O | La2O3 | Ce2O3 | Nd2O3 | F    | Cl   | Sum    | -O=F,Cl | SubTotal | H2O calc | Total  |
|--------|-------|-------|------|-------|-------|------|------|-------|-------|-------|------|------|--------|---------|----------|----------|--------|
| LCM-1  | 1     | 41.12 | 0.55 | 0.25  | 52.51 | 0.46 | 0.19 | 0.34  | 0.86  | 0.60  | 1.96 | 0.72 | 99.55  | 0.99    | 98.56    | 0.64     | 99.20  |
| LCM-1  | 1     | 41.06 | 0.56 | 0.38  | 52.41 | 0.49 | 0.14 | 0.38  | 0.92  | 0.57  | 1.98 | 0.69 | 99.58  | 0.99    | 98.60    | 0.63     | 99.23  |
| LCM-1  | 1     | 40.87 | 0.55 | 0.34  | 52.40 | 0.45 | 0.19 | 0.40  | 0.94  | 0.53  | 1.93 | 0.71 | 99.32  | 0.97    | 98.34    | 0.65     | 98.99  |
| LCM-1  | 2     | 41.67 | 0.31 | 0.31  | 52.81 | 0.46 | 0.19 | 0.22  | 0.60  | 0.43  | 1.98 | 0.72 | 99.68  | 0.99    | 98.68    | 0.63     | 99.31  |
| LCM-1  | 2     | 41.37 | 0.28 | 0.26  | 52.70 | 0.45 | 0.21 | 0.22  | 0.59  | 0.55  | 2.12 | 0.68 | 99.44  | 1.05    | 98.39    | 0.57     | 98.96  |
| LCM-1  | 2     | 41.54 | 0.55 | 0.23  | 52.26 | 0.45 | 0.19 | 0.31  | 0.87  | 0.54  | 2.04 | 0.68 | 99.65  | 1.01    | 98.64    | 0.61     | 99.25  |
| LCM-1  | 3     | 41.28 | 0.28 | 0.20  | 52.85 | 0.46 | 0.20 | 0.25  | 0.55  | 0.44  | 2.05 | 0.72 | 99.27  | 1.02    | 98.25    | 0.59     | 98.84  |
| LCM-1  | 3     | 41.56 | 0.25 | 0.15  | 52.72 | 0.46 | 0.16 | 0.26  | 0.62  | 0.37  | 1.99 | 0.67 | 99.22  | 0.99    | 98.23    | 0.63     | 98.86  |
| LCM-1  | 4     | 41.60 | 0.29 | 0.34  | 53.78 | 0.06 | 0.12 | 0.12  | 0.23  | 0.08  | 1.79 | 0.37 | 98.78  | 0.84    | 97.95    | 0.81     | 98.76  |
| LCM-1  | 4     | 41.95 | 0.26 | 0.33  | 53.84 | 0.08 | 0.08 | 0.07  | 0.27  | 0.13  | 1.67 | 0.36 | 99.02  | 0.78    | 98.24    | 0.88     | 99.12  |
| LCM-1  | 4     | 41.86 | 0.20 | 0.41  | 53.81 | 0.06 | 0.14 | 0.04  | 0.18  | 0.10  | 1.82 | 0.38 | 98.98  | 0.85    | 98.13    | 0.80     | 98.93  |
| LCM-1  | 5     | 41.51 | 0.45 | 0.11  | 52.72 | 0.43 | 0.18 | 0.22  | 0.67  | 0.49  | 2.02 | 0.68 | 99.48  | 1.00    | 98.48    | 0.62     | 99.10  |
| LCM-1  | 5     | 41.34 | 0.37 | 0.19  | 52.80 | 0.46 | 0.20 | 0.27  | 0.63  | 0.45  | 2.01 | 0.68 | 99.40  | 1.00    | 98.40    | 0.62     | 99.02  |
| LCM-1  | 5     | 41.67 | 0.27 | 0.17  | 52.79 | 0.47 | 0.17 | 0.18  | 0.55  | 0.39  | 2.14 | 0.63 | 99.42  | 1.04    | 98.38    | 0.57     | 98.95  |
| LCM-1  | 6     | 41.77 | 0.35 | 0.18  | 52.69 | 0.43 | 0.19 | 0.27  | 0.62  | 0.48  | 1.90 | 0.67 | 99.54  | 0.95    | 98.59    | 0.68     | 99.27  |
| LCM-1  | 6     | 41.63 | 0.32 | 0.09  | 52.70 | 0.48 | 0.19 | 0.27  | 0.69  | 0.49  | 1.92 | 0.67 | 99.45  | 0.96    | 98.49    | 0.67     | 99.16  |
| LCM-1  | 6     | 41.29 | 0.31 | 0.15  | 52.81 | 0.46 | 0.21 | 0.24  | 0.66  | 0.50  | 1.87 | 0.68 | 99.18  | 0.94    | 98.24    | 0.69     | 98.93  |
| LCM-1  | 7     | 41.77 | 0.33 | 0.24  | 53.55 | 0.17 | 0.18 | 0.25  | 0.42  | 0.26  | 2.53 | 0.77 | 100.45 | 1.24    | 99.21    | 0.37     | 99.58  |
| LCM-1  | 7     | 41.80 | 0.36 | 0.22  | 53.39 | 0.17 | 0.16 | 0.28  | 0.63  | 0.34  | 2.84 | 0.62 | 100.81 | 1.34    | 99.47    | 0.26     | 99.73  |
| LCM-1  | 7     | 41.46 | 0.35 | 0.11  | 53.50 | 0.17 | 0.17 | 0.22  | 0.56  | 0.27  | 2.50 | 0.86 | 100.16 | 1.25    | 98.92    | 0.35     | 99.27  |
| LCM-1  | 8     | 41.58 | 0.30 | 0.15  | 52.87 | 0.42 | 0.17 | 0.18  | 0.57  | 0.37  | 2.09 | 0.69 | 99.38  | 1.04    | 98.35    | 0.58     | 98.93  |
| LCM-1  | 8     | 41.55 | 0.42 | 0.14  | 52.83 | 0.47 | 0.20 | 0.27  | 0.70  | 0.45  | 1.96 | 0.68 | 99.67  | 0.98    | 98.69    | 0.65     | 99.34  |
| LCM-1  | 8     | 41.46 | 0.35 | 0.19  | 52.96 | 0.46 | 0.16 | 0.26  | 0.60  | 0.37  | 2.05 | 0.66 | 99.51  | 1.01    | 98.50    | 0.61     | 99.11  |
| LCM-1  | 9     | 41.62 | 0.29 | 0.48  | 53.99 | 0.07 | 0.13 | 0.04  | 0.07  | 0.06  | 1.74 | 0.37 | 98.86  | 0.82    | 98.04    | 0.84     | 98.88  |
| LCM-1  | 9     | 41.39 | 0.33 | 0.37  | 54.06 | 0.09 | 0.18 | 0.03  | 0.07  | 0.07  | 1.83 | 0.36 | 98.77  | 0.85    | 97.92    | 0.80     | 98.72  |
| LCM-1  | 9     | 41.87 | 0.18 | 0.32  | 53.88 | 0.12 | 0.14 | 0.06  | 0.06  | 0.07  | 1.65 | 0.36 | 98.68  | 0.78    | 97.91    | 0.89     | 98.80  |
| LCM-1  | 10    | 40.70 | 0.58 | 0.30  | 52.26 | 0.47 | 0.14 | 0.41  | 0.89  | 0.58  | 1.89 | 0.67 | 98.90  | 0.95    | 97.95    | 0.67     | 98.62  |
| LCM-1  | 10    | 42.03 | 0.03 | 0.34  | 53.52 | 0.46 | 0.16 | 0.16  | 0.44  | 0.21  | 2.04 | 0.68 | 100.07 | 1.01    | 99.06    | 0.63     | 99.69  |
| LCM-1  | 10    | 42.02 | 0.20 | 0.17  | 53.07 | 0.48 | 0.16 | 0.26  | 0.51  | 0.37  | 2.10 | 0.69 | 100.04 | 1.04    | 99.00    | 0.59     | 99.59  |
| LCM-1  | 11    | 41.07 | 0.18 | 0.48  | 53.81 | 0.10 | 0.13 | 0.10  | 0.23  | 0.13  | 1.71 | 0.50 | 98.42  | 0.83    | 97.59    | 0.81     | 98.40  |
| LCM-1  | 11    | 41.07 | 0.21 | 0.53  | 53.76 | 0.08 | 0.14 | 0.12  | 0.27  | 0.18  | 1.54 | 0.48 | 98.37  | 0.76    | 97.61    | 0.90     | 98.51  |
| LCM-1  | 11    | 41.77 | 0.16 | 0.67  | 53.51 | 0.10 | 0.12 | 0.12  | 0.22  | 0.21  | 1.42 | 0.49 | 98.79  | 0.71    | 98.08    | 0.96     | 99.04  |
| LCM-1  | 12    | 41.62 | 0.36 | 0.30  | 53.00 | 0.45 | 0.20 | 0.22  | 0.66  | 0.40  | 2.09 | 0.69 | 99.98  | 1.03    | 98.95    | 0.59     | 99.54  |
| LCM-1  | 12    | 41.82 | 0.29 | 0.15  | 52.92 | 0.44 | 0.17 | 0.20  | 0.60  | 0.39  | 1.97 | 0.67 | 99.61  | 0.98    | 98.63    | 0.65     | 99.28  |
| LCM-1  | 12    | 41.63 | 0.33 | 0.17  | 52.84 | 0.45 | 0.20 | 0.24  | 0.68  | 0.38  | 2.00 | 0.68 | 99.58  | 0.99    | 98.59    | 0.63     | 99.22  |
| LCM-1  | 13    | 41.16 | 0.16 | 0.30  | 53.02 | 0.46 | 0.25 | 0.28  | 0.56  | 0.31  | 1.98 | 0.69 | 99.16  | 0.99    | 98.17    | 0.63     | 98.80  |
| LCM-1  | 13    | 41.91 | 0.25 | 0.36  | 53.04 | 0.44 | 0.23 | 0.23  | 0.58  | 0.34  | 2.08 | 0.68 | 100.14 | 1.03    | 99.11    | 0.60     | 99.71  |
| LCM-1  | 13    | 41.57 | 0.29 | 0.21  | 52.98 | 0.44 | 0.22 | 0.21  | 0.55  | 0.35  | 1.95 | 0.68 | 99.43  | 0.97    | 98.46    | 0.66     | 99.12  |
| LCM-1  | 14    | 42.09 | 0.18 | 0.22  | 53.66 | 0.03 | 0.09 | 0.22  | 0.52  | 0.30  | 3.21 | 0.43 | 100.93 | 1.45    | 99.48    | 0.13     | 99.61  |
| LCM-1  | 14    | 41.83 | 0.23 | 0.32  | 53.82 | 0.04 | 0.10 | 0.21  | 0.47  | 0.27  | 3.47 | 0.38 | 101.15 | 1.54    | 99.61    | 0.02     | 99.63  |
| LCM-1  | 14    | 42.49 | 0.17 | 0.24  | 53.83 | 0.05 | 0.09 | 0.25  | 0.52  | 0.28  | 3.41 | 0.37 | 101.69 | 1.52    | 100.17   | 0.06     | 100.23 |
| LCM-1  | 15    | 41.93 | 0.20 | 0.31  | 54.10 | 0.15 | 0.11 | 0.16  | 0.25  | 0.12  | 3.01 | 0.91 | 101.24 | 1.47    | 99.76    | 0.11     | 99.87  |
| LCM-1  | 15    | 41.74 | 0.25 | 0.32  | 53.95 | 0.15 | 0.12 | 0.09  | 0.23  | 0.11  | 2.92 | 1.28 | 101.16 | 1.52    | 99.64    | 0.06     | 99.70  |
| LCM-1  | 15    | 41.81 | 0.25 | 0.29  | 54.19 | 0.14 | 0.14 | 0.11  | 0.28  | 0.15  | 3.09 | 0.79 | 101.22 | 1.48    | 99.74    | 0.10     | 99.84  |
| LCM-6  | 10a   | 40.91 | 0.26 | 0.24  | 53.40 | 0.16 | 0.22 | 0.21  | 0.58  | 0.33  | 2.14 | 0.56 | 99.00  | 1.03    | 97.98    | 0.59     | 98.57  |
| LCM-6  | 10b   | 41.67 | 0.27 | 0.19  | 53.29 | 0.20 | 0.19 | 0.20  | 0.48  | 0.30  | 2.14 | 0.66 | 99.58  | 1.05    | 98.53    | 0.57     | 99.10  |
| LCM-6  | 1a    | 40.56 | 0.29 | 0.38  | 54.16 | 0.10 | 0.15 | 0.13  | 0.22  | 0.18  | 3.45 | 0.09 | 99.70  | 1.47    | 98.23    | 0.09     | 98.32  |
| LCM-6  | 2a    | 41.42 | 0.26 | 0.21  | 53.48 | 0.18 | 0.13 | 0.17  | 0.44  | 0.32  | 2.04 | 0.69 | 99.35  | 1.02    | 98.34    | 0.61     | 98.95  |
| LCM-6  | 2b    | 41.86 | 0.28 | 0.26  | 53.56 | 0.20 | 0.13 | 0.20  | 0.44  | 0.30  | 2.02 | 0.68 | 99.93  | 1.00    | 98.93    | 0.63     | 99.56  |
| LCM-6  | 3a    | 41.34 | 0.21 | 0.22  | 54.07 | 0.10 | 0.07 | 0.06  | 0.24  | 0.16  | 2.24 | 0.60 | 99.31  | 1.08    | 98.23    | 0.54     | 98.77  |
| LCM-6  | 3b    | 40.76 | 0.19 | 0.28  | 54.12 | 0.09 | 0.06 | 0.11  | 0.21  | 0.12  | 2.22 | 0.56 | 98.72  | 1.06    | 97.65    | 0.55     | 98.20  |
| LCM-6  | 4a    | 41.82 | 0.24 | 0.36  | 53.97 | 0.05 | 0.15 | 0.02  | 0.08  | 0.10  | 2.17 | 0.32 | 99.27  | 0.98    | 98.28    | 0.66     | 98.94  |
| LCM-6  | 4b    | 41.43 | 0.27 | 0.18  | 54.04 | 0.07 | 0.14 | 0.07  | 0.07  | 0.14  | 2.04 | 0.34 | 98.79  | 0.94    | 97.85    | 0.70     | 98.55  |
| LCM-6  | 8a    | 41.46 | 0.33 | 0.29  | 53.16 | 0.19 | 0.17 | 0.15  | 0.54  | 0.27  | 2.05 | 0.74 | 99.35  | 1.03    | 98.32    | 0.59     | 98.91  |
| LCM-6  | 8b    | 41.28 | 0.37 | 0.25  | 53.24 | 0.20 | 0.18 | 0.21  | 0.51  | 0.29  | 2.00 | 0.71 | 99.23  | 1.00    | 98.23    | 0.62     | 98.85  |
| LCM-6  | 9a    | 41.09 | 0.31 | 0.21  | 53.70 | 0.19 | 0.14 | 0.15  | 0.47  | 0.27  | 2.04 | 0.67 | 99.22  | 1.01    | 98.21    | 0.62     | 98.83  |
| LCM-6  | 9b    | 41.17 | 0.33 | 0.21  | 53.57 | 0.18 | 0.16 | 0.14  | 0.37  | 0.20  | 2.06 | 0.66 | 99.04  | 1.02    | 98.03    | 0.61     | 98.64  |
| LCM-9  | 2     | 41.77 | 0.32 | 0.31  | 54.19 | 0.10 | 0.11 | 0.10  | 0.07  | 0.15  | 2.10 | 0.29 | 99.50  | 0.95    | 98.55    | 0.70     | 99.25  |
| LCM-9  | 2     | 41.14 | 0.31 | 0.33  | 54.21 | 0.09 | 0.10 | 0.11  | 0.12  | 0.19  | 2.11 | 0.28 | 98.98  | 0.95    | 98.03    | 0.69     | 98.72  |
| LCM-9  | 2     | 41.96 | 0.25 | 0.27  | 54.19 | 0.08 | 0.15 | 0.03  | 0.11  | 0.07  | 2.17 | 0.26 | 99.52  | 0.97    | 98.55    | 0.68     | 99.23  |
| LCM-9  | 4     | 41.31 | 0.41 | 0.45  | 54.17 | 0.11 | 0.03 | 0.17  | 0.44  | 0.29  | 2.58 | 0.22 | 100.16 | 1.14    | 99.03    | 0.49     | 99.52  |
| LCM-9  | 4     | 42.30 | 0.23 | 0.32  | 54.64 | 0.10 | 0.02 | 0.11  | 0.22  | 0.19  | 2.53 | 0.25 | 100.90 | 1.12    | 99.78    | 0.52     | 100.30 |
| LCM-9  | 4     | 41.66 | 0.28 | 0.34  | 54.61 | 0.07 | 0.03 | 0.09  | 0.37  | 0.28  | 2.53 | 0.22 | 100.48 | 1.11    | 99.36    | 0.52     | 99.88  |
| LCM-9  | 7     | 41.91 | 0.16 | 0.40  | 54.75 | 0.06 | 0.06 | 0.00  | 0.18  | 0.21  | 2.40 | 0.42 | 100.54 | 1.10    | 99.43    | 0.53     | 99.96  |
| LCM-9  | 7     | 41.96 | 0.13 | 0.23  | 54.71 | 0.09 | 0.05 | 0.05  | 0.16  | 0.18  | 2.32 | 0.40 | 100.29 | 1.07    | 99.22    | 0.57     | 99.79  |
| LCM-9  | 7     | 41.88 | 0.12 | 0.33  | 54.82 | 0.09 | 0.03 | 0.04  | 0.17  | 0.16  | 2.39 | 0.42 | 100.45 | 1.10    | 99.35    | 0.54     | 99.89  |
| LCM-9  | 8     | 41.44 | 0.25 | 0.43  | 54.35 | 0.04 | 0.15 | 0.00  | 0.07  | 0.10  | 2.04 | 0.25 | 99.12  | 0.92    | 98.21    | 0.74     | 98.95  |
| LCM-9  | 8     | 41.65 | 0.28 | 0.30  | 54.47 | 0.04 | 0.13 | 0.01  | 0.03  | 0.00  | 1.90 | 0.23 | 99.05  | 0.85    | 98.19    | 0.81     | 99.00  |
| LCM-9  | 8     | 41.90 | 0.28 | 0.32  | 54.45 | 0.06 | 0.15 | 0.02  | 0.00  | 0.05  | 1.96 | 0.22 | 99.39  | 0.87    | 98.52    | 0.79     | 99.31  |
| LCM-9  | 9     | 41.62 | 0.32 | 0.39  | 54.56 | 0.07 | 0.05 | 0.14  | 0.35  | 0.27  | 2.71 | 0.20 | 100.67 | 1.19    | 99.48    | 0.44     | 99.92  |
| LCM-9  | 9     | 41.63 | 0.27 | 0.29  | 54.55 | 0.08 | 0.05 | 0.13  | 0.34  | 0.23  | 2.65 | 0.20 | 100.42 | 1.16    | 99.25    | 0.46     | 99.71  |
| LCM-9  | 9     | 41.59 | 0.31 | 0.32  | 53.96 | 0.07 | 0.07 | 0.13  | 0.38  | 0.29  | 2.79 | 0.2  |        |         |          |          |        |

|        |     |       |      |      |       |      |      |      |      |      |      |      |        |      |       |      |        |
|--------|-----|-------|------|------|-------|------|------|------|------|------|------|------|--------|------|-------|------|--------|
| LCM-9  | 15  | 41.76 | 0.25 | 0.50 | 54.34 | 0.09 | 0.11 | 0.01 | 0.01 | 0.02 | 1.99 | 0.24 | 99.31  | 0.89 | 98.42 | 0.77 | 99.19  |
| LCM-9  | 15  | 41.12 | 0.22 | 0.42 | 53.97 | 0.10 | 0.11 | 0.09 | 0.03 | 0.10 | 1.92 | 0.26 | 98.37  | 0.87 | 97.50 | 0.77 | 98.27  |
| LCM-13 | 1   | 40.50 | 0.60 | 0.10 | 52.40 | 0.40 | 0.24 | 0.41 | 0.97 | 0.50 | 2.58 | 0.43 | 99.12  | 1.18 | 97.94 | 0.40 | 98.34  |
| LCM-13 | 1   | 41.06 | 0.44 | 0.21 | 52.55 | 0.39 | 0.24 | 0.39 | 0.91 | 0.57 | 2.35 | 0.45 | 99.56  | 1.09 | 98.47 | 0.52 | 98.99  |
| LCM-13 | 1   | 40.78 | 0.68 | 0.19 | 51.75 | 0.41 | 0.23 | 0.48 | 1.05 | 0.62 | 2.68 | 0.44 | 99.30  | 1.23 | 98.07 | 0.35 | 98.42  |
| LCM-13 | 2   | 40.00 | 2.66 | 0.13 | 50.99 | 0.29 | 0.26 | 0.36 | 0.75 | 0.57 | 2.22 | 0.46 | 98.69  | 1.04 | 97.65 | 0.56 | 98.21  |
| LCM-13 | 3   | 40.62 | 0.48 | 0.14 | 52.59 | 0.39 | 0.24 | 0.36 | 0.85 | 0.56 | 2.29 | 0.43 | 98.93  | 1.06 | 97.87 | 0.55 | 98.42  |
| LCM-13 | 3   | 40.88 | 0.49 | 0.14 | 52.52 | 0.41 | 0.21 | 0.34 | 0.85 | 0.58 | 2.30 | 0.41 | 99.12  | 1.06 | 98.06 | 0.55 | 98.61  |
| LCM-13 | 3   | 40.98 | 0.29 | 0.07 | 53.26 | 0.34 | 0.25 | 0.30 | 0.64 | 0.44 | 2.34 | 0.44 | 99.35  | 1.08 | 98.27 | 0.53 | 98.80  |
| LCM-13 | 4   | 40.20 | 0.87 | 0.18 | 52.10 | 0.35 | 0.19 | 0.51 | 1.09 | 0.72 | 2.45 | 0.44 | 99.10  | 1.13 | 97.97 | 0.46 | 98.43  |
| LCM-13 | 4   | 40.47 | 0.80 | 0.24 | 52.08 | 0.41 | 0.21 | 0.45 | 1.12 | 0.80 | 2.39 | 0.44 | 99.40  | 1.11 | 98.30 | 0.49 | 98.79  |
| LCM-13 | 4   | 40.49 | 0.73 | 0.13 | 52.17 | 0.38 | 0.16 | 0.39 | 1.05 | 0.66 | 2.48 | 0.48 | 99.11  | 1.15 | 97.96 | 0.44 | 98.40  |
| LCM-13 | 5   | 41.28 | 0.20 | 0.23 | 53.32 | 0.37 | 0.28 | 0.23 | 0.56 | 0.36 | 2.41 | 0.39 | 99.61  | 1.10 | 98.51 | 0.52 | 99.03  |
| LCM-13 | 5   | 40.99 | 0.25 | 0.10 | 53.08 | 0.36 | 0.32 | 0.30 | 0.67 | 0.45 | 2.48 | 0.43 | 99.45  | 1.14 | 98.31 | 0.46 | 98.77  |
| LCM-13 | 5   | 41.03 | 0.52 | 0.29 | 52.62 | 0.39 | 0.23 | 0.36 | 0.86 | 0.57 | 2.49 | 0.43 | 99.78  | 1.15 | 98.64 | 0.46 | 99.10  |
| LCM-13 | 6   | 40.55 | 0.43 | 0.23 | 53.39 | 0.20 | 0.26 | 0.24 | 0.50 | 0.31 | 2.18 | 0.33 | 98.63  | 0.99 | 97.63 | 0.63 | 98.26  |
| LCM-13 | 6   | 41.07 | 0.45 | 0.17 | 53.18 | 0.23 | 0.25 | 0.22 | 0.56 | 0.42 | 2.29 | 0.33 | 99.18  | 1.04 | 98.14 | 0.58 | 98.72  |
| LCM-13 | 6   | 40.55 | 0.62 | 0.21 | 52.91 | 0.23 | 0.25 | 0.28 | 0.66 | 0.47 | 2.23 | 0.32 | 98.71  | 1.01 | 97.70 | 0.60 | 98.30  |
| LCM-13 | 7   | 41.27 | 0.33 | 0.12 | 52.90 | 0.39 | 0.25 | 0.27 | 0.71 | 0.43 | 2.35 | 0.43 | 99.45  | 1.09 | 98.37 | 0.52 | 98.89  |
| LCM-13 | 7   | 41.36 | 0.28 | 0.13 | 53.26 | 0.38 | 0.26 | 0.28 | 0.58 | 0.33 | 2.35 | 0.43 | 99.64  | 1.09 | 98.56 | 0.53 | 99.09  |
| LCM-13 | 8   | 40.61 | 0.73 | 0.09 | 52.25 | 0.37 | 0.18 | 0.48 | 1.05 | 0.76 | 2.48 | 0.42 | 99.43  | 1.14 | 98.29 | 0.45 | 98.74  |
| LCM-13 | 8   | 40.16 | 0.77 | 0.18 | 52.11 | 0.38 | 0.20 | 0.42 | 1.09 | 0.67 | 2.38 | 0.43 | 98.79  | 1.10 | 97.69 | 0.49 | 98.18  |
| LCM-13 | 8   | 40.44 | 0.69 | 0.31 | 52.17 | 0.39 | 0.18 | 0.45 | 1.07 | 0.72 | 2.42 | 0.41 | 99.24  | 1.11 | 98.13 | 0.48 | 98.61  |
| LCM-13 | 9   | 40.89 | 0.39 | 0.34 | 53.45 | 0.21 | 0.15 | 0.22 | 0.61 | 0.38 | 2.78 | 0.49 | 99.90  | 1.28 | 98.62 | 0.31 | 98.93  |
| LCM-13 | 9   | 40.37 | 0.79 | 0.29 | 52.55 | 0.23 | 0.11 | 0.28 | 0.86 | 0.59 | 2.46 | 0.50 | 99.03  | 1.15 | 97.88 | 0.44 | 98.32  |
| LCM-13 | 9   | 41.35 | 0.46 | 0.18 | 53.21 | 0.21 | 0.15 | 0.24 | 0.65 | 0.43 | 2.53 | 0.49 | 99.91  | 1.18 | 98.74 | 0.43 | 99.17  |
| LCM-13 | 10  | 40.19 | 0.83 | 0.20 | 52.36 | 0.41 | 0.18 | 0.43 | 1.13 | 0.73 | 2.48 | 0.44 | 99.37  | 1.14 | 98.23 | 0.45 | 98.68  |
| LCM-13 | 10  | 40.18 | 0.73 | 0.14 | 52.35 | 0.39 | 0.18 | 0.41 | 1.16 | 0.76 | 2.48 | 0.40 | 99.17  | 1.13 | 98.04 | 0.46 | 98.50  |
| LCM-13 | 10  | 40.42 | 0.66 | 0.20 | 52.37 | 0.42 | 0.20 | 0.46 | 1.04 | 0.71 | 2.43 | 0.46 | 99.35  | 1.12 | 98.23 | 0.47 | 98.70  |
| LCM-13 | 11  | 40.61 | 0.61 | 0.31 | 52.41 | 0.38 | 0.19 | 0.44 | 0.98 | 0.65 | 2.40 | 0.44 | 99.42  | 1.11 | 98.31 | 0.49 | 98.80  |
| LCM-13 | 11  | 41.22 | 0.66 | 0.19 | 52.20 | 0.39 | 0.22 | 0.36 | 1.02 | 0.62 | 2.43 | 0.43 | 99.74  | 1.12 | 98.62 | 0.48 | 99.10  |
| LCM-13 | 11  | 40.00 | 1.51 | 0.21 | 51.84 | 0.38 | 0.26 | 0.34 | 0.93 | 0.54 | 2.37 | 0.40 | 98.78  | 1.09 | 97.70 | 0.51 | 98.21  |
| LCM-13 | 12  | 41.19 | 0.26 | 0.10 | 53.60 | 0.30 | 0.24 | 0.18 | 0.48 | 0.32 | 3.61 | 0.46 | 100.74 | 1.62 | 99.11 | 0.00 | 99.11  |
| LCM-13 | 12  | 40.81 | 0.35 | 0.14 | 53.40 | 0.30 | 0.20 | 0.21 | 0.51 | 0.40 | 3.49 | 0.43 | 100.24 | 1.57 | 98.67 | 0.00 | 98.66  |
| LCM-13 | 12  | 41.30 | 0.23 | 0.13 | 53.63 | 0.30 | 0.21 | 0.18 | 0.41 | 0.39 | 3.57 | 0.44 | 100.78 | 1.60 | 99.18 | 0.00 | 99.18  |
| LCM-13 | 13  | 40.87 | 0.68 | 0.24 | 52.31 | 0.39 | 0.19 | 0.37 | 0.92 | 0.59 | 2.37 | 0.43 | 99.36  | 1.09 | 98.27 | 0.51 | 98.78  |
| LCM-13 | 13  | 40.64 | 0.70 | 0.32 | 52.47 | 0.37 | 0.20 | 0.40 | 1.00 | 0.66 | 2.43 | 0.40 | 99.59  | 1.11 | 98.48 | 0.49 | 98.97  |
| LCM-13 | 13  | 40.41 | 0.70 | 0.26 | 52.31 | 0.42 | 0.17 | 0.43 | 1.03 | 0.75 | 2.40 | 0.45 | 99.33  | 1.11 | 98.22 | 0.48 | 98.70  |
| LCM-13 | 14  | 40.80 | 0.51 | 0.22 | 52.93 | 0.42 | 0.20 | 0.28 | 0.77 | 0.60 | 2.59 | 0.43 | 99.75  | 1.19 | 98.56 | 0.41 | 98.97  |
| LCM-13 | 14  | 40.96 | 0.35 | 0.11 | 53.32 | 0.35 | 0.26 | 0.33 | 0.69 | 0.40 | 2.57 | 0.45 | 99.80  | 1.18 | 98.62 | 0.42 | 99.04  |
| LCM-13 | 14  | 40.67 | 0.39 | 0.24 | 53.07 | 0.35 | 0.24 | 0.28 | 0.67 | 0.40 | 2.53 | 0.45 | 99.29  | 1.17 | 98.12 | 0.43 | 98.55  |
| LCM-13 | 15  | 40.93 | 0.49 | 0.23 | 53.50 | 0.15 | 0.13 | 0.23 | 0.61 | 0.42 | 2.64 | 0.48 | 99.80  | 1.22 | 98.59 | 0.38 | 98.97  |
| LCM-13 | 15  | 41.02 | 0.48 | 0.25 | 53.46 | 0.15 | 0.17 | 0.21 | 0.60 | 0.39 | 2.77 | 0.45 | 99.95  | 1.27 | 98.68 | 0.33 | 99.01  |
| LCM-13 | 15  | 40.85 | 0.48 | 0.25 | 53.37 | 0.20 | 0.13 | 0.25 | 0.58 | 0.33 | 2.62 | 0.42 | 99.48  | 1.20 | 98.28 | 0.40 | 98.68  |
| LCM-14 | 10a | 41.57 | 0.12 | 0.38 | 54.06 | 0.15 | 0.08 | 0.01 | 0.37 | 0.12 | 1.78 | 0.76 | 99.40  | 0.92 | 98.48 | 0.72 | 99.20  |
| LCM-14 | 10b | 42.17 | 0.11 | 0.37 | 53.97 | 0.18 | 0.09 | 0.13 | 0.16 | 0.10 | 1.92 | 0.73 | 99.94  | 0.97 | 98.96 | 0.67 | 99.63  |
| LCM-14 | 10c | 41.68 | 0.16 | 0.36 | 53.91 | 0.15 | 0.10 | 0.15 | 0.22 | 0.09 | 1.80 | 0.72 | 99.35  | 0.92 | 98.43 | 0.72 | 99.15  |
| LCM-14 | 1b  | 41.88 | 0.12 | 0.33 | 53.38 | 0.22 | 0.07 | 0.05 | 0.21 | 0.15 | 1.94 | 0.74 | 99.08  | 0.98 | 98.10 | 0.65 | 98.75  |
| LCM-14 | 1c  | 42.07 | 0.14 | 0.33 | 53.71 | 0.20 | 0.07 | 0.12 | 0.22 | 0.16 | 1.81 | 0.77 | 99.58  | 0.94 | 98.65 | 0.71 | 99.36  |
| LCM-14 | 2a  | 41.46 | 0.21 | 0.36 | 53.61 | 0.24 | 0.16 | 0.13 | 0.43 | 0.14 | 2.18 | 0.69 | 99.61  | 1.07 | 98.54 | 0.55 | 99.09  |
| LCM-14 | 2b  | 42.20 | 0.21 | 0.39 | 52.90 | 0.26 | 0.17 | 0.15 | 0.44 | 0.27 | 2.12 | 0.73 | 99.83  | 1.06 | 98.77 | 0.56 | 99.33  |
| LCM-14 | 3a  | 41.91 | 0.19 | 0.33 | 53.66 | 0.22 | 0.10 | 0.24 | 0.44 | 0.12 | 2.18 | 0.73 | 100.12 | 1.08 | 99.04 | 0.55 | 99.59  |
| LCM-14 | 3b  | 41.61 | 0.27 | 0.39 | 53.58 | 0.25 | 0.12 | 0.21 | 0.37 | 0.18 | 1.96 | 0.77 | 99.69  | 1.00 | 98.70 | 0.64 | 99.34  |
| LCM-14 | 4a  | 41.22 | 0.14 | 0.33 | 52.84 | 0.25 | 0.10 | 0.18 | 0.36 | 0.23 | 1.93 | 0.80 | 98.37  | 0.99 | 97.38 | 0.62 | 98.00  |
| LCM-14 | 4b  | 41.67 | 0.10 | 0.35 | 53.67 | 0.22 | 0.07 | 0.13 | 0.24 | 0.15 | 2.05 | 0.78 | 99.43  | 1.04 | 98.39 | 0.58 | 98.97  |
| LCM-14 | 4c  | 40.93 | 0.14 | 0.37 | 53.35 | 0.30 | 0.10 | 0.14 | 0.37 | 0.11 | 2.07 | 0.76 | 98.65  | 1.05 | 97.61 | 0.56 | 98.17  |
| LCM-14 | 5a  | 42.09 | 0.15 | 0.45 | 53.63 | 0.10 | 0.08 | 0.20 | 0.20 | 0.07 | 2.20 | 0.50 | 99.68  | 1.04 | 98.64 | 0.59 | 99.23  |
| LCM-14 | 5b  | 42.11 | 0.14 | 0.39 | 53.83 | 0.11 | 0.08 | 0.12 | 0.31 | 0.10 | 1.97 | 0.48 | 99.62  | 0.94 | 98.68 | 0.71 | 99.39  |
| LCM-14 | 5c  | 41.61 | 0.15 | 0.42 | 54.14 | 0.13 | 0.03 | 0.02 | 0.36 | 0.18 | 2.12 | 0.47 | 99.63  | 1.00 | 98.63 | 0.64 | 99.27  |
| LCM-14 | 6a  | 41.72 | 0.32 | 0.42 | 53.37 | 0.21 | 0.08 | 0.37 | 0.50 | 0.21 | 2.06 | 0.70 | 99.94  | 1.02 | 98.92 | 0.60 | 99.52  |
| LCM-14 | 6b  | 40.63 | 0.32 | 0.43 | 53.46 | 0.21 | 0.11 | 0.28 | 0.46 | 0.28 | 2.20 | 0.81 | 99.19  | 1.11 | 98.09 | 0.50 | 98.59  |
| LCM-14 | 8a  | 41.50 | 0.32 | 0.39 | 53.72 | 0.24 | 0.08 | 0.32 | 0.62 | 0.20 | 1.82 | 0.74 | 99.95  | 0.93 | 99.02 | 0.71 | 99.73  |
| LCM-14 | 8b  | 41.21 | 0.19 | 0.35 | 53.21 | 0.23 | 0.07 | 0.18 | 0.43 | 0.11 | 1.84 | 0.73 | 98.55  | 0.94 | 97.61 | 0.68 | 98.29  |
| LCM-14 | 9a  | 40.98 | 0.13 | 0.47 | 53.93 | 0.08 | 0.09 | 0.04 | 0.24 | 0.13 | 1.86 | 0.37 | 98.32  | 0.87 | 97.45 | 0.77 | 98.22  |
| LCM-14 | 9b  | 41.66 | 0.21 | 0.55 | 54.19 | 0.10 | 0.11 | 0.10 | 0.08 | 0.07 | 2.08 | 0.43 | 99.57  | 0.97 | 98.60 | 0.67 | 99.27  |
| LCM-16 | 10a | 41.04 | 0.48 | 0.40 | 53.32 | 0.24 | 0.13 | 0.25 | 0.62 | 0.24 | 4.06 | 0.40 | 101.17 | 1.80 | 99.37 | 0.00 | 99.37  |
| LCM-16 | 10b | 41.34 | 0.53 | 0.41 | 53.23 | 0.29 | 0.11 | 0.26 | 0.58 | 0.45 | 4.20 | 0.37 | 101.78 | 1.85 | 99.93 | 0.00 | 99.93  |
| LCM-16 | 11a | 41.78 | 0.29 | 0.63 | 54.33 | 0.13 | 0.15 | 0.13 | 0.24 | 0.13 | 2.35 | 0.32 | 100.49 | 1.06 | 99.43 | 0.58 | 100.01 |
| LCM-16 | 11b | 41.16 | 0.29 | 0.57 | 54.37 | 0.14 | 0.13 | 0.05 | 0.27 | 0.04 | 2.24 | 0.33 | 99.60  | 1.02 | 98.58 | 0.62 | 99.20  |
| LCM-16 | 12a | 41.43 | 0.29 | 0.63 | 54.01 | 0.03 | 0.15 | 0.12 | 0.19 | 0.14 | 2.75 | 0.47 | 100.22 | 1.27 | 98.95 | 0.34 | 99.29  |
| LCM-16 | 12b | 41.30 | 0.28 | 0.66 | 54.03 | 0.09 | 0.20 | 0.05 | 0.28 | 0.19 | 2.90 | 0.46 | 100.43 | 1.32 | 99.11 | 0.28 | 99.39  |
| LCM-16 | 13a | 41.42 | 0.29 | 0.35 | 54.05 | 0.20 | 0.15 | 0.14 | 0.32 | 0.21 | 2.16 | 0.67 | 99.95  | 1.06 | 98.89 | 0.57 | 99.46  |
| LCM-16 | 13b | 40.81 | 0.27 | 0.34 |       |      |      |      |      |      |      |      |        |      |       |      |        |

|        |     |       |      |      |       |      |      |      |      |      |      |      |        |      |         |      |        |
|--------|-----|-------|------|------|-------|------|------|------|------|------|------|------|--------|------|---------|------|--------|
| LCM-16 | 5b  | 41.33 | 0.24 | 0.73 | 54.38 | 0.04 | 0.15 | 0.05 | 0.04 | 0.03 | 2.01 | 0.28 | 99.28  | 0.91 | 98.37   | 0.74 | 99.11  |
| LCM-16 | 6a  | 40.73 | 0.26 | 0.79 | 53.82 | 0.06 | 0.12 | 0.05 | 0.06 | 0.01 | 1.98 | 0.26 | 98.15  | 0.89 | 97.25   | 0.74 | 97.99  |
| LCM-16 | 7a  | 41.82 | 0.22 | 0.71 | 54.56 | 0.02 | 0.16 | 0.00 | 0.00 | 0.04 | 2.30 | 0.23 | 100.07 | 1.02 | 99.05   | 0.63 | 99.68  |
| LCM-16 | 7b  | 41.72 | 0.26 | 0.59 | 54.37 | 0.03 | 0.16 | 0.00 | 0.12 | 0.00 | 2.31 | 0.27 | 99.86  | 1.03 | 98.82   | 0.61 | 99.43  |
| LCM-16 | 7c  | 41.46 | 0.24 | 0.67 | 54.22 | 0.03 | 0.13 | 0.06 | 0.05 | 0.00 | 2.31 | 0.26 | 99.43  | 1.03 | 98.40   | 0.61 | 99.01  |
| LCM-17 | 10a | 40.93 | 0.86 | 0.37 | 53.14 | 0.05 | 0.06 | 0.29 | 0.82 | 0.45 | 2.64 | 0.48 | 100.08 | 1.22 | 98.86   | 0.38 | 99.24  |
| LCM-17 | 10b | 40.83 | 0.71 | 0.42 | 53.50 | 0.08 | 0.09 | 0.22 | 0.69 | 0.30 | 2.71 | 0.46 | 100.00 | 1.24 | 98.75   | 0.35 | 99.10  |
| LCM-17 | 10c | 40.66 | 1.18 | 0.34 | 53.12 | 0.13 | 0.08 | 0.36 | 0.71 | 0.44 | 2.66 | 0.57 | 100.23 | 1.25 | 98.98   | 0.35 | 99.33  |
| LCM-17 | 1a  | 42.40 | 0.29 | 0.07 | 54.95 | 0.03 | 0.10 | 0.01 | 0.12 | 0.12 | 3.31 | 0.10 | 101.51 | 1.42 | 100.10  | 0.19 | 100.29 |
| LCM-17 | 1b  | 41.36 | 0.35 | 0.05 | 54.43 | 0.00 | 0.10 | 0.04 | 0.15 | 0.08 | 3.15 | 0.10 | 99.82  | 1.35 | 98.47   | 0.24 | 98.71  |
| LCM-17 | 1c  | 41.96 | 0.25 | 0.17 | 53.92 | 0.10 | 0.10 | 0.01 | 0.12 | 0.09 | 3.26 | 0.10 | 100.06 | 1.39 | 98.67   | 0.19 | 98.86  |
| LCM-17 | 2a  | 41.60 | 0.39 | 0.41 | 54.24 | 0.14 | 0.13 | 0.22 | 0.28 | 0.20 | 2.73 | 0.54 | 100.87 | 1.27 | 99.60   | 0.34 | 99.94  |
| LCM-17 | 2b  | 40.57 | 0.40 | 0.43 | 54.06 | 0.14 | 0.12 | 0.08 | 0.50 | 0.20 | 2.65 | 0.51 | 99.66  | 1.23 | 98.43   | 0.37 | 98.80  |
| LCM-17 | 2b  | 41.91 | 0.36 | 0.38 | 53.60 | 0.10 | 0.12 | 0.16 | 0.44 | 0.26 | 2.58 | 0.50 | 100.41 | 1.20 | 99.21   | 0.41 | 99.62  |
| LCM-17 | 3a  | 41.22 | 0.40 | 0.41 | 53.80 | 0.12 | 0.07 | 0.18 | 0.37 | 0.20 | 2.50 | 0.50 | 99.77  | 1.17 | 98.60   | 0.44 | 99.04  |
| LCM-17 | 3b  | 42.13 | 0.22 | 0.39 | 54.00 | 0.11 | 0.10 | 0.04 | 0.35 | 0.18 | 2.56 | 0.51 | 100.59 | 1.19 | 99.39   | 0.43 | 99.82  |
| LCM-17 | 4a  | 41.83 | 0.17 | 0.43 | 54.53 | 0.14 | 0.15 | 0.12 | 0.18 | 0.20 | 2.47 | 0.49 | 100.70 | 1.15 | 99.56   | 0.49 | 100.05 |
| LCM-17 | 4b  | 41.82 | 0.27 | 0.42 | 54.45 | 0.11 | 0.15 | 0.08 | 0.29 | 0.21 | 2.77 | 0.49 | 101.05 | 1.28 | 99.77   | 0.34 | 100.11 |
| LCM-17 | 5a  | 40.92 | 0.32 | 0.41 | 54.01 | 0.07 | 0.12 | 0.08 | 0.39 | 0.14 | 2.44 | 0.49 | 99.40  | 1.14 | 98.26   | 0.47 | 98.73  |
| LCM-17 | 5b  | 41.32 | 0.30 | 0.41 | 54.24 | 0.07 | 0.18 | 0.18 | 0.30 | 0.20 | 2.53 | 0.50 | 100.23 | 1.18 | 99.05   | 0.44 | 99.49  |
| LCM-17 | 6a  | 41.35 | 0.23 | 0.54 | 53.60 | 0.19 | 0.18 | 0.19 | 0.26 | 0.11 | 2.46 | 0.49 | 99.59  | 1.15 | 98.44   | 0.46 | 98.90  |
| LCM-17 | 6b  | 41.58 | 0.25 | 0.44 | 54.13 | 0.13 | 0.17 | 0.10 | 0.15 | 0.16 | 2.54 | 0.53 | 100.18 | 1.19 | 99.00   | 0.43 | 99.43  |
| LCM-17 | 6c  | 42.06 | 0.26 | 0.38 | 53.70 | 0.11 | 0.16 | 0.15 | 0.39 | 0.16 | 2.65 | 0.49 | 100.50 | 1.23 | 99.27   | 0.39 | 99.66  |
| LCM-17 | 7a  | 41.15 | 0.31 | 0.45 | 54.15 | 0.14 | 0.18 | 0.06 | 0.32 | 0.16 | 2.62 | 0.53 | 100.08 | 1.22 | 98.85   | 0.39 | 99.24  |
| LCM-17 | 7b  | 41.76 | 0.26 | 0.43 | 53.95 | 0.10 | 0.15 | 0.10 | 0.42 | 0.21 | 2.52 | 0.54 | 100.43 | 1.18 | 99.25   | 0.44 | 99.69  |
| LCM-17 | 8a  | 41.79 | 0.10 | 0.52 | 54.17 | 0.06 | 0.10 | 0.07 | 0.13 | 0.15 | 2.22 | 0.49 | 99.79  | 1.05 | 98.74   | 0.59 | 99.33  |
| LCM-17 | 8b  | 41.90 | 0.24 | 0.59 | 53.75 | 0.08 | 0.11 | 0.08 | 0.29 | 0.15 | 2.13 | 0.47 | 99.78  | 1.00 | 98.78   | 0.63 | 99.41  |
| LCM-17 | 8c  | 42.43 | 0.19 | 0.53 | 54.04 | 0.05 | 0.07 | 0.10 | 0.21 | 0.14 | 2.16 | 0.46 | 100.39 | 1.01 | 99.37   | 0.64 | 100.01 |
| LCM-17 | 9a  | 41.48 | 0.45 | 0.40 | 53.02 | 0.03 | 0.11 | 0.23 | 0.43 | 0.33 | 2.42 | 0.47 | 99.36  | 1.12 | 98.24   | 0.48 | 98.72  |
| LCM-17 | 9b  | 41.48 | 0.29 | 0.39 | 53.53 | 0.09 | 0.17 | 0.23 | 0.29 | 0.19 | 2.49 | 0.52 | 99.66  | 1.17 | 98.49   | 0.44 | 98.93  |
| LCM-18 | 10a | 41.25 | 0.36 | 0.55 | 53.96 | 0.15 | 0.17 | 0.09 | 0.29 | 0.13 | 1.85 | 0.92 | 99.73  | 0.99 | 98.74   | 0.65 | 99.39  |
| LCM-18 | 10b | 41.64 | 0.25 | 0.42 | 53.74 | 0.13 | 0.18 | 0.07 | 0.31 | 0.06 | 1.97 | 0.93 | 99.71  | 1.04 | 98.67   | 0.59 | 99.26  |
| LCM-18 | 10c | 41.69 | 0.28 | 0.53 | 54.10 | 0.14 | 0.15 | 0.16 | 0.28 | 0.14 | 1.84 | 0.99 | 100.29 | 1.00 | 99.29   | 0.65 | 99.94  |
| LCM-18 | 1a  | 41.28 | 0.30 | 0.54 | 54.10 | 0.06 | 0.02 | 0.10 | 0.42 | 0.18 | 2.35 | 0.30 | 99.66  | 1.05 | 98.60   | 0.57 | 99.17  |
| LCM-18 | 1b  | 41.54 | 0.28 | 0.47 | 54.50 | 0.02 | 0.04 | 0.15 | 0.27 | 0.25 | 2.12 | 0.36 | 99.99  | 0.97 | 99.02   | 0.68 | 99.70  |
| LCM-18 | 2a  | 42.24 | 0.18 | 0.35 | 54.54 | 0.06 | 0.09 | 0.14 | 0.22 | 0.11 | 2.74 | 0.43 | 101.10 | 1.25 | 99.85   | 0.37 | 100.22 |
| LCM-18 | 2b  | 42.20 | 0.17 | 0.40 | 54.19 | 0.02 | 0.09 | 0.05 | 0.20 | 0.12 | 2.92 | 0.48 | 100.86 | 1.34 | 99.52   | 0.27 | 99.79  |
| LCM-18 | 2c  | 42.02 | 0.17 | 0.41 | 54.41 | 0.05 | 0.09 | 0.09 | 0.20 | 0.08 | 2.64 | 0.48 | 100.65 | 1.22 | 99.43   | 0.40 | 99.83  |
| LCM-18 | 3a  | 41.53 | 0.33 | 0.43 | 53.66 | 0.22 | 0.04 | 0.24 | 0.56 | 0.27 | 2.77 | 0.42 | 100.45 | 1.26 | 99.20   | 0.34 | 99.54  |
| LCM-18 | 3b  | 41.45 | 0.23 | 0.31 | 53.80 | 0.13 | 0.07 | 0.25 | 0.44 | 0.16 | 2.81 | 0.44 | 100.07 | 1.28 | 98.79   | 0.31 | 99.10  |
| LCM-18 | 4a  | 42.25 | 0.13 | 0.47 | 53.80 | 0.09 | 0.04 | 0.04 | 0.10 | 0.08 | 2.63 | 0.35 | 99.97  | 1.19 | 98.79   | 0.43 | 99.22  |
| LCM-18 | 4b  | 42.59 | 0.17 | 0.44 | 54.33 | 0.06 | 0.02 | 0.05 | 0.20 | 0.05 | 2.68 | 0.35 | 100.94 | 1.21 | 99.73   | 0.42 | 100.15 |
| LCM-18 | 4c  | 41.62 | 0.16 | 0.50 | 54.13 | 0.06 | 0.02 | 0.17 | 0.23 | 0.15 | 2.60 | 0.30 | 99.93  | 1.16 | 98.77   | 0.45 | 99.22  |
| LCM-18 | 6a  | 41.74 | 0.27 | 0.48 | 54.32 | 0.09 | 0.04 | 0.15 | 0.38 | 0.11 | 3.09 | 0.43 | 101.09 | 1.40 | 99.69   | 0.20 | 99.89  |
| LCM-18 | 6b  | 42.21 | 0.26 | 0.41 | 54.10 | 0.08 | 0.04 | 0.23 | 0.26 | 0.18 | 3.37 | 0.25 | 101.38 | 1.47 | 99.91   | 0.11 | 100.02 |
| LCM-18 | 6c  | 42.01 | 0.24 | 0.49 | 54.13 | 0.08 | 0.05 | 0.16 | 0.42 | 0.27 | 2.84 | 0.37 | 101.05 | 1.28 | 99.77   | 0.33 | 100.10 |
| LCM-18 | 6d  | 42.23 | 0.26 | 0.44 | 53.60 | 0.04 | 0.05 | 0.00 | 0.40 | 0.20 | 3.01 | 0.33 | 100.57 | 1.34 | 99.23   | 0.25 | 99.48  |
| LCM-18 | 7a  | 42.20 | 0.27 | 0.48 | 54.34 | 0.07 | 0.08 | 0.08 | 0.21 | 0.14 | 2.72 | 0.49 | 101.08 | 1.26 | 99.83   | 0.36 | 100.19 |
| LCM-18 | 7b  | 41.77 | 0.33 | 0.44 | 54.40 | 0.06 | 0.06 | 0.15 | 0.35 | 0.31 | 2.82 | 0.44 | 101.13 | 1.29 | 99.85   | 0.33 | 100.18 |
| LCM-18 | 7c  | 41.98 | 0.34 | 0.47 | 53.73 | 0.06 | 0.07 | 0.18 | 0.37 | 0.31 | 2.66 | 0.49 | 100.65 | 1.23 | 99.42   | 0.38 | 99.80  |
| LCM-18 | 8a  | 42.11 | 0.30 | 0.31 | 54.35 | 0.17 | 0.06 | 0.14 | 0.51 | 0.31 | 2.63 | 0.38 | 101.27 | 1.20 | 100.07  | 0.43 | 100.50 |
| LCM-18 | 8b  | 41.99 | 0.35 | 0.31 | 54.36 | 0.15 | 0.04 | 0.15 | 0.38 | 0.37 | 2.60 | 0.42 | 101.11 | 1.19 | 99.92   | 0.44 | 100.36 |
| LCM-18 | 8c  | 41.93 | 0.25 | 0.24 | 54.44 | 0.12 | 0.05 | 0.19 | 0.38 | 0.30 | 2.67 | 0.38 | 100.95 | 1.21 | 99.74   | 0.41 | 100.15 |
| LCM-18 | 9a  | 42.44 | 0.13 | 0.61 | 54.39 | 0.12 | 0.01 | 0.04 | 0.19 | 0.07 | 1.67 | 0.50 | 100.17 | 0.82 | 99.35   | 0.86 | 100.21 |
| LCM-18 | 9b  | 42.50 | 0.11 | 0.64 | 54.65 | 0.11 | 0.01 | 0.08 | 0.13 | 0.01 | 1.80 | 0.47 | 100.51 | 0.86 | 99.65   | 0.81 | 100.46 |
| LCM-18 | 9c  | 42.25 | 0.15 | 0.82 | 54.11 | 0.06 | 0.02 | 0.00 | 0.13 | 0.20 | 1.83 | 0.48 | 100.05 | 0.88 | 99.17   | 0.79 | 99.96  |
| LCM-19 | 1a  | 41.75 | 0.16 | 0.45 | 54.09 | 0.04 | 0.06 | 0.09 | 0.21 | 0.09 | 2.42 | 0.43 | 99.77  | 1.12 | 98.66   | 0.50 | 99.16  |
| LCM-19 | 1b  | 42.24 | 0.28 | 0.56 | 53.76 | 0.09 | 0.04 | 0.05 | 0.27 | 0.23 | 2.14 | 0.34 | 99.99  | 0.98 | 99.01   | 0.67 | 99.68  |
| LCM-19 | 2a  | 41.82 | 0.19 | 0.74 | 54.22 | 0.11 | 0.02 | 0.06 | 0.09 | 0.05 | 1.86 | 0.18 | 99.33  | 0.83 | 98.51   | 0.84 | 99.35  |
| LCM-19 | 2b  | 42.19 | 0.20 | 0.67 | 54.27 | 0.11 | 0.00 | 0.00 | 0.04 | 0.10 | 1.81 | 0.19 | 99.56  | 0.80 | 98.76   | 0.87 | 99.63  |
| LCM-19 | 2c  | 41.79 | 0.19 | 0.66 | 54.25 | 0.06 | 0.03 | 0.12 | 0.15 | 0.13 | 1.89 | 0.21 | 99.48  | 0.84 | 98.63   | 0.82 | 99.45  |
| LCM-19 | 3a  | 41.77 | 0.20 | 0.42 | 54.40 | 0.06 | 0.11 | 0.17 | 0.22 | 0.08 | 2.60 | 0.40 | 100.44 | 1.18 | 99.26   | 0.44 | 99.70  |
| LCM-19 | 3b  | 41.54 | 0.20 | 0.29 | 54.03 | 0.04 | 0.12 | 0.07 | 0.31 | 0.11 | 2.76 | 0.40 | 99.87  | 1.25 | 98.61   | 0.35 | 98.96  |
| LCM-19 | 3c  | 42.10 | 0.19 | 0.32 | 54.48 | 0.02 | 0.11 | 0.08 | 0.12 | 0.15 | 2.70 | 0.41 | 100.67 | 1.23 | 99.44   | 0.39 | 99.83  |
| LCM-19 | 4a  | 42.10 | 0.22 | 0.32 | 54.10 | 0.09 | 0.03 | 0.11 | 0.36 | 0.19 | 2.36 | 0.50 | 100.39 | 1.11 | 99.28   | 0.52 | 99.80  |
| LCM-19 | 4b  | 41.64 | 0.20 | 0.43 | 53.96 | 0.16 | 0.06 | 0.13 | 0.32 | 0.23 | 2.36 | 0.54 | 100.02 | 1.11 | 98.91   | 0.51 | 99.42  |
| LCM-19 | 4c  | 42.03 | 0.22 | 0.47 | 53.79 | 0.15 | 0.08 | 0.11 | 0.30 | 0.25 | 2.24 | 0.56 | 100.20 | 1.07 | 99.14   | 0.56 | 99.70  |
| LCM-19 | 6a  | 41.87 | 0.17 | 0.53 | 54.99 | 0.05 | 0.02 | 0.00 | 0.11 | 0.02 | 2.25 | 0.35 | 100.36 | 1.03 | 99.33   | 0.62 | 99.95  |
| LCM-19 | 6b  | 42.29 | 0.19 | 0.50 | 54.69 | 0.09 | 0.01 | 0.00 | 0.20 | 0.05 | 2.21 | 0.31 | 100.54 | 1.00 | 99.54   | 0.66 | 100.20 |
| LCM-20 | 7   | 42.12 | 0.17 | 0.23 | 54.29 | 0.09 | 0.05 | 0.05 | 0.28 | 0.14 | 2.40 | 0.41 | 100.22 | 1.10 | 99.12   | 0.53 | 99.65  |
| LCM-20 | 7   | 42.26 | 0.16 | 0.32 | 54.40 | 0.07 | 0.06 | 0.09 | 0.20 | 0.17 | 2.52 | 0.43 | 100.67 | 1.16 | 99.52   | 0.47 | 99.99  |
| LCM-20 | 7   | 42.11 | 0.20 | 0.31 | 54.43 | 0.10 | 0.06 | 0.08 | 0.20 | 0.06 | 2.52 | 0.41 | 100.48 | 1.16 | 99.32</ |      |        |

|        |    |       |      |      |       |      |      |      |      |      |      |      |        |      |        |      |        |
|--------|----|-------|------|------|-------|------|------|------|------|------|------|------|--------|------|--------|------|--------|
| LCM-21 | 1a | 41.40 | 0.20 | 0.52 | 54.07 | 0.10 | 0.03 | 0.00 | 0.12 | 0.15 | 2.29 | 0.59 | 99.45  | 1.10 | 98.35  | 0.52 | 98.87  |
| LCM-21 | 1b | 41.57 | 0.19 | 0.36 | 54.30 | 0.04 | 0.05 | 0.08 | 0.25 | 0.12 | 2.20 | 0.58 | 99.74  | 1.06 | 98.68  | 0.57 | 99.25  |
| LCM-21 | 1c | 41.49 | 0.23 | 0.45 | 53.87 | 0.02 | 0.02 | 0.10 | 0.23 | 0.21 | 2.42 | 0.60 | 99.66  | 1.16 | 98.50  | 0.45 | 98.95  |
| LCM-21 | 4a | 41.12 | 0.14 | 0.62 | 54.26 | 0.05 | 0.02 | 0.00 | 0.00 | 0.01 | 1.77 | 0.34 | 98.33  | 0.82 | 97.51  | 0.83 | 98.34  |
| LCM-21 | 4b | 41.87 | 0.08 | 0.69 | 53.97 | 0.10 | 0.04 | 0.01 | 0.00 | 0.13 | 1.64 | 0.36 | 98.89  | 0.77 | 98.12  | 0.89 | 99.01  |
| LCM-21 | 4c | 41.86 | 0.11 | 0.64 | 53.82 | 0.03 | 0.04 | 0.00 | 0.13 | 0.11 | 1.73 | 0.31 | 98.77  | 0.80 | 97.98  | 0.86 | 98.84  |
| LCM-21 | 5a | 40.69 | 0.58 | 0.36 | 52.96 | 0.31 | 0.16 | 0.38 | 0.84 | 0.47 | 2.63 | 0.41 | 99.80  | 1.20 | 98.59  | 0.39 | 98.98  |
| LCM-21 | 5b | 40.86 | 0.41 | 0.38 | 52.89 | 0.34 | 0.14 | 0.30 | 0.73 | 0.43 | 2.55 | 0.43 | 99.45  | 1.17 | 98.28  | 0.42 | 98.70  |
| LCM-22 | 1a | 41.62 | 0.26 | 0.64 | 54.81 | 0.06 | 0.10 | 0.02 | 0.06 | 0.08 | 2.68 | 0.21 | 100.53 | 1.18 | 99.36  | 0.46 | 99.82  |
| LCM-22 | 1b | 41.87 | 0.27 | 0.68 | 54.37 | 0.07 | 0.16 | 0.10 | 0.00 | 0.08 | 3.79 | 0.05 | 101.45 | 1.61 | 99.84  | 0.00 | 99.84  |
| LCM-22 | 2a | 41.62 | 0.24 | 0.52 | 53.43 | 0.09 | 0.18 | 0.13 | 0.30 | 0.13 | 2.69 | 0.40 | 99.72  | 1.22 | 98.50  | 0.38 | 98.88  |
| LCM-22 | 2b | 41.58 | 0.31 | 0.45 | 53.49 | 0.10 | 0.14 | 0.14 | 0.27 | 0.14 | 2.81 | 0.36 | 99.80  | 1.27 | 98.53  | 0.33 | 98.86  |
| LCM-22 | 2c | 41.47 | 0.25 | 0.60 | 53.77 | 0.13 | 0.18 | 0.14 | 0.33 | 0.09 | 2.80 | 0.41 | 100.17 | 1.27 | 98.90  | 0.33 | 99.23  |
| LCM-22 | 3a | 40.60 | 0.59 | 0.33 | 52.90 | 0.25 | 0.18 | 0.33 | 0.83 | 0.59 | 2.14 | 0.63 | 99.37  | 1.04 | 98.33  | 0.57 | 98.90  |
| LCM-22 | 3b | 41.05 | 0.63 | 0.36 | 52.90 | 0.28 | 0.12 | 0.36 | 0.78 | 0.41 | 2.16 | 0.64 | 99.70  | 1.05 | 98.65  | 0.56 | 99.21  |
| LCM-22 | 4a | 40.87 | 0.34 | 0.79 | 53.28 | 0.30 | 0.31 | 0.22 | 0.71 | 0.22 | 2.16 | 0.95 | 100.14 | 1.12 | 99.02  | 0.50 | 99.52  |
| LCM-22 | 4b | 41.64 | 0.21 | 0.75 | 53.16 | 0.31 | 0.26 | 0.23 | 0.55 | 0.22 | 2.05 | 0.81 | 100.19 | 1.04 | 99.14  | 0.59 | 99.73  |
| LCM-22 | 4c | 41.40 | 0.15 | 0.79 | 52.93 | 0.27 | 0.23 | 0.19 | 0.43 | 0.18 | 2.29 | 0.84 | 99.69  | 1.15 | 98.54  | 0.45 | 98.99  |
| LCM-22 | 5a | 41.26 | 0.32 | 0.38 | 53.49 | 0.24 | 0.23 | 0.20 | 0.53 | 0.18 | 2.18 | 0.67 | 99.69  | 1.07 | 98.62  | 0.55 | 99.17  |
| LCM-22 | 5b | 41.63 | 0.22 | 0.29 | 53.75 | 0.21 | 0.19 | 0.18 | 0.55 | 0.22 | 2.20 | 0.67 | 100.10 | 1.08 | 99.03  | 0.55 | 99.58  |
| LCM-22 | 6a | 41.25 | 0.27 | 0.52 | 54.43 | 0.05 | 0.14 | 0.00 | 0.18 | 0.14 | 2.55 | 0.46 | 100.00 | 1.18 | 98.82  | 0.44 | 99.26  |
| LCM-22 | 6b | 41.71 | 0.28 | 0.53 | 54.21 | 0.08 | 0.13 | 0.15 | 0.28 | 0.18 | 2.68 | 0.42 | 100.63 | 1.22 | 99.41  | 0.40 | 99.81  |
| LCM-22 | 7a | 41.18 | 0.31 | 0.57 | 54.39 | 0.25 | 0.26 | 0.14 | 0.33 | 0.12 | 2.05 | 0.92 | 100.52 | 1.07 | 99.45  | 0.57 | 100.02 |
| LCM-22 | 7b | 41.60 | 0.25 | 0.45 | 54.14 | 0.23 | 0.22 | 0.14 | 0.35 | 0.18 | 1.97 | 0.78 | 100.28 | 1.00 | 99.28  | 0.64 | 99.92  |
| LCM-22 | 8a | 41.47 | 0.26 | 0.38 | 53.91 | 0.15 | 0.25 | 0.13 | 0.49 | 0.27 | 2.27 | 0.94 | 100.51 | 1.17 | 99.34  | 0.45 | 99.79  |
| LCM-22 | 8c | 41.21 | 0.26 | 0.36 | 53.69 | 0.15 | 0.31 | 0.30 | 0.63 | 0.21 | 2.24 | 0.95 | 100.29 | 1.16 | 99.13  | 0.46 | 99.59  |
| LCM-23 | 2a | 41.81 | 0.39 | 0.32 | 53.91 | 0.18 | 0.08 | 0.25 | 0.36 | 0.17 | 2.61 | 0.60 | 100.69 | 1.24 | 99.46  | 0.38 | 99.84  |
| LCM-23 | 2b | 41.86 | 0.28 | 0.20 | 54.32 | 0.12 | 0.08 | 0.15 | 0.48 | 0.11 | 2.93 | 0.49 | 101.01 | 1.35 | 99.67  | 0.26 | 99.93  |
| LCM-23 | 2c | 42.11 | 0.25 | 0.29 | 54.51 | 0.15 | 0.08 | 0.12 | 0.43 | 0.16 | 2.81 | 0.56 | 101.47 | 1.31 | 100.16 | 0.31 | 100.47 |
| LCM-23 | 3a | 41.73 | 0.38 | 0.35 | 52.89 | 0.22 | 0.20 | 0.30 | 0.68 | 0.20 | 2.39 | 0.45 | 99.79  | 1.11 | 98.68  | 0.51 | 99.19  |
| LCM-23 | 3b | 41.58 | 0.19 | 0.35 | 53.84 | 0.21 | 0.23 | 0.10 | 0.48 | 0.19 | 2.36 | 0.49 | 100.02 | 1.11 | 98.92  | 0.52 | 99.44  |
| LCM-23 | 3c | 41.20 | 0.38 | 0.37 | 53.30 | 0.18 | 0.18 | 0.23 | 0.76 | 0.29 | 2.39 | 0.47 | 99.75  | 1.11 | 98.64  | 0.50 | 99.14  |
| LCM-23 | 4a | 42.06 | 0.18 | 0.08 | 55.00 | 0.06 | 0.02 | 0.02 | 0.13 | 0.06 | 3.44 | 0.00 | 101.05 | 1.45 | 99.60  | 0.15 | 99.75  |
| LCM-23 | 4b | 42.73 | 0.11 | 0.06 | 55.56 | 0.08 | 0.04 | 0.00 | 0.19 | 0.07 | 3.27 | 0.04 | 102.14 | 1.39 | 100.76 | 0.24 | 101.00 |
| LCM-23 | 5a | 41.88 | 0.48 | 0.15 | 53.96 | 0.07 | 0.06 | 0.39 | 0.69 | 0.42 | 2.39 | 0.80 | 101.27 | 1.19 | 100.09 | 0.44 | 100.53 |
| LCM-23 | 5b | 41.95 | 0.28 | 0.20 | 54.33 | 0.18 | 0.09 | 0.19 | 0.24 | 0.13 | 2.15 | 0.81 | 100.54 | 1.09 | 99.45  | 0.55 | 100.00 |
| LCM-23 | 5c | 41.88 | 0.28 | 0.21 | 54.98 | 0.16 | 0.09 | 0.28 | 0.37 | 0.11 | 2.31 | 0.83 | 101.49 | 1.16 | 100.33 | 0.48 | 100.81 |
| LCM-25 | 1a | 41.72 | 0.32 | 0.41 | 54.59 | 0.06 | 0.22 | 0.24 | 0.40 | 0.20 | 2.87 | 0.43 | 101.46 | 1.31 | 100.16 | 0.31 | 100.47 |
| LCM-25 | 1b | 41.52 | 0.34 | 0.52 | 54.60 | 0.09 | 0.17 | 0.14 | 0.43 | 0.24 | 2.96 | 0.45 | 101.45 | 1.35 | 100.11 | 0.27 | 100.38 |
| LCM-25 | 1c | 40.93 | 0.23 | 0.44 | 54.29 | 0.12 | 0.18 | 0.20 | 0.56 | 0.24 | 2.95 | 0.42 | 100.56 | 1.34 | 99.22  | 0.26 | 99.48  |
| LCM-25 | 2a | 41.11 | 0.30 | 0.34 | 53.96 | 0.25 | 0.24 | 0.20 | 0.59 | 0.40 | 2.75 | 0.59 | 100.73 | 1.29 | 99.44  | 0.31 | 99.75  |
| LCM-25 | 2b | 41.71 | 0.26 | 0.42 | 53.52 | 0.25 | 0.21 | 0.21 | 0.52 | 0.29 | 2.78 | 0.53 | 100.70 | 1.29 | 99.41  | 0.31 | 99.72  |
| LCM-25 | 2c | 41.58 | 0.26 | 0.54 | 53.64 | 0.34 | 0.22 | 0.34 | 0.52 | 0.32 | 2.85 | 0.49 | 101.08 | 1.31 | 99.77  | 0.29 | 100.06 |
| LCM-25 | 3a | 41.11 | 0.79 | 0.27 | 54.06 | 0.17 | 0.12 | 0.36 | 0.87 | 0.45 | 2.97 | 0.52 | 101.68 | 1.37 | 100.31 | 0.23 | 100.54 |
| LCM-25 | 3b | 40.51 | 0.86 | 0.26 | 52.97 | 0.19 | 0.14 | 0.33 | 1.00 | 0.65 | 2.69 | 0.47 | 100.06 | 1.24 | 98.82  | 0.36 | 99.18  |
| LCM-25 | 4a | 41.22 | 0.18 | 0.32 | 53.92 | 0.18 | 0.20 | 0.31 | 0.60 | 0.34 | 2.73 | 0.52 | 100.52 | 1.26 | 99.26  | 0.34 | 99.60  |
| LCM-25 | 4b | 41.16 | 0.18 | 0.33 | 53.26 | 0.16 | 0.25 | 0.22 | 0.58 | 0.31 | 2.73 | 0.52 | 99.70  | 1.27 | 98.43  | 0.32 | 98.75  |
| LCM-25 | 5b | 42.59 | 0.22 | 0.39 | 54.20 | 0.07 | 0.06 | 0.11 | 0.23 | 0.16 | 2.49 | 0.77 | 101.29 | 1.22 | 100.07 | 0.40 | 100.47 |
| LCM-25 | 5b | 42.55 | 0.29 | 0.42 | 54.56 | 0.09 | 0.05 | 0.12 | 0.24 | 0.14 | 2.31 | 0.83 | 101.61 | 1.16 | 100.45 | 0.48 | 100.93 |
| LCM-25 | 6a | 41.81 | 0.23 | 0.64 | 54.23 | 0.26 | 0.17 | 0.00 | 0.25 | 0.22 | 2.49 | 0.50 | 100.80 | 1.16 | 99.64  | 0.47 | 100.11 |
| LCM-25 | 6b | 41.86 | 0.19 | 0.72 | 53.75 | 0.21 | 0.10 | 0.10 | 0.25 | 0.17 | 2.29 | 0.48 | 100.12 | 1.07 | 99.04  | 0.56 | 99.60  |
| LCM-25 | 6c | 42.12 | 0.15 | 0.54 | 53.80 | 0.23 | 0.17 | 0.08 | 0.25 | 0.20 | 2.23 | 0.50 | 100.28 | 1.05 | 99.23  | 0.59 | 99.82  |
| LCM-26 | 1  | 40.84 | 0.64 | 0.15 | 52.79 | 0.35 | 0.18 | 0.35 | 0.83 | 0.00 | 2.43 | 0.32 | 98.88  | 1.09 | 97.79  | 0.51 | 98.30  |
| LCM-26 | 1  | 40.79 | 0.28 | 0.16 | 53.16 | 0.32 | 0.32 | 0.20 | 0.52 | 0.99 | 2.54 | 0.33 | 99.60  | 1.14 | 98.46  | 0.46 | 98.92  |
| LCM-26 | 1  | 41.17 | 0.23 | 0.10 | 53.39 | 0.35 | 0.31 | 0.22 | 0.52 | 0.36 | 2.74 | 0.33 | 99.71  | 1.23 | 98.48  | 0.37 | 98.85  |
| LCM-26 | 2  | 41.28 | 0.34 | 0.20 | 54.08 | 0.08 | 0.15 | 0.01 | 0.07 | 0.09 | 2.26 | 0.27 | 98.82  | 1.01 | 97.81  | 0.62 | 98.43  |
| LCM-26 | 2  | 41.55 | 0.28 | 0.35 | 54.06 | 0.13 | 0.16 | 0.01 | 0.06 | 0.10 | 2.11 | 0.23 | 99.03  | 0.94 | 98.09  | 0.70 | 98.79  |
| LCM-26 | 2  | 41.06 | 0.53 | 0.29 | 53.87 | 0.12 | 0.17 | 0.05 | 0.01 | 0.05 | 2.01 | 0.25 | 98.41  | 0.90 | 97.51  | 0.74 | 98.25  |
| LCM-26 | 3  | 41.41 | 0.25 | 0.08 | 53.69 | 0.30 | 0.24 | 0.17 | 0.46 | 0.31 | 2.61 | 0.36 | 99.87  | 1.18 | 98.69  | 0.43 | 99.12  |
| LCM-26 | 3  | 40.91 | 0.26 | 0.19 | 53.68 | 0.29 | 0.24 | 0.14 | 0.43 | 0.31 | 2.46 | 0.39 | 99.30  | 1.12 | 98.17  | 0.49 | 98.66  |
| LCM-26 | 3  | 40.89 | 0.50 | 0.22 | 53.29 | 0.27 | 0.15 | 0.27 | 0.70 | 0.53 | 2.68 | 0.34 | 99.84  | 1.21 | 98.64  | 0.39 | 99.03  |
| LCM-26 | 4  | 41.48 | 0.33 | 0.37 | 53.74 | 0.05 | 0.08 | 0.05 | 0.15 | 0.08 | 2.33 | 0.27 | 98.93  | 1.04 | 97.89  | 0.58 | 98.47  |
| LCM-26 | 4  | 41.31 | 0.28 | 0.40 | 53.97 | 0.05 | 0.07 | 0.04 | 0.09 | 0.12 | 2.27 | 0.28 | 98.89  | 1.02 | 97.87  | 0.61 | 98.48  |
| LCM-26 | 4  | 41.42 | 0.25 | 0.42 | 53.81 | 0.07 | 0.10 | 0.01 | 0.08 | 0.03 | 2.34 | 0.27 | 98.81  | 1.05 | 97.76  | 0.58 | 98.34  |
| LCM-26 | 5  | 40.48 | 0.22 | 0.26 | 53.34 | 0.32 | 0.29 | 0.15 | 0.44 | 0.33 | 2.68 | 0.35 | 98.85  | 1.21 | 97.64  | 0.39 | 98.03  |
| LCM-26 | 5  | 40.88 | 0.23 | 0.17 | 53.53 | 0.32 | 0.24 | 0.17 | 0.37 | 0.33 | 2.50 | 0.35 | 99.08  | 1.13 | 97.95  | 0.48 | 98.43  |
| LCM-26 | 6  | 40.68 | 0.37 | 0.13 | 53.33 | 0.28 | 0.23 | 0.26 | 0.60 | 0.44 | 2.74 | 0.38 | 99.44  | 1.24 | 98.20  | 0.35 | 98.55  |
| LCM-26 | 6  | 41.03 | 0.33 | 0.08 | 53.63 | 0.24 | 0.16 | 0.22 | 0.50 | 0.39 | 2.69 | 0.34 | 99.61  | 1.21 | 98.40  | 0.39 | 98.79  |
| LCM-26 | 6  | 40.52 | 0.37 | 0.11 | 53.36 | 0.26 | 0.20 | 0.21 | 0.61 | 0.43 | 2.61 | 0.35 | 99.03  | 1.18 | 97.85  | 0.41 | 98.26  |
| LCM-26 | 7  | 41.24 | 0.28 | 0.13 | 53.64 | 0.18 | 0.24 | 0.20 | 0.39 | 0.24 | 2.43 | 0.49 | 99.46  | 1.14 | 98.32  | 0.48 | 98.80  |
| LCM-26 | 7  | 41.62 | 0.21 | 0.07 | 53.97 | 0.18 | 0.23 | 0.15 | 0.38 | 0.25 | 2.50 | 0.49 | 100.05 | 1.16 | 98.89  | 0.46 | 99.35  |
| LCM-26 | 7  | 41.72 | 0.25 | 0.10 | 53.95 | 0.21 | 0.21 | 0.10 | 0.41 | 0.28 | 2.36 | 0.48 | 100.06 | 1.10 | 98.95  | 0.52 | 99.47  |
| LC     |    |       |      |      |       |      |      |      |      |      |      |      |        |      |        |      |        |

|        |     |       |      |      |       |      |      |      |      |      |      |      |        |      |        |      |        |
|--------|-----|-------|------|------|-------|------|------|------|------|------|------|------|--------|------|--------|------|--------|
| LCM-26 | 12  | 40.65 | 0.60 | 0.06 | 53.15 | 0.32 | 0.17 | 0.29 | 0.75 | 0.58 | 2.41 | 0.36 | 99.33  | 1.10 | 98.24  | 0.51 | 98.75  |
| LCM-26 | 12  | 40.99 | 0.60 | 0.21 | 53.19 | 0.27 | 0.15 | 0.30 | 0.72 | 0.45 | 2.58 | 0.34 | 99.79  | 1.16 | 98.63  | 0.44 | 99.07  |
| LCM-26 | 13  | 40.87 | 0.75 | 0.20 | 52.66 | 0.29 | 0.15 | 0.33 | 0.86 | 0.65 | 2.90 | 0.33 | 99.98  | 1.29 | 98.68  | 0.29 | 98.97  |
| LCM-26 | 13  | 40.62 | 0.75 | 0.10 | 52.83 | 0.26 | 0.16 | 0.36 | 0.84 | 0.58 | 2.69 | 0.38 | 99.56  | 1.22 | 98.34  | 0.37 | 98.71  |
| LCM-26 | 13  | 40.64 | 0.71 | 0.22 | 52.73 | 0.27 | 0.16 | 0.26 | 0.81 | 0.62 | 2.79 | 0.37 | 99.58  | 1.26 | 98.32  | 0.32 | 98.64  |
| LCM-26 | 14  | 41.20 | 0.24 | 0.09 | 53.68 | 0.28 | 0.25 | 0.17 | 0.51 | 0.34 | 2.62 | 0.33 | 99.71  | 1.18 | 98.53  | 0.43 | 98.96  |
| LCM-26 | 14  | 41.29 | 0.25 | 0.18 | 53.66 | 0.30 | 0.27 | 0.11 | 0.45 | 0.28 | 2.53 | 0.33 | 99.65  | 1.14 | 98.51  | 0.47 | 98.98  |
| LCM-26 | 14  | 40.88 | 0.29 | 0.12 | 53.26 | 0.29 | 0.29 | 0.19 | 0.44 | 0.28 | 2.52 | 0.36 | 98.92  | 1.14 | 97.78  | 0.46 | 98.24  |
| LCM-26 | 15  | 40.69 | 0.65 | 0.16 | 53.20 | 0.29 | 0.11 | 0.35 | 0.80 | 0.54 | 2.66 | 0.35 | 99.79  | 1.20 | 98.59  | 0.40 | 98.99  |
| LCM-26 | 15  | 40.75 | 0.52 | 0.07 | 53.16 | 0.26 | 0.12 | 0.32 | 0.69 | 0.47 | 2.55 | 0.37 | 99.27  | 1.16 | 98.11  | 0.44 | 98.55  |
| LCM-26 | 15  | 40.68 | 0.68 | 0.10 | 52.91 | 0.27 | 0.14 | 0.35 | 0.81 | 0.70 | 2.75 | 0.35 | 99.74  | 1.24 | 98.50  | 0.35 | 98.85  |
| LCM-27 | 10a | 40.44 | 0.63 | 0.25 | 54.02 | 0.27 | 0.20 | 0.32 | 0.81 | 0.61 | 2.25 | 0.00 | 99.81  | 0.95 | 98.86  | 0.70 | 99.56  |
| LCM-27 | 10b | 40.17 | 0.61 | 0.34 | 54.01 | 0.26 | 0.17 | 0.35 | 0.88 | 0.61 | 2.18 | 0.01 | 99.60  | 0.92 | 98.68  | 0.72 | 99.40  |
| LCM-27 | 11a | 40.70 | 0.27 | 0.36 | 54.16 | 0.25 | 0.23 | 0.21 | 0.51 | 0.27 | 1.92 | 0.01 | 98.89  | 0.81 | 98.08  | 0.85 | 98.93  |
| LCM-27 | 11b | 41.03 | 0.50 | 0.34 | 53.74 | 0.25 | 0.18 | 0.30 | 0.80 | 0.56 | 1.86 | 0.01 | 99.56  | 0.79 | 98.77  | 0.88 | 99.65  |
| LCM-27 | 2a  | 41.35 | 0.26 | 0.42 | 55.20 | 0.22 | 0.21 | 0.15 | 0.37 | 0.26 | 2.39 | 0.01 | 100.84 | 1.01 | 99.83  | 0.66 | 100.49 |
| LCM-27 | 2b  | 41.43 | 0.27 | 0.44 | 55.03 | 0.24 | 0.14 | 0.13 | 0.33 | 0.23 | 2.43 | 0.01 | 100.66 | 1.02 | 99.64  | 0.63 | 100.27 |
| LCM-27 | 3a  | 40.55 | 0.32 | 0.38 | 54.85 | 0.23 | 0.19 | 0.15 | 0.55 | 0.27 | 1.90 | 0.01 | 99.38  | 0.80 | 98.58  | 0.87 | 99.45  |
| LCM-27 | 3b  | 40.92 | 0.28 | 0.40 | 54.68 | 0.23 | 0.20 | 0.18 | 0.47 | 0.32 | 1.81 | 0.01 | 99.47  | 0.76 | 98.71  | 0.92 | 99.63  |
| LCM-27 | 4a  | 41.27 | 0.36 | 0.58 | 54.93 | 0.14 | 0.18 | 0.12 | 0.47 | 0.35 | 2.59 | 0.01 | 100.99 | 1.09 | 99.90  | 0.56 | 100.46 |
| LCM-27 | 4b  | 41.10 | 0.27 | 0.54 | 55.24 | 0.11 | 0.19 | 0.19 | 0.44 | 0.21 | 2.72 | 0.00 | 101.02 | 1.15 | 99.87  | 0.50 | 100.37 |
| LCM-27 | 5a  | 40.60 | 0.39 | 0.76 | 55.14 | 0.06 | 0.07 | 0.08 | 0.29 | 0.20 | 2.76 | 0.01 | 100.36 | 1.17 | 99.20  | 0.46 | 99.66  |
| LCM-27 | 5b  | 40.69 | 0.35 | 0.63 | 55.13 | 0.07 | 0.10 | 0.12 | 0.30 | 0.18 | 2.57 | 0.00 | 100.14 | 1.08 | 99.05  | 0.56 | 99.61  |
| LCM-27 | 6a  | 41.11 | 0.25 | 0.26 | 54.70 | 0.23 | 0.21 | 0.21 | 0.49 | 0.36 | 1.91 | 0.00 | 99.73  | 0.81 | 98.93  | 0.87 | 99.80  |
| LCM-27 | 6b  | 41.51 | 0.28 | 0.37 | 54.56 | 0.21 | 0.21 | 0.27 | 0.52 | 0.38 | 2.01 | 0.00 | 100.32 | 0.85 | 99.47  | 0.83 | 100.30 |
| LCM-27 | 7a  | 39.33 | 1.01 | 0.37 | 53.43 | 0.28 | 0.22 | 0.42 | 1.08 | 0.79 | 2.08 | 0.01 | 99.00  | 0.88 | 98.13  | 0.76 | 98.89  |
| LCM-27 | 7b  | 39.87 | 0.78 | 0.29 | 54.09 | 0.29 | 0.21 | 0.39 | 0.96 | 0.71 | 2.19 | 0.00 | 99.78  | 0.92 | 98.85  | 0.72 | 99.57  |
| LCM-27 | 8a  | 40.61 | 0.68 | 0.29 | 53.79 | 0.26 | 0.22 | 0.29 | 0.87 | 0.58 | 2.02 | 0.01 | 99.62  | 0.85 | 98.77  | 0.80 | 99.57  |
| LCM-27 | 8b  | 40.13 | 0.69 | 0.38 | 54.14 | 0.27 | 0.21 | 0.34 | 0.89 | 0.79 | 1.89 | 0.01 | 99.72  | 0.80 | 98.92  | 0.87 | 99.79  |
| LCM-27 | 9a  | 41.37 | 0.21 | 0.41 | 53.70 | 0.23 | 0.17 | 0.20 | 0.50 | 0.36 | 1.90 | 0.00 | 99.04  | 0.80 | 98.24  | 0.86 | 99.10  |
| LCM-27 | 9b  | 41.34 | 0.23 | 0.28 | 54.33 | 0.24 | 0.17 | 0.19 | 0.54 | 0.35 | 2.00 | 0.01 | 99.68  | 0.84 | 98.83  | 0.82 | 99.65  |
| LCM-29 | 10a | 41.70 | 0.18 | 0.79 | 53.81 | 0.03 | 0.12 | 0.07 | 0.30 | 0.11 | 1.73 | 0.42 | 99.26  | 0.82 | 98.44  | 0.84 | 99.28  |
| LCM-29 | 10b | 41.81 | 0.20 | 0.68 | 53.81 | 0.12 | 0.12 | 0.08 | 0.37 | 0.07 | 1.92 | 0.42 | 99.61  | 0.91 | 98.70  | 0.75 | 99.45  |
| LCM-29 | 10c | 42.33 | 0.23 | 0.64 | 53.11 | 0.07 | 0.11 | 0.14 | 0.31 | 0.13 | 1.93 | 0.47 | 99.47  | 0.92 | 98.55  | 0.72 | 99.27  |
| LCM-29 | 1a  | 41.92 | 0.18 | 0.31 | 54.46 | 0.12 | 0.09 | 0.04 | 0.23 | 0.21 | 1.82 | 0.61 | 100.00 | 0.90 | 99.10  | 0.76 | 99.86  |
| LCM-29 | 1b  | 42.24 | 0.15 | 0.39 | 54.56 | 0.15 | 0.08 | 0.11 | 0.32 | 0.16 | 1.92 | 0.64 | 100.72 | 0.96 | 99.76  | 0.71 | 100.47 |
| LCM-29 | 1c  | 41.64 | 0.21 | 0.43 | 54.63 | 0.20 | 0.10 | 0.07 | 0.29 | 0.13 | 1.86 | 0.64 | 100.19 | 0.93 | 99.26  | 0.74 | 100.00 |
| LCM-29 | 2a  | 42.01 | 0.15 | 0.79 | 54.20 | 0.11 | 0.10 | 0.08 | 0.26 | 0.09 | 1.91 | 0.55 | 100.26 | 0.93 | 99.33  | 0.73 | 100.06 |
| LCM-29 | 2b  | 42.59 | 0.24 | 0.52 | 54.73 | 0.11 | 0.06 | 0.21 | 0.33 | 0.23 | 1.86 | 0.51 | 101.40 | 0.90 | 100.50 | 0.78 | 101.28 |
| LCM-29 | 3a  | 42.38 | 0.22 | 0.54 | 54.25 | 0.33 | 0.08 | 0.06 | 0.37 | 0.22 | 2.03 | 0.68 | 101.15 | 1.01 | 100.15 | 0.65 | 100.80 |
| LCM-29 | 3b  | 41.70 | 0.21 | 0.29 | 54.15 | 0.09 | 0.06 | 0.09 | 0.33 | 0.18 | 1.94 | 0.64 | 99.69  | 0.96 | 98.73  | 0.68 | 99.41  |
| LCM-29 | 4a  | 41.41 | 0.20 | 0.52 | 54.43 | 0.13 | 0.12 | 0.07 | 0.22 | 0.08 | 1.86 | 0.88 | 99.92  | 0.98 | 98.93  | 0.66 | 99.59  |
| LCM-29 | 4b  | 41.39 | 0.26 | 0.55 | 54.24 | 0.17 | 0.14 | 0.09 | 0.24 | 0.18 | 1.68 | 0.92 | 99.84  | 0.91 | 98.92  | 0.74 | 99.66  |
| LCM-29 | 5a  | 41.47 | 0.15 | 0.43 | 54.40 | 0.21 | 0.08 | 0.17 | 0.33 | 0.09 | 1.92 | 0.62 | 99.88  | 0.95 | 98.93  | 0.70 | 99.63  |
| LCM-29 | 5b  | 42.37 | 0.21 | 0.35 | 55.32 | 0.18 | 0.08 | 0.12 | 0.26 | 0.18 | 2.01 | 0.66 | 101.72 | 0.99 | 100.73 | 0.68 | 101.41 |
| LCM-29 | 6a  | 41.07 | 0.23 | 0.50 | 54.25 | 0.20 | 0.10 | 0.07 | 0.30 | 0.14 | 1.74 | 0.69 | 99.28  | 0.89 | 98.39  | 0.77 | 99.16  |
| LCM-29 | 6b  | 41.49 | 0.24 | 0.44 | 53.98 | 0.15 | 0.15 | 0.12 | 0.28 | 0.17 | 1.99 | 0.70 | 99.70  | 0.99 | 98.70  | 0.65 | 99.35  |
| LCM-29 | 7a  | 41.28 | 0.18 | 0.32 | 53.51 | 0.24 | 0.18 | 0.20 | 0.26 | 0.25 | 2.18 | 0.71 | 99.31  | 1.08 | 98.23  | 0.54 | 98.77  |
| LCM-29 | 7b  | 41.01 | 0.17 | 0.52 | 53.82 | 0.30 | 0.14 | 0.15 | 0.33 | 0.21 | 2.09 | 0.74 | 99.47  | 1.05 | 98.42  | 0.57 | 98.99  |
| LCM-29 | 8a  | 40.77 | 0.22 | 0.40 | 53.96 | 0.28 | 0.15 | 0.20 | 0.32 | 0.17 | 2.03 | 0.72 | 99.23  | 1.02 | 98.21  | 0.61 | 98.82  |
| LCM-29 | 8b  | 40.81 | 0.18 | 0.41 | 53.57 | 0.30 | 0.15 | 0.24 | 0.37 | 0.26 | 2.12 | 0.77 | 99.16  | 1.06 | 98.09  | 0.55 | 98.64  |
| LCM-29 | 9a  | 42.14 | 0.14 | 0.35 | 54.65 | 0.15 | 0.04 | 0.13 | 0.36 | 0.24 | 1.95 | 0.68 | 100.83 | 0.97 | 99.85  | 0.68 | 100.53 |
| LCM-29 | 9b  | 42.01 | 0.18 | 0.37 | 54.46 | 0.24 | 0.10 | 0.11 | 0.25 | 0.18 | 2.00 | 0.62 | 100.52 | 0.98 | 99.54  | 0.67 | 100.21 |





[illegible]
